# Supplementary material for: Cell-Type Specific Analysis of Selenium-Related Genes in Brain
Source: MDPI journal article supplement (doi:10.3390/antiox8050120), 2019-05-05
Supplement: s1 [file s1]

## Sheet: FIG 2A = Ms Selenoproteins
Species	Cell Type	Region	# Cells	Gpx1_log10_cpm	Gpx2_log10_cpm	Gpx3_log10_cpm	Gpx4_log10_cpm	Txnrd1_log10_cpm	Txnrd2_log10_cpm	Txnrd3_log10_cpm	Dio1_log10_cpm	Dio2_log10_cpm	Dio3_log10_cpm	Sep15_log10_cpm	Ept1_log10_cpm	Selk_log10_cpm	Selm_log10_cpm	Sepn1_log10_cpm	Selo_log10_cpm	Sepp1_log10_cpm	Msrb1_log10_cpm	Vimp_log10_cpm	Selt_log10_cpm	Sepw1_log10_cpm	Sephs2_log10_cpm
Mouse	Astrocytes	All (ATM, pVIS)	583	0.709696	0	0.009945	1.95489	0.32907	0.217402	0.036788	0	2.10218	0	2.24107	0.301921	2.54743	1.19773	0.352257	0.300066	2.39761	0.355801	2.18268	0.528437	2.23126	0.152151
Mouse	Endothelial	All (ATM, pVIS)	190	2.76959	0.002403	0.015696	2.32076	0.406125	0.143305	0.087178	0	0.003227	0	2.43849	0.106845	2.52522	1.47572	0.338473	0.255453	3.01053	0.31554	0.485409	0.660009	2.44076	0.198495
Mouse	Microglia	All (ATM, pVIS)	106	2.89645	0	0.008607	1.61311	0.217441	0.284085	0.024138	0	0.004953	0	2.03574	0.085995	2.23264	0.191575	0.120983	0.081457	3.08962	0.253097	1.35415	0.586087	0.952686	0.070983
Mouse	Oligodendrocytes	All (ATM, pVIS)	133	1.14267	0	0.027013	2.72252	0.410068	0.426122	0.034715	0	0.050411	0	2.70081	0.639203	2.96911	2.06835	0.256736	0.391089	0.932074	1.08743	2.2054	1.25186	2.64426	0.382346
Mouse	OPCs	All (ATM, pVIS)	57	0.973231	0	0.233848	1.44605	0.67356	0.225967	0	0	0.207565	0	2.55091	0.224416	2.82972	1.3291	0.640946	0.267219	0.094039	0.281441	1.93994	0.942913	2.194	0.363679

## Sheet: Fig 2B = Hu Selenoproteins
Species	Cell Type	Region	# Cells	Gpx1_log10_cpm	Gpx2_log10_cpm	Gpx3_log10_cpm	Gpx4_log10_cpm	Txnrd1_log10_cpm	Txnrd2_log10_cpm	Txnrd3_log10_cpm	Dio1_log10_cpm	Dio2_log10_cpm	Dio3_log10_cpm	Sep15_log10_cpm	Ept1_log10_cpm	Selk_log10_cpm	Selm_log10_cpm	Sepn1_log10_cpm	Selo_log10_cpm	Sepp1_log10_cpm	Msrb1_log10_cpm	Vimp_log10_cpm	Selt_log10_cpm	Sepw1_log10_cpm	Sephs2_log10_cpm
Human	Astrocytes	MTG	300	0.059491	0.000764	0.130196	0.433746	0.727782	0.301484	0.240472	0.040981	1.03817	0	0.592052	0.395628	0.295114	0.199886	0.21123	0.525624	0.153121	0.073618	0.39627	0.463008	1.10083	0.069743
Human	Endothelial	MTG	9	0	0	0.436745	0.255806	0.425944	0.022886	0.197768	0.041702	0	0	0.277711	0.599719	0.308257	0.430348	0.738906	0.342118	0.728435	0.043393	0.230906	0.630686	1.70084	0
Human	Microglia	MTG	63	0.958623	0	0.206942	0.480861	0.433938	0.128449	0.078332	0.039019	0.014656	0	0.462295	0.26854	0.18086	0.022643	0.202867	0.314011	0.156059	0	0.194921	0.336165	0.30785	0.19315
Human	Oligodendrocytes	MTG	313	0.101872	0.010897	0.161948	0.52761	0.423228	0.190785	0.094604	0.091796	0.013043	0	0.839395	0.45744	0.462798	0.277995	0.097554	0.414973	1.09942	0.043349	0.594219	0.801251	1.82528	0.090637
Human	OPCs	MTG	238	0.083762	0	0.149207	0.308154	0.344081	0.190576	0.22577	0.019984	0.157197	0	0.693709	0.483409	0.385478	0.129527	0.331304	0.36072	0.1265	0.033267	0.33702	0.581538	0.657603	0.018915

## Sheet: Fig 2C = Ms Se-related 
Species	Cell Type	Region	# Cells	Lrp1_log10_cpm	Lrp2_log10_cpm	Lrp8_log10_cpm	Scly_log10_cpm	Selenbp1_log10_cpm	Secisbp2_log10_cpm	Sepsecs_log10_cpm	Trnau1ap_log10_cpm	Eefsec_log10_cpm	Eif4a3_log10_cpm	Rpl30_log10_cpm	Ncl_log10_cpm
Mouse	Astrocytes	All (ATM, pVIS)	583	1.40701	0	0.745949	0.230828	0.835484	0.408131	0.204629	0.485853	0.275994	1.00509	0.934232	1.07091
Mouse	Endothelial	All (ATM, pVIS)	190	0.081628	0	1.27798	0.131285	0.034901	0.284988	0.101201	0.829059	0.387199	1.54214	1.62744	1.74133
Mouse	Microglia	All (ATM, pVIS)	106	1.5087	0	0	0.055231	0.155034	0.357495	0.128574	0.251897	0.586035	0.926022	1.89827	1.41257
Mouse	Oligodendrocytes	All (ATM, pVIS)	133	0.088083	0	0.011329	0.353193	0.155449	0.566138	0.12141	0.635484	0.624114	1.67801	1.62751	1.91163
Mouse	OPCs	All (ATM, pVIS)	57	2.42553	0	0.308026	0.250112	0.022351	0.33996	0.203811	0.522584	0.677284	0.948467	1.33526	1.57835

## Sheet: Fig 2D = Hu Se-related
Species	Cell Type	Region	# Cells	Lrp1_log10_cpm	Lrp2_log10_cpm	Lrp8_log10_cpm	Scly_log10_cpm	Selenbp1_log10_cpm	Secisbp2_log10_cpm	Sepsecs_log10_cpm	Trnau1ap_log10_cpm	Eefsec_log10_cpm	Eif4a3_log10_cpm	Rpl30_log10_cpm	Ncl_log10_cpm
Human	Astrocytes	MTG	300	1.8623	0.203054	0.614885	0.012051	1.36697	0.872822	0.267304	0.512799	0.41141	0.059338	0.212846	0.482531
Human	Endothelial	MTG	9	0.956195	0.151327	1.21305	0	1.03831	1.5191	0.299927	0.269727	0.116779	0.02382	0.614797	0.480126
Human	Microglia	MTG	63	0.986297	0.212468	0.252531	0	0.486645	0.910962	0.275306	0.170338	0.18511	0.191601	0.256092	0.490278
Human	Oligodendrocytes	MTG	313	0.21475	1.47515	0.055269	0.014135	0.057547	0.89711	0.259619	0.499905	0.228765	0.119844	0.347839	0.402675
Human	OPCs	MTG	238	1.85285	0.176172	0.375717	0.021744	0.039932	0.821081	0.297114	0.352051	0.472036	0.07035	0.283149	0.423647

## Sheet: Ms Non-Neuronal
sample_name	cluster_id	cluster_color	cluster_label	class_id	class_color	class_label	Gpx1_log10_cpm	Gpx2_log10_cpm	Gpx3_log10_cpm	Gpx4_log10_cpm	Txnrd1_log10_cpm	Txnrd2_log10_cpm	Txnrd3_log10_cpm	Dio1_log10_cpm	Dio2_log10_cpm	Dio3_log10_cpm	Sep15_log10_cpm	Ept1_log10_cpm	Selk_log10_cpm	Selm_log10_cpm	Sepn1_log10_cpm	Selo_log10_cpm	Sepp1_log10_cpm	Msrb1_log10_cpm	Vimp_log10_cpm	Selt_log10_cpm	Sepw1_log10_cpm	Sephs2_log10_cpm	Lrp1_log10_cpm	Lrp2_log10_cpm	Lrp8_log10_cpm	Scly_log10_cpm	Selenbp1_log10_cpm	Secisbp2_log10_cpm	Sepsecs_log10_cpm	Trnau1ap_log10_cpm	Eefsec_log10_cpm	Eif4a3_log10_cpm	Rpl30_log10_cpm	Ncl_log10_cpm
F2S4_160219_001_F01	119	#476655	OPC Pdgfra Grm5	3	#808285	Non-Neuronal	0	0	0	1.84857	0	0	0	0	0	0	2.45222	0.604705	2.98261	1.7888	0	0	0	0	2.42839	0.701791	2.41848	2.36524	2.65382	0	0	0	0	1.5349	0	0	2.49065	2.20762	2.26358	2.04881
F2S4_160219_001_H01	118	#665C47	Astro Aqp4	3	#808285	Non-Neuronal	0	0	0	1.743	0	0	0	0	2.83015	0	2.41991	0	1.38537	1.0295	0	0	2.57013	1.9738	1.69473	0	0.688518	0	1.6	0	1.743	0	0	0	0	0	2.54203	0	0	1.67736
F2S4_160219_002_A01	133	#598069	Microglia Siglech	3	#808285	Non-Neuronal	2.85389	0	0	1.97535	0	0	0	0	0	0	2.29124	0	2.68597	0	0	0	3.36524	0	2.61841	1.87081	0	0	0.547347	0	0	1.60834	0	0	0	0	0	0	2.20913	2.069
F2S4_160219_002_C01	121	#6B998D	Oligo Rassf10	3	#808285	Non-Neuronal	2.05755	0	0	2.31734	0	1.78631	0	0	0	0	3.25241	2.1354	2.66246	1.29199	1.87393	1.84097	0	0.631469	2.48581	1.83058	2.30576	1.46877	0	0	0	1.3989	0	1.56272	1.29199	0	1.4999	2.40877	1.88952	2.43309
F2S4_160219_002_F01	133	#598069	Microglia Siglech	3	#808285	Non-Neuronal	2.77182	0	0	0	0	1.02632	0	0	0	0	2.16566	0	2.14288	0	0	0	3.46562	0	0	1.40818	1.66196	0	2.70303	0	0	0	0	1.75289	0	0	0	0	2.50473	2.34288
F2S4_160219_002_G01	133	#598069	Microglia Siglech	3	#808285	Non-Neuronal	3.65712	0	0	0	0	0	0	0	0	0	2.89856	0	2.86189	0	0	0	1.12096	0	0	0	0	0	0.851614	0	0	0	0	1.43055	0	0	0	1.00684	1.82372	2.60963
F2S4_160219_003_A01	133	#598069	Microglia Siglech	3	#808285	Non-Neuronal	2.5441	0	0	2.1435	0	0	0	0	0	0	2.7906	0	2.72245	0	0	0	3.56712	0	2.21751	1.91699	1.41574	0	2.90048	0	0	0	0	0	0	2.31432	0	0	2.02873	2.39201
F2S4_160219_003_C01	118	#665C47	Astro Aqp4	3	#808285	Non-Neuronal	0	0	0	2.1081	0	0	0	0	2.70326	0	0	0	2.25326	0	0	0	2.70107	0	2.5276	0	0	0	2.67616	0	0.682858	1.88851	0	0	0	0	0	0	0	2.49526
F2S4_160219_003_D01	123	#476662	Oligo Synpr	3	#808285	Non-Neuronal	0	0	0	2.63798	2.19636	0	0	0	0	0	3.03741	0.230526	2.8318	1.92601	2.02261	0	3.42489	1.84279	2.33725	1.3426	2.37985	1.80159	0	0	0	0	1.08653	0	0	0	0	1.75069	1.98963	2.25762
F2S4_160219_003_F01	122	#6C8581	Oligo Serpinb1a	3	#808285	Non-Neuronal	2.10693	0	0	2.9857	0	0	0	0	0	0	2.54409	2.61407	3.04057	2.60683	0	0	0	0	0.329028	1.22698	2.85836	1.00283	0	0	0	0	0	0	1.37408	0	0	0.514065	1.92868	1.57126
F2S4_160219_003_H01	122	#6C8581	Oligo Serpinb1a	3	#808285	Non-Neuronal	0	0	0	2.57578	0	0	0	0	0	0	2.70235	0	2.94963	2.19642	0	0	0	0	2.1479	2.25368	2.59331	0	0	0	0	0	0	0	0	0	0	0	1.64543	2.76285
F2S4_160219_010_A01	118	#665C47	Astro Aqp4	3	#808285	Non-Neuronal	0	0	0	2.06448	2.55552	0	0	0	1.6128	0	2.20685	0	3.03451	1.83039	0	0	2.57134	0	2.72783	1.44198	1.51412	0	0	0	0	0	2.23302	2.29228	0	0	2.36049	2.32772	1.35541	0
F2S4_160219_010_B01	118	#665C47	Astro Aqp4	3	#808285	Non-Neuronal	0	0	0	2.28076	0	0	0	0	2.42397	0	2.75938	0	2.45078	0.299757	0	2.30922	2.59625	0	0	1.45994	2.07665	0	0.900859	0	1.94196	0	2.0428	1.6696	0	0	1.7135	0	1.90057	1.78282
F2S4_160219_010_D01	119	#476655	OPC Pdgfra Grm5	3	#808285	Non-Neuronal	2.80347	0	0	2.30995	0	0	0	0	0	0	2.95436	0.584471	2.53755	1.74023	0	0	0	0	2.67973	2.53755	2.60227	0	3.03198	0	0	1.98309	0	1.866	1.44703	2.35307	0	0	1.48902	2.57524
F2S4_160219_010_G01	123	#476662	Oligo Synpr	3	#808285	Non-Neuronal	1.68461	0	0	2.81653	1.11997	0	0	0	0	0	3.08244	0	3.23381	1.86976	1.47858	0	0	1.28494	2.54517	1.56666	2.68926	0	0.224472	0	0	0	0	0	0	0.224472	0	2.56322	1.2366	2.41868
F2S4_160219_010_H01	119	#476655	OPC Pdgfra Grm5	3	#808285	Non-Neuronal	2.23489	0	0	2.17726	0	0	0	0	0	0	2.85646	0	2.5597	1.57506	2.5799	0	0	0	1.59793	1.43815	2.55357	0	3.1773	0	0	1.32893	0	1.73119	0	0	1.52535	2.56574	2.11758	2.87095
F2S4_160219_011_B01	133	#598069	Microglia Siglech	3	#808285	Non-Neuronal	2.7692	0	0.262158	2.12311	1.2449	0	0	0	0	0	2.67294	0	2.13382	0	0	2.03968	3.44038	0	2.64369	0.967905	0	0	2.88841	0	0	0	0.262158	0	0	0	0	2.14427	2.02634	2.88514
F2S4_160219_011_E01	133	#598069	Microglia Siglech	3	#808285	Non-Neuronal	3.16376	0	0	2.23204	0	0	0	0	0	0	3.0604	0	2.59951	0	0	0	3.61054	1.90863	2.38059	0	1.92689	0	2.19749	0	0	0	0	2.37902	0	0	2.24297	0	1.26475	2.29385
F2S4_160219_011_H01	119	#476655	OPC Pdgfra Grm5	3	#808285	Non-Neuronal	1.79787	0	0	1.92684	2.45721	0	0	0	2.12633	0	2.98993	0	2.834	1.91377	2.22959	0	0.263628	0	2.48657	1.92253	2.15262	0	2.81554	0	0	0	0	0.885346	0	2.24015	2.24223	1.40164	2.12633	2.40196
F2S4_160225_002_D01	130	#997F7A	Endo Ctla2a	4	#8D1800	Endothelial	2.40705	0	0	0	0	0	0	0	0	0	0	0.379711	2.44568	0	0	0	3.20264	0	0	0	2.30878	0	0	0	1.61826	0	0	0	0	0	0	2.88104	1.95962	0
F2S4_160225_002_E01	121	#6B998D	Oligo Rassf10	3	#808285	Non-Neuronal	2.22963	0	0	2.21518	0.303211	1.79316	0	0	0	0	3.23146	0.547181	2.98184	1.29416	0	1.45135	0	1.04535	2.60149	1.38438	2.4168	0	0	0	0	0.303211	0	0.547181	0	2.08889	0	2.32239	2.35555	2.57953
F2S4_160225_002_F01	130	#997F7A	Endo Ctla2a	4	#8D1800	Endothelial	2.44898	0	0	2.3154	0	0	0	0	0	0	2.87799	0	3.01739	0	0	0	3.66116	0	0	0	0	0	0	0	0	0	0	0	0	0	0	1.63776	0	0
F2S4_160225_002_G01	123	#476662	Oligo Synpr	3	#808285	Non-Neuronal	1.48047	0	0	2.67942	0	0	0	0	0	0	2.79042	1.75343	2.82613	2.01317	0	0	2.8077	1.37541	2.36908	2.14096	2.4263	1.73528	0	0	0	1.33074	0	1.01199	0	1.51258	1.67578	1.55948	1.4936	2.44767
F2S4_160225_002_H01	123	#476662	Oligo Synpr	3	#808285	Non-Neuronal	1.97093	0	0	2.53855	2.37909	0.918695	0	0	0	0	2.99766	2.2467	2.82407	2.16823	0.163099	0.744913	1.79926	1.19272	2.42234	1.69297	2.34199	0	0	0	0	0.450737	0	1.72767	1.55194	1.35068	1.49251	2.10311	1.53495	1.7865
F2S4_160225_003_A01	130	#997F7A	Endo Ctla2a	4	#8D1800	Endothelial	2.19379	0	0	2.47375	0	0	0	0	0	0	3.17396	0	2.40164	1.45633	0	0	3.66486	0	0	2.10704	2.36315	1.99552	0	0	2.66518	0	0	0	0	0	0	0.967519	0	2.80234
F2S4_160225_003_B01	130	#997F7A	Endo Ctla2a	4	#8D1800	Endothelial	2.76134	0	0	2.56371	0	0	0	0	0	0	3.04092	0	2.92654	2.41858	0.242626	0	2.92961	0	2.54093	0	2.55292	0	0	0	0	0	0	0	0	0	0	2.37835	2.30116	2.67367
F2S4_160225_003_D01	130	#997F7A	Endo Ctla2a	4	#8D1800	Endothelial	3.0096	0	0	2.48545	0	0	0	0	0	0	2.60889	0	2.26979	2.29334	0	0	3.51009	0	0	0	2.14064	0	0	0	2.0134	0	0	0	0	0	0	0	2.10947	2.24881
F2S4_160225_003_E01	130	#997F7A	Endo Ctla2a	4	#8D1800	Endothelial	3.14776	0	0	2.31723	2.02486	0	0	0	0	0	3.19535	0	2.87864	1.90215	0	0	3.33963	0	2.32774	0	2.49924	0	0	0	1.5783	0	0	0.463461	0	1.97226	0	2.84997	2.0901	1.93221
F2S4_160225_003_F01	130	#997F7A	Endo Ctla2a	4	#8D1800	Endothelial	2.61005	0	0	1.27765	0	0	0	0	0	0	2.95252	0	2.39448	2.46937	0	0	3.1588	0	0	2.25652	2.44094	0	0	0	2.9155	0	2.3752	2.09269	0	0	0	0	0	1.74487
F2S4_160225_003_G01	130	#997F7A	Endo Ctla2a	4	#8D1800	Endothelial	2.77632	0	0	2.04978	0	0	0	0	0	0	2.40722	0	2.94156	2.23093	0	0	3.41403	0	0	0	1.8862	0	0	0	3.128	0	0	0	0	0	0	1.91972	2.38126	3.00642
F2S4_160225_004_A01	123	#476662	Oligo Synpr	3	#808285	Non-Neuronal	1.71122	0	0	2.45538	1.73614	1.70083	0	0	0	0	2.59023	2.09249	2.77023	1.94392	0.606163	1.28393	0	1.00492	2.47261	1.79496	2.19966	0	0.206177	0	0	0	0	1.09845	0	0	0.345411	2.29636	1.33562	2.47527
F2S4_160225_004_G01	123	#476662	Oligo Synpr	3	#808285	Non-Neuronal	2.29837	0	0	2.62094	0.645598	0	0	0	0	0	3.02742	1.79175	2.95732	1.74623	1.33306	1.54676	0	0.708093	2.58615	1.81054	2.27059	1.62388	0	0	0	0	0	1.51162	0	1.71301	0	2.32448	1.57137	1.74623
F2S4_160225_005_B01	123	#476662	Oligo Synpr	3	#808285	Non-Neuronal	2.14178	0	0	2.57026	1.39856	0	0	0	0	0	3.03998	0.663266	2.94067	1.36611	0	0	0	1.15289	2.24517	1.83823	2.44219	0	0	0	0	0	0	0	0	0.845655	0	1.45699	1.93615	2.32493
F2S4_160225_005_D01	130	#997F7A	Endo Ctla2a	4	#8D1800	Endothelial	0.59791	0	0	2.5779	0	0	0	0	0	0	2.73813	0	2.79861	0	0	0	2.9535	1.73016	2.13563	1.96207	2.22545	0	0	0	2.92111	1.63407	0	0	0	2.61875	0	0	1.80072	3.10276
F2S4_160225_005_F01	121	#6B998D	Oligo Rassf10	3	#808285	Non-Neuronal	1.70185	0	0	2.52196	0	0	0	0	0	0	3.21916	1.50845	3.05608	1.56383	1.8138	0	0	1.05746	2.29978	1.66741	2.59431	0	0	0	0	0	0	1.75519	0	1.43633	0	2.43158	2.2055	2.47114
F2S4_160225_005_H01	123	#476662	Oligo Synpr	3	#808285	Non-Neuronal	2.28217	0	0	2.60862	2.16966	0	0	0	0	0	3.1578	0	2.97573	1.97317	1.26409	1.78896	0	1.54627	2.52786	1.80066	2.53714	1.35891	0	0	0	1.33708	0	1.30211	0	0	0	2.24781	1.96796	2.18898
F2S4_160225_006_A01	130	#997F7A	Endo Ctla2a	4	#8D1800	Endothelial	2.69321	0	0	2.36568	0	0	0	0	0	0	3.08713	0	2.96044	1.20684	0	0	3.16878	1.31589	0	0	2.09721	0	0	0	2.088	0	0	0	0	0	2.43271	0	1.6202	1.41412
F2S4_160225_006_D01	128	#665547	Peri Kcnj8	4	#8D1800	Endothelial	2.91862	0	0	1.99441	0	0	0	0	0	0	3.31856	0	0.496911	1.98167	0	0	0	0	1.95502	0	2.62441	0	0.496911	0	0	0	0	0	0	0	0	2.66107	2.49116	2.32073
F2S4_160225_006_E01	130	#997F7A	Endo Ctla2a	4	#8D1800	Endothelial	2.2826	0	0	2.61629	0	0	3.08382	0	0	0	3.36191	0	2.81348	1.68728	0	0	3.38631	1.75615	0	2.74664	0.263957	0	0	0	0	0	0	0	0	0	0	0	1.96848	2.71352
F2S4_160225_006_G01	130	#997F7A	Endo Ctla2a	4	#8D1800	Endothelial	2.98327	0	0	2.56742	0	0	0	0	0	0	0	0	2.50169	1.79281	0	0	3.28835	0	0	0	2.44518	0	0	0	3.08527	0	0	0	0	0	0	0	0	2.59363
F2S4_160225_007_C01	130	#997F7A	Endo Ctla2a	4	#8D1800	Endothelial	2.30852	0	0	2.45445	0	0	0	0	0	0	2.70162	0	2.37136	0	2.39488	0	3.42803	0	0	0	2.40323	0	0	0	0.764989	0	0	2.29204	0	0	0	0	2.08466	0
F2S4_160225_007_D01	122	#6C8581	Oligo Serpinb1a	3	#808285	Non-Neuronal	0.796584	0	0	2.8274	0	0	0	0	0	0	2.12223	0	2.89474	2.50565	0	0	0	0	2.60126	0	3.08254	0	0	0	0	0	0	0	0	2.85922	0	1.26205	2.22485	0
F2S4_160225_007_G01	128	#665547	Peri Kcnj8	4	#8D1800	Endothelial	0.924014	0	0	2.20208	0	0	0	0	0	0	0.839849	0	0.507648	2.36635	0	0	2.83194	0	0	0	2.91829	0	2.36358	0	0	0	0	0	0	0	0	0	0	2.56209
F2S4_160225_008_B01	133	#598069	Microglia Siglech	3	#808285	Non-Neuronal	2.9461	0	0	1.99763	0	0	0	0	0	0	2.6485	0	2.56652	0.878737	0.937403	0	3.43632	0	2.03206	0.846137	0	0	2.75242	0	0	1.82014	1.38952	1.07699	0	0	2.13735	2.47263	2.1642	2.73528
F2S4_160225_008_C01	130	#997F7A	Endo Ctla2a	4	#8D1800	Endothelial	2.82496	0	0	0	0	0	0	0	0	0	0	0	2.37177	0	0	0	3.10407	0	0	1.81822	2.49305	0	0	0	3.39648	0	0	0	0	0	0	0	2.26242	0
F2S4_160225_008_E01	119	#476655	OPC Pdgfra Grm5	3	#808285	Non-Neuronal	0	0	0	0	1.6739	0	0	0	0	0	2.27465	0	3.20763	2.1025	0	0	0	0	1.93499	0	2.27465	0	2.87872	0	2.45556	0	0	0	0	0	2.67754	0	2.16215	2.53837
F2S4_160225_008_G01	118	#665C47	Astro Aqp4	3	#808285	Non-Neuronal	0.242581	0	0	2.16031	0	2.09498	0	0	2.66802	0	0	0	2.63991	2.01178	0	0	0.242581	0	2.24568	0	0	0	2.18646	0	2.02117	0	0	2.28281	0	0	0	0	0	2.774
F2S4_160225_009_B01	130	#997F7A	Endo Ctla2a	4	#8D1800	Endothelial	2.36755	0	0	2.57894	2.9539	0	0	0	0	0	0.930828	1.60767	2.82221	0.211468	0	0	3.24519	0	2.51813	1.73995	2.61807	0	0	0	0	0	0	0	0	0	0	2.68317	2.07759	2.19471
F2S4_160225_009_C01	122	#6C8581	Oligo Serpinb1a	3	#808285	Non-Neuronal	0	0	0	2.86652	0	0	0	0	0	0	2.61187	1.3117	3.10832	2.39779	0	0	3.45784	2.05723	0.21746	1.36355	2.90716	2.44484	0	0	0	1.93846	0	0	0	0	0	2.68416	2.52173	2.95635
F2S4_160225_009_D01	119	#476655	OPC Pdgfra Grm5	3	#808285	Non-Neuronal	2.51725	0	0	1.98219	0	1.22609	0	0	0	0	2.6536	0	2.94297	0	0	1.77118	0	0	1.97416	0.95013	2.15141	0	1.60827	0	0	0	0	0	0	2.51023	0	0	2.69096	1.42332
F2S4_160225_009_E01	118	#665C47	Astro Aqp4	3	#808285	Non-Neuronal	0	0	0	2.07197	2.13685	0	0	0	2.80832	0	2.69241	2.3256	2.77604	2.37653	0	0	2.49799	0	2.32859	0	2.4245	0	2.50201	0	1.55759	0	0	2.33156	0	2.22468	0	0	2.02362	0
F2S4_160225_009_F01	118	#665C47	Astro Aqp4	3	#808285	Non-Neuronal	0	0	0	0	0	0	0	0	2.89335	0	2.97135	0	2.79704	2.53564	0	0	3.12922	0	0	0	2.24324	0	2.79353	0	0.265045	0	0	0	0	0.265045	0	2.62995	1.68962	2.08069
F2S4_160225_009_G01	118	#665C47	Astro Aqp4	3	#808285	Non-Neuronal	2.73114	0	0	1.51895	0	0	0	0	2.97629	0	2.66624	0	0.276417	0	0	1.86902	2.17233	1.09925	2.62335	0	2.48727	0	1.87935	0	0	0	0	0	2.01794	0	0	0.276417	0	1.57382
F2S4_160225_010_A01	118	#665C47	Astro Aqp4	3	#808285	Non-Neuronal	0	0	0	0.219065	2.4687	2.40409	0	0	1.68335	0	2.24912	2.62005	2.67275	0	0	0	3.14233	0	2.35413	0	2.29335	0	2.30196	0	0.79575	0	0	0	0	0	0	0	1.44555	0
F2S4_160225_010_C01	133	#598069	Microglia Siglech	3	#808285	Non-Neuronal	3.13428	0	0	1.70278	0	0	0	0	0	0	0	0	2.86874	0.332393	0	0	2.60452	0	3.05838	0	2.63217	0	1.83051	0	0	0	0	0	0	0	1.92908	0	2.08539	0
F2S4_160225_010_D01	121	#6B998D	Oligo Rassf10	3	#808285	Non-Neuronal	2.72215	0	0	1.99266	2.37748	0	0	0	0	0	2.88082	2.56326	2.80537	1.25861	0	0.207392	0	1.00781	2.31783	2.71298	2.81565	0	2.56034	0	0	0	0	1.92869	0	2.10621	0	1.63584	2.48373	2.39389
F2S4_160225_010_E01	122	#6C8581	Oligo Serpinb1a	3	#808285	Non-Neuronal	0	0	0	2.85681	0	0	0	0	0	0	2.31071	0	3.19606	2.31565	0	0	0	0	2.58239	0.754225	3.02493	0	0	0	0	0	0	0	0	0	2.25609	0.981231	2.52367	2.26721
F2S4_160225_010_F01	118	#665C47	Astro Aqp4	3	#808285	Non-Neuronal	0	0	0	2.05918	0	0	0	0	1.2953	0	0	0	0	2.06797	2.02214	0	0	0	2.39872	0	2.38844	0	2.01728	0	1.85289	0	0	0	1.90653	2.69582	1.24044	0	0	3.0458
F2S4_160225_010_H01	133	#598069	Microglia Siglech	3	#808285	Non-Neuronal	2.55502	0	0	2.26536	0	0	0.314983	0	0	0	3.06047	0	0.622825	0	0	0	3.1927	0	0	0	0.314983	0	2.08794	0	0	0	0	0	0	1.61785	2.81982	0	2.21199	0.314983
F2S4_160225_011_A01	118	#665C47	Astro Aqp4	3	#808285	Non-Neuronal	0	0	0	2.0962	0	0	0	0	0.618887	0	2.3415	0	2.74669	1.79863	2.4149	0	3.10785	0	2.26372	1.40879	2.02726	0	1.40879	0	0.212615	0	0	0	0	2.58832	1.15423	0	2.07595	2.34025
F2S4_160225_011_B01	118	#665C47	Astro Aqp4	3	#808285	Non-Neuronal	0	0	0	2.14286	0	0	0	0	2.95574	0	2.87075	0	2.9339	0	2.5649	0	2.80145	0	2.51685	0	2.67598	0	0	0	0	0	0	1.38757	0	0	0	0	0	0
F2S4_160225_011_C01	130	#997F7A	Endo Ctla2a	4	#8D1800	Endothelial	2.63212	0	0	2.57848	0	0	0	0	0	0	3.12811	0	2.93332	2.27631	0	0	3.51246	0	0	2.77186	2.49294	0	0	0	0	0	0	0	1.54243	0	0	0	0	2.12651
F2S4_160225_011_D01	133	#598069	Microglia Siglech	3	#808285	Non-Neuronal	3.16696	0	0	0	0	0	0	0	0	0	3.00449	3.24306	2.63158	0	0	0	2.32804	0	0	2.40767	1.05759	0	2.90168	0	0	0	0	0	0	0	0	0	2.34427	0
F2S4_160225_011_E01	122	#6C8581	Oligo Serpinb1a	3	#808285	Non-Neuronal	0	0	0	2.49538	0	0	0	0	0	0	2.4348	0	3.15628	2.64986	0	0	0	1.49902	2.61775	0.549734	2.62437	0	0	0	0	0	0	1.85134	0	0	0	1.74615	1.80193	1.79311
F2S4_160225_011_F01	133	#598069	Microglia Siglech	3	#808285	Non-Neuronal	3.31679	0	0	1.03928	0	0	0	0	0	0	0	0	2.94216	0	0	0	2.46307	0	2.31991	2.69141	2.06589	0	0.299871	0	0	0	0	2.73884	0	0	0	0	2.5162	0
F2S4_160225_011_G01	132	#4C6647	PVM Mrc1	3	#808285	Non-Neuronal	2.51092	0	2.33904	2.45695	0	2.04582	0	0	0	0	2.67585	0	2.49967	0	0	0	4.07351	0.658249	2.0877	1.54094	1.16488	1.87168	0	0	0	0	0	0	0	2.18684	0	2.11813	1.42258	2.31357
F2S4_160225_011_H01	122	#6C8581	Oligo Serpinb1a	3	#808285	Non-Neuronal	2.58529	0	0	2.95963	2.17231	0	0	0	0	0	0	0	2.90427	2.15439	0	2.68448	0	0	2.90659	0.981689	2.81016	0	0	0	0	0	0	0	0	0	0	0	2.34742	0
F2S4_160316_001_A01	133	#598069	Microglia Siglech	3	#808285	Non-Neuronal	2.83391	0	0	2.18108	0	0	0	0	0	0	2.8689	2.11392	2.65629	0	0	2.26733	3.30252	0	1.91083	1.64817	1.76529	0	2.3576	0	0	0	0	1.99489	0	0	0	2.21306	2.01663	2.48378
F2S4_160316_001_B01	130	#997F7A	Endo Ctla2a	4	#8D1800	Endothelial	2.8511	0	0	2.77155	0	0	0	0	0	0	2.53933	0	2.87759	0	0	0	3.24425	0	0	0	2.59729	0	0	0	1.89394	0	0	0	0	0	0	0	2.52716	2.52921
F2S4_160316_001_C01	118	#665C47	Astro Aqp4	3	#808285	Non-Neuronal	0	0	0	0	0	0	0	0	2.92385	0	2.41474	0	0	0	0	0	2.65526	0	2.7022	0	2.57274	0	2.66082	0	2.45331	0	0	0	0	0	1.37057	0	1.7141	0
F2S4_160316_001_E01	130	#997F7A	Endo Ctla2a	4	#8D1800	Endothelial	2.79765	0	0	2.17551	0	0	0	0	0	0	3.15985	0	2.85712	0	2.51405	2.28594	2.78118	1.2941	0	0	2.71555	0	0.222004	0	0	0	0	0	0	0	0	0	1.62017	2.79114
F2S4_160316_001_F01	118	#665C47	Astro Aqp4	3	#808285	Non-Neuronal	0	0	0	0	0	0	0	0	2.95359	0	2.92361	0	0	0.257717	0	0	0	0	2.48171	0	2.2745	0	0	0	0	0	2.44416	1.76126	0	0	0	0	1.32744	2.63222
F2S4_160316_001_H01	122	#6C8581	Oligo Serpinb1a	3	#808285	Non-Neuronal	2.14945	0	0	2.76719	0.202362	0	0	0	0	0	2.84521	0	3.19681	1.06758	0	0	3.55861	1.02105	2.90593	2.35629	2.24281	0	0	0	0	0	0	0	0	2.3859	2.22475	0	0.995769	2.60512
F2S4_160316_003_D01	133	#598069	Microglia Siglech	3	#808285	Non-Neuronal	2.83716	0	0	0	0	0	0	0	0	0	2.52821	0	2.60312	0	0	0	3.2852	0	0	0	2.04905	0	2.27625	0	0	0	0	0	0	0	0	2.26795	2.52241	0
F2S4_160316_003_E01	118	#665C47	Astro Aqp4	3	#808285	Non-Neuronal	0	0	0	0	1.61778	0.791626	0	0	2.92992	0	2.24648	2.1892	2.35251	1.31636	0	0	0.968601	0	2.58662	0	2.31707	0	3.24987	0	3.2056	0	0	0	0	0	0	0	0	0.309165
F2S4_160316_003_F01	118	#665C47	Astro Aqp4	3	#808285	Non-Neuronal	0	0	0	2.09276	0	0	0	0	3.07488	0	2.93911	0	2.40674	0.611679	0	0	0	0	0	0	2.20443	0	1.6063	0	1.6063	0	0	0	0	0	0	1.64595	1.66812	0
F2S4_160316_003_H01	122	#6C8581	Oligo Serpinb1a	3	#808285	Non-Neuronal	1.91348	0	0	2.46083	0	0	0	0	0	0	2.59684	0	3.04247	2.43439	0	0	0	0	2.40341	2.12251	2.71755	0	0	0	0	0	0	2.01916	0	0	1.53193	2.49504	2.15382	0.633825
F2S4_160316_004_A01	128	#665547	Peri Kcnj8	4	#8D1800	Endothelial	2.51114	0	0	1.47073	0	0	0	0	0	0	3.07179	0	2.6121	0	0	2.84915	2.27014	0	0	0	1.93795	0	0	0	0	0	0	0	0	0	0	0	0.24845	0
F2S4_160316_004_C01	122	#6C8581	Oligo Serpinb1a	3	#808285	Non-Neuronal	0	0	0	2.80772	0	0	0	0	0	0	2.97128	0.5801	2.9051	0	0	0	0	1.33727	2.51487	2.49352	2.46777	0	0	0	0	0.998646	0	0.193279	0	0	0	0	0.998646	2.78675
F2S4_160316_004_E01	118	#665C47	Astro Aqp4	3	#808285	Non-Neuronal	0	0	0	2.36128	0	0	0	0	2.76568	0	2.66289	0	2.10415	1.94993	2.59977	0	2.65597	0.417753	2.48536	0	2.46779	0	2.92011	0	1.30964	0	0.767162	0	0	0	0	2.06365	0	2.24253
F2S4_160316_004_F01	122	#6C8581	Oligo Serpinb1a	3	#808285	Non-Neuronal	0	0	0	3.03908	0	0	0	0	0	0	0	0	3.44014	2.36777	0	0	3.32006	1.28798	1.89697	0.719994	2.66054	0	0	0	0	0.583426	0	0	0	2.57218	1.86039	0	2.02732	1.1807
F2S4_160316_004_G01	118	#665C47	Astro Aqp4	3	#808285	Non-Neuronal	2.32441	0	0	2.3918	0	0	0	0	2.53806	0	0	0	2.20532	0	1.92695	0	0.26567	0	2.74778	0	2.24875	0	1.86659	0	0.839182	1.88607	0	0	0	0	0	0	0	0
F2S4_160316_004_H01	119	#476655	OPC Pdgfra Grm5	3	#808285	Non-Neuronal	0	0	0	0	0	0	0	0	0	0	3.1555	0	3.02431	0	0	0	0	0	0.302179	0.302179	0.302179	0	2.29675	0	0	0	0	0	1.23261	0	0.700807	0	0	2.68624
F2S4_160421_007_A01	121	#6B998D	Oligo Rassf10	3	#808285	Non-Neuronal	2.26094	0	0	2.21822	0	2.05006	0	0	0	0	3.2117	0	2.91681	1.89239	0	2.07995	0	0	2.73327	2.2661	2.74677	0.13464	0.389842	0	0	1.25725	0	1.82231	0	0	1.49369	2.47254	2.40477	1.13738
F2S4_160421_012_B01	118	#665C47	Astro Aqp4	3	#808285	Non-Neuronal	1.72855	0	0	2.36139	2.49483	0	0	0	0.451313	0	3.07783	0	2.6287	1.62434	0	0	2.28926	0.622949	2.44083	0	2.32448	0	2.3169	0	0	0	0	0	0	0	0	0	1.04328	0
F2S4_160421_012_E01	118	#665C47	Astro Aqp4	3	#808285	Non-Neuronal	1.8898	0	0	2.1662	0.479361	0	2.32968	0	2.58141	0	2.92243	0	2.32452	1.68453	2.45895	0	3.07908	1.00302	0	0.399956	2.23251	0	2.24885	0	2.44895	0.932381	1.82938	0	0	0	0	2.12555	0	1.79569
F2S4_160425_005_F01	118	#665C47	Astro Aqp4	3	#808285	Non-Neuronal	0	0	0	1.84573	0	0	0	0	2.85048	0	2.79283	0.748718	2.98061	0.197516	0	2.24281	2.44312	0	2.67293	1.42058	2.5083	0	1.9527	0	0.898191	0	0	0.791178	1.31343	0	0	2.18313	1.17086	0
F2S4_160505_028_F01	133	#598069	Microglia Siglech	3	#808285	Non-Neuronal	3.17335	0	0	2.3878	0	2.57292	0	0	0	0	2.9592	1.00769	2.81557	0	0	0	3.62402	0	2.6514	0.218959	2.16984	0	0.838882	0	0	0	0	2.27532	0	2.43315	0	2.4027	2.50731	0
F2S4_160505_030_A01	133	#598069	Microglia Siglech	3	#808285	Non-Neuronal	3.43774	0	0	2.65433	0	0	0	0	0	0	2.95287	0	2.68468	1.59115	0	0	3.68876	1.04516	2.09318	0	1.91884	0	1.76794	0	0	0	0	0	0	0	0.969147	2.45826	2.71256	2.62598
F2S4_160505_030_B01	133	#598069	Microglia Siglech	3	#808285	Non-Neuronal	3.09292	0	0	1.9309	0	2.12186	0	0	0	0	3.0651	0	2.81161	1.44364	0	2.13783	3.60797	0	2.19914	0	1.76357	0	1.99856	0	0	0	0	0	0	1.85973	0	2.49674	1.89127	2.61702
F2S4_160517_008_G01	120	#475D4B	OPC Pdgfra Ccnb1	3	#808285	Non-Neuronal	1.8855	0	2.6476	1.84198	2.6863	0.668669	0	0	0	0	2.89703	0	2.33816	1.3327	2.17315	2.04776	0	0.836378	2.16014	0.97428	2.2412	2.09112	2.53869	0	1.66328	0.732043	1.25164	0	1.64566	1.98828	1.85104	2.27203	1.7244	2.6501
F2S4_160517_017_F01	123	#476662	Oligo Synpr	3	#808285	Non-Neuronal	1.97659	0	0	2.6213	0	0	0	0	0	0	2.91157	0	2.86753	2.267	0	1.85318	0	0.866646	2.4621	1.44736	1.99267	1.75294	0	0	0	0	0	1.3435	0	1.82828	0.696579	2.37104	1.58815	2.48416
F2S4_160518_004_B01	118	#665C47	Astro Aqp4	3	#808285	Non-Neuronal	0	0	0	0	0	0	0	0	0.902283	0	2.84511	1.02035	2.82645	1.14527	0	0	0	0	2.72986	0.601368	0	0	2.74688	0	0	1.72337	0	0	1.18947	0	0	0	0	2.57772
F2S4_160523_002_A01	118	#665C47	Astro Aqp4	3	#808285	Non-Neuronal	2.48066	0	0	2.34493	0	0	0	0	0	0	2.41958	0	2.73134	0.811082	0.942153	0	3.24809	0	2.42109	1.5791	2.51405	0	1.06029	0	0	0	2.37934	1.55218	0	2.48131	0	2.51405	2.36419	1.70509
F2S4_160523_003_G01	118	#665C47	Astro Aqp4	3	#808285	Non-Neuronal	2.3744	0	0	0	0	0	0	0	0	0	3.07911	0	2.73684	0	0	0	2.7816	0	2.53346	0	2.60172	2.61173	1.70205	0	1.09748	0	0	0	0	0	0	0	2.28665	2.41836
F2S4_160523_007_B01	118	#665C47	Astro Aqp4	3	#808285	Non-Neuronal	0	0	0	2.23355	0	0	0	0	2.40268	0	2.6137	0	2.65045	1.88985	0	0	2.87633	1.15951	2.66542	0	2.49085	0	2.25893	0	0.160751	0	0	0	1.39342	0	0	0	0	2.41632
F2S4_160523_007_E01	118	#665C47	Astro Aqp4	3	#808285	Non-Neuronal	0	0	0	2.07203	0	0	0	0	3.1916	0	3.10945	0	2.73241	0	0	2.34241	2.67301	0	0	2.06865	2.39744	0	1.02535	0	0.51666	0	0	0	0	0	0.746002	2.74402	1.51856	2.02029
F2S4_160523_008_C01	118	#665C47	Astro Aqp4	3	#808285	Non-Neuronal	0	0	0	2.25515	0	0	0	0	2.33809	0	0	0	2.90427	1.7916	0	0	2.86781	0	2.17249	0.241179	2.49121	0	1.57268	0	0	0	1.94752	0	0	0	0	0	0	0.241179
F2S4_160523_009_A01	118	#665C47	Astro Aqp4	3	#808285	Non-Neuronal	0	0	0	1.76449	0	0	0	0	0	0	3.17809	0	2.55697	2.15792	0.654795	0	2.44529	0	1.71956	0	2.1632	0	2.68015	0	0	0	0	0	0	0	0	2.46991	1.9178	0
F2S4_160523_010_B01	132	#4C6647	PVM Mrc1	3	#808285	Non-Neuronal	3.10189	0	3.00693	2.63981	0.981907	1.10941	0	0	0	0	2.94258	0	2.91235	0	0	0	4.002	1.0342	2.10386	0	1.99108	2.05191	2.07792	0	0	1.39323	2.36885	0	0	1.88009	0	2.41563	2.28346	2.49465
F2S4_160523_012_C01	118	#665C47	Astro Aqp4	3	#808285	Non-Neuronal	0	0	0	1.4105	0	0	0	0	1.34492	0	2.49016	0	2.44439	0	0	0	3.05208	0	1.46747	0	1.932	0	1.30245	0	0	0	2.37663	2.19053	0	0	1.20258	2.53679	1.55678	2.44035
F2S4_160523_012_D01	118	#665C47	Astro Aqp4	3	#808285	Non-Neuronal	2.38255	0	0	2.56918	0	0	0	0	2.84761	0	2.30077	0	0.170716	0	0	0	2.6374	0	2.20779	0	2.5874	0	2.26706	0	0	0	0	1.33659	0	1.56389	0	1.91583	2.17411	2.4841
F2S4_160525_001_A01	132	#4C6647	PVM Mrc1	3	#808285	Non-Neuronal	2.91719	0	2.93692	2.39538	0	2.11577	0	0	0	0	2.90885	0	2.47896	0	0	1.85042	3.79458	0	2.19568	0	2.06349	0	0	0	0	1.93047	0	0	0	2.108	0	0.378036	2.07884	2.2418
F2S4_160525_001_B01	118	#665C47	Astro Aqp4	3	#808285	Non-Neuronal	0	0	0	2.00556	0	2.22569	0	0	2.33851	0	2.5383	2.56231	3.02818	0	0.761603	0	2.53089	0.952282	2.29637	1.48735	2.02557	0	1.41396	0	0.314133	0	0	0	0	0	0	0	0	0
F2S4_160525_001_C01	118	#665C47	Astro Aqp4	3	#808285	Non-Neuronal	0	0	0	2.48242	2.2503	0	0	0	2.83896	0	3.09615	0	2.77685	0	1.55539	0	0	0	2.75028	0	2.25172	0	1.32986	0	0	1.85389	0.335288	0	1.20774	0.705397	0	1.80526	0.833834	2.5214
F2S4_160525_001_F01	118	#665C47	Astro Aqp4	3	#808285	Non-Neuronal	0	0	0	2.20961	0	0	0	0	2.41576	0	2.72607	0	2.55002	1.43632	0	0	3.00969	0	2.70561	1.52713	2.29837	0	2.29837	0	0	0	2.11489	0	0	1.05817	0	0	1.81265	0
F2S4_160525_001_G01	118	#665C47	Astro Aqp4	3	#808285	Non-Neuronal	0	0	0	2.15979	0	1.86641	0	0	1.75851	0	2.3618	0	2.77355	0	0	0	3.03612	0.615988	2.4146	1.16331	2.30168	0	2.19299	0	0	0	0.489524	0	0	0	0	0	0	0
F2S4_160525_002_D01	132	#4C6647	PVM Mrc1	3	#808285	Non-Neuronal	3.22717	0	3.10223	2.5479	0	0	0	0	0	0	0	0	2.90686	0	0	2.47146	3.89983	0	0	1.92396	1.59846	2.07941	0.549505	0	0	1.60946	0	0	0	2.28402	0	0	2.43326	2.17338
F2S4_160525_005_B01	118	#665C47	Astro Aqp4	3	#808285	Non-Neuronal	0	0	0	1.75356	2.29281	0	0	0	2.39369	0	2.56773	0	1.95359	0.211068	0	0	3.10641	0	2.61241	1.64523	2.58644	0	2.42646	0	1.44575	0	0	2.04096	0	2.0878	0	0	0	2.17411
F2S4_160525_005_D01	118	#665C47	Astro Aqp4	3	#808285	Non-Neuronal	0	0	0	2.28601	0	0	0	0	2.4876	0	2.35539	0	2.26019	0.433946	0	0	2.96781	0.269058	2.68569	0	2.09237	0	2.496	0	0	0	2.21264	0	0	0	0	0	1.33432	2.12987
F2S4_160525_005_G01	123	#476662	Oligo Synpr	3	#808285	Non-Neuronal	1.79647	0	0	2.58139	0.908803	0	0	0	0	0	2.83332	1.37546	2.8059	1.77971	1.39246	1.29992	2.14108	1.51508	2.45521	1.91385	2.4238	0	0	0	0	0.5846	0	1.75871	0.978962	1.67165	1.80299	2.10059	1.43979	2.24737
F2S4_160525_005_H01	132	#4C6647	PVM Mrc1	3	#808285	Non-Neuronal	3.24092	0	2.70399	2.21948	0	0	0	0	0	0	2.82241	0	2.37245	1.94	0	0	3.91296	1.41121	1.96403	0	2.39901	0	1.82786	0	0	1.82786	0	0	0	0	0	2.11339	1.9369	2.87605
F2S4_160525_006_H01	118	#665C47	Astro Aqp4	3	#808285	Non-Neuronal	0	0	0	2.17869	0	0	0	0	2.43317	0	2.77361	1.36298	2.14925	1.98961	0	0	3.07732	0.801158	2.50697	0	2.1895	0	0.516238	0	1.64711	0	2.20214	0	0	0	0	2.39497	0	2.38419
F2S4_160525_008_C01	118	#665C47	Astro Aqp4	3	#808285	Non-Neuronal	0	0	0	2.27223	0	0.445616	0	0	2.78122	0	2.42477	0	2.17486	1.5763	0	0	2.42036	0	2.46919	2.47444	1.93464	0	2.77539	0	0	0	0	0	1.54421	0	0	0	1.43066	0
F2S4_160525_009_E01	118	#665C47	Astro Aqp4	3	#808285	Non-Neuronal	0	0	0	1.83942	0.31823	0	0	0	3.1647	0	2.92636	0	2.94165	0	0	0	2.68301	1.14518	2.73525	0	2.25886	0	0.627612	0	0.31823	0	0	0	1.50978	0	0	0	0	0
F2S4_160525_010_B01	118	#665C47	Astro Aqp4	3	#808285	Non-Neuronal	0	0	0	2.72816	0	0	0	0	2.78375	0	1.44874	0	2.69515	2.10286	0	0	2.45227	0	0	0	2.64038	0	2.15848	0	1.72997	0	0	0	0	0	0	2.2838	1.34399	0
F2S4_160525_012_B01	123	#476662	Oligo Synpr	3	#808285	Non-Neuronal	2.28534	0	0	2.7107	0	0	0	0	0	0	3.17451	0.721361	3.0657	2.11038	0	0	0	1.32017	2.66156	1.42467	2.42776	1.16854	0	0	0	0	0	0	1.99808	0	1.72913	2.42313	1.88544	1.75158
F2S4_160525_012_E01	118	#665C47	Astro Aqp4	3	#808285	Non-Neuronal	0	0	0	1.7031	0	0	0	0	2.86508	0	3.17182	0	2.83522	0	0	1.41716	2.78396	0	0	0	2.20315	0	2.19233	0	0	0	0	1.44252	0	0	0	0.251726	1.04959	1.45466
F2S4_160525_015_G01	123	#476662	Oligo Synpr	3	#808285	Non-Neuronal	2.27668	0	0	2.50924	0	1.17892	0	0	0	0	3.08295	1.62128	2.76739	2.43607	1.86974	1.86756	0	1.15703	2.22805	2.07275	2.55241	1.5893	0	0	0	0.736554	0	0	0	1.35253	1.69549	2.18077	1.26569	2.15898
F2S4_160526_001_G01	122	#6C8581	Oligo Serpinb1a	3	#808285	Non-Neuronal	2.086	0	0	2.49557	0	0	0	0	0	0	2.91758	2.47829	2.96635	1.8526	0	0	2.18481	0	2.09674	0	2.38196	0	0	0	0	1.80958	0	1.98066	1.94903	0.206988	0.722158	2.09674	0	2.30773
F2S4_160526_002_C01	123	#476662	Oligo Synpr	3	#808285	Non-Neuronal	0	0	0	2.61468	2.15688	0	0	0	0	0	2.78429	2.23643	2.75622	1.61077	0.333229	0	2.78139	1.50726	2.47525	1.82834	2.33948	0	0	0	0	0	0	1.38163	0	0	0	2.31349	0	2.68786
F2S4_160526_002_H01	123	#476662	Oligo Synpr	3	#808285	Non-Neuronal	0	0	0	2.80672	1.45216	0	0	0	0	0	2.58757	0	2.91208	1.65308	0	2.10138	3.15428	1.34882	2.13446	1.96522	2.69505	0	0	0	1.19485	1.44182	0	1.2936	0	0	2.03729	2.37339	0	2.14495
F2S4_160526_004_B01	118	#665C47	Astro Aqp4	3	#808285	Non-Neuronal	0	0	0	2.30559	0	0	0	0	1.81854	0	0	2.48037	2.81856	2.10521	0	0	2.98513	0	2.56673	2.37549	1.74817	0	1.03544	0	0	0	2.50558	0	0	0	0	0	0	0
F2S4_160526_005_A01	118	#665C47	Astro Aqp4	3	#808285	Non-Neuronal	0	0	0	2.02172	2.55125	0	2.48824	0	2.90633	0	2.32234	2.49939	2.72333	0	0	0	2.35271	0	2.42899	0	1.89595	0	2.91572	0	2.54136	0	0	0	0	2.37528	1.21002	2.52402	0.25551	1.9047
F2S4_160526_006_A01	132	#4C6647	PVM Mrc1	3	#808285	Non-Neuronal	2.92749	0	2.70265	2.05575	0.294802	0	0	0	0	0	2.86311	1.24343	2.5328	0	0	1.45029	3.96705	0	2.46894	0.592684	0	1.99618	0	0	0	1.71197	1.85686	0	0	2.1114	0	2.24038	1.47923	2.42683
F2S4_160526_007_E01	132	#4C6647	PVM Mrc1	3	#808285	Non-Neuronal	3.17742	0	3.00849	1.91955	2.55209	0	0	0	0	0	2.58532	0	2.5786	2.02338	0	0	3.77618	1.0871	2.07381	0	0.201554	0	0	0	0	0	0	0	0	2.30618	0	2.53372	1.5472	2.37947
F2S4_160526_008_E01	118	#665C47	Astro Aqp4	3	#808285	Non-Neuronal	0	0	0	2.47919	1.96063	0	0	0	1.97346	0	2.63631	1.53824	2.93753	1.85423	1.60951	0	3.00214	0	2.40167	0	2.34105	1.94742	2.49468	0	0	1.61676	2.31451	0	0	1.88628	0	1.33305	1.274	1.12445
F2S4_160526_010_E01	133	#598069	Microglia Siglech	3	#808285	Non-Neuronal	3.16301	0	0	2.27246	0	0	0	0	0	0	2.64201	0	2.18967	0	0	0	3.2548	0	0	0.73041	1.77638	0	2.03796	0	0	0	0	0	0	0	0	0.210868	2.51075	2.58943
F2S4_160526_010_H01	118	#665C47	Astro Aqp4	3	#808285	Non-Neuronal	1.80884	0	0	2.55657	0.71048	0	0	0	2.00886	0	2.10648	2.30282	2.5202	1.48287	0	1.39597	2.62791	0	2.72556	0	2.54762	0	2.40737	0	0.283014	0	2.14671	0	0	0	0	2.54875	0.843342	2.53032
F2S4_160526_015_D01	118	#665C47	Astro Aqp4	3	#808285	Non-Neuronal	2.01161	0	0	2.09334	2.91197	0	0	0	2.83818	0	0	2.7542	1.57962	2.21169	0	2.40858	2.06662	0.969497	2.75912	1.93948	2.03446	0	0.454735	0	0	0	0	0	0	2.34993	0	0	1.6295	0
F2S4_160526_016_A01	118	#665C47	Astro Aqp4	3	#808285	Non-Neuronal	0.279638	0	0	2.01721	0	0	0	0	2.06027	0	0	0	2.67801	1.80186	0	0	2.89167	0	1.89616	0	2.2486	0	1.79563	0	1.61987	1.93432	0	0	0	0	0.915452	0	1.48894	2.44902
F2S4_160526_016_C01	118	#665C47	Astro Aqp4	3	#808285	Non-Neuronal	2.47191	0	0	2.42407	0	0	0	0	0.947029	0	0	0	3.0313	0	2.17945	0	2.81634	0	2.32937	0	2.21852	0	0	0	0	1.86993	0	0	0	2.82119	0	2.45505	0	0.1734
F2S4_160526_017_C01	118	#665C47	Astro Aqp4	3	#808285	Non-Neuronal	0	0	0	2.28243	1.25391	2.42397	0	0	2.65146	0	2.54276	0	2.29058	2.22221	0	0	2.35548	0	2.50006	0	2.29193	0.205511	1.90783	0	2.46096	1.00333	1.93613	0	0	2.41294	0	0	2.03386	2.39638
F2S4_160531_010_E01	125	#89997A	VLMC Osr1 Mc5r	3	#808285	Non-Neuronal	2.35836	0	0	3.06708	0	0	0	0	0	0	2.8202	0	2.91154	2.81127	0	0	2.77413	1.98194	3.29442	0	2.4846	0	2.37098	0	0	0	0	0	0	0	0	2.72382	1.82462	0
F2S4_160531_011_G01	125	#89997A	VLMC Osr1 Mc5r	3	#808285	Non-Neuronal	2.98741	0	0	2.68354	0	0	0	0	0	0	2.94161	0	2.91338	1.98404	1.48218	0	3.08407	0	2.60602	2.48504	2.39559	0	1.67924	0	0	0	2.5079	0	0	0	1.24329	2.67013	2.24372	2.01973
F2S4_160531_011_H01	125	#89997A	VLMC Osr1 Mc5r	3	#808285	Non-Neuronal	2.48707	0	0	2.49775	0	0	0	0	0	0	2.99046	0	2.62133	1.90858	2.32558	1.80186	2.77726	0.7564	3.11181	0	2.1075	2.31582	2.67474	0	0	0	2.6984	0	0	0	0	2.25066	1.79781	0
F2S4_160531_019_D01	132	#4C6647	PVM Mrc1	3	#808285	Non-Neuronal	2.82964	0	2.64491	2.44261	0	0	0	0	0	0	2.87335	0	2.45521	1.56544	2.29257	0	3.93373	0	2.4475	0	2.17888	0	0	0	0	1.32385	0	1.84523	1.01753	2.42659	1.77802	2.34487	1.82938	2.69499
F2S4_160613_004_B01	132	#4C6647	PVM Mrc1	3	#808285	Non-Neuronal	2.86283	0	3.17128	2.44562	0	2.05516	0	0	0	0	2.70481	0	2.41651	0	0	0	3.9404	0	2.0064	0	1.19694	0	1.26523	0	0	0.638438	0	0	0	1.96744	1.0433	1.8997	1.70391	2.03684
F2S4_160613_004_C01	132	#4C6647	PVM Mrc1	3	#808285	Non-Neuronal	3.34209	0	2.87556	2.43793	0	0	0	0	0	0	2.78325	0	2.85935	0.22736	0	0	4.18573	0	0	0	1.76418	0	0	0	0	1.10364	0	0	0	0	0	2.64877	1.82635	1.92197
F2S4_160613_005_B01	132	#4C6647	PVM Mrc1	3	#808285	Non-Neuronal	3.21604	0	3.2683	2.54716	0	0.595653	0	0	0	0	3.00962	0	2.89724	0	0	2.52676	3.41123	0	2.60635	1.96466	2.61263	1.02365	0	0	0	0	0	0	0	0	0	2.57096	2.54716	2.37752
F2S4_160613_005_H01	132	#4C6647	PVM Mrc1	3	#808285	Non-Neuronal	3.3252	0	2.86236	2.18443	0	2.88327	0	0	0	0	2.96764	0	2.48043	1.83132	0	0	3.67743	0.679602	2.30415	0	0	0	2.46663	0	0	0	2.30142	0	0	0	0.932669	0	2.18799	1.01932
F2S4_160613_006_B01	132	#4C6647	PVM Mrc1	3	#808285	Non-Neuronal	2.95924	0	2.62865	2.64461	0	0	0	0	0	0	2.98301	0	2.64256	0	0	0.228426	4.05412	0	0	0.228426	0	0	0.815366	0	0	0	1.61428	0	0	0	0	0	1.92811	1.89495
F2S4_160613_013_B01	118	#665C47	Astro Aqp4	3	#808285	Non-Neuronal	0.249933	0	0	1.7124	0	0	0	0	2.71137	0	2.37569	0	2.56427	0	0	0	3.0461	1.67119	1.37222	0	2.51762	0	2.19046	0	1.91335	0	2.35679	0	0	0	1.35763	1.91335	0.407563	2.18165
F2S4_160613_014_H01	118	#665C47	Astro Aqp4	3	#808285	Non-Neuronal	1.73106	0	0	2.21027	0	0	0	0	2.57178	0	2.8279	0	2.56394	2.28652	0	0	3.33623	0	2.29883	0	2.15139	0	2.30843	0	0	0	0	1.6013	0	1.90595	0	2.32929	1.17329	0
F2S4_160613_015_C01	118	#665C47	Astro Aqp4	3	#808285	Non-Neuronal	0	0	0	1.80777	1.61301	0	0	0	1.32244	0	2.90082	1.28803	2.80601	1.68328	2.44646	0	3.43611	1.59573	2.80438	2.15435	0	0.255378	2.51637	0	0	0	0	1.41185	0	0	0	0	1.95351	0
F2S4_160613_018_B01	118	#665C47	Astro Aqp4	3	#808285	Non-Neuronal	0	0	0	2.22184	0	0	0	0	2.66368	0	2.53293	0	2.67918	0	2.02834	0	2.9737	0	2.40617	0	2.20546	0	1.61841	0	1.40948	0.655596	1.65379	0	0	0	0	0	0	1.6622
F2S4_160613_018_H01	118	#665C47	Astro Aqp4	3	#808285	Non-Neuronal	0	0	0	1.95124	0	0	0	0	2.87294	0	2.54359	0	1.61555	1.86728	0	0	3.25314	0	2.30602	0	2.24984	0	0.297105	0	0	0	2.05664	0	0	0	0	2.44699	1.86728	0
F2S4_160613_019_A01	118	#665C47	Astro Aqp4	3	#808285	Non-Neuronal	2.08918	0	0	0	0	0	0	0	3.19448	0	1.12227	0	2.79243	1.88869	0	2.40105	2.53387	0	2.3237	0	2.16607	0	0	0	2.55005	0	2.27998	0	1.95252	0	0	0	0	2.35659
F2S4_160613_019_C01	118	#665C47	Astro Aqp4	3	#808285	Non-Neuronal	0	0	0	2.38031	0	0	0	0	2.63756	0	2.81332	0	2.61988	1.02233	0	0	2.57524	1.69464	2.56716	0	1.96353	0	2.17603	0	1.45814	1.738	0.649782	0	0	1.7898	1.02233	2.3288	0	2.2167
F2S4_160613_024_D01	118	#665C47	Astro Aqp4	3	#808285	Non-Neuronal	2.25387	0	0	0	0	0	0	0	2.87087	0	0	0	2.56808	1.76986	2.09047	0	2.60427	0	2.76437	1.23233	2.06419	0	2.9108	0	2.15366	0	0	1.05873	2.02317	0	0	2.39398	1.90179	1.8095
F2S4_160613_026_C01	121	#6B998D	Oligo Rassf10	3	#808285	Non-Neuronal	2.46416	0	0	2.44713	2.32481	1.4624	0	0	0	0	3.23993	0	2.7805	2.01635	0	1.63089	0	0.961205	2.93002	0.30496	2.45262	1.9397	1.4225	0	0	0	0	1.61509	0	2.20506	1.69341	2.33001	2.32689	2.33207
F2S4_160613_026_G01	132	#4C6647	PVM Mrc1	3	#808285	Non-Neuronal	3.36475	0	3.15592	2.36966	0	0	0	0	0	0	2.85187	0	2.7757	0.215514	0	0	4.02381	0	0	0	1.89623	0.358898	1.98559	0	0	0	2.16115	0	0	1.79268	1.50299	2.16689	2.10359	1.8146
F2S4_160613_028_B01	133	#598069	Microglia Siglech	3	#808285	Non-Neuronal	3.30687	0	0	2.28548	0	0	2.24362	0	0	0	2.91286	2.53372	2.88411	0	0	0	3.4841	0	0	1.01078	0	0	2.93558	0	0	0	0	0	0	0	2.85237	0	2.06686	2.27316
F2S4_160629_017_E01	133	#598069	Microglia Siglech	3	#808285	Non-Neuronal	2.59957	0	0	2.59598	0	0	0	0	0	0	0.25999	0	2.76807	0	0	0	3.48502	1.40807	2.42043	2.48326	1.7213	0	0.963626	0	0	0	1.49592	0.631305	1.77826	0	0.25999	2.60225	2.14972	2.21946
F2S4_160629_020_A01	132	#4C6647	PVM Mrc1	3	#808285	Non-Neuronal	2.84434	0	2.60215	2.8433	2.69504	0	0	0	0	0	3.10395	0	2.65707	0	0	0	3.55079	0	0	1.17912	2.24362	0	0	0	0	2.24568	0	2.72252	0	1.22438	2.25977	0	2.62666	0
F2S4_160629_020_C01	132	#4C6647	PVM Mrc1	3	#808285	Non-Neuronal	2.85753	0	3.1591	2.52053	0	0	0	0	0	0	2.75865	0	2.35057	0	0	0	3.55329	1.00531	1.44197	0	1.85234	0	0	0	0	0	0	0	0	2.01181	0	2.68342	2.09029	2.51777
F2S4_160629_020_D01	132	#4C6647	PVM Mrc1	3	#808285	Non-Neuronal	3.25442	0	2.57876	2.952	0	0	0	0	0	0	2.90328	2.30211	0	0	0	0	3.59353	0	0	0	0.223751	0	0	0	0	0	0	0	0	0	0	0	1.80858	2.74902
F2S4_160707_001_D01	118	#665C47	Astro Aqp4	3	#808285	Non-Neuronal	0	0	0	2.48202	0	0	0	0	1.86305	0	0.294984	0	2.65995	0	0	0	1.95644	1.47958	0	0.892454	1.56793	0	0.469041	0	0	0	0	0	1.54447	0	0	0	0	0
F2S4_160707_003_C01	118	#665C47	Astro Aqp4	3	#808285	Non-Neuronal	2.42836	0	0.376031	2.45538	0.376031	0	0	0	2.00063	0	2.7015	1.47592	2.76035	2.23315	2.11541	0	3.11631	0	2.539	1.54931	2.56582	0	1.98233	0	0	1.77968	2.26515	1.93291	0	2.41706	0	1.98852	1.7991	0
F2S4_160707_003_F01	118	#665C47	Astro Aqp4	3	#808285	Non-Neuronal	2.30925	0	0	2.03843	0	0	0	0	2.59089	0	2.6306	0	2.88118	1.48944	2.20988	0.819498	2.9883	0.542649	2.20821	2.06945	2.52677	0	0.351079	0	0.542649	0.675124	2.16051	0	0	0	0	2.13948	1.71091	0
F2S4_160707_003_G01	118	#665C47	Astro Aqp4	3	#808285	Non-Neuronal	1.97647	0	0	2.13282	2.25915	2.22513	0	0	2.25421	0	2.23215	0	2.85982	2.16649	0	0	3.0073	0	2.14998	0	2.44202	0	2.34631	0	2.11266	0	2.51043	0	0	0.226377	0	2.5727	1.69525	1.12432
F2S4_160707_004_C01	118	#665C47	Astro Aqp4	3	#808285	Non-Neuronal	0	0	0	1.8988	0	0	0	0	2.47811	0	2.46727	0	2.78667	1.95384	0	0	3.41883	0	0	1.69526	2.18324	0	2.08351	0	0	0	0	0	0	2.90555	0	0	1.61639	0
F2S4_160707_004_F01	118	#665C47	Astro Aqp4	3	#808285	Non-Neuronal	2.4734	0	0	1.61383	0	0	0	0	0	0	2.67474	0.587056	2.89332	2.12069	0.587056	0	3.18136	1.20512	2.74334	2.1277	2.32091	0	2.25357	0	0	1.6287	2.43859	0	0	0	0	0	0	2.18818
F2S4_160707_005_F01	132	#4C6647	PVM Mrc1	3	#808285	Non-Neuronal	3.49353	0	2.6356	2.30926	0	0	0	0	0	0	0	0	2.90147	1.18828	0	0.266854	2.90378	0	0	0	2.35715	0	0	0	0	0	0	0	1.70817	0	0	0	1.58366	2.60741
F2S4_160707_007_B01	132	#4C6647	PVM Mrc1	3	#808285	Non-Neuronal	2.95378	0	3.01278	2.77636	0	0	0	0	0	0	2.89535	1.73885	3.04337	1.96776	0	0.285048	3.50437	1.85436	2.30802	0	2.12903	0	0	0	0	0	0	0	0	0	0	2.72715	1.66707	0
F2S4_160708_004_A01	132	#4C6647	PVM Mrc1	3	#808285	Non-Neuronal	3.22014	0	3.27089	2.52885	0	0	0	0	0	0	2.38957	0	2.71505	0	0	0	3.51827	1.76558	0	0	1.56144	0.399257	2.68703	0	0	2.05717	0	0	0	0	0	0	2.14048	2.36767
F2S4_160708_005_G01	118	#665C47	Astro Aqp4	3	#808285	Non-Neuronal	2.28986	0	0	2.45838	0	0.217682	0	0	0.556665	0	1.5882	0.792812	2.77604	2.01628	0	0	1.71398	0	2.67527	2.34558	2.86439	0	0	0	0	0	0	2.34174	0	0	0	2.95126	0	1.64295
F2S4_160708_006_F01	118	#665C47	Astro Aqp4	3	#808285	Non-Neuronal	2.16762	0	0	2.44958	0	0	0	0	1.88808	0	2.84859	0	2.78115	0	0	0	3.05347	1.14393	1.00219	0.626579	2.60541	0	1.99395	0	1.14393	2.01884	2.32582	0	0	0	1.949	2.27674	1.65282	2.21289
F2S4_160725_001_G01	118	#665C47	Astro Aqp4	3	#808285	Non-Neuronal	0	0	0	1.89728	0	0	0	0	2.75634	0	2.94113	0	2.77728	2.14187	0	2.0924	0	1.87385	3.12469	0	2.3422	0	1.73291	0	2.25349	0	0	0	0	0	1.26509	2.41027	1.65267	2.37072
F2S4_160726_003_C01	118	#665C47	Astro Aqp4	3	#808285	Non-Neuronal	0	0	0	1.9976	0	0	0	0	2.54302	0	2.77927	0	2.77144	0	2.08891	0	2.84063	0	2.48217	0	2.01672	0	2.20978	0	0.956887	0	0	0	0	1.36875	0	0.277608	2.01672	0
F2S4_160726_005_B01	118	#665C47	Astro Aqp4	3	#808285	Non-Neuronal	0	0	0.226607	2.71103	0	0	0	0	2.80627	0	0.226607	0	2.89088	2.19641	0	0	2.73687	0.811589	2.42617	0	2.65883	0	1.76236	0	2.27419	0	0	0	2.62632	0	0	0	0	2.47366
F2S4_160726_012_B01	118	#665C47	Astro Aqp4	3	#808285	Non-Neuronal	2.01462	0	0	2.53043	0	1.61916	0	0	2.58505	0	2.86121	0	1.81048	1.50391	0	0	3.11042	1.02926	1.92443	0	2.27618	0	0	0	0	0	2.34558	1.13758	0	1.80225	0	1.45137	0.344808	1.80638
F2S4_160811_004_A01	130	#997F7A	Endo Ctla2a	4	#8D1800	Endothelial	2.38273	0	0	2.45906	2.36825	0	0	0	0	0	2.96732	0	2.69394	1.68077	0	0	3.04474	0	0	0	2.64839	0	0	0	2.22496	0	0	0	0	2.13052	0	0	1.24064	2.77652
F2S4_160811_004_B01	127	#74996B	VLMC Spp1 Col15a1	3	#808285	Non-Neuronal	2.85883	0	0	2.69137	0	0.273138	0	0	0	0	2.84492	0	2.80092	0	0	0	3.01863	0	1.95993	1.92521	2.55205	0	3.24031	0	0	0	2.40191	0	0	2.5456	0	1.06096	0	2.49998
F2S4_160811_004_D01	130	#997F7A	Endo Ctla2a	4	#8D1800	Endothelial	2.60151	0	0	2.00516	0	0	0	0	0	0	2.99252	0	2.25439	1.94462	0	0	3.47935	0	0	0	2.10367	0	0	0	2.7061	0	0	1.59506	0	0	0	2.48106	1.13341	2.68248
F2S4_160811_004_E01	130	#997F7A	Endo Ctla2a	4	#8D1800	Endothelial	3.43565	0	0	2.54981	0	0	0	0	0	0	3.16377	0	2.80013	2.37121	0	0.266726	3.40065	0	0	0	2.40871	0	0	0	2.07202	0	0	0	0	0	0	2.21441	0	0.266726
F2S4_160811_005_A01	129	#807059	SMC Acta2	4	#8D1800	Endothelial	0	0	0	2.5149	0	0	0	0	0	0	3.07019	0	2.82693	0	0	0	0	1.1865	0	0	2.80468	0	0	0	0	0	0	0	0	0	0	0	2.474	0
F2S4_160811_005_E01	127	#74996B	VLMC Spp1 Col15a1	3	#808285	Non-Neuronal	0	0	0	2.71446	2.30022	0	0	0	0	0	3.0274	2.40058	2.38271	2.46195	2.76845	0	2.75998	0	2.83238	0	2.58156	2.36853	2.98743	0	0	0.761316	2.24934	0.997703	0.529679	2.31427	0	2.06043	1.86436	0
F2S4_160811_005_F01	130	#997F7A	Endo Ctla2a	4	#8D1800	Endothelial	3.27264	0	0	3.08082	0	0	0	0	0	0	2.66488	0	2.71453	2.25152	0	0	3.2553	0.510426	0	2.57589	2.35738	0	0	0	0	0	0	0	0	0	0	0	2.15248	0
F2S4_160811_006_G01	130	#997F7A	Endo Ctla2a	4	#8D1800	Endothelial	2.57596	0	0	2.21233	0	0	0	0	0	0	2.95407	0	0	2.64996	0	0	3.27001	0.922518	0	0	2.7353	0	0	0	2.75636	0	0	0.34785	0	0	0	2.4953	2.40044	2.70589
F2S4_160811_006_H01	127	#74996B	VLMC Spp1 Col15a1	3	#808285	Non-Neuronal	0	0	0	2.5835	1.88904	0	0	0	0	0	2.98076	0	2.54375	2.61868	1.58702	0	1.92691	1.0413	2.56651	0	2.35906	0	2.62961	0	0	0	0	0	0	2.12298	0	2.5992	2.1249	2.56093
F2S4_160819_001_F01	118	#665C47	Astro Aqp4	3	#808285	Non-Neuronal	0	0	0	1.68492	2.12976	2.6577	0	0	2.75717	0	2.51911	0	2.65077	1.78111	0.204148	0	2.38532	0	2.99404	0	0.913879	0	2.21066	0	2.32436	0	1.95912	0	0	0	0	2.14309	1.29233	1.98685
F2S4_160819_002_A01	121	#6B998D	Oligo Rassf10	3	#808285	Non-Neuronal	2.10554	0	0	2.47561	2.07622	1.67259	0	0	0	0	3.39077	2.17684	2.88463	0.942904	1.57543	1.54216	0	0.851471	2.13829	1.69261	2.51929	2.08025	0	0	0	0	0	0.914513	0.81615	0.191692	0.507782	2.09015	1.93954	2.46583
F2S4_160819_002_E01	118	#665C47	Astro Aqp4	3	#808285	Non-Neuronal	1.95006	0	0	1.14051	0	0	0	0	3.25134	0	2.5252	0	2.87049	2.02186	2.64353	0	3.07644	0	1.82933	0	2.01182	2.47808	2.46754	0	2.06886	0	2.1668	0	0	0.623764	0	2.22443	1.41227	2.22443
F2S4_160819_015_A01	118	#665C47	Astro Aqp4	3	#808285	Non-Neuronal	1.85079	0	0	0.195481	0	0	0	0	2.65714	0	2.71839	0	2.7146	2.01182	0	0	2.22566	0	2.42381	1.16565	2.03521	0	0.893309	0	0	0	2.08667	0	1.24269	0	0	0	1.29579	1.46023
F2S4_160819_017_C01	118	#665C47	Astro Aqp4	3	#808285	Non-Neuronal	0	0	0	1.8679	0	0	0	0	2.44645	0	2.84307	0	2.73483	2.00862	0	0	2.85465	0	2.67408	0	2.31549	0	0	0	1.56537	1.69839	0	2.36991	0	2.30886	0	2.42446	1.84516	0
F2S4_161011_003_B01	131	#805F59	Endo Cytl1	4	#8D1800	Endothelial	0	0	0	2.63879	0	0	0	0	0	0	0	0.655497	3.01095	2.44755	0	0	0	0	0	0.655497	3.16141	0	0	0	0	0	0	0	0	0	0	0	1.84877	0.274373
F2S4_161011_003_C01	131	#805F59	Endo Cytl1	4	#8D1800	Endothelial	3.08229	0	0.165734	2.32528	2.1222	1.30213	0	0	0	0	2.9939	2.053	2.69208	2.43661	1.84075	0	3.20041	0	2.02725	0.949343	2.21509	1.66343	0	0	0	1.01254	0	0.285399	0.628649	1.62689	1.29194	2.24479	2.05656	1.94394
F2S4_161011_003_G01	131	#805F59	Endo Cytl1	4	#8D1800	Endothelial	3.04286	0	0	2.83842	0	0	0	0	0	0	0.251603	0	2.65087	2.61435	0.409885	0.251603	3.16693	1.65275	0	0	2.49823	0	0	0	0	0	0	0	0	0	0	0	2.39485	2.59746
F2S4_161014_001_B01	130	#997F7A	Endo Ctla2a	4	#8D1800	Endothelial	2.62934	0	0	2.44623	0	0	0	0	0	0	0	0	2.65377	2.09881	2.18617	0	3.44055	0	0	0	2.56109	0	0	0	0.221684	0	0	0	0	0	1.23006	2.75976	2.28665	0
F2S4_161014_001_C01	127	#74996B	VLMC Spp1 Col15a1	3	#808285	Non-Neuronal	2.8007	0	0	3.08926	0	0	0	0	0	0	3.2402	0	2.65551	2.65551	0	0	0	0	2.99896	0	2.68261	0	2.95411	0	0	0	2.90584	0	0	0	0	0	2.35544	2.36464
F2S4_161014_001_D01	130	#997F7A	Endo Ctla2a	4	#8D1800	Endothelial	2.79284	0	0	2.59094	0	0	0	0	0	0	2.79019	0	2.39117	1.8759	0	0	3.24291	0	0	2.66013	2.45557	0	0	0	0	0	0	0	0	2.2355	0	2.30913	0	2.42825
F2S4_161014_001_E01	130	#997F7A	Endo Ctla2a	4	#8D1800	Endothelial	3.04994	0	0	2.46178	0	0	0	0	0	0	2.83319	0	2.62312	2.1039	0	1.69106	3.66265	0	0	1.82049	2.73614	0	0	0	0	0	0	0	0	2.4176	0	2.5158	1.8042	2.31552
F2S4_161014_001_G01	130	#997F7A	Endo Ctla2a	4	#8D1800	Endothelial	2.37907	0	0	2.19927	2.61255	0	0	0	0	0	2.37537	0	0	2.06683	0	0	3.83303	2.34858	0	0	2.50995	0	0	0	0	0	0	0	0	0	0.481253	0	0.850403	0
F2S4_161014_001_H01	130	#997F7A	Endo Ctla2a	4	#8D1800	Endothelial	2.7553	0	0	0	0	0	0	0	0	0	2.36727	0	2.67649	1.33134	0	0	3.15472	0	0	0	2.27213	2.50374	0	0	2.8846	1.4654	0.23173	0	0	0	2.58493	0	0	0
F2S4_161014_002_B01	130	#997F7A	Endo Ctla2a	4	#8D1800	Endothelial	0	0	0	2.38977	0	0	1.64246	0	0	0	0	0	2.90775	2.47629	0	0	3.39311	0	0	0	2.68156	0	0	0	0.457152	0	0	0	0	0	0	0.457152	2.44547	0
F2S4_161014_002_D01	130	#997F7A	Endo Ctla2a	4	#8D1800	Endothelial	3.52569	0	0	3.00213	0	0	0	0	0	0	3.02284	1.0907	2.28946	2.73798	0	0	3.24576	0	2.86147	2.82052	2.96705	0	0.353734	0	0	0	0	0	0	0	0	2.6781	2.17814	2.30866
F2S4_161014_002_E01	130	#997F7A	Endo Ctla2a	4	#8D1800	Endothelial	2.91221	0	0	3.16465	0	0	0	0	0	0	1.03554	0	2.81436	2.45611	0	0	3.82234	0	0	0	2.70965	0	0	0	2.80715	0	0	0	0	0	0	0	1.84491	0.27777
F2S4_161014_002_F01	130	#997F7A	Endo Ctla2a	4	#8D1800	Endothelial	2.54199	0	0	2.94572	0	0	0	0	0	0	1.75478	0	2.26195	0.304398	0	0	2.79345	0	0	0	2.68612	0	0	0	0	0	0	0	0	0	1.76247	0	1.88168	1.51165
F2S4_161014_002_G01	127	#74996B	VLMC Spp1 Col15a1	3	#808285	Non-Neuronal	2.53407	0	0	2.63955	0	0	0	0	0	0	2.53407	0	2.63796	2.50043	0	0	0	1.44858	3.08754	0	2.53205	0	3.08184	0	0	0	0	0	0	0	0	2.50909	2.56341	2.38317
F2S4_161014_003_A01	130	#997F7A	Endo Ctla2a	4	#8D1800	Endothelial	3.32613	0	0	3.01963	0.28989	0	0	0	0	0	3.09139	0	2.48536	2.14785	0	2.535	2.99698	0	0	0	2.75489	0	0	0	0	0	0	0	0	0	0	2.60073	0	2.33926
F2S4_161014_003_B01	130	#997F7A	Endo Ctla2a	4	#8D1800	Endothelial	2.99739	0	0	2.66118	0	0	0	0	0	0	2.98633	0	2.53357	2.33567	2.40074	2.32209	3.19335	0	0	0	1.99231	0	0	0	0	0	0	0.689293	2.48897	0	0	2.61277	2.25107	2.37709
F2S4_161014_003_D01	130	#997F7A	Endo Ctla2a	4	#8D1800	Endothelial	2.84334	0	0	0	0	0	0	0	0	0	2.80219	0	2.76842	2.31308	0	0	3.30308	0	0	2.50889	2.68851	2.37022	0	0	2.12375	0	0	0	0	0	1.23832	2.57621	2.25628	2.17615
F2S4_161014_003_E01	129	#807059	SMC Acta2	4	#8D1800	Endothelial	2.91639	0	0	1.87612	0	1.82811	0	0	0	0	2.33831	0	2.65486	2.40465	0	0	0	0	1.58083	1.91934	2.57566	0	0	0	0	1.48034	1.7029	0	0	0	0	2.41604	1.8208	2.45711
F2S4_161014_003_F01	130	#997F7A	Endo Ctla2a	4	#8D1800	Endothelial	2.85184	0	0	2.46404	0	0	0	0	0	0	2.83807	0	2.58113	2.00071	0	2.0065	3.78188	0	0	1.98438	2.45337	0	0	0	2.32997	0	0	1.73329	0	1.73865	0	2.08879	1.52642	2.66038
F2S4_161014_003_H01	130	#997F7A	Endo Ctla2a	4	#8D1800	Endothelial	2.61462	0	0	2.44073	2.1071	0	0	0	0	0	2.87143	0	2.81023	2.16735	2.19986	0	3.41741	0	1.36585	1.78753	2.32455	1.95365	0	0	2.81278	1.89809	0	0	0	0	0.355963	2.62324	1.68675	2.30724
F2S4_161014_004_G01	127	#74996B	VLMC Spp1 Col15a1	3	#808285	Non-Neuronal	2.52053	0	0	2.45244	0	1.59983	2.66671	0	0	0	2.99165	0	2.71865	2.35858	0	0	2.56032	0	2.46648	1.74888	2.71801	0	3.03322	0	0	0	2.73072	0	0	0.857765	0	2.53551	1.48407	2.47896
F2S4_161014_004_H01	130	#997F7A	Endo Ctla2a	4	#8D1800	Endothelial	3.17419	0	0	2.45288	0	0	0	0	0	0	2.85734	0	2.37079	2.41611	0	0	3.4769	0	0	2.38477	2.69603	0	0	0	2.02981	0	0	0	0	0	0	0	2.14369	2.8791
F2S4_161019_001_A01	127	#74996B	VLMC Spp1 Col15a1	3	#808285	Non-Neuronal	2.59166	0	0	2.03741	0	0	0	0	0	0	2.90277	0	2.44915	2.59096	0	0	2.31466	0.859888	2.31203	1.44471	2.59027	0	2.97652	0	0	1.53257	2.56073	0	0	0	0	2.57177	1.53257	0
F2S4_161019_001_B01	130	#997F7A	Endo Ctla2a	4	#8D1800	Endothelial	3.20514	0	0	2.60791	0	0	0	0	0	0	3.27671	0	3.19925	0	0	0	3.60552	1.70609	0.262556	0	2.73569	0	0	0	0	0	0	0	0	2.73635	1.20271	0	0	0
F2S4_161019_001_D01	130	#997F7A	Endo Ctla2a	4	#8D1800	Endothelial	1.86027	0	0	2.70303	0	0	0	0	0	0	2.54478	0	2.40623	2.3103	0	2.20157	3.64557	1.7281	0.219023	0	2.5057	0	0	0	0	0	0	0	0	2.15432	0	2.5851	1.83603	2.4006
F2S4_161019_001_F01	127	#74996B	VLMC Spp1 Col15a1	3	#808285	Non-Neuronal	0	0	0	3.06498	0	0	0	0	0	0	2.86319	0	2.87815	2.45689	0	0	0	0	0	0	2.75366	0	0	0	0	0	2.1103	0	0	2.45389	0	2.60471	1.68331	0.472448
F2S4_161019_001_G01	130	#997F7A	Endo Ctla2a	4	#8D1800	Endothelial	0	0	0	2.79453	0	0	0	0	0	0	2.68544	1.43493	2.89635	2.26096	0	0	3.33548	0	0	2.47872	2.49622	0	0	0	1.28353	0	0	0	0	0.237646	0	2.50521	2.42273	1.41104
F2S4_161019_001_H01	130	#997F7A	Endo Ctla2a	4	#8D1800	Endothelial	3.02985	0	0	3.07299	0	0	0	0	0	0	3.03366	0	2.73705	0	0	0	3.41822	0	0	0	2.39328	0	0	0	0	0	0	0	0	0	0	2.57754	0	0
F2S4_161019_002_A01	130	#997F7A	Endo Ctla2a	4	#8D1800	Endothelial	3.02156	0	0	1.00661	0	0	0	0	0	0	3.08514	0	2.96551	1.78826	0	0	3.49167	1.00661	0	0	2.56266	0	0	0	0	0	0	0	0	2.91683	0	1.87589	2.29622	2.74269
F2S4_161019_002_C01	130	#997F7A	Endo Ctla2a	4	#8D1800	Endothelial	2.67735	0	0	2.81567	0	0	0	0	0	0	2.85488	0	2.77813	2.05851	0	2.16896	3.4077	0	0	1.94907	2.68198	0	0	0	0	1.07308	0	0	0	0	1.09586	2.28654	2.12973	2.25232
F2S4_161019_006_A01	130	#997F7A	Endo Ctla2a	4	#8D1800	Endothelial	3.0756	0	0	2.68928	0	0	0	0	0	0	2.85544	0	2.86371	2.69737	0	0	3.10852	1.00816	0	0	2.6233	0	0	0	0.747787	1.52066	0	0.574829	0	1.36277	1.55534	2.28363	2.40748	2.3233
F2S4_161019_006_B01	130	#997F7A	Endo Ctla2a	4	#8D1800	Endothelial	2.97215	0	0	2.69976	0	0	0	0	0	0	2.96733	0	2.48855	1.69977	0	0	3.64981	0.64906	0	1.1909	2.34415	0	0	0	2.12406	1.78149	0	0	0	2.34686	0	2.5725	2.1751	2.34142
F2S4_161019_006_C01	130	#997F7A	Endo Ctla2a	4	#8D1800	Endothelial	2.82438	0	0	2.47375	0	0	0	0	0	0	2.50583	0	2.70084	2.16478	0	0	3.11242	1.19328	0	1.04303	2.64263	0	0	0	2.91949	0	0	0	0	0	1.32393	1.40904	1.86401	3.04999
F2S4_161019_006_E01	130	#997F7A	Endo Ctla2a	4	#8D1800	Endothelial	0	0	0	2.21329	0	0	0	0	0	0	2.98778	0	2.7822	2.28592	0	0	3.18727	0	0	2.33702	2.63866	0	0	0	0	0	0	0	0	0	0	2.60009	2.00302	2.47726
F2S4_161019_006_H01	130	#997F7A	Endo Ctla2a	4	#8D1800	Endothelial	3.00485	0	0	2.62221	0	0	0	0	0	0	2.8792	0	2.08644	0	0	2.51817	3.4535	0	0	0	2.61504	0	0	0	1.76079	0	0	0	0	0	0	0	2.12444	2.40518
F2S4_161019_007_B01	130	#997F7A	Endo Ctla2a	4	#8D1800	Endothelial	1.9713	0	0	2.60539	2.60879	0	0	0	0	0	2.98632	0	2.79567	2.35673	0	0	3.00302	2.10328	0	1.42041	2.70277	0	0	0	2.78055	0	0	0	0	2.31553	0.950118	2.36422	1.99973	2.18907
F2S4_161019_007_C01	130	#997F7A	Endo Ctla2a	4	#8D1800	Endothelial	3.19822	0	0	2.78242	0	0	0	0	0	0	2.41715	0	2.93302	1.56521	0	0	3.63758	0	0	0	2.89316	0	0	0	1.88172	0	0	0	0	1.99995	1.24299	0	2.01559	2.95608
F2S4_161019_007_D01	130	#997F7A	Endo Ctla2a	4	#8D1800	Endothelial	2.94898	0	0	2.60587	2.00455	0	0	0	0	0	2.72658	0	2.62689	2.36529	0	1.67374	3.51327	1.17183	1.69449	1.53268	2.53004	1.90871	0	0	2.38912	0.519686	0	1.45799	0	1.61301	0.939339	2.44415	2.03024	2.46297
F2S4_161019_008_E01	130	#997F7A	Endo Ctla2a	4	#8D1800	Endothelial	2.85138	0	0	2.61948	1.72046	0	0	0	0	0	2.71618	0	2.49595	2.27926	0	0	3.32997	0.939119	1.38158	1.59616	2.62506	0	0	0	1.977	0.80512	1.5609	0	1.75703	2.02686	1.51238	2.41534	1.85592	2.54147
F2S4_161019_009_B01	130	#997F7A	Endo Ctla2a	4	#8D1800	Endothelial	2.2484	0	0	2.32425	0	0	0	0	0	0	2.75937	0	2.57643	1.8327	0	0	3.53674	0	0	0	2.13809	2.40836	0	0	2.93236	0	0	0	0	2.17058	0	2.85872	2.03489	2.51093
F2S4_161019_009_D01	127	#74996B	VLMC Spp1 Col15a1	3	#808285	Non-Neuronal	3.06821	0	0	2.35224	0.402984	0	0	0	0	0	2.7667	0	2.7499	2.64784	1.52992	0	0.517698	0	3.12356	0	2.55674	0	2.11721	0	0	0	2.70384	0	0	2.65891	0	0	1.92604	2.93277
F2S4_161019_009_E01	130	#997F7A	Endo Ctla2a	4	#8D1800	Endothelial	3.2869	0	0	1.96799	0	0	0	0	0	0	2.93193	0	2.73118	0.849327	0	0	3.11528	1.81967	0	0	2.56551	0	0	0	1.71724	2.00674	0	0.985395	0	0	0	2.60277	1.77147	2.1814
F2S4_161019_011_A01	130	#997F7A	Endo Ctla2a	4	#8D1800	Endothelial	2.58414	0	0	1.45248	2.59412	0	2.28424	0	0	0	2.66381	0	2.79477	1.81426	0	2.00631	3.50432	0	0	1.32658	2.28558	0	0	0	0	0	0	0	0	1.97191	0	2.06345	1.36164	2.35696
F2S4_161019_011_B01	130	#997F7A	Endo Ctla2a	4	#8D1800	Endothelial	2.89646	0	0	2.40087	2.08082	0	0	0	0	0	2.68691	0	2.69262	1.57316	2.02526	0	3.53049	0	2.01639	1.57933	2.44059	0	0	0	2.75291	0	0	1.21838	0	1.93265	0	2.59273	2.04458	2.21584
F2S4_161019_011_C01	130	#997F7A	Endo Ctla2a	4	#8D1800	Endothelial	2.1559	0	0	2.64521	0.908986	0	0	0	0	0	2.75568	0	2.17695	2.3851	2.55202	0	3.73329	0	2.65896	0	2.40983	0	0	0	2.97287	0	0	0	0	0	0	2.65214	2.21621	2.75568
F2S4_161019_011_G01	130	#997F7A	Endo Ctla2a	4	#8D1800	Endothelial	2.80824	0	0	2.37086	0	0	0	0	0	0	2.80939	0	2.67254	1.89637	2.36451	2.3698	3.40274	0	0	0	2.70387	0.743624	0	0	2.18185	0	0	0	0	2.23664	0	2.12102	1.22776	0
F2S4_161019_012_B01	130	#997F7A	Endo Ctla2a	4	#8D1800	Endothelial	3.00037	0	0	2.12519	2.16977	0	0	0	0	0	3.18147	0	2.72085	1.80569	0	0	3.31159	2.01393	0.157457	0.652828	2.39505	0	0	0	2.35673	0	0	1.55582	0	2.21253	0	2.27726	1.91299	0.272771
F2S4_161019_013_B01	130	#997F7A	Endo Ctla2a	4	#8D1800	Endothelial	2.40244	0	0	2.55885	0	0	0	0	0	0	2.92662	0	2.67515	2.22334	1.82419	1.91314	3.77297	0	0	0	2.54447	0	0	0	2.65512	0	0	0	0	0	0	0	2.23343	2.59129
F2S4_161019_013_C01	130	#997F7A	Endo Ctla2a	4	#8D1800	Endothelial	2.60955	0	0	2.3629	0.355763	0	0	0	0	0	3.32365	0	0	0	0	0	3.88765	0	0	2.35567	2.6242	0	0	0	0	2.59719	0	0	0	0	0	2.90596	0	2.75538
F2S4_161019_013_E01	130	#997F7A	Endo Ctla2a	4	#8D1800	Endothelial	2.89746	0	0	2.5183	1.8145	0	0	0	0	0	2.75933	0	2.96461	2.30398	0	0	3.11191	1.06842	1.47799	0	2.37484	2.46555	0	0	1.5065	0	0	0	0	2.41835	2.43978	2.56774	0	2.22192
F2S4_161020_001_A01	130	#997F7A	Endo Ctla2a	4	#8D1800	Endothelial	2.86136	0	0	3.03537	2.8016	0	0	0	0	0	2.37273	0	2.7215	1.99	0	0	3.58246	0	0	0	2.73319	0	0	0	2.65937	0	0	0	0	0	0	1.98006	1.66578	2.72558
F2S4_161020_001_B01	125	#89997A	VLMC Osr1 Mc5r	3	#808285	Non-Neuronal	2.55572	0	0	2.36599	0	0	0	0	0	0	3.27157	0	2.78819	2.07701	2.55905	0	2.75485	0.815095	3.05719	2.27289	2.16914	0	1.83918	0	0	0	0.687788	0	0	0	0	0	1.84265	2.47998
F2S4_161020_001_C01	125	#89997A	VLMC Osr1 Mc5r	3	#808285	Non-Neuronal	2.80364	0	0	0	0	0	0	0	0	0	1.49154	2.98064	0.263323	0	0	2.8365	3.01798	0	2.74133	0	1.75478	0	0.778301	0	0	0	0	2.39111	0	0	0	0	0	1.77348
F2S4_161020_001_D01	125	#89997A	VLMC Osr1 Mc5r	3	#808285	Non-Neuronal	2.67205	0	0	2.54461	0.432544	0	0	0	0	0	2.81882	0	3.02043	2.18132	0	0	3.09738	0.195655	2.6353	0	2.0288	0	0.924203	0	0	0	0.825502	1.0928	0	2.2734	0.744522	2.51994	1.84425	2.10108
F2S4_161020_001_E01	130	#997F7A	Endo Ctla2a	4	#8D1800	Endothelial	2.85868	0	0	2.23771	0	0	0	0	0	0	2.76607	0.204946	3.13898	0.204946	0	0	2.79974	0	0	0	2.3277	0	0	0	1.62332	0	0	2.42935	0	0	0	0	2.22853	2.25261
F2S4_161020_001_H01	130	#997F7A	Endo Ctla2a	4	#8D1800	Endothelial	2.81591	0	0	2.4701	1.56074	0.19352	0	0	0	0	3.15065	0	2.88847	2.0893	0	0	3.79237	0	0	0	2.61839	0	0	0	1.95009	0	0	1.98679	0	0.781957	0.19352	2.54571	2.09717	0
F2S4_161020_002_A01	125	#89997A	VLMC Osr1 Mc5r	3	#808285	Non-Neuronal	2.70972	0	0	2.69481	0	0	0	0	0	0	2.34909	0	2.5197	2.67372	1.62729	0	3.04093	1.14531	2.63508	2.18986	2.3914	0	2.30088	0	0	0	0	2.36094	0	0	0	2.46535	1.95703	2.75208
F2S4_161020_002_B01	130	#997F7A	Endo Ctla2a	4	#8D1800	Endothelial	2.27874	0	0	2.78189	0	0	0	0	0	0	2.96739	0	2.49532	0	0	0	2.72005	1.54722	0.201561	0	2.78862	0	0	0	0	0	0	0	0	0	0	2.41444	2.34843	2.88647
F2S4_161020_002_D01	125	#89997A	VLMC Osr1 Mc5r	3	#808285	Non-Neuronal	3.02086	0	0	2.53217	0.815982	0	0	0	0	0	3.07137	0	2.55588	2.51371	0	2.55513	2.82261	0	2.90589	1.51092	2.69045	0	2.16196	0	0	2.07894	2.18353	0	0	0	0	0	2.29302	2.12944
F2S4_161020_002_F01	125	#89997A	VLMC Osr1 Mc5r	3	#808285	Non-Neuronal	2.86318	0	0	2.55173	1.8153	0	0	0	0	0	2.93149	0	2.58787	2.83084	0	0	2.68343	0	2.95308	1.90238	2.62255	2.53447	2.83845	0	0	0	1.54496	0	0	0	0	0	1.91255	0
F2S4_161020_003_C01	130	#997F7A	Endo Ctla2a	4	#8D1800	Endothelial	2.65429	0	0	2.21865	0	0	0.312629	0	0	0	0	0	2.6903	0	0	0	3.7261	1.40218	0	0	2.31504	0	0.312629	0	0.717382	0	0	0	0	0	1.34405	0	2.10189	2.95938
F2S4_161020_003_D01	125	#89997A	VLMC Osr1 Mc5r	3	#808285	Non-Neuronal	1.78788	0	0	2.52345	1.52585	0	0	0	0	0	2.98029	0	3.03387	2.05301	1.81512	0	2.4924	0	2.80099	1.90106	1.74041	0	1.93839	0	0	0	2.40679	1.75277	0	0	0	0	1.94627	0
F2S4_161020_003_E01	125	#89997A	VLMC Osr1 Mc5r	3	#808285	Non-Neuronal	2.37799	0	0	2.89723	1.60762	0	0	0	0	0	1.33121	0	3.0224	2.31114	0	0	2.11544	1.22194	3.07575	0.644096	2.82122	0	1.02277	0	0	0	2.06498	0	0	1.02277	0	1.44045	1.95545	2.77109
F2S4_161020_003_F01	125	#89997A	VLMC Osr1 Mc5r	3	#808285	Non-Neuronal	2.58478	0	0	3.05458	0	0	0	0	0	0	3.11398	0	2.60742	1.96532	0	0	0	1.57055	2.36584	2.47303	2.49185	0	2.69067	0	0.540107	0	0	0	0	0	0	2.45586	2.0232	3.00806
F2S4_161020_003_G01	125	#89997A	VLMC Osr1 Mc5r	3	#808285	Non-Neuronal	2.20606	0	0	1.77725	0	0	0	0	0	0	3.26258	0	2.88798	2.29456	2.47678	0	2.55238	0	3.24776	0	2.29731	2.58681	0.821974	0	0	0	0	0	0	0	0	1.52594	2.42273	1.22163
F2S4_161020_004_A01	125	#89997A	VLMC Osr1 Mc5r	3	#808285	Non-Neuronal	0	0	0	2.19744	0	2.43962	0	0	0	0	2.80369	0	2.91613	0	2.80931	0	0	0	2.437	2.18352	2.43436	0	1.79448	0	0	0	0.775983	0	0	0	0	0.711112	1.66021	0
F2S4_161020_004_C01	130	#997F7A	Endo Ctla2a	4	#8D1800	Endothelial	1.97019	0	0	2.61017	0	0	0	0	0	0	2.72019	0	2.44908	2.06441	0	0	3.32007	0	0	0	2.25998	0	0	0	1.44745	0	0	0	0	0	1.34954	0	2.43024	2.40842
F2S4_161020_004_D01	130	#997F7A	Endo Ctla2a	4	#8D1800	Endothelial	2.40081	0	0	2.40247	0	0	0	0	0	0	2.76423	0	2.67971	0	0	0	3.4533	0	0	0	2.72599	0	0	0	0	0	0	0	0	2.56795	0	0	0	0
F2S4_161020_004_E01	130	#997F7A	Endo Ctla2a	4	#8D1800	Endothelial	2.28536	0	0	2.57125	0	0	0	0	0	0	3.02136	2.17962	2.34569	2.10797	0	0	3.56386	1.04387	0	2.32256	2.17547	0	0	0	0	0	2.46339	0	0	2.6292	0	2.49944	0	2.5585
F2S4_161020_004_F01	125	#89997A	VLMC Osr1 Mc5r	3	#808285	Non-Neuronal	2.32173	0	0	2.59909	0	0	0	0	0	0	2.77092	2.55086	2.69278	0	1.92296	0	2.66445	0	1.84087	0.2453	2.41348	0	1.51698	0	0	0	2.37352	0	0	0	0	2.58474	0	0
F2S4_161020_004_G01	127	#74996B	VLMC Spp1 Col15a1	3	#808285	Non-Neuronal	2.49452	0	0	2.16252	0	0	0	0	0	0	2.72481	2.50646	2.8494	2.53127	2.43745	0	3.08035	0	1.72624	0	2.31761	0	2.40272	0	0	0	1.38413	0	0	0	0	0	1.96234	0
F2S4_161020_004_H01	130	#997F7A	Endo Ctla2a	4	#8D1800	Endothelial	3.09557	0	0	2.21312	0	2.32837	0	0	0	0	2.63179	0	2.74493	1.73239	0	0	3.01147	0	0	2.25557	2.64519	0	0	0	0	0	0	0	0	1.6494	0	2.75631	2.16806	2.2374
F2S4_161020_005_A01	125	#89997A	VLMC Osr1 Mc5r	3	#808285	Non-Neuronal	2.61714	0	0	2.71031	0	0	0	0	0	0	2.90758	0	2.64165	2.31792	0	0	2.78387	0	2.40951	2.53031	2.29124	0	1.28366	0	0	0	2.00355	0	1.61357	0	0	0	2.37622	1.77298
F2S4_161020_005_C01	125	#89997A	VLMC Osr1 Mc5r	3	#808285	Non-Neuronal	2.99773	0	0	2.64653	0	0	0	0	0	0	0	0	2.45065	0	2.59743	0	2.54938	0	2.6165	2.08068	1.44163	0	2.7991	0	0	0	0	0	0	0	0	0	1.03619	0
F2S4_161020_005_E01	125	#89997A	VLMC Osr1 Mc5r	3	#808285	Non-Neuronal	2.60205	0	0	1.82666	0	0	0	0	0	0	3.10761	0	2.80443	0	0	0	2.7056	0	3.23721	0	2.00586	0	2.36836	0	0	2.37289	0	0.537541	0	0	0	0	1.19553	2.52042
F2S4_161020_005_F01	125	#89997A	VLMC Osr1 Mc5r	3	#808285	Non-Neuronal	0	0	0	2.55572	0	0	0	0	0	0	2.63789	0	2.64909	2.45774	0	0	1.66635	0	2.73233	1.90536	2.73957	0	1.43289	0	0	0	0	0	0	1.74397	0	0	2.14077	2.11884
F2S4_161020_005_H01	130	#997F7A	Endo Ctla2a	4	#8D1800	Endothelial	2.7834	0	0	2.64646	0	0	0	0	0	0	2.90262	0	2.63044	1.97622	1.0758	0	3.42421	0	1.75936	2.06387	2.48079	0	0	0	2.12019	0.358539	0	0	0	1.79652	1.05175	2.30357	1.99069	2.52038
F2S4_161020_006_B01	125	#89997A	VLMC Osr1 Mc5r	3	#808285	Non-Neuronal	3.21403	0	0	2.66787	0	0	0	0	0	0	2.86879	0	2.59497	2.18856	0	0.79232	2.1787	1.84169	3.01337	2.52453	2.51887	0	1.71703	0	0	0	2.4656	0	0	0	0	2.6063	2.14769	2.20764
F2S4_161020_006_D01	125	#89997A	VLMC Osr1 Mc5r	3	#808285	Non-Neuronal	3.00354	0	0	2.49563	2.25761	0	0	0	0	0	2.79768	0	2.95585	2.46232	2.79135	0	3.02335	0	2.64527	1.39692	2.66355	0	2.08763	0	0	0	0	0	0	2.4329	1.26332	0	2.46232	1.65878
F2S4_161020_006_E01	125	#89997A	VLMC Osr1 Mc5r	3	#808285	Non-Neuronal	2.31343	0	0	3.00581	0.748353	0	0	0	0	0	2.39976	0	2.96518	2.15034	0	1.73179	2.59771	0	2.74051	1.00878	2.34766	2.56269	2.8735	0	0	0	0	0	0	0	0	0	1.55042	0
F2S4_161020_006_G01	125	#89997A	VLMC Osr1 Mc5r	3	#808285	Non-Neuronal	2.64021	0	0	2.63934	0	0	0	0	0	0	3.20241	0	2.65974	2.16421	0	0	0.272584	1.49916	3.12013	1.44823	2.25739	0	1.60524	0	0	0	2.50119	0	0	2.58471	1.32395	2.51415	1.70563	0
F2S4_161020_007_E01	125	#89997A	VLMC Osr1 Mc5r	3	#808285	Non-Neuronal	0.338365	0	0	2.66037	0	0	0	0	0	0	2.96121	0	2.73996	2.07322	0	2.29273	2.74827	0	2.97227	2.25169	2.28216	0	2.3432	0	0	0	2.31561	0	0	1.08656	0	2.50524	2.34204	2.64441
F2S4_161020_007_G01	125	#89997A	VLMC Osr1 Mc5r	3	#808285	Non-Neuronal	2.88319	0	0	2.75042	0	0	2.04737	0	0	0	2.29929	0	2.08202	2.02008	0	1.55117	3.21066	0	2.99353	0	2.41034	0	2.46142	0	0	0	2.22616	0	0	2.59106	1.60764	0	1.93555	1.87916
F2S4_161020_008_B01	125	#89997A	VLMC Osr1 Mc5r	3	#808285	Non-Neuronal	2.99814	0	0	2.6794	0	0	0	0	0	0	2.76137	0	2.63177	2.69728	0	0	2.82878	1.25864	2.64592	0	2.66742	0	2.4108	0	0	0	0	0	0	0	0	2.49646	1.24425	2.37767
F2S4_161020_008_C01	130	#997F7A	Endo Ctla2a	4	#8D1800	Endothelial	3.01156	0	0	2.64422	2.41215	0	0	0	0	0	2.7391	0	2.7378	2.15712	0	1.54922	3.14954	0.810442	0	0	2.5595	0	0	0	2.07755	0	0	0	0	0	0	2.64206	2.22007	2.33932
F2S4_161020_008_D01	125	#89997A	VLMC Osr1 Mc5r	3	#808285	Non-Neuronal	2.34941	0	0	2.46402	0	0	0	0	0	0	3.11441	0	2.97227	2.40837	0	1.32234	0	0	2.46402	0	2.36491	0	2.2854	0	0	0	0	0	0	0	0	0	1.89153	2.56063
F2S4_161020_008_F01	130	#997F7A	Endo Ctla2a	4	#8D1800	Endothelial	0	0	0	2.31996	0	0	2.57041	0	0	0	2.99045	0	3.20287	0	0	0	2.70062	0	0	2.53469	2.42947	0	0	0	2.61933	0	0	0	0	0	0	2.6553	2.60792	2.83925
F2S4_161020_008_H01	130	#997F7A	Endo Ctla2a	4	#8D1800	Endothelial	3.06796	0	0	2.36862	0	2.29697	0	0	0	0	3.00504	0	2.61071	2.09051	2.03636	0	3.39493	0	0	0	2.53044	0	0	0	2.66352	0	0	1.7393	0	0	0	2.60596	1.47533	2.09827
F2S4_161104_001_A01	119	#476655	OPC Pdgfra Grm5	3	#808285	Non-Neuronal	2.13193	0	0	1.91676	0	1.49203	0	0	0	0	3.44186	0	3.11113	2.51769	0	0	0	1.29227	1.90143	2.4302	2.74854	0	2.64301	0	0	0	0	0.497792	0	0	0	2.37359	1.5655	2.63516
F2S4_161104_001_B01	123	#476662	Oligo Synpr	3	#808285	Non-Neuronal	1.92015	0	0	2.87571	0	0	0	0	0	0	2.81216	2.02873	3.11969	2.45503	0	0.180063	0	1.31225	2.01816	0	2.67783	0	0	0	0	0	0	0	0	0	0	2.31386	0	1.89815
F2S4_161104_001_F01	122	#6C8581	Oligo Serpinb1a	3	#808285	Non-Neuronal	0	0	0	2.68899	0	0	0	0	0	0	2.47507	0	2.971	2.33607	0	0	2.9889	1.34639	2.4407	0	2.75964	2.54039	0	0	0	0	0	2.38208	0	0	0	2.45937	0.514765	2.41238
F2S4_161104_003_D01	122	#6C8581	Oligo Serpinb1a	3	#808285	Non-Neuronal	0.475821	0	0	2.85317	0	0	0	0	0	0	2.8706	0.366862	3.0448	0.475821	0	0	3.14387	1.35986	2.53922	0	2.84501	2.35536	1.80199	0	0	0	0	0	0	0	0	1.29188	2.35408	2.43209
F2S4_161114_002_A01	129	#807059	SMC Acta2	4	#8D1800	Endothelial	2.90505	0	0	2.60616	2.11586	0	0	0	0	0	0.240656	0	0.240656	2.44967	0	0	0.240656	1.69782	2.82099	0	2.89123	0	2.14214	0	0	0	0	2.10083	0	0	0	0	2.35428	2.60695
F2S4_161114_003_A01	129	#807059	SMC Acta2	4	#8D1800	Endothelial	3.12946	0	0	2.56586	0	1.18445	2.25234	0	0	0	3.11901	0	2.60456	2.56653	0	0	0	0.646403	2.1945	1.52614	2.90226	0	2.07468	0	0	0.788521	1.99956	0	0	0	0.19636	1.78551	2.08907	2.53366
F2S4_161114_003_B01	129	#807059	SMC Acta2	4	#8D1800	Endothelial	3.34527	0	0	2.99298	0	0.630872	0	0	0	0	2.59613	0	0	2.11178	0	0	0	0	2.79183	0	3.08416	0.218765	0	0	0	0	0	2.59613	0	0.218765	0	0.218765	1.34155	2.50326
F2S4_161114_003_D01	129	#807059	SMC Acta2	4	#8D1800	Endothelial	3.38913	0	0	2.83704	0	0	0	0	0	0	2.67378	0	2.83404	2.40104	0	0	0	0	0	0	2.75498	0	1.01969	0	0	0	0	0	0	2.6694	0	2.64451	2.15521	2.95541
F2S4_161114_003_E01	129	#807059	SMC Acta2	4	#8D1800	Endothelial	3.14665	0	0	2.1773	0	0	0	0	0	0	2.96718	0	3.03101	0.272722	0	0	0	0	0	2.35829	3.18299	0	3.10252	0	0	0	0	0	0	0	0	0	2.42306	2.52364
F2S4_161114_003_F01	129	#807059	SMC Acta2	4	#8D1800	Endothelial	2.82344	0	0	2.69717	0	2.72239	0	0	0	0	3.39358	0	3.00574	2.0336	0	0.720437	2.37095	0	0	0	3.07392	0	0	0	0	0	0	1.74496	0	2.18786	0	2.61581	1.69201	2.80017
F2S4_161114_003_H01	129	#807059	SMC Acta2	4	#8D1800	Endothelial	2.96938	0	0	2.62518	0	0	0	0	0	0	3.19441	0.285348	2.41532	2.39305	0	0	0	1.73205	2.05111	0	3.0059	2.56253	0	0	0	0.285348	0	0	0	2.41532	0	2.96064	1.9322	1.55996
F2S4_161114_004_A01	129	#807059	SMC Acta2	4	#8D1800	Endothelial	3.06309	0	0	2.54236	0	0	0	0	0	0	2.83137	0	2.83558	0.532211	0	0	0	1.96576	2.50646	0	2.5831	0	0	0	0	0	0	0	0	0.204509	0	2.60569	0.342989	2.76266
F2S4_161114_004_B01	129	#807059	SMC Acta2	4	#8D1800	Endothelial	3.50323	0	0	2.41176	0	1.78015	0	0	0	0	3.24694	0	2.97747	2.19924	0	0	0	2.36967	0	0	2.97776	0	0	0	0	0	0	0	0	0	0	1.7563	2.36244	3.09814
F2S4_161114_004_C01	129	#807059	SMC Acta2	4	#8D1800	Endothelial	3.27509	0	0	2.44498	0	0	0	0	0	0	3.16653	0	2.80843	2.05612	0	0	0.371222	0	0	0	2.91253	0	0.224123	0	0	0	0	2.37916	0	0	0	2.48325	2.19409	2.14655
F2S4_161114_004_D01	129	#807059	SMC Acta2	4	#8D1800	Endothelial	2.20973	0	0	1.98832	0	0.398882	0	0	0	0	3.14669	0	2.68776	2.05941	0	0	0	1.62736	0	2.36845	2.98968	0	1.55175	0	0	0	0	0	0	2.49607	0	0	0	0.243711
F2S4_161114_004_E01	129	#807059	SMC Acta2	4	#8D1800	Endothelial	2.30715	0	0	2.39139	1.85101	0	0	0	0	0	3.26748	0	2.82348	2.48993	0	0	2.2342	0	0	0	2.97545	0	0.70076	0	0	0	0	0	0	0	0.821442	2.50873	0	2.80692
F2S4_161114_004_F01	129	#807059	SMC Acta2	4	#8D1800	Endothelial	2.44115	0	0	2.86874	0	0	0	0	0	0	2.6782	0	2.93398	2.23399	0	0	0	0	2.70993	0	2.9763	0	0	0	0	1.98013	0	0	0	2.40974	1.15369	2.50119	1.96904	0.945822
F2S4_161114_004_G01	129	#807059	SMC Acta2	4	#8D1800	Endothelial	3.13961	0	0	1.87057	2.46466	0.204185	0	0	0	0	3.00535	1.77687	2.56056	2.44077	0	0	2.62999	0	0	0	2.90043	0	0	0	0	0	0	0	0	2.49321	0	1.73095	2.20754	2.33301
F2S4_161114_005_A01	129	#807059	SMC Acta2	4	#8D1800	Endothelial	3.01412	0	0	0	0	0	0	0	0	0	3.3168	0	2.0922	2.28384	0	0	0	0	0	0	3.166	0	0	0	0	0	0	0.256939	0	2.71655	0	2.82551	2.20182	2.21484
F2S4_161114_005_B01	129	#807059	SMC Acta2	4	#8D1800	Endothelial	3.16279	0	0	2.86031	0	0	0	0	0	0	0	0	3.29626	2.22342	0	0	0	0	0	0	2.65196	0	2.2726	0	0	0	0	0	0	0	0	2.47321	2.20803	2.82479
F2S4_161114_005_C01	129	#807059	SMC Acta2	4	#8D1800	Endothelial	3.02534	0	0	2.30983	0	2.6117	0	0	0	0	3.31987	0	2.83262	2.31614	0	0	2.68345	0	0.203396	0	2.77694	0	2.0473	0	0	0	0	0	0	2.48436	0	1.58695	2.52878	0
F2S4_161114_005_D01	129	#807059	SMC Acta2	4	#8D1800	Endothelial	2.80926	0	0	2.53888	0	0	0	0	0	0	2.62242	0	2.84729	2.1847	0	0	2.75794	1.28216	2.75965	0	3.16158	0	2.11247	0	0	0	0	0	0	2.47561	0	2.25216	2.06708	1.959
F2S4_161114_005_E01	129	#807059	SMC Acta2	4	#8D1800	Endothelial	3.02035	0	0	2.25425	0	0	0	0	0	0	3.38532	0	2.12629	1.94016	0	0	0	1.56298	2.57739	0	2.94471	0	1.1825	0.527696	0	0	0	0	0	0.252894	0	2.30471	2.50653	2.64378
F2S4_161114_005_F01	129	#807059	SMC Acta2	4	#8D1800	Endothelial	2.79387	0	0	2.55816	1.80759	0	0	0	0	0	2.84679	0	3.1325	2.14309	0	0	0	0	2.54718	0	2.85194	0	0	0	0	0	0	0	0	0	0	2.24658	1.92198	0
F2S4_161114_005_G01	129	#807059	SMC Acta2	4	#8D1800	Endothelial	2.69077	0	0	2.29296	2.0651	0	0	0	0	0	2.50912	0	3.01487	0	0	0.223629	0	1.13978	0	1.28296	2.71058	0	1.26744	0	0	0	0	0.223629	0	0	2.56513	0	1.73406	2.33143
F2S4_170117_002_A01	118	#665C47	Astro Aqp4	3	#808285	Non-Neuronal	0.276097	0	0	2.33086	0	0	0	0	0.994938	0	2.65714	0	2.22993	1.60304	0	0	2.44847	0	2.91152	0.276097	2.07613	0	1.41289	0	0	0	0	0	0	0	0	1.03232	0	1.65725
F2S4_170117_003_B01	118	#665C47	Astro Aqp4	3	#808285	Non-Neuronal	2.32097	0	0	2.11924	0	0	0	0	2.99572	0	0	2.58169	0.284702	0	0	0	0	0	2.55563	0.924776	2.69023	0	2.77766	0	0.750586	0	1.87023	0	0	0	0	0	0	0
F2S4_170119_001_A01	118	#665C47	Astro Aqp4	3	#808285	Non-Neuronal	0	0	0	2.32062	2.89343	0	0	0	0.733576	0	2.90152	0	2.39096	1.17551	0	0	2.717	0	2.55192	0.239496	2.60024	0	1.34904	0	0	0	2.52511	2.56949	0	0	0.788911	2.03217	0	0
F2S4_170119_001_C01	118	#665C47	Astro Aqp4	3	#808285	Non-Neuronal	0.255846	0	0	0.955389	1.50911	0	0	0	2.86401	0	2.58765	0	2.51103	0.255846	0.255846	0.415767	2.39045	0	1.81418	1.51976	2.24729	0	1.42612	0	2.05436	0	0	2.15296	0	0	0	2.17911	0	1.67704
F2S4_170119_001_D01	118	#665C47	Astro Aqp4	3	#808285	Non-Neuronal	2.48459	0	0	1.71477	0	0	0	0	2.45795	0	0	0	3.10583	0	0	0	3.11105	0	2.41767	0	1.99595	0	2.34032	0	1.68323	0	0	0	0	2.42514	0	0	0	0
F2S4_170119_001_F01	129	#807059	SMC Acta2	4	#8D1800	Endothelial	2.43487	0	0	1.80963	0	0	0	0	0	0	2.50748	0	2.28796	2.23191	0	0	0	0	2.68966	2.30332	2.60395	0	0	0	0	0	0	0	0	0	0	0	1.76462	1.60612
F2S4_170119_001_G01	118	#665C47	Astro Aqp4	3	#808285	Non-Neuronal	2.17807	0	0	2.28333	0	2.4096	0	0	0.427415	0	2.8236	0	2.76773	2.13406	2.08308	2.53364	2.26921	0	2.40485	0	1.91077	1.87021	2.45443	0	1.54493	0	2.53647	0	0	0	0	2.26659	1.64351	0
F2S4_170119_002_A01	118	#665C47	Astro Aqp4	3	#808285	Non-Neuronal	0	0	0	0	0	0	0	0	1.23906	0	2.89627	0	2.87345	0	0	0	2.75974	0.728961	2.84126	1.72218	2.27752	0	0	0	2.27627	0	0	0	0	0	0	2.42264	1.9479	0
F2S4_170119_002_B01	118	#665C47	Astro Aqp4	3	#808285	Non-Neuronal	2.17379	0	0	2.24097	0	0	0	0	2.65874	0	2.81706	0	2.6207	1.17727	0	0	2.5388	0	3.01834	0	2.26921	0	2.60752	0	0	0	0	0	0	0	0	1.45181	1.96135	0
F2S4_170119_002_C01	118	#665C47	Astro Aqp4	3	#808285	Non-Neuronal	0	0	0	2.41107	0.596628	0	0	0	2.09916	0	2.87952	0.239942	2.65053	0	0	0	2.68162	0.882987	2.78286	0	2.59482	0	2.41231	0	1.95186	0	0	0	0	0	0	0	1.87365	0
F2S4_170119_002_F01	118	#665C47	Astro Aqp4	3	#808285	Non-Neuronal	0	0	0	1.85392	0	0	0	0	0.549725	0	3.17869	0	3.02185	2.14929	0	0	2.21692	0	3.09903	0	2.18682	0	2.84632	0	0	0	0	0	0	0	0	0	2.41327	0
F2S4_170119_003_A01	118	#665C47	Astro Aqp4	3	#808285	Non-Neuronal	0	0	0	0	0	0	0	0	2.5191	0	2.79591	0	2.87671	0	0	1.61623	3.04304	1.5111	1.63036	0	2.64796	0	1.80538	0	0	0	0	0	0	2.39039	0	0	0	0
F2S4_170119_003_B01	118	#665C47	Astro Aqp4	3	#808285	Non-Neuronal	0	0	0	2.36779	2.61272	0	0	0	2.27258	0	2.03891	0	2.78429	1.50466	0	0	2.8704	1.00327	2.87476	1.06734	1.99195	2.05351	2.40856	0	0	0	1.72688	0	0	0	0	1.24427	0	2.38245
F2S4_170119_003_C01	118	#665C47	Astro Aqp4	3	#808285	Non-Neuronal	1.92165	0	0	2.29543	0	0	0	0	2.47941	0	2.76918	2.27926	2.63861	1.45219	0	0	2.7469	0	2.69949	0	2.38342	0	0	0	0.856549	0	0	0	1.53798	0	0	2.61263	1.86133	2.06243
F2S4_170119_003_E01	118	#665C47	Astro Aqp4	3	#808285	Non-Neuronal	2.13507	0	0	1.63687	1.75042	0	0	0	0.175539	0	2.87485	0	2.6467	0	2.18446	0	3.02242	0	2.00908	0	2.29501	0	1.1288	0	2.46447	0	2.45319	0	0	0	0	2.19701	1.57242	2.55705
F2S4_170119_003_F01	118	#665C47	Astro Aqp4	3	#808285	Non-Neuronal	1.70206	0	0	2.11536	0	0	0	0	2.42469	0	2.57086	0	2.67452	1.81034	2.23022	0	3.22579	0	2.57278	0	2.42648	0	1.99875	0	2.17973	1.6973	2.16533	1.45363	0	0	0	0	1.66247	2.48482
F2S4_170119_003_G01	118	#665C47	Astro Aqp4	3	#808285	Non-Neuronal	0	0	0	2.46071	0	1.74626	0	0	2.67372	0	2.75413	0	2.66373	1.74184	0	1.36199	2.89769	1.22543	2.4624	1.98658	2.28282	0	0.857877	0	0	0	1.99161	0	0	0	0	2.48465	1.94132	2.07544
F2S4_170119_003_H01	118	#665C47	Astro Aqp4	3	#808285	Non-Neuronal	0	0	0	2.36889	0	0	0	0	0	0	3.00437	0	2.30581	0	0	0	3.10265	0	2.74508	2.66786	0	0	2.75215	0	0	0	0	0	0	0	0	0	0	0
F2S4_170119_004_C01	118	#665C47	Astro Aqp4	3	#808285	Non-Neuronal	0	0	0	2.21502	0	0	0	0	2.02639	0	2.24909	1.34823	2.80445	1.7783	2.42337	0	2.61588	0	2.73879	0	2.58264	0	2.64195	0	0.206411	0	2.13379	0	0	0	0.850317	0	0	2.66484
F2S4_170119_004_D01	118	#665C47	Astro Aqp4	3	#808285	Non-Neuronal	0	0	0	2.51469	0.219101	0	0	0	0	0	2.21412	0	3.39075	0	2.23618	0	0	0	2.50411	0	2.254	0	2.29633	0	0	0	1.03512	0.219101	0	0	0	0.219101	2.32959	0
F2S4_170119_004_E01	118	#665C47	Astro Aqp4	3	#808285	Non-Neuronal	0	0	0	2.25179	0	0	0	0	3.00222	0	0.227433	0	2.50654	0	0	1.91128	2.74807	0	2.86771	0	1.67943	0	1.69779	0	0	0	0	0	0	2.35421	0	1.46564	0.375932	2.43373
F2S4_170119_004_F01	118	#665C47	Astro Aqp4	3	#808285	Non-Neuronal	0	0	0	1.5668	0	2.29408	0	0	2.89448	0	2.86234	2.15071	2.52092	1.7911	0	0	3.29598	0	2.43785	0	1.69059	0	0	0	1.58777	0	2.59802	0	0	0	0	2.54867	0	0
F2S4_170119_004_H01	129	#807059	SMC Acta2	4	#8D1800	Endothelial	3.02017	0	0	2.46006	1.37608	0	2.42517	0	0	0	2.6963	0	2.36694	1.7455	0	0	0	1.02593	2.14507	0	2.86795	0	0.401087	0	0	0	0	0	0	0	0.177842	2.53156	1.61789	2.90203
F2S4_170119_005_A01	129	#807059	SMC Acta2	4	#8D1800	Endothelial	2.69737	0	0	1.98901	0	0	0	0	0	0	2.95172	0	2.12343	1.84016	0	0	0	2.17034	0	0	2.33187	0	0	0	0	0	2.09616	0	0	2.35379	0	2.74568	2.3257	0
F2S4_170119_005_B01	118	#665C47	Astro Aqp4	3	#808285	Non-Neuronal	0	0	0	0	0	0	0	0	0	0	0.432754	0	2.45168	0	1.42537	0	3.02159	0	2.64944	0	2.81311	0	0.268187	0	0	0	0	0	0	0	0	0.268187	2.03258	0
F2S4_170119_005_C01	118	#665C47	Astro Aqp4	3	#808285	Non-Neuronal	0	0	0	0	0	0	0	0	0	0	2.91527	0	2.94042	2.3036	0	0	0	0	0	0	2.45372	0	2.95368	0	2.82777	2.1042	0	2.26522	0	0	0	0	1.90349	0
F2S4_170209_001_A01	129	#807059	SMC Acta2	4	#8D1800	Endothelial	3.13041	0	0	2.46201	2.39558	2.29887	2.43221	0	0	0	2.77841	0	2.27122	2.08118	0	2.13534	2.15686	1.31697	2.0388	1.1725	2.80135	1.7682	0	0	0	0	0	0	0	0.185745	1.75618	2.11269	1.42518	2.74927
F2S4_170209_001_B01	129	#807059	SMC Acta2	4	#8D1800	Endothelial	2.91361	0	0	2.65271	0	0	0	0	0	0	3.01602	0	2.61098	2.34335	0	0	2.33937	2.08289	2.16774	0	2.80674	0	2.44203	0	0	0	2.08289	0	0	2.10055	0	1.09868	0.478402	0.301991
F2S4_170209_001_C01	129	#807059	SMC Acta2	4	#8D1800	Endothelial	2.75794	0	0.340164	2.48974	0	0	0.841543	0	0	0	2.82696	0	2.8417	2.58267	0	0	0	0	2.25642	0	2.75249	0	2.27049	0	0	0	1.64722	0	0	2.30507	0	2.3557	2.27325	2.7963
F2S4_170209_001_E01	121	#6B998D	Oligo Rassf10	3	#808285	Non-Neuronal	2.06912	0	0	2.49877	0.74152	0	0	0	0	0	3.25092	1.44852	2.88212	1.51325	2.25091	1.67979	0	0.74152	2.53599	1.87464	2.51404	1.77999	0	0	0	0	0	1.52803	0	0	0	2.37351	1.82258	2.37455
F2S4_170209_002_A01	118	#665C47	Astro Aqp4	3	#808285	Non-Neuronal	0.192351	0	0	2.32672	0	0	0	0	2.63466	0	2.87662	0.690247	2.91799	2.46602	0	0	2.82622	0	2.50251	0	2.18187	0	0	0	2.52764	2.11487	0	0	0	0	0	0	0	2.35434
F2S4_170209_002_E01	129	#807059	SMC Acta2	4	#8D1800	Endothelial	2.90791	0	0	2.77149	0.704437	0	0	0	0	0	2.93058	0	2.23467	2.19147	0	0	0	1.35547	1.94958	0	2.8425	0	2.1456	0	0	0	0	0	0	0	0	0.807385	1.74176	0
F2S4_170209_002_H01	129	#807059	SMC Acta2	4	#8D1800	Endothelial	2.89115	0	0	2.40353	0	2.58532	0	0	0	0	2.8862	0	2.30006	2.12024	0	0	0	2.43397	2.64925	2.19563	2.61576	0	0	0	0	0	0.239397	2.33392	0	0	0	2.39718	2.25455	2.60637
F2S4_170209_003_A01	118	#665C47	Astro Aqp4	3	#808285	Non-Neuronal	2.71331	0	0	2.58455	0.228962	0	0	0	2.08063	0	3.09152	0	2.64931	0.228962	0	0	3.22231	0	2.71968	0	2.23142	0	2.11434	0	1.86859	0	0	2.35926	0	0	0	0	2.07559	1.47937
F2S4_170209_003_C01	129	#807059	SMC Acta2	4	#8D1800	Endothelial	3.07868	0	0	2.55892	2.43538	0	0	0	0	0	2.4024	0	2.7943	2.27373	0	0	0	1.69305	1.80462	0	3.1203	0	0	0	0	0	0	0	0	2.32883	0	2.77729	2.37591	2.87492
F2S4_170209_003_D01	129	#807059	SMC Acta2	4	#8D1800	Endothelial	3.23172	0	0	2.46905	0	0	0	0	0	0	3.13703	0	2.79156	0	0	0	0	0	2.25554	0	2.70851	0	1.09681	0	0	0	0	0	0	0	0	2.43471	2.21744	1.78032
F2S4_170209_003_F01	118	#665C47	Astro Aqp4	3	#808285	Non-Neuronal	2.407	0	0	2.51091	0	0	0	0	2.17467	0	0	0	2.01915	2.5647	0	0	3.03656	0	2.69288	0	2.7629	0	0	0	0	0	0	0	0	0	1.50177	0.243051	1.79591	1.73443
F2S4_170209_003_H01	118	#665C47	Astro Aqp4	3	#808285	Non-Neuronal	0	0	2.46162	2.10162	1.92602	0	0	0	3.05824	0	3.20453	0	2.97501	2.50722	0	0	2.76296	0	0.233578	0	2.89025	0	0	0	0	0	2.8537	0	0	0.233578	0	0	1.58829	0.233578
F2S4_170209_004_A01	132	#4C6647	PVM Mrc1	3	#808285	Non-Neuronal	3.15068	0	2.65741	2.62955	0	0	0	0	0	0	2.86727	2.51199	2.7393	0	0	0	3.61008	0	0	0	2.22269	2.47005	0	0	0	0	0	0	0	0	0	0	2.15446	2.52242
F2S4_170209_004_D01	129	#807059	SMC Acta2	4	#8D1800	Endothelial	2.74841	0	0	2.5133	0.196254	0	0	0	0	0	2.74929	0.196254	2.5968	1.8666	0	0	2.22631	1.86321	2.06381	2.26974	2.72193	0	0	0	0	0	0	0	0	2.10272	0	2.16467	2.28673	2.55116
F2S4_170209_004_E01	126	#6B8059	VLMC Spp1 Hs3st6	3	#808285	Non-Neuronal	2.89028	0	0.223901	2.72581	0	0	0.223901	0	0	0	2.91305	1.78076	3.10028	1.86836	0	0	0	1.2836	2.75458	2.34288	2.62035	0	1.60341	0	0	0	0	0	1.1404	0.805941	1.93786	0	1.71822	1.86836
F2S4_170209_005_B01	123	#476662	Oligo Synpr	3	#808285	Non-Neuronal	2.72629	0	0	2.59638	0	0.721714	0	0	0	0	3.48362	1.70892	3.11778	1.97242	0	0	0	1.48213	2.72586	1.33867	2.73192	1.55892	0	0	0	0	0	1.52569	0	1.60155	0	2.41285	1.71343	2.27237
F2S4_170209_005_C01	118	#665C47	Astro Aqp4	3	#808285	Non-Neuronal	2.7084	0	0	2.10302	0	0	0	0	2.74219	0	0	0	2.46048	2.39032	0	0	2.72422	0	2.44733	0	2.35545	0.26985	0	0	2.17866	0	0	0	0	2.3369	0	2.72913	0	0.942157
F2S4_170209_005_D01	129	#807059	SMC Acta2	4	#8D1800	Endothelial	3.06247	0	0	2.53123	0	0	0	0	0	0	3.16236	0	2.81819	2.35076	0	0	0	1.83593	0.192612	0.638384	2.58673	0	0	0	0	0	0	0	0	0	0.192612	0	2.01108	0.638384
F2S4_170209_005_E01	119	#476655	OPC Pdgfra Grm5	3	#808285	Non-Neuronal	2.58463	0	0	2.00786	0	0.211186	0	0	0	0	3.08018	0	3.04877	2.55383	0	0	0.211186	0	2.84619	1.45568	2.7752	2.37949	2.69084	0	0.459202	0	0	0	0	0	2.72442	0.459202	1.88522	1.26799
F2S4_170209_005_G01	118	#665C47	Astro Aqp4	3	#808285	Non-Neuronal	0	0	0	2.09361	0	0	0	0	1.94671	0	2.62293	0	2.6685	1.51496	0	0	2.5693	1.8093	0	0	2.54123	0	2.16812	0	0	0	2.36188	0	0	0	0	2.52145	1.64679	1.57257
F2S4_170209_006_A01	118	#665C47	Astro Aqp4	3	#808285	Non-Neuronal	2.07519	0	0	2.20685	0	0.286844	0	0	3.1259	0	2.92446	2.71471	3.05718	0	0	0	0.286844	1.54016	1.97145	0	2.05418	0	2.23138	0	0.286844	0	0	0	0	0	0	0.286844	1.20335	2.78478
F2S4_170209_006_B01	118	#665C47	Astro Aqp4	3	#808285	Non-Neuronal	0	0	0	2.00464	1.5791	0	0	0	0	0	2.54521	0.223141	2.56152	1.95258	0	2.11379	3.10828	1.78373	0	0	1.93937	0	0	0	1.79322	1.82491	0	0	0	0	0	0.223141	2.16656	2.49504
F2S4_170209_006_F01	118	#665C47	Astro Aqp4	3	#808285	Non-Neuronal	0	0	0	2.54713	2.03657	0	0	0	0	0	0.581128	0	2.76779	0.458566	0	0	3.20766	0	2.97964	1.69668	2.66212	0	1.77849	0	0	0	2.47026	1.87531	0	0	0	0	0	0
F2S4_170209_006_G01	118	#665C47	Astro Aqp4	3	#808285	Non-Neuronal	0	0	0	2.62776	0	0	0	0	2.40301	0	2.90167	0	3.01095	2.1534	0	0	3.17202	0	2.90205	1.46229	2.96273	0	0.230402	0	0	0	0	0	0	0	0	2.34936	1.45168	0
F2S4_170209_007_D01	132	#4C6647	PVM Mrc1	3	#808285	Non-Neuronal	2.94389	0	2.43527	2.16687	0	1.85262	0	0	0	0	2.56143	0	3.1207	0	0	0	3.95815	0	2.79862	0	0	1.74051	0	0	0	0	0	0	0	0	0	0	2.10241	2.74299
F2S4_170209_007_F01	118	#665C47	Astro Aqp4	3	#808285	Non-Neuronal	0.204359	0	0	2.39544	0	0	0	0	1.58268	0	2.58474	0	2.72261	2.22543	0	2.48947	2.72704	0	2.70444	0	2.5567	0	0.663257	0	0.204359	0	2.21759	0	0	0	0.881367	0	2.22852	2.28754
F2S4_170209_007_G01	129	#807059	SMC Acta2	4	#8D1800	Endothelial	3.13724	0	0	2.04442	0	0	0	0	0	0	3.10319	0	2.7174	1.84792	0	0	0	1.86552	0	0	3.00382	0	2.1258	0	0	0	0	0	0	0	0.468763	2.1258	1.94658	2.53644
F2S4_170209_007_H01	129	#807059	SMC Acta2	4	#8D1800	Endothelial	2.2815	0	0	1.95405	0	0	0.97106	0	0	0	3.08755	0	2.66001	2.31273	0	0	0	1.26012	2.37188	0	2.76598	0.538756	0	0	0	0	0	0	0	0	0	0	1.48415	2.63304
F2S4_170221_001_B01	118	#665C47	Astro Aqp4	3	#808285	Non-Neuronal	0	0	0	1.96543	0	0	0	0	1.31493	0	3.25266	0	2.7724	2.50971	1.4402	0.185003	3.29977	0	2.72643	0	2.21073	0	1.91797	0	0.761919	0	0	0	0	0	0	0	1.83537	0
F2S4_170221_003_H01	118	#665C47	Astro Aqp4	3	#808285	Non-Neuronal	0.173704	0	0	2.42419	0	0	0	0	2.65886	0	2.48628	0	2.6056	2.22963	0	0	3.32159	1.12367	2.91941	1.63145	0	0.173704	0	0	0	0	0	0	0	2.32628	0	2.61503	0	2.93655
F2S4_170221_006_A01	118	#665C47	Astro Aqp4	3	#808285	Non-Neuronal	2.61896	0	0	2.15735	0	0	0	0	0	0	2.81643	0	2.72213	0	0	0	2.18843	0	0	0	2.8071	0.26005	0.82862	0	1.82343	2.24055	0	0	0	0	0	0	0	2.44553
F2S4_170221_006_B01	118	#665C47	Astro Aqp4	3	#808285	Non-Neuronal	0.351328	0	0	2.34896	0	0	0	0	0	0	3.2258	0	2.89801	2.25465	0	2.28374	0	0.776868	2.95349	0	1.83812	0	1.34586	0	0	0	0	0	0	2.51747	0	0.210262	1.58396	0.210262
F2S4_170221_007_C01	118	#665C47	Astro Aqp4	3	#808285	Non-Neuronal	0.333048	0	0	2.2433	0	0	0	0	0.898622	0	2.70811	0	3.01214	0	0	0	2.91179	0	2.38171	0.333048	2.73381	0	0	0	0.519308	0	0	0	0	0	0	0	0	0
F2S4_170221_007_D01	118	#665C47	Astro Aqp4	3	#808285	Non-Neuronal	0	0	0	1.8161	0	0	0	0	0	0	2.26408	0	2.71056	2.15085	0	0	0	1.82693	1.33578	0	2.58869	0	2.62336	0	0	0	1.68971	0	0	0	0	0.423786	1.62667	0.541573
F2S4_170221_007_E01	118	#665C47	Astro Aqp4	3	#808285	Non-Neuronal	0	0	0	0	0	0.276901	0	0	0	0	2.26864	0	2.469	2.00001	0	0	0	0	3.09865	1.6047	2.69783	0	2.34673	0	2.07129	2.01523	2.42617	0	0	0	0	0	1.29513	1.95085
F2S4_170221_007_G01	118	#665C47	Astro Aqp4	3	#808285	Non-Neuronal	0	0	0	2.41542	0	0	0	0	2.80809	0	2.3485	2.33958	2.34495	2.49026	2.64589	0	3.02523	0	2.82076	0	2.77236	0.280242	0.449176	0	0	0	0	0	1.78412	0	0	2.70951	0	2.50895
F2S4_170221_007_H01	118	#665C47	Astro Aqp4	3	#808285	Non-Neuronal	0	0	0	2.10409	0	0	0	0	0	0	2.8992	0.404422	2.44846	0.247678	1.92839	0	3.00086	0.404422	3.17435	0	0.247678	0	1.61255	0	0.854329	0	0	0	0	0	0	0	0	2.0988
F2S4_170221_009_A01	118	#665C47	Astro Aqp4	3	#808285	Non-Neuronal	0	0	0	1.97744	0	1.15558	0	0	0	0	2.59547	0	2.49602	0	0	0	2.73893	0	2.94838	0	2.40725	0	1.52992	0	2.65354	0	2.4515	0	0	0	0	0.251107	0.251107	2.4527
F2S4_170221_009_E01	118	#665C47	Astro Aqp4	3	#808285	Non-Neuronal	0	0	0	2.46078	2.71367	0	0	0	0	0	0	0	2.87985	0	0.215176	0	3.19629	0	2.29917	0.685519	2.74683	0.215176	2.45202	0	1.7393	0	0	0	0	0.358412	0	2.43701	0	1.62366
F2S4_170221_009_G01	118	#665C47	Astro Aqp4	3	#808285	Non-Neuronal	0	0	0	2.51996	2.45087	0.328873	0	0	2.56707	0	2.82219	0	2.68177	0	0	0	3.27734	0	3.11542	1.5221	2.51548	0	1.75196	0	0	0	2.23978	0	0	0	0	0	0	0
F2S4_170221_010_D01	118	#665C47	Astro Aqp4	3	#808285	Non-Neuronal	0.220497	0	0	0	0	0	0	0	2.47807	0	0	0	2.74816	2.26537	0	0	3.10303	0	2.4847	0	2.48092	2.66095	2.09355	0	0	0	0	0	0	0	0	0	0	0
F2S4_170221_010_E01	118	#665C47	Astro Aqp4	3	#808285	Non-Neuronal	2.40487	0	0	2.34122	0	0	0	0	2.14463	0	2.93367	0	2.89498	1.87992	1.82909	0	3.29221	0	2.40007	0.886632	2.44758	0	1.2063	0	0	0	2.34671	1.43539	0	0	0	2.47524	1.62667	0
F2S4_170221_011_E01	118	#665C47	Astro Aqp4	3	#808285	Non-Neuronal	2.2756	0	0	2.48185	0	2.74526	0	0	0	0	2.55326	0	2.27879	0.229147	0	0	2.67853	0	0	0	0.378365	0	2.72242	0	2.75545	0	2.43459	1.59351	0	0	0	2.28977	0	0.229147
F2S4_170307_001_C01	129	#807059	SMC Acta2	4	#8D1800	Endothelial	3.19705	0	0	2.84379	0	1.87903	0	0	0	0	3.21548	0	3.05584	2.46379	0	0	0	0	0	0	2.97403	0	0	0	0	0	0	0	0	0	0	2.38509	1.64855	0
F2S4_170308_001_A01	127	#74996B	VLMC Spp1 Col15a1	3	#808285	Non-Neuronal	2.55033	0	0	2.7978	0	0	0	0	0	0	3.02425	0.199045	3.0012	2.64742	0	0	0	0	2.7814	1.65502	2.53366	0	3.21485	0	0	2.25825	2.71325	0	0	0	0	2.81126	0	1.08087
F2S4_170308_001_B01	127	#74996B	VLMC Spp1 Col15a1	3	#808285	Non-Neuronal	0	0	0	2.41834	0	0	0	0	0	0	2.97111	1.10397	2.73099	2.72385	0	0	2.34103	1.39786	2.9065	0	2.53502	0	2.74585	0	0	0	2.78006	0	0	0	0	0	2.09102	2.58339
F2S4_170308_002_A01	130	#997F7A	Endo Ctla2a	4	#8D1800	Endothelial	3.36484	0	0	2.98178	0	0	3.16601	0	0	0	3.24725	0	2.99351	2.14027	0	0	3.59288	0	0.295018	0	2.66002	0	0	0	2.57675	0	0	0	0	0	3.0066	0.295018	2.64497	0
F2S4_170308_002_B01	130	#997F7A	Endo Ctla2a	4	#8D1800	Endothelial	2.63589	0	0	0	2.14835	0	0	0	0	0	3.38955	0	3.33431	0	0	0	0	0	0	0	2.71552	0	0	0	2.83406	0	0	0	0	0	0	0	0	0
F2S4_170308_002_C01	127	#74996B	VLMC Spp1 Col15a1	3	#808285	Non-Neuronal	2.27787	0	0	2.68388	0	0	0	0	0	0	2.87197	0	2.22744	2.60183	0	0	2.65748	0	2.83448	2.38924	2.13999	0	2.65081	0	0	0	1.66672	0.247937	0	0	0	0	1.8877	2.75757
F2S4_170308_002_E01	127	#74996B	VLMC Spp1 Col15a1	3	#808285	Non-Neuronal	0	0	0	2.54176	0	0	0	0	0	0	3.19902	0	2.3877	2.43441	1.39238	0	3.1235	0	0.197999	0.519885	2.2281	0	3.35088	0	0	0	0	1.5305	0	2.53229	0	0	2.11906	0.197999
F2S4_170308_002_F01	127	#74996B	VLMC Spp1 Col15a1	3	#808285	Non-Neuronal	2.43555	0	0	2.69859	0	0	0	0	0	0	2.97847	0	2.8983	2.32165	0	0	0.16308	0	2.93244	2.23642	2.25989	0	3.02273	0	0	0	2.42822	2.01701	0	0	0	0	0	2.44772
F2S4_170308_002_G01	130	#997F7A	Endo Ctla2a	4	#8D1800	Endothelial	3.03862	0	0	2.87061	0	2.48587	0	0	0	0	2.74905	0	3.28943	2.58891	0	0	3.53633	0	2.78683	0	2.79957	0	0.281204	0	0	0	0	0	0	0	0	0	0	0.571972
F2S4_170308_002_H01	127	#74996B	VLMC Spp1 Col15a1	3	#808285	Non-Neuronal	2.08693	0	0	2.77867	0	0	0	0	0	0	2.89359	0	2.96478	2.50773	2.24193	0	2.90156	0.951948	2.30063	2.84095	2.08859	0	2.94494	0	0	0	0.166667	0	0	0.675997	0	2.36828	1.74611	0.166667
F2S4_170308_003_A01	127	#74996B	VLMC Spp1 Col15a1	3	#808285	Non-Neuronal	2.49407	0	0	2.25793	0	0	0	0	0	0	0.267066	0	2.66333	1.04901	0	0	2.59774	0	2.98768	0	0	0	2.32044	0	0	0	2.57772	2.68672	0	0	0	0	0	2.20835
F2S4_170308_003_B01	130	#997F7A	Endo Ctla2a	4	#8D1800	Endothelial	2.99018	0.204593	0	2.36898	0	0	0	0	0	0	2.96514	0	2.57921	2.29218	0	0	3.45781	0	0	0	2.76827	0	0	0	0	0	0	0	0	2.43036	2.65195	0	1.65251	2.56663
F2S4_170308_003_C01	130	#997F7A	Endo Ctla2a	4	#8D1800	Endothelial	2.64357	0	0	2.65446	0	0	0	0	0	0	3.06401	0	2.76863	2.15427	0	0	3.33341	1.08575	0	0	2.60674	0	0	0	0.241927	0	0	0	0	0	1.65308	2.56385	1.73781	0
F2S4_170308_003_D01	127	#74996B	VLMC Spp1 Col15a1	3	#808285	Non-Neuronal	2.58824	0	0	2.5733	1.98514	0	0	0	0	0	3.00478	0	2.46611	2.66231	0	0	0	1.61233	2.92298	0	2.50693	0	2.58009	0	0	0	2.56486	0	0	0	0	2.33019	2.06061	0
F2S4_170308_003_E01	130	#997F7A	Endo Ctla2a	4	#8D1800	Endothelial	2.31769	0	0	2.73204	0	0	0	0	0	0	0	0	0	2.18627	0	0	3.52928	0	0	0	2.65956	0	0	0	1.15565	0	0	2.60682	0	2.66824	0	2.7345	2.02299	2.2143
F2S4_170308_003_F01	127	#74996B	VLMC Spp1 Col15a1	3	#808285	Non-Neuronal	0	0	0	2.68659	1.61921	2.66188	0	0	0	0	2.602	0	3.09746	2.54379	2.79595	0	2.62289	0	0	2.2181	2.45345	0	3.26478	0	0	0	2.83062	2.3646	0	2.91905	0	1.66641	2.24695	0
F2S4_170308_003_G01	127	#74996B	VLMC Spp1 Col15a1	3	#808285	Non-Neuronal	2.79411	0	0	2.63443	2.75541	0	0	0	0	2.67935	3.07048	0	2.68867	2.3923	0	0	2.94198	0	2.37029	0.206789	2.15563	0	2.98352	0	0	0	2.58913	0	0	1.36088	1.34918	0	1.79655	0
F2S4_170308_003_H01	127	#74996B	VLMC Spp1 Col15a1	3	#808285	Non-Neuronal	2.47591	0	0	3.14551	0	0	0	0	0	0	3.15405	0	2.79958	2.09675	0	0	0	0	2.39521	2.59541	2.63857	0	1.93545	0	0	0	0.169848	0	0	0	0	0	2.10986	2.75445
F2S4_170308_004_A01	127	#74996B	VLMC Spp1 Col15a1	3	#808285	Non-Neuronal	2.33228	0	0.160348	2.35769	2.12594	0	0	0	0	0	3.02999	0	2.53315	2.65002	2.36862	0	3.14005	0	2.77352	1.1583	1.50869	0	2.9301	0	0	1.35952	2.55042	0	0	0	1.27563	2.07844	1.50869	1.95363
F2S4_170308_004_B01	127	#74996B	VLMC Spp1 Col15a1	3	#808285	Non-Neuronal	0	0	0	2.27482	0	0	0	0	0	0	2.52968	0	3.04072	2.57246	0.170326	0	3.04186	0	2.78936	0	1.93691	0	2.41067	0	0	0	2.95631	0	0	0	0	2.40332	1.92961	2.30166
F2S4_170308_004_E01	130	#997F7A	Endo Ctla2a	4	#8D1800	Endothelial	2.73098	0	0	2.74566	0	0	0	0	0	0	0.256301	0	2.40816	0	0	0	3.07924	1.38603	2.54213	0	2.45715	0	2.462	0	0	0	0	0	0	2.9968	0	2.60718	2.05228	3.10412
F2S4_170308_004_G01	127	#74996B	VLMC Spp1 Col15a1	3	#808285	Non-Neuronal	2.44759	0	0	2.43605	0	0	2.63013	0	0	0	3.42077	0	2.7313	2.80299	0	0	0	0	2.98423	0	0	0.194609	2.93637	0	0	0	2.66388	0	0	2.37635	0	2.61905	1.98472	3.12278
F2S4_170308_004_H01	127	#74996B	VLMC Spp1 Col15a1	3	#808285	Non-Neuronal	0	0	0	2.14808	0	0	0	0	2.02809	0	2.70356	0	3.01875	2.32144	0	0	2.92956	1.05705	2.92109	0	1.97605	0	0.964426	0	0	0	2.97443	2.23651	0	2.38663	0	2.84762	0.18965	2.21675
F2S4_170308_005_A01	127	#74996B	VLMC Spp1 Col15a1	3	#808285	Non-Neuronal	2.3014	0	0	3.13121	0	0	0	0	0	0	3.09083	0	0.668497	2.75022	2.07515	0	2.99349	0	2.97368	0	1.91913	0	2.80585	0	1.5117	0	2.60134	0	0	0	1.48129	0	2.20384	0.238608
F2S4_170324_001_A01	130	#997F7A	Endo Ctla2a	4	#8D1800	Endothelial	3.02232	0	0	0	0	0	0	0	0	0	0	0	2.88829	0.199304	2.28069	0	2.88567	0	0	0	2.58652	0	0	0	0	0	0	0	0	0.592375	0	0	0	0
F2S4_170324_001_B01	128	#665547	Peri Kcnj8	4	#8D1800	Endothelial	2.62672	0	0	2.10321	0	0	0	0	0	0	2.70678	0	2.37849	2.40718	2.89686	2.59862	0	0	2.60819	0	2.62811	0	0	0	0	0	0	2.22437	2.90281	0	1.68673	0	2.15785	2.33567
F2S4_170324_001_D01	125	#89997A	VLMC Osr1 Mc5r	3	#808285	Non-Neuronal	2.34012	0	0	2.56992	0	0	0	0	0.234661	0	2.77402	0	2.55109	1.96381	0	0	0	0	1.51227	0	2.03537	0	2.10664	0	0	0	0	0	0	0	0	2.51744	2.61447	0
F2S4_170324_001_E01	119	#476655	OPC Pdgfra Grm5	3	#808285	Non-Neuronal	0	0	0	1.0451	0	0	0	0	0	0	3.11861	0	2.6778	0	0	0	0	0	1.29305	0	1.4732	0	2.33774	0	0	2.00504	0	0	0	2.55317	0	2.63777	0	1.74315
F2S4_170324_001_F01	129	#807059	SMC Acta2	4	#8D1800	Endothelial	2.93791	0	0	2.38496	0	0	0	0	0.184008	0	3.00467	0	3.05874	2.47273	0	0	0	1.63022	2.4124	2.85292	2.83285	0	1.06265	0	0	0	2.14043	0	0	0	0	2.42378	1.66627	1.86499
F2S4_170324_001_H01	125	#89997A	VLMC Osr1 Mc5r	3	#808285	Non-Neuronal	2.71158	0	0	2.76393	0	0.196829	0	0	0	0	0	0	2.94077	2.19099	0.196829	0	2.58499	0.434583	2.99237	0	2.83824	0	2.16793	0	0	0	2.28573	0	0	0	0	0	2.20828	0
F2S4_170324_002_A01	118	#665C47	Astro Aqp4	3	#808285	Non-Neuronal	0	0	0	2.18443	0	0	0	0	2.9077	0	2.98859	0.386158	2.65623	1.89819	0	0	2.69997	1.97382	2.68544	2.57984	1.9604	0	1.74396	0	0.872092	1.86126	2.07377	1.27677	0	0	0	0	2.29991	2.35547
F2S4_170324_002_B01	129	#807059	SMC Acta2	4	#8D1800	Endothelial	3.15464	0	0	2.68611	0	0	0	0	0	0	2.82841	0	2.90612	2.01149	2.79146	0	0	0	1.88885	2.18528	2.53005	0	0	0	0	0	0	0	0	0	0	2.62752	1.9665	2.23909
F2S4_170324_002_C01	125	#89997A	VLMC Osr1 Mc5r	3	#808285	Non-Neuronal	3.18379	0	0	2.71417	0	0	0	0	0	0	2.95656	0	2.78671	2.60438	0	0	2.96388	0	2.60238	2.44671	0	0	2.57269	0	0	0	0	2.56476	0	0	0	0	1.98392	0
F2S4_170324_002_E01	125	#89997A	VLMC Osr1 Mc5r	3	#808285	Non-Neuronal	2.70101	0	0	0	0	0	0	0	0	0	0	0	2.88244	1.92804	0	0	2.86441	0	0	1.95376	0	0	2.56459	0	0	0	0	0	0	0	0	0	0	2.79757
F2S4_170324_002_F01	118	#665C47	Astro Aqp4	3	#808285	Non-Neuronal	0	0	0	2.42113	0	0	0	0	2.34846	0	2.77712	0.380415	3.02855	0	0	0	3.08285	0	2.78568	0	2.47017	0	0.230593	0	0	2.27589	0	0	0	2.59629	0	2.8478	2.47732	0
F2S4_170324_002_G01	125	#89997A	VLMC Osr1 Mc5r	3	#808285	Non-Neuronal	0	0	0	2.58903	0	0	0	0	0	0	2.55811	0	2.37696	2.35815	0	0	0.23578	0	2.92737	2.69703	2.30258	0	2.07905	0	0	0	2.31031	0	0	0	0	0	1.57716	1.58537
F2S4_170324_002_H01	133	#598069	Microglia Siglech	3	#808285	Non-Neuronal	2.75667	0	0	2.29762	0	0	0	0	0	0	3.35872	0	2.44958	0.241109	0	0	3.27986	0	0	2.7429	1.70527	0	1.13412	0	0	0	0	0	0	0	0	0	2.48158	0
F2S4_170324_003_A01	118	#665C47	Astro Aqp4	3	#808285	Non-Neuronal	0	0	0	1.21664	0	0	0	0	0.76972	0	2.90466	0	2.28217	0	0	0.920486	3.00488	1.32945	2.56024	2.62688	2.42019	0	2.79617	0	0	0	2.49753	0	0	0	0	0	0	0
F2S4_170324_003_C01	118	#665C47	Astro Aqp4	3	#808285	Non-Neuronal	0.225653	0	0	1.88051	0	0	0	0	2.71329	0	2.71329	0	3.04353	0	0.761123	0	2.97244	0	2.96223	2.3068	2.22335	0	2.14821	0	0	0	0	0	0	2.34319	0	0	1.69945	0
F2S4_170324_003_D01	126	#6B8059	VLMC Spp1 Hs3st6	3	#808285	Non-Neuronal	2.77506	0	0	2.82192	0	0	0	0	0	0	2.81377	0	2.47419	2.16211	0	0	0	0.940211	2.18459	2.11335	2.50979	0	0.248313	0	0	0	0	0	0	2.27162	1.01101	0	1.79197	1.83811
F2S4_170324_003_E01	133	#598069	Microglia Siglech	3	#808285	Non-Neuronal	2.8463	0	0	2.59701	0	0	0	0	0	0	2.2528	0	2.97902	0	0	0	2.88391	0	0	2.61057	1.29704	0	2.63334	0	0	0	0	0.251406	0	0	0	0	0	2.59094
F2S4_170324_003_F01	119	#476655	OPC Pdgfra Grm5	3	#808285	Non-Neuronal	0	0	0	1.82487	0	0	0	0	0	0	2.85182	0	3.20726	2.20809	2.4352	0	0.240423	0	2.49461	2.51764	2.2061	0	2.75619	0	1.90377	0	0	0	0	0	0	0	0	1.30593
F2S4_170324_003_G01	133	#598069	Microglia Siglech	3	#808285	Non-Neuronal	3.06626	0	0	0.308068	0	0	0	0	0	0	3.36168	0	1.2436	0	0	0	3.3542	0	0	0	0	0	2.24688	0	0	0	0	0	0	0	0	0	0	0
F2S4_170324_003_H01	125	#89997A	VLMC Osr1 Mc5r	3	#808285	Non-Neuronal	2.64149	0	0	2.74084	0	0	2.46175	0	0	0	2.92558	0	2.7382	0	0	0	2.95907	0	2.62635	2.25803	2.16221	0	2.73754	0	0	0	0	0	0	0	0	0	0	2.56875
F2S4_170324_004_B01	133	#598069	Microglia Siglech	3	#808285	Non-Neuronal	3.14851	0	0	2.41632	0	0	0	0	0	0	3.03994	0	2.76722	0	0	0	3.65898	0	2.57542	0	0	0	2.62727	0	0	0	0	0	0	0	1.39538	2.13681	2.05867	1.48651
F2S4_170324_004_C01	118	#665C47	Astro Aqp4	3	#808285	Non-Neuronal	0	0	0	2.01567	0	0	0	0	1.91981	0	2.44247	0	3.04912	0	0	0	2.68923	0	3.10467	2.30055	2.62231	0	2.7064	0	2.12997	0	0	0	0	0	0	0	0	2.81285
F2S4_170324_004_D01	118	#665C47	Astro Aqp4	3	#808285	Non-Neuronal	0.233827	0	0	2.29637	0	2.65288	0	0	2.49907	0	3.06019	0.659572	0.233827	0	0.722606	0	2.57043	0	2.79991	0	0	0	1.547	0	0	0	2.37623	1.70697	0	0	0	1.72484	0	0
F2S4_170324_004_E01	126	#6B8059	VLMC Spp1 Hs3st6	3	#808285	Non-Neuronal	2.22275	0	0	3.00909	0	0	0	0	0	0	3.05745	0	2.41905	1.93049	0	0	0	0	3.09876	0	2.67373	0	0.820464	0	0	0	2.41639	0	0	2.4547	0	0	0	2.47501
F2S4_170324_004_F01	119	#476655	OPC Pdgfra Grm5	3	#808285	Non-Neuronal	0	0	0	0	0	0	0	0	0	0	0.277326	0	2.90745	2.25897	0	0	0.277326	0	0	0	2.12475	2.96284	1.82115	0	0	0	0	0	0	0	0	0	0	2.58582
F2S4_170324_004_G01	125	#89997A	VLMC Osr1 Mc5r	3	#808285	Non-Neuronal	2.62462	0	0	2.19827	0	0	0	0	0	0	2.97848	0	2.75279	0	0	0	2.81121	1.65454	2.62949	0	2.65241	1.57598	2.47384	0	0	0	0	0	0	0	0	1.39387	0	2.5889
F2S4_170324_004_H01	133	#598069	Microglia Siglech	3	#808285	Non-Neuronal	2.97953	0	0	0	0	0	0	0	0	0	0	0	2.86623	0	0	0	3.14325	0	2.83239	2.15031	2.32939	0	0.947939	0	0	0	0	0	0	0	0	2.65662	1.81474	2.89509
F2S4_170324_011_A01	118	#665C47	Astro Aqp4	3	#808285	Non-Neuronal	0	0	0	0.200394	0	0	0	0	1.81622	0	2.75746	0	2.99026	2.44912	0	0	3.36745	0	2.77619	0	0.200394	0	1.01625	0	2.60491	0	2.25769	0	0	0	0	0	0	0.524438
F2S4_170324_011_C01	133	#598069	Microglia Siglech	3	#808285	Non-Neuronal	3.22417	0	0	2.25841	0	0	0	0	0	0	2.79583	0.217108	2.73184	0	0	0	3.02562	0	2.34157	0	0.217108	0	2.80739	0	0	0	0	0	1.84756	0.791591	0	0	2.10097	0
F2S4_170324_011_D01	133	#598069	Microglia Siglech	3	#808285	Non-Neuronal	2.66407	0	0	0	0	0	0	0	0	0	2.88724	0	2.84872	0	0	0	3.13149	0	2.82448	0	0	0	1.41621	0	0	0	0	0	0	2.87692	2.68455	0	0	3.08483
F2S4_170324_011_E01	118	#665C47	Astro Aqp4	3	#808285	Non-Neuronal	1.10314	0	0	2.2739	0	0	0	0	2.69825	0	2.44651	2.68168	2.54438	2.21624	0	2.53781	2.87659	0	2.5731	0	2.57848	0	2.44741	0	0.199762	0	1.89905	0	0	0	0	2.3089	0.199762	2.366
F2S4_170324_011_H01	122	#6C8581	Oligo Serpinb1a	3	#808285	Non-Neuronal	0	0	0	2.68351	0	0	0	0	0	0	2.45061	0	2.61498	2.67923	0	0	0	0	2.35408	0	2.627	0	0	0	0	0	0	0	0	0	1.64963	1.34295	1.55895	1.89652
F2S4_170324_012_B01	133	#598069	Microglia Siglech	3	#808285	Non-Neuronal	3.26182	0	0	2.33659	0	0	0	0	0	0	3.01073	0	2.60357	0	0	0	3.3784	0	3.2491	0	0.179554	0	0	0	0	0	0	0	0	0	2.71786	2.79169	2.53532	0
F2S4_170324_012_C01	130	#997F7A	Endo Ctla2a	4	#8D1800	Endothelial	0	0	0	0	0	0	0	0	0	0	0	0	0	0	0	0	3.51724	0	0	0	0	0	0	0	0	0	0	0	0	0	0	3.39018	2.21221	0
F2S4_170324_012_D01	118	#665C47	Astro Aqp4	3	#808285	Non-Neuronal	2.44085	0	0	2.00093	1.77787	0	0	0	2.15967	0	2.54506	2.25014	2.85964	1.99099	0	0	3.04285	0	2.51828	0	2.22005	0	2.50463	0	0	0	2.67039	0	0	0	0	2.54083	0	0
F2S4_170324_012_E01	133	#598069	Microglia Siglech	3	#808285	Non-Neuronal	3.36275	0	0	2.68972	0	1.78455	0	0	0	0	2.63636	0	2.73152	0.19018	0	0	3.14797	1.64205	2.64347	0	0.19018	0	1.30602	0	0	0	0	0	0	0	2.69409	0	1.83622	2.14102
F2S4_170324_012_F01	133	#598069	Microglia Siglech	3	#808285	Non-Neuronal	2.4809	0	0	0.378974	0	0	0	0	0	0	2.87657	0	0	0	0	0	3.15206	0	2.8423	1.3404	0.229576	0	3.08612	0	0	0	0	0	3.10363	2.73476	1.5626	0	0	0.229576
F2S4_170324_012_G01	133	#598069	Microglia Siglech	3	#808285	Non-Neuronal	3.25915	0	0	2.12624	0	0	0	0	0	0	3.10035	0	2.67673	0	0	0	3.35889	1.58375	0.332277	0	0	0	1.9347	0	0	0	0	0	0	0.19717	0	0	1.79174	1.96005
F2S4_170324_012_H01	129	#807059	SMC Acta2	4	#8D1800	Endothelial	2.72116	0	0	2.49174	0	0	0	0	0	0	3.02767	0	2.7011	2.58214	0	0	0	1.40312	1.8621	2.03399	3.00051	0	0	0	0	0	0	0	0	2.30063	0	0.506382	2.11838	2.16673
F2S4_170324_013_A01	118	#665C47	Astro Aqp4	3	#808285	Non-Neuronal	0	0	0	2.51225	0	0	0	0	2.2865	0	2.48479	0	2.79536	0	0	0	3.05756	1.90288	0	0	2.54573	0	2.87638	0	0	2.30006	0	0	0	0	1.39384	2.72362	0	0.247142
F2S4_170324_013_B01	130	#997F7A	Endo Ctla2a	4	#8D1800	Endothelial	3.00354	0	0	2.46384	0	0	0	0	0	0	0	0	2.30409	0	0	0	1.63133	1.6483	0	2.30225	3.24223	0	0	0	0	0	0	0	0	2.7913	2.1817	1.58574	2.07442	2.12447
F2S4_170324_013_C01	118	#665C47	Astro Aqp4	3	#808285	Non-Neuronal	0	0	0	2.19241	0	0	0	0	0.50802	0	2.9602	0.24065	2.9246	0	2.48579	0	2.73002	0	2.63614	0	2.75048	0	2.16909	0	0	1.39257	0	0	0	0	0	1.97447	0	2.33833
F2S4_170324_013_D01	118	#665C47	Astro Aqp4	3	#808285	Non-Neuronal	0	0	0	2.02855	0	0	0	0	3.08468	0	2.73138	0	3.00218	1.90588	0	0	3.0048	2.17194	0	0	2.74051	0	0	0	0	0	1.3786	0	0	0	0	0	1.54024	0.223718
F2S4_170324_013_E01	122	#6C8581	Oligo Serpinb1a	3	#808285	Non-Neuronal	0	0	0	2.8014	0	1.92471	0	0	0	0	2.9938	0	3.00843	0.942229	0	0.19142	0	0.323825	2.01248	2.61837	2.85963	0	0	0	0	0	0	0	0	0	0.688173	2.94477	1.62882	3.11648
F2S4_170324_013_F01	133	#598069	Microglia Siglech	3	#808285	Non-Neuronal	0	0	0	0	0	0	0	0	0	0	0	0	0.202276	0.202276	0	0	3.50049	0	0	0.202276	2.22911	0	1.32571	0	0	0	0	0	0.202276	0	0	0	2.37602	2.47881
F2S4_170324_013_G01	118	#665C47	Astro Aqp4	3	#808285	Non-Neuronal	0	0	0	2.12529	0	0	0	0	0.214795	0	0	0	2.99402	1.89794	0	2.52915	0	0	3.01706	1.96006	1.84572	0	1.92519	0	2.66252	0	2.043	0	0	0	0.214795	0	1.99796	0
F2S4_170324_013_H01	119	#476655	OPC Pdgfra Grm5	3	#808285	Non-Neuronal	2.62796	0	0	1.79777	0	1.56644	0	0	0	0	2.85311	0	3.03644	2.21113	1.50361	2.24375	0	1.05992	2.67192	0	2.45575	1.59169	1.92289	0	0	0	0	0	0	0	2.23686	0	1.56644	0.424004
F2S4_170324_014_A01	118	#665C47	Astro Aqp4	3	#808285	Non-Neuronal	0	0	0	1.94633	0	0	0	0	2.31047	0	0	0	2.45968	2.18217	0	0	2.99691	0	2.74734	0.91179	0.91179	0	2.46076	0	0	0	2.6935	0	0	2.33127	0	0	1.98663	2.34973
F2S4_170324_014_B01	118	#665C47	Astro Aqp4	3	#808285	Non-Neuronal	1.99121	0	0	2.10413	0	0	0	0	2.30592	0	2.21983	0	2.59798	0	0	1.97142	3.13567	1.20505	2.47675	2.20035	2.29645	0	1.43439	0	1.26621	1.68163	2.37152	2.28018	0	1.84427	0	2.04187	1.14905	0
F2S4_170324_014_C01	119	#476655	OPC Pdgfra Grm5	3	#808285	Non-Neuronal	0	0	0	2.68438	1.85568	0	0	0	0	0	3.11627	0	3.13008	2.24526	1.95864	0	0	1.9766	2.04397	1.64654	2.42188	0	2.72703	0	0	0	0	0	0	0	1.09739	0	1.86876	3.0365
F2S4_170324_014_D01	133	#598069	Microglia Siglech	3	#808285	Non-Neuronal	3.05937	0	0	0	1.73531	0	0	0	0	0	3.03867	0	0	0.2383	0	0	0	0	1.30117	0	0.2383	0	2.79962	0	0	0	0.2383	0	0	0	0	0	1.88663	2.02038
F2S4_170324_014_E01	118	#665C47	Astro Aqp4	3	#808285	Non-Neuronal	0	0	0	2.41885	0	0	0	0	0	0	0.240628	0	2.38839	0	0	0	2.78182	0	0	0	2.20658	0	0.240628	0	0.394562	0	0	0	0.240628	0	0	0	0	0
F2S4_170324_014_F01	133	#598069	Microglia Siglech	3	#808285	Non-Neuronal	2.5922	0	0	2.28504	0	0	0	0	0	0	0	0	2.87987	0	0.216923	0.216923	3.58451	0	2.07759	0	2.14502	0	0.46888	0	0	0	0.216923	0	0	0	0	1.1448	2.23234	0.216923
F2S4_170324_014_H01	118	#665C47	Astro Aqp4	3	#808285	Non-Neuronal	0.20968	0	0	0	0	0	0	0	1.78232	0	0	0	2.853	2.11216	0	0	3.2617	0	3.06712	2.60212	2.19528	0	0.857704	0	0	0	0	0	0	0	1.50557	2.58424	1.89871	0
F2S4_170324_015_A01	118	#665C47	Astro Aqp4	3	#808285	Non-Neuronal	0	0	0	2.65259	2.17019	0	0	0	2.50477	0	2.50365	0	2.41266	0	0	0	2.76453	0	2.69585	2.43298	2.51803	0	0.966471	0	0	0	0	0	0	0	0	2.39857	0.541218	0
F2S4_170324_015_B01	118	#665C47	Astro Aqp4	3	#808285	Non-Neuronal	0	0	0	2.14797	0	0	0	0	2.83586	0	0.21809	2.44031	2.73276	1.854	2.45645	1.51803	2.67271	0	2.07101	0	0.21809	0	2.4604	0	1.05831	1.78542	0	1.559	1.6868	0	0	2.35042	0	0
F2S4_170324_015_C01	133	#598069	Microglia Siglech	3	#808285	Non-Neuronal	2.93419	0	0	2.32099	0	0	0	0	0	0	2.84861	0	2.83641	0	0.470385	0	2.69374	0	2.77354	0	0.217819	0	1.63682	0	0	0	0	0	0	0	0	0	2.27246	0.362209
F2S4_170324_015_D01	118	#665C47	Astro Aqp4	3	#808285	Non-Neuronal	0	0	0	2.02681	0	0	0	0	2.45061	0	0	0	2.80414	2.29853	0	0	2.67441	0	1.7952	2.74499	2.37707	0	0	0	0	0	0	0	0	0	0	0	0	0
F2S4_170324_015_E01	118	#665C47	Astro Aqp4	3	#808285	Non-Neuronal	0	0	0	2.16887	0	0	0	0	1.87767	0	2.68355	0	0.412306	0	2.64636	0	2.82368	0	0	2.65937	2.752	0	1.63325	0	0	0	0	0	0	0	0	0	0	2.4845
F2S4_170324_015_F01	133	#598069	Microglia Siglech	3	#808285	Non-Neuronal	2.54866	0	0	2.54607	0	0	0	0	0	0	0.230407	0	3.07119	0	2.65147	0	3.3043	0	2.72261	2.01943	0	0	2.02233	0	0	0	0	2.29127	0	0	0	0	1.94684	0
F2S4_170324_015_G01	118	#665C47	Astro Aqp4	3	#808285	Non-Neuronal	2.63498	0	0	2.45471	1.07192	0	0	0	2.53305	0	2.79545	0	2.98505	2.36344	0	0	0	0	3.21578	1.1497	2.3576	0	2.09765	0	0	0	2.444	0	0	0	0	0	0	0
F2S4_170324_015_H01	119	#476655	OPC Pdgfra Grm5	3	#808285	Non-Neuronal	2.45997	0	0	2.24002	0	2.3677	0	0	0	0	2.71847	0	2.64184	2.30532	0	0	0	0	2.83945	1.86685	2.06742	0	2.45268	0	0	1.83376	0	0	0	0	0	2.1858	0	2.53905
F2S4_170324_016_A01	122	#6C8581	Oligo Serpinb1a	3	#808285	Non-Neuronal	0	0	0	2.93422	0	0	0	0	0	0	2.91579	0	3.07264	2.249	0	1.63667	0	0	2.17111	1.63667	2.83129	0	0	0	0	0	0	1.53116	0.190216	0	1.83979	2.26355	1.9185	2.33423
F2S4_170324_016_B01	130	#997F7A	Endo Ctla2a	4	#8D1800	Endothelial	2.95577	0	0	0	0	0	0	0	0	0	3.32641	0	2.91046	0	0	0	0	0	0.281744	0	2.89305	0	0	0	0	0	0	0	0	0	0	3.15922	0	0
F2S4_170324_016_C01	122	#6C8581	Oligo Serpinb1a	3	#808285	Non-Neuronal	0.202586	0	0	2.83387	0	0	0	0	0	0	2.11187	0	2.15005	2.47274	0	0	0	1.06813	0.202586	1.92842	2.90428	0	0	0	0	0	0	0	0	0	0	0	1.79392	0
F2S4_170324_016_E01	122	#6C8581	Oligo Serpinb1a	3	#808285	Non-Neuronal	0	0	0	2.72864	0	0	0	0	0	0	2.41072	0	2.96148	2.67577	0	0	0	1.46787	2.28341	0	2.56316	2.38559	0	0	0	0	0	0	0	0	0	2.27281	2.28732	0
F2S4_170324_016_F01	118	#665C47	Astro Aqp4	3	#808285	Non-Neuronal	0	0	0	2.1515	1.50694	0	0	0	3.08394	0	2.76113	2.56135	2.57953	0	0.974587	2.08041	3.12299	0	2.77601	0	2.35172	0	2.03349	0	0	0	0	0	0	0	0	1.36271	1.87093	1.72335
F2S4_170324_016_G01	119	#476655	OPC Pdgfra Grm5	3	#808285	Non-Neuronal	2.23667	0	0	0	2.6822	0	0	0	0	0	0	0	2.82125	1.63707	1.94317	0	0	1.32574	2.56039	1.19843	2.73258	0	1.94648	0	0	0	0	0	0	0	0	1.7224	0	0
F2S4_170324_016_H01	118	#665C47	Astro Aqp4	3	#808285	Non-Neuronal	0	0	0	2.35962	0	0	0	0	0	0	2.63672	0	2.8713	0	0	0	3.03976	0	2.51714	0	2.69795	0	1.67441	0	0	0	0	0	0	0	0	0	0	2.84025
F2S4_170324_017_A01	119	#476655	OPC Pdgfra Grm5	3	#808285	Non-Neuronal	0	0	0	2.56384	0	0	0	0	0	0	3.03861	0	2.875	2.64489	0	0	0	0	0	0	2.4328	0	2.42219	0	0	0	0	0	0	0	0	0	0	0
F2S4_170324_017_C01	119	#476655	OPC Pdgfra Grm5	3	#808285	Non-Neuronal	0	0	0	0	0	0	0	0	0	0	0	0	2.8229	0	0.299767	0	0.299767	0	0	0	2.72175	0	0	0	0	0	0	0	0	0	0	0	0	0
F2S4_170324_017_D01	133	#598069	Microglia Siglech	3	#808285	Non-Neuronal	3.16213	0	0	0	0	2.16187	0	0	0	0	0	0	3.08556	0	0	0	3.46901	0	0	2.70696	0	0	2.62102	0	0	0	0	2.59636	0	0	1.84121	2.4463	2.37252	2.65
F2S4_170324_017_E01	133	#598069	Microglia Siglech	3	#808285	Non-Neuronal	3.47836	0	0	2.47817	0	0	0	0	0	0	0	0	2.8281	0	0.215689	0	0	0	0	0	0	0	0	0	0	0	0	0	0	0	0	0	2.52813	1.00021
F2S4_170324_017_F01	133	#598069	Microglia Siglech	3	#808285	Non-Neuronal	3.07215	0	0	2.76414	0	2.08919	0	0	0	0	2.90526	0	2.5908	0	0	0	2.91172	0	0	0	1.81584	0	2.64489	0	0	0	0	0	0	0	1.77134	0	2.09417	2.6116
F2S4_170324_017_G01	122	#6C8581	Oligo Serpinb1a	3	#808285	Non-Neuronal	0	0	0	2.24161	0	0	0	0	0	0	2.67778	0	3.26252	1.93962	0	0	2.45443	0	2.69514	2.49288	2.99937	0	0	0	0	0	0	0	0	0	1.6701	0	0	1.65703
F2S4_170324_017_H01	118	#665C47	Astro Aqp4	3	#808285	Non-Neuronal	0	0	0	0	0	0	0	0	2.33819	0	0.268852	0	2.45703	0	0	0	2.11539	0	0	0	2.26986	0	0	0	0	0	2.50147	0	0	2.60068	0.845111	0	0	0
F2S4_170324_024_A01	122	#6C8581	Oligo Serpinb1a	3	#808285	Non-Neuronal	2.08802	0	0	3.05069	0	0	0	0	0	0	2.87359	0	3.37086	1.8119	0	0	0	0.665924	1.64429	1.9581	3.08408	0	0	0	0	1.12899	0	0	0	0	1.61247	2.13837	2.16384	2.46724
F2S4_170324_024_C01	133	#598069	Microglia Siglech	3	#808285	Non-Neuronal	3.00926	0	0	0.283167	0	0	0	0	0	0	3.14309	0	2.87631	0	0	0	3.05132	0	0	0	2.54907	0	2.57106	0	0	0	0	2.13108	0	2.77178	0	0	0	3.25843
F2S4_170324_024_D01	132	#4C6647	PVM Mrc1	3	#808285	Non-Neuronal	3.34883	0	2.91365	2.43688	0	0	0	0	0	0	0	0	0	1.34965	0	0	3.77429	0	0	0	0	0	0	0	0	0	0	0	0	0	0	0	0	0
F2S4_170324_024_E01	118	#665C47	Astro Aqp4	3	#808285	Non-Neuronal	0.41095	0	0	2.00466	0	0	0	0	1.01937	0	2.83768	0	0	0	1.59783	0	0.252371	0	2.76061	2.20031	0.252371	0.252371	0	0	0	0	2.34256	0	0	0	0	0	0	2.38405
F2S4_170324_024_F01	130	#997F7A	Endo Ctla2a	4	#8D1800	Endothelial	3.29353	0	0	0	0	0	0	0	0	0	0	0	2.95995	0	0	2.48746	0	1.88552	0	0	0	0	0.294942	0	0	0	0	0	0	0	0	2.54528	2.14011	3.1583
F2S4_170324_024_H01	133	#598069	Microglia Siglech	3	#808285	Non-Neuronal	3.19697	0	0	0	0	0	0	0	0	0	2.77153	0	2.6869	0.261006	0	0	2.98895	0	2.68246	0	0	0	1.26251	0	0	0	0	0	0	0	2.3587	2.70913	2.21082	2.56348
F2S4_170324_025_A01	122	#6C8581	Oligo Serpinb1a	3	#808285	Non-Neuronal	2.52082	0	0	2.88789	0	0	0	0	2.04688	0	3.002	0	2.75053	2.97696	2.66691	0	0	1.17503	1.89822	1.81096	2.81399	0	0	0	0	0	0	0	0	2.76412	0	2.34253	2.09513	0.692603
F2S4_170324_025_B01	118	#665C47	Astro Aqp4	3	#808285	Non-Neuronal	2.14909	0	0	2.29457	0	0	0	0	2.48348	0	1.35987	0	2.76547	2.00844	0	2.154	2.01745	0	2.28505	0	2.57888	0	0	0	0	0	0	0	0	0	0	0	0	2.47965
F2S4_170324_025_C01	122	#6C8581	Oligo Serpinb1a	3	#808285	Non-Neuronal	2.45372	0	0	2.94979	0.703623	0	0	0	0	0	3.10202	0	3.12075	2.3896	0	2.40198	3.21425	2.1409	1.9169	2.31859	3.17709	0	0	0	0	0	0	0	0	0	0	1.28426	2.25984	0
F2S4_170324_025_D01	122	#6C8581	Oligo Serpinb1a	3	#808285	Non-Neuronal	0.179738	0	0	2.92887	0	0	0	0	0	0	2.94306	1.99975	2.98281	2.49866	0	0	0	2.12804	2.18542	2.42578	2.85562	0	0	0	0	1.69187	0	2.56953	0	0	1.05127	2.61397	1.92718	2.52069
F2S4_170324_025_E01	122	#6C8581	Oligo Serpinb1a	3	#808285	Non-Neuronal	0	0	0	2.71141	0	0	0	0	0	0	2.93784	0	3.23949	1.87792	0	0	0	0	2.45421	2.13697	2.90956	0.175117	0	0	0	0	0	0	0	2.1043	0	0	1.65515	2.33454
F2S4_170324_025_G01	133	#598069	Microglia Siglech	3	#808285	Non-Neuronal	2.92263	0	0	2.00792	0	0	0	0	0	0	2.8391	0	2.58323	0	0	0	3.41893	0	0	0	1.83805	2.29842	1.97351	0	0	0	0	0	0	0	0	0	2.36324	2.88425
F2S4_170324_026_A01	133	#598069	Microglia Siglech	3	#808285	Non-Neuronal	2.83235	0	0	2.28848	0	0	0	0	0	0	1.3226	0	2.82184	0	0	0	2.80086	0	2.74254	0	1.83609	0	0	0	0	0	0	0	0	0	0	2.92488	2.25808	0
F2S4_170324_026_B01	119	#476655	OPC Pdgfra Grm5	3	#808285	Non-Neuronal	0	0	0	2.01689	0	0	0	0	0	0	3.26749	0	2.41989	1.1871	0	0	0	0	2.58444	0	0	0	2.88189	0	0	0	0	0	0	0	0	0	0	2.7797
F2S4_170324_026_C01	133	#598069	Microglia Siglech	3	#808285	Non-Neuronal	2.69911	0	0	0	0	0	0	0	0	0	0.26357	0	2.7063	0	3.34384	0	2.884	0	0	1.96372	0	0	0	0	0	0	0	0	0	0	0	0	2.25438	2.55823
F2S4_170324_026_G01	118	#665C47	Astro Aqp4	3	#808285	Non-Neuronal	2.37284	0	0	2.56675	0	2.6976	0	0	2.33351	0	1.6136	0	2.93485	0	0	0	2.7763	0	0	0	2.41682	0	2.50734	0	0	0	2.24996	0	0	0	0	2.25378	0	2.48446
F2S4_170324_027_A01	119	#476655	OPC Pdgfra Grm5	3	#808285	Non-Neuronal	2.0648	0	0	1.51241	2.34591	0	0	0	0	0	3.00633	0.687818	2.77993	2.09091	0	2.04791	0	1.0173	2.49179	1.9156	2.06272	2.24787	2.80736	0	0	0	0	0	0	0	1.61692	0	1.86946	1.4489
F2S4_170324_027_C01	118	#665C47	Astro Aqp4	3	#808285	Non-Neuronal	0	0	0	2.2402	0	0	0	0	0.850441	0	2.95129	1.62726	2.70744	2.06002	0	2.17291	3.00177	0	2.49419	1.96233	2.03393	0	1.48024	0	0	0	1.66315	0	0	2.08896	0	0	1.27071	1.49739
F2S4_170324_027_D01	118	#665C47	Astro Aqp4	3	#808285	Non-Neuronal	1.99841	0	0	2.48219	0	0	0	0	0	0	3.02374	0	2.79742	1.65021	2.50164	0.475077	3.02753	1.27585	2.17784	1.60267	2.42884	0	0	0	0	0	0	0	0	0	0	0	0	1.34602
F2S4_170324_027_E01	122	#6C8581	Oligo Serpinb1a	3	#808285	Non-Neuronal	0	0	0	2.90402	0	2.60072	0	0	0	0	3.18431	0	2.81758	2.08657	0	0	0	1.86709	2.36472	2.80989	2.64201	0	0	0	0	0	0	0	0	0	0	0	2.31434	2.67445
F2S4_170324_027_F01	118	#665C47	Astro Aqp4	3	#808285	Non-Neuronal	0	0	0	2.44463	0	0	0	0	2.64629	0	3.14922	0	2.6709	0.393647	0	0	0	0	2.87063	2.60615	2.76184	0	1.13165	0	0	0	0	0	0	0	0	2.67633	2.13823	0
F2S4_170324_027_G01	133	#598069	Microglia Siglech	3	#808285	Non-Neuronal	3.37349	0	0	2.74781	0	0	0	0	0	0	2.96744	0	0	0	0	0	2.65487	0	0	0	0	0.388622	2.9811	0	0	0	0	0	0	0	2.18858	0	2.74781	0
F2S4_170324_027_H01	133	#598069	Microglia Siglech	3	#808285	Non-Neuronal	3.11821	0	0	0	0.223069	0	0	0	0	0	3.06862	0	2.37287	0	0	0	3.18039	1.62966	0.223069	0	2.24107	0	1.92209	0	0	0	0	0	0	0	1.53015	2.71765	1.94253	1.89324
F2S4_170324_028_A01	118	#665C47	Astro Aqp4	3	#808285	Non-Neuronal	0	0	0	2.21716	0	0	0	0	2.69417	0	3.04072	0	2.66298	2.29918	0	2.20888	2.81765	0.859203	2.55544	0	2.30458	0	1.16756	0	2.73038	0	0	0	1.251	0	0	2.3528	1.50725	2.26233
F2S4_170324_028_B01	118	#665C47	Astro Aqp4	3	#808285	Non-Neuronal	2.23234	0	0	2.38447	0	0	0	0	2.37905	0	2.81523	0	2.78884	0	0	0	0	0	2.64562	0	2.36799	0	2.27738	0	0	0	0	0	2.02668	0	0	2.01924	0	0
F2S4_170324_028_C01	133	#598069	Microglia Siglech	3	#808285	Non-Neuronal	2.97932	0	0	2.32043	0	0	0	0	0	0	2.69697	0	2.59315	0	0	0	3.3709	0	2.92568	0	0	0	0	0	0	0	0	0	1.47607	0	1.17929	0	2.15905	0
F2S4_170324_028_D01	122	#6C8581	Oligo Serpinb1a	3	#808285	Non-Neuronal	2.34297	0	0	2.79595	0	0	0	0	0	0	0	0	2.41122	2.53652	0	0	2.99697	0	1.6966	0	2.59337	0	0	0	0	0.988831	0	1.7623	0	2.8245	0	0	0	0
F2S4_170324_028_E01	133	#598069	Microglia Siglech	3	#808285	Non-Neuronal	3.41693	0	0	0	0	2.38466	0	0	0	0	0	0	2.26833	2.17477	0	0	3.30875	0	2.29152	0	0	0	0.37228	0	0	0	0	0	0	0	0.482138	3.00793	2.36477	2.80105
F2S4_170324_028_F01	119	#476655	OPC Pdgfra Grm5	3	#808285	Non-Neuronal	0	0	0	0.186816	0	0	0	0	3.20121	0	0	0	3.31481	0	1.29694	0	0	0	2.88048	0	2.72155	0	3.02438	0	0	1.21978	0	0	0	0	0	0	2.39017	0
F2S4_170324_028_G01	122	#6C8581	Oligo Serpinb1a	3	#808285	Non-Neuronal	2.15758	0	0	2.91889	0	0	0	0	0	0	2.58916	2.39107	3.1299	2.11075	0	0	1.93458	0.830758	2.40384	2.00981	2.71514	0	0	0	0	0	0	0	0	0	1.54544	2.30194	2.38735	0.559179
F2S4_170324_028_H01	133	#598069	Microglia Siglech	3	#808285	Non-Neuronal	3.3954	0	0	2.55072	0	0	0	0	0	0	2.5287	0	2.65195	0	0	0	3.43878	0	2.1201	0	0	0	0	0	0	0	0	0	0	0	0	2.65195	2.23817	2.38293
F2S4_170324_035_A01	118	#665C47	Astro Aqp4	3	#808285	Non-Neuronal	0	0	0	2.53203	0	0.694332	0	0	3.24405	0	0	0	3.03467	2.06243	0	0	0	1.66642	2.72364	2.64516	2.88462	0	2.81833	0	2.89856	0	0	0	0	0	0	0	2.19013	2.94114
F2S4_170324_035_C01	119	#476655	OPC Pdgfra Grm5	3	#808285	Non-Neuronal	0	0	0	0	2.34263	0	0	0	0	0	3.04078	0	2.93615	2.51081	0	0	0.215515	0	2.76096	1.07639	2.51679	0	2.62912	0	1.40511	0	0	0	0	0	0	0	2.35266	0
F2S4_170324_035_D01	118	#665C47	Astro Aqp4	3	#808285	Non-Neuronal	0	0	0	2.24043	0	0	0	0	2.67102	0	0.984417	2.62545	2.86995	0	0	2.61281	0	0	3.11419	0	2.41279	0	0.848391	0	0	0	0	0	0	0.270622	0	0	1.73038	2.54129
F2S4_170324_035_E01	133	#598069	Microglia Siglech	3	#808285	Non-Neuronal	2.9034	0	0	0	0	0	0	0	0	0	3.23969	0	2.60012	0.269026	0	0	3.26349	0	2.7531	0.269026	0	0	0.269026	0	0	0	0	0	0	0	0	0	1.99098	0.269026
F2S4_170324_035_F01	133	#598069	Microglia Siglech	3	#808285	Non-Neuronal	3.36534	0	0	2.62098	0	0	0	0	0	0	1.92987	0	2.83126	2.23388	0	0	3.27263	1.54494	2.01372	0	2.36864	0	0	0	0	0	0	0	0	0	0	0	2.51578	2.59297
F2S4_170324_035_G01	122	#6C8581	Oligo Serpinb1a	3	#808285	Non-Neuronal	1.87658	0	0	3.10254	0	0	0	0	0	0	0	0	3.069	2.31193	0	0	2.38975	0	2.90572	2.16975	2.62552	0	0	0	0	0	0	0	0	0	0	0	2.29975	2.8107
F2S4_170324_035_H01	118	#665C47	Astro Aqp4	3	#808285	Non-Neuronal	0	0	0	2.40454	0	0	0	0	0	0	1.56958	0	2.32393	1.05382	0	0	3.12119	1.95219	2.75936	0	1.95634	0	1.05382	0	2.90721	0	0	0	0	0.269502	0	0	0	0
F2S4_170324_036_A01	118	#665C47	Astro Aqp4	3	#808285	Non-Neuronal	0	0	0	1.96311	0	0	0	0	3.04846	0	2.70518	0	2.44976	0	0	0	0	0	2.5587	0	2.62282	0	2.30921	0	0.257971	0	0	0.257971	0	0	0	0.257971	0	2.09165
F2S4_170324_036_D01	118	#665C47	Astro Aqp4	3	#808285	Non-Neuronal	0	0	0	2.0497	0	0	1.33063	0	0	0	2.81618	0	2.48199	0	0	0	2.09154	0	2.5931	0	2.38544	0	1.86223	0	0	0	0	0	0	0	0	0	0	0
F2S4_170324_036_G01	122	#6C8581	Oligo Serpinb1a	3	#808285	Non-Neuronal	0	0	0	2.96537	0	2.67314	0	0	0	0	2.77118	0	3.18591	0.203198	0	0	2.53962	1.37422	0	2.31686	2.72394	0	0	0	0	0	0	0	0	2.43435	0	2.57756	1.09116	2.67149
F2S4_170324_036_H01	133	#598069	Microglia Siglech	3	#808285	Non-Neuronal	2.89075	0	0	2.3196	0	0	0	0	0	0	2.60538	0	2.68572	0	0	0	0	0	2.84427	0	2.2324	0	0	0	0	0	0	0	0	0	1.9339	0	2.17151	0
F2S4_170324_037_A01	122	#6C8581	Oligo Serpinb1a	3	#808285	Non-Neuronal	0	0	0	3.14047	0	0	0	0	0.205794	0	2.99762	0	3.10743	2.48645	0	0	0	1.75872	3.02803	1.83817	2.7103	0	0	0	0	0	0	0	0	0	0	2.45066	1.78541	2.65221
F2S4_170324_037_B01	122	#6C8581	Oligo Serpinb1a	3	#808285	Non-Neuronal	0	0	0	2.65595	0	0	0	0	0	0	2.60539	0	3.1872	2.31904	0	0	0	1.0654	3.00688	2.07553	2.72794	0	0	0	0	0.85439	0	0	0	0	2.16053	0	1.82599	2.49405
F2S4_170324_037_C01	118	#665C47	Astro Aqp4	3	#808285	Non-Neuronal	0	0	0	2.32221	0	0	0	0	2.93142	0	2.64343	0	2.82813	0.256943	0	0	0	0	2.59813	0	2.4437	0	0.822727	0	2.34655	0	0	0	0	0	0	1.55265	0	0
F2S4_170324_037_D01	122	#6C8581	Oligo Serpinb1a	3	#808285	Non-Neuronal	2.57223	0	0	3.07626	0	0	0	0	0	0	2.97761	1.31183	2.99204	2.58733	0	0	2.55735	1.39633	2.34725	0.211959	3.01612	0	0	0	0	1.42805	0	0	0	0	0	2.46954	2.33225	2.25449
F2S4_170324_037_E01	118	#665C47	Astro Aqp4	3	#808285	Non-Neuronal	0	0	0	2.40546	0	0.199332	2.29893	0	0	0	2.80773	0	2.47259	2.28472	1.0375	2.01743	3.12807	0.752789	2.21198	0.199332	2.50933	0	0	0	0	0	2.38301	0	0	1.89469	0	2.3954	0	2.03877
F2S4_170324_037_F01	118	#665C47	Astro Aqp4	3	#808285	Non-Neuronal	2.89216	0	0	0.195426	1.93858	0	0	0	0	0	0	0	3.17794	2.32948	0	0	0	0	0.860408	2.7899	2.95781	0.329718	1.63401	0	0	0	2.59765	0	0	0	0	1.82924	2.3958	0
F2S4_170324_037_G01	133	#598069	Microglia Siglech	3	#808285	Non-Neuronal	2.60766	0	0	0	0	0	0	0	0	0	0	0	0	0	0	0.221645	3.6309	0	0	0	0	0	0	0	0	0	0	0	0	0	0	0	0	0
F2S4_170324_037_H01	118	#665C47	Astro Aqp4	3	#808285	Non-Neuronal	1.94187	0	0	2.32809	0.499938	0	0	0	2.53929	0	2.68273	0	2.40595	1.6528	1.09794	0	2.31008	1.93101	2.61005	0	2.42282	0	2.29764	0	1.60111	1.29526	0.984406	0	0	0	0	0	0	0
F2S4_170324_038_A01	118	#665C47	Astro Aqp4	3	#808285	Non-Neuronal	0	0	0	2.06347	0	0	0	0	0	0	2.4162	0	2.36969	0.2123	0	0	2.75512	0.899528	2.72986	1.5205	2.15102	0	1.04481	0	2.2189	0	1.39718	2.14124	0	2.11473	0	2.32023	1.09158	2.11892
F2S4_170324_038_B01	121	#6B998D	Oligo Rassf10	3	#808285	Non-Neuronal	1.70943	0	0	2.06163	0	2.22362	0	0	0	0	3.17355	0	2.97142	1.99531	0	0	0	1.15175	2.98178	0.990705	2.66618	2.20362	2.05206	0	0	0	0	1.62768	0	0.459874	0	2.7275	2.12122	2.23009
F2S4_170324_038_C01	133	#598069	Microglia Siglech	3	#808285	Non-Neuronal	2.16573	0	0	0	0	0	0	0	0	0	2.46691	0	2.47736	0	0	0	3.80516	0	0.321773	0	2.09135	0	2.41144	0	0	0	0	0	0	0	0	3.07553	1.7802	0
F2S4_170324_038_E01	133	#598069	Microglia Siglech	3	#808285	Non-Neuronal	3.10926	0	0	2.0958	0	0	0	0	0	0	2.24203	0	2.58711	0	0	0	3.44933	0	2.55072	2.49203	0.994489	0	2.64915	0	0	0	0	0	0	0	2.64752	0	0.88397	0
F2S4_170324_038_F01	133	#598069	Microglia Siglech	3	#808285	Non-Neuronal	3.2497	0	0	2.03049	2.83815	0	0	0	0	0	2.49539	0	2.63361	0	0	0	3.39686	0	2.41552	0	1.83617	0	0	0	0	0	0	1.44942	0	0	1.28964	0	1.88784	2.2099
F2S4_170324_038_H01	123	#476662	Oligo Synpr	3	#808285	Non-Neuronal	1.90771	0	0	2.42292	2.15393	2.10232	0	0	0	0	2.76453	0	2.88948	2.02608	0	2.22068	0	1.78944	2.32393	0	2.50348	0	0	0	0	0	1.82306	1.60909	0	1.80844	1.68943	0	1.90474	2.00532
F2S4_170324_039_A01	118	#665C47	Astro Aqp4	3	#808285	Non-Neuronal	0	0	0	1.79359	0	0	0	0	2.71103	0	2.80007	0	2.6088	1.91002	0	0	2.90807	0	2.29222	0	2.62169	0	1.2692	0	0.802944	1.62624	2.3552	0	0	0	1.19112	1.68492	1.96735	0
F2S4_170324_039_B01	122	#6C8581	Oligo Serpinb1a	3	#808285	Non-Neuronal	0	0	0	3.01738	1.40242	1.97395	0	0	0	0	2.77798	0	3.10236	2.34868	2.17409	0	2.80619	1.34146	2.53017	2.25705	3.18684	0	0	0	0	0	2.25037	0	0	0	0	0	2.44883	2.16272
F2S4_170324_039_D01	133	#598069	Microglia Siglech	3	#808285	Non-Neuronal	3.11551	0	0	0	0	0	0	0	0	0	2.87072	0	2.37308	0	0	0	3.05698	0	2.805	0	0	0	1.88521	0	0	0	0	0	0	0	2.00873	0	2.23546	0
F2S4_170324_039_E01	122	#6C8581	Oligo Serpinb1a	3	#808285	Non-Neuronal	0.18723	0	0	2.95268	0	0	0	0	0	0	2.58518	0	3.02112	1.53676	0	0	0	1.76036	2.17694	0	2.78343	0	0	0	0	0	0	0	0	0	0	0	1.98163	2.35466
F2S4_170324_039_G01	122	#6C8581	Oligo Serpinb1a	3	#808285	Non-Neuronal	0	0	0	2.2396	0	0	0	0	0	0	2.72495	0	3.04104	2.03177	2.56039	0	0	1.93847	2.90006	2.03802	2.5869	2.20581	0	0	0	0	0	0	0	0	0	0	1.9144	0
F2S4_170324_039_H01	118	#665C47	Astro Aqp4	3	#808285	Non-Neuronal	0	0	0	2.38724	2.68362	0	0	0	1.83364	0	2.79406	0	1.82593	1.77655	0	2.22464	2.42798	0	2.95515	1.85959	2.2987	1.53133	1.94433	0	0	0	0	2.25897	0	0	0	0	1.48273	0
F2S4_170324_040_A01	118	#665C47	Astro Aqp4	3	#808285	Non-Neuronal	0.350675	0	0	2.45838	0	0	0	0	2.41289	0	2.74722	0	3.01028	1.78708	0	2.25347	3.04178	1.21821	2.43524	1.21821	2.48655	0	0	0	0	0	1.47989	0	0	0	0	0	0	0
F2S4_170324_040_C01	122	#6C8581	Oligo Serpinb1a	3	#808285	Non-Neuronal	2.02458	0	0	2.6096	0	2.10206	0	0	0	0	2.78795	0	3.05607	1.92515	0	0	0.173805	1.03513	2.78199	0	2.53905	0	0	0	0	0	1.93519	0	0	2.47025	0	2.59301	0	2.2696
F2S4_170324_040_D01	130	#997F7A	Endo Ctla2a	4	#8D1800	Endothelial	0	0	0	2.45993	0	0	0	0	0	0	0	0	3.03402	0	2.89108	0	0	0	0	0	2.66444	0	0	0	3.00883	0	0	0	0	0	0	3.00135	2.82185	0
F2S4_170324_040_E01	133	#598069	Microglia Siglech	3	#808285	Non-Neuronal	3.18538	0	0	0	0	0	0	0	0	0	0	0	2.5646	0	0	0	3.71808	0	2.82147	0	2.17651	0	2.99278	0	0	0	0	0	0	0	2.04808	0	2.50626	0
F2S4_170324_040_F01	133	#598069	Microglia Siglech	3	#808285	Non-Neuronal	3.20261	0	0	2.67514	0	0	0	0	0	0	3.53185	0	2.68284	0	2.40665	1.75107	3.61015	0	0	2.55859	1.86901	2.05825	2.81886	0	0	0	0	0.912007	0	0	0	0.217866	2.43353	1.87282
F2S4_170324_040_G01	119	#476655	OPC Pdgfra Grm5	3	#808285	Non-Neuronal	0	0	0	2.29227	2.70953	0	0	0	0	0	2.8962	0	2.64608	2.39079	2.62806	0	0	0	3.00369	2.5771	2.92619	0	2.5594	0	1.96708	0	0	1.20655	0	2.53729	0	2.83179	2.27254	0
F2S4_170324_040_H01	123	#476662	Oligo Synpr	3	#808285	Non-Neuronal	0	0	0	2.2095	2.13768	1.14114	0	0	0	0	2.9778	2.0281	2.72054	2.31376	0	1.92154	0	1.41807	2.362	0	2.29785	2.03803	0	0	0	0	2.15	0	1.95133	0	1.9724	2.43081	1.99684	2.46225
F2S4_170324_041_A01	122	#6C8581	Oligo Serpinb1a	3	#808285	Non-Neuronal	0	0	0	2.96003	0	0	0	0	0	0	3.14393	0	2.90976	1.75161	0	0	3.23126	0	2.06101	0	2.83803	0	0	0	0	1.24369	0	0	0	0	0.954075	0	1.55853	2.04252
F2S4_170324_041_C01	122	#6C8581	Oligo Serpinb1a	3	#808285	Non-Neuronal	0	0	0	2.9928	0	0	0	0	0	0	2.98251	0	2.80298	2.42963	0	0	2.93208	1.56533	2.15398	1.20909	2.7496	0	0	0	0	0.17313	0	1.98678	0	0	0	2.54678	2.16865	2.73771
F2S4_170324_041_D01	118	#665C47	Astro Aqp4	3	#808285	Non-Neuronal	1.10466	0	0	2.10395	2.56745	0	0	0	0	0	2.88371	2.72475	2.763	0	0	0	1.53429	1.6891	2.15732	0	1.59224	0	3.09579	0	0	0	0	2.60062	0	0	0	0	2.18033	0
F2S4_170324_041_E01	133	#598069	Microglia Siglech	3	#808285	Non-Neuronal	3.14076	0	0	0.228387	1.79646	0	0	0	0	0	0	0	0	0.228387	0	0	2.56798	0	0	0	0	0	1.73464	0	0	0	0	0	0	0	0	2.87368	1.82883	0
F2S4_170324_041_F01	133	#598069	Microglia Siglech	3	#808285	Non-Neuronal	2.5789	0	0	0	0	0	0	0	0	0	0	0	2.20748	0	0	0	3.28435	0	0	0	2.1835	0	0	0	0	0	0	0	0	0	0	3.16515	0	2.73255
F2S4_170324_041_G01	118	#665C47	Astro Aqp4	3	#808285	Non-Neuronal	0	0	0	2.52851	2.67018	0	0	0	1.86361	0	2.94146	1.47852	2.77278	1.84681	0	0	3.02285	1.19168	2.8329	0	2.54254	0	1.10643	0	0	0	0	1.17189	0	0	0	2.4591	0	2.28844
F2S4_170324_041_H01	122	#6C8581	Oligo Serpinb1a	3	#808285	Non-Neuronal	0.798906	0	0	2.68264	0	0	0	0	0	0	2.65073	0.936838	3.05343	2.76808	0	0	0	1.53816	2.17555	1.42943	2.64382	0	0	0	0	0	2.4097	0	0	0	0	1.83285	1.57366	2.71582
F2S4_170324_042_A01	133	#598069	Microglia Siglech	3	#808285	Non-Neuronal	3.27002	0	0	2.56976	0	2.61148	0	0	0	0	2.63471	0	2.64286	0	0	0	3.11185	0	2.49335	0	0	0	2.45257	0	0	0	0	0	0	0	0	2.46994	2.60492	2.72701
F2S4_170324_042_B01	123	#476662	Oligo Synpr	3	#808285	Non-Neuronal	2.13869	0	0	2.79808	0	0	0	0	0	0	3.04351	0	2.44745	2.06572	0	2.26867	0	0	1.94264	1.77023	2.47205	0	0	0	0	1.80527	0	0	0	0	2.14796	1.9665	0	2.06387
F2S4_170324_042_E01	122	#6C8581	Oligo Serpinb1a	3	#808285	Non-Neuronal	0	0	0	2.91248	0	0	0	0	0	0	3.14335	0	2.77276	2.21758	0	0	0.184451	1.67243	0	0.999809	2.77469	0	0	0	0	0	0	0	0	2.14991	0	0	1.08322	2.01559
F2S4_170324_042_F01	119	#476655	OPC Pdgfra Grm5	3	#808285	Non-Neuronal	0	0	0	2.26764	0	0	0	0	0	0	3.21861	0	2.86304	1.99116	1.92662	0	0	0	2.46866	0	1.88612	0	3.27741	0	0	0	0	0	0	2.06457	0.398576	0	1.22501	1.97418
F2S4_170324_042_G01	133	#598069	Microglia Siglech	3	#808285	Non-Neuronal	3.53833	0	0	2.25619	0	0	0	0	0	0	2.59376	0	2.35261	0	0	0	2.35014	0	0	2.42837	0	0	2.14219	0	0	0	2.17128	1.44571	0	0	0	2.51889	2.45844	2.33753
F2S4_170324_042_H01	118	#665C47	Astro Aqp4	3	#808285	Non-Neuronal	2.43419	0	0	2.23812	0.809667	0	0	0	2.38936	0	2.37184	0	2.61007	1.88489	0.34468	2.36848	2.9495	0	2.52942	1.47821	2.04627	0	2.17612	0	0	0	2.30034	0	0	0	0	2.36052	1.58609	2.0439
F2S4_170711_001_E01	127	#74996B	VLMC Spp1 Col15a1	3	#808285	Non-Neuronal	2.13939	0	0	2.44823	0	0	0	0	0	0	2.74941	0	2.93866	2.85481	0	0	0	0	3.12301	0	2.08076	0	1.23566	0	0	0	2.3003	0	0	2.64791	0.662867	2.46284	1.50799	0
F2S4_170711_001_F01	129	#807059	SMC Acta2	4	#8D1800	Endothelial	3.42122	0	0	2.62747	0	0	0	0	0	0	3.00104	0	3.02353	2.69472	0	0.855924	0	0	0	2.21256	2.93661	2.0439	0	0	0	0.750702	2.44793	0	0	2.41952	0	0.248485	2.21868	2.83032
F2S4_170711_001_G01	127	#74996B	VLMC Spp1 Col15a1	3	#808285	Non-Neuronal	2.40908	0	0	2.88507	1.17741	0	0	0	0	0	2.87006	0	2.68476	2.59433	0.700101	0	2.81898	1.32357	2.81052	0	2.4663	0	2.15062	0	0	0	1.82312	0	0	2.5637	0	2.76906	1.92395	2.66385
F2S4_170711_002_E01	129	#807059	SMC Acta2	4	#8D1800	Endothelial	2.69119	0	0	2.587	0	0	0	0	0	0	2.98527	0	2.60243	2.31667	0	0.620593	0	1.13664	0	0	2.81619	0	0	0	0	0	0	0	0	2.34249	0	1.46142	1.54757	2.61599
F2S4_170711_002_G01	127	#74996B	VLMC Spp1 Col15a1	3	#808285	Non-Neuronal	3.01405	0	0	2.26872	0.645389	0	0	0	0	0	3.25624	0	2.64472	2.19478	0	0	2.98737	0	2.73276	0	2.47247	0	0	0	0	0	0	2.30881	0	0.787425	0	0	0.894279	2.44403
F2S4_170714_001_F01	129	#807059	SMC Acta2	4	#8D1800	Endothelial	0	0	0	2.25107	0	0	0	0	0	0	0.338809	0	2.55804	2.20877	0	0	0	2.05862	2.7342	0.338809	2.91192	0	0.967192	0	0	0	0	0	0	0	0	0	0	2.08048
F2S4_170714_005_G01	129	#807059	SMC Acta2	4	#8D1800	Endothelial	3.26304	0	0	2.54829	0	0	0	0	0	0	3.13403	0	2.8454	1.86699	0	0	0	0	0	1.54622	2.60134	0.315536	0	0	0	0	0	0	0	2.74616	0	0	1.70921	0.315536
F2S4_170714_006_A01	129	#807059	SMC Acta2	4	#8D1800	Endothelial	1.81755	0	0	2.5654	0	0	0	0	0	0	3.32761	0	2.59451	1.8488	0	2.07421	0	1.55979	2.65413	0	2.75479	0	0	0	0	0	0	0	0	0	0.837693	0	0	0
F2S4_170714_013_G01	129	#807059	SMC Acta2	4	#8D1800	Endothelial	2.34183	0	0	2.44126	0	0	0	0	0	0	2.95205	0	2.99188	2.10569	0	0	0	0	2.49051	0	2.97071	0	0.8539	0	0	0	0	0	0	0	0	0.348045	1.84389	0.348045
F2S4_170714_017_A01	130	#997F7A	Endo Ctla2a	4	#8D1800	Endothelial	3.23995	0	0	3.01914	0	0	0	0	0	0	0	0	3.13131	0	0	0	3.26441	0	0	0	0	0	0	0	0	0	0	0	0	2.77077	0	2.91447	2.306	0
F2S4_170714_017_B01	127	#74996B	VLMC Spp1 Col15a1	3	#808285	Non-Neuronal	0	0	0	2.88371	0	0	0	0	0	0	3.01676	0	2.96921	2.38222	0.869406	1.68083	3.1151	0	2.69375	0.315374	2.60277	0	2.42169	0	0	0	2.31924	0	0	2.0408	0	2.52438	1.58377	2.10172
F2S4_171006_002_E01	130	#997F7A	Endo Ctla2a	4	#8D1800	Endothelial	3.3041	0	0	2.42022	0	0	0	0	0	0	2.53644	0	2.55823	2.0434	0	0	3.08714	0	0	0	2.7195	0	0	0	0	0	0	0	0	0	0	0.323489	2.02565	0
F2S4_171006_005_H01	130	#997F7A	Endo Ctla2a	4	#8D1800	Endothelial	3.37081	0	0	2.79322	0	2.29327	0	0	0	0	2.64707	0	2.39669	1.95811	0	0	3.50959	0	0	0	2.66131	0	0	0	0.313133	0	0	0	0	0	0	2.80271	1.55467	2.8113
F2S4_171006_008_B01	130	#997F7A	Endo Ctla2a	4	#8D1800	Endothelial	2.99004	0	0	2.57701	0	0	0	0	0	0	2.94433	0	2.896	0	0	0	3.83368	1.42979	0	0	2.82896	0	0	0	0	0	0	0	0	0.300215	0	2.99048	1.86762	0
F2S4_171006_009_E01	119	#476655	OPC Pdgfra Grm5	3	#808285	Non-Neuronal	1.91472	0	0	2.278	2.29281	0	0	0	0	0	3.29276	0	2.97614	2.19524	0.504313	0	0	0	2.84494	2.01749	2.29038	0.321582	1.73838	0	0	0	0	0	0	0	1.29331	0	1.2137	2.37445
F2S4_171006_014_D01	118	#665C47	Astro Aqp4	3	#808285	Non-Neuronal	0	0	0	2.63827	0	1.5989	0	0	3.06787	0	2.85284	0	2.74019	2.02426	0	0	3.09492	0	2.29659	0	2.58253	0	0	0	0	0	0	0	0	2.52746	0	0	0	2.48912
F2S4_171006_016_G01	118	#665C47	Astro Aqp4	3	#808285	Non-Neuronal	0	0	0	2.33448	0	0	0	0	2.43973	0	2.41662	0	2.99344	2.01753	0	0	2.96237	0	2.84565	0.990162	2.50546	0	1.99883	0	0	0	0	0	0	0	1.69257	2.49644	1.92052	0.321599
F2S4_171121_002_B01	118	#665C47	Astro Aqp4	3	#808285	Non-Neuronal	2.19905	0	0	0	0	0	0	0	2.83849	0	2.51489	0	2.67571	0	0	0	2.89499	0	2.63999	0	2.78541	0	0.601318	0	0	0	1.85333	0	0	1.34148	0	2.3645	1.5845	1.39699
F2S4_171121_002_E01	118	#665C47	Astro Aqp4	3	#808285	Non-Neuronal	0	0	0	1.92911	0	0	0	0	2.98231	0	2.57295	2.17223	2.96142	2.50257	0	0	3.05706	0	2.28724	0	2.59408	0	2.49183	0	0	0	1.99532	0	2.41854	2.30432	0	0	2.21951	0
F2S4_171121_002_H01	118	#665C47	Astro Aqp4	3	#808285	Non-Neuronal	0	0	0	0.649301	0	0	0	0	2.73848	0	2.83523	0	2.96844	0	0	0	0	0	2.95198	0	1.75093	0	0	0	1.80122	0	2.69676	2.38592	0	0	0	2.50418	1.99065	2.36698
F2S4_171121_003_A01	118	#665C47	Astro Aqp4	3	#808285	Non-Neuronal	2.30621	0	2.04601	2.02223	1.14711	0	0	0	2.62364	0	2.37862	0	2.74463	2.19036	0	0	3.07614	1.02026	2.62972	1.46883	2.22542	2.14858	1.68473	0	0	0	2.24925	0	0	1.97585	0	2.59974	1.30005	2.34508
F2S4_171121_003_B01	118	#665C47	Astro Aqp4	3	#808285	Non-Neuronal	0	0	0	2.557	0	0	0	0	1.32993	0	2.74409	0	2.5712	2.1887	0	0	2.88474	1.37609	2.94722	2.34545	2.30355	0	2.16444	0	0	0	2.25428	0	0	0	0	2.3661	0	2.39007
F2S4_171121_003_C01	118	#665C47	Astro Aqp4	3	#808285	Non-Neuronal	2.05712	0	0	2.74917	0	0	0	0	0.862188	0	2.77097	0	2.89479	0	0	0	2.63282	0	0	0	2.79084	0	0	0	1.04334	0	2.23513	0	0	2.23513	0	2.34406	2.27456	0.545602
F2S4_171121_003_D01	118	#665C47	Astro Aqp4	3	#808285	Non-Neuronal	0.305022	0	0	2.3523	2.59113	0	0	0	2.50761	0	2.56663	0	2.69278	1.49905	0	0	3.08458	1.40557	2.55937	0	2.56181	0	1.00716	0	0	0.482435	2.09424	1.15351	0	0.784784	1.12128	2.88588	1.30858	2.60232
F2S4_171121_003_F01	118	#665C47	Astro Aqp4	3	#808285	Non-Neuronal	0	0	0	2.39736	0	0	0	0	0.309727	0	2.5674	0	2.48106	0	0	1.9091	3.12033	0.488679	2.86415	0	2.5842	0	0.488679	0	0	0	2.13104	0	0	2.09263	0	2.23196	1.29509	2.17244
F2S4_171121_003_G01	118	#665C47	Astro Aqp4	3	#808285	Non-Neuronal	0	0	0	2.18193	0	0	0	0	2.26295	0	2.68946	0	2.6089	2.07519	0	0	3.21586	0	2.88472	2.34289	2.19293	0	2.47591	0	0	1.93335	2.0892	0	0	0	0	1.24464	0	2.33318
F2S4_171121_004_A01	118	#665C47	Astro Aqp4	3	#808285	Non-Neuronal	1.3817	0	0	2.16886	0	1.54558	0	0	2.02685	0	2.88917	0	3.00845	1.88235	0	0	3.03698	0	2.34397	1.69172	2.39248	2.15383	1.08061	0	0	0	2.19188	1.92061	0	1.94106	0	2.09845	1.92061	2.25922
F2S4_171121_004_C01	118	#665C47	Astro Aqp4	3	#808285	Non-Neuronal	0	0	0	2.33198	0	0	0	0	0.362385	0	2.71691	0	3.00372	2.49489	0	0	3.14964	1.70357	2.94554	0	2.6795	0	0.691121	0	1.55864	0	0	0	0	0	0	1.18578	1.90586	2.57415
F2S4_171121_004_E01	118	#665C47	Astro Aqp4	3	#808285	Non-Neuronal	0.630575	0	0	2.53305	0	0	0	0	3.12181	0	0.630575	0	2.46885	0	0.877538	0	3.01117	0	2.57659	0	2.55206	0	2.45909	0	1.70895	0	2.35759	0.630575	0	0	0	1.18117	0	2.69555
F2S4_171121_004_F01	118	#665C47	Astro Aqp4	3	#808285	Non-Neuronal	1.81428	0	0	2.3568	0	0	0	0	2.63278	0	2.28504	0	2.82558	1.72043	0	2.15767	2.81278	1.23176	2.39537	0	2.0066	0	2.64208	0	2.27151	0	2.03119	0	0	0	0	2.18247	1.20969	0
F2S4_171121_004_H01	118	#665C47	Astro Aqp4	3	#808285	Non-Neuronal	2.1885	0	0	2.22515	2.42955	2.2201	0	0	1.85643	0	2.58694	1.77257	2.78913	1.6208	0	2.15738	2.94799	0	2.65451	0	2.25191	0	1.86226	0	0	0	2.22765	2.57365	0	0	0.688621	0	0	2.01653
F2S4_171121_009_C01	118	#665C47	Astro Aqp4	3	#808285	Non-Neuronal	0	0	0	2.54183	0	0	0	0	0.338647	0	0	0	2.76846	0	0	0	2.91971	1.29875	2.64724	0	2.76583	0	1.75209	0	2.02087	0	1.34747	0	0	0	0.839149	2.70454	0	0
F2S4_171121_009_E01	118	#665C47	Astro Aqp4	3	#808285	Non-Neuronal	2.50201	0	0	2.28159	2.48291	0	0	0	0.330252	0	2.42559	0	2.77666	0	0	0	2.94133	0.825816	2.4402	1.56009	2.23234	0	1.70863	0	0	0	2.01506	0	0	0	0	2.31638	0	2.27639
F2S4_171121_011_F01	118	#665C47	Astro Aqp4	3	#808285	Non-Neuronal	2.07815	0	0	2.51779	0	0	0	0	0.880549	0	2.96148	2.7177	2.83187	2.19857	0	0	2.84517	0	2.62509	0	2.48154	0	0	0	0	0	1.2893	0	0	0	0	2.40753	0	0
F2S4_171121_011_G01	118	#665C47	Astro Aqp4	3	#808285	Non-Neuronal	2.12791	0	0	2.72999	0	0	0	0	2.67247	0	2.82821	0	2.66966	2.26889	1.11772	0	0	1.58945	2.9995	0	2.86651	0	2.72754	0	2.53556	0	0	0	0	0	0	2.48047	1.53545	0
F2S4_171121_012_G01	118	#665C47	Astro Aqp4	3	#808285	Non-Neuronal	2.13828	0	0	2.52336	0	0	0	0	2.91077	0	2.46608	0	2.49665	0	2.74134	0	2.56396	0	3.01954	0	2.72652	0	1.09252	0	2.4907	0.384137	0	0	0	2.42166	0	2.48265	1.61077	2.86608
F2S4_171121_012_H01	118	#665C47	Astro Aqp4	3	#808285	Non-Neuronal	2.60246	0	0	2.49265	1.58878	2.50308	0	0	0	0	3.1579	0	2.5456	2.26405	0	2.3786	2.78046	0	2.62249	0	2.7921	0	2.25805	0	0	0	0	0	0	0	1.17197	0	0.546503	0
F2S4_171121_013_C01	118	#665C47	Astro Aqp4	3	#808285	Non-Neuronal	0	0	0	2.74119	0	0	0	0	0	0	3.10215	0	3.14518	2.09596	0	0	2.82742	1.07036	2.66993	0	2.66868	0	0	0	0	0	0	0	0	1.61643	0	0.370116	0.957565	0.370116
F2S4_171121_013_D01	118	#665C47	Astro Aqp4	3	#808285	Non-Neuronal	0	0	0	2.72011	0	0	0	0	2.15657	0	3.18579	0	2.62893	1.90452	0	0	1.93266	0	0	0	2.40639	0	1.26635	0	0	0	0	1.06995	0	1.91882	0	0	2.32892	2.56398
F2S4_171121_015_A01	118	#665C47	Astro Aqp4	3	#808285	Non-Neuronal	0.339561	0	0	2.76042	2.65581	0	0	0	1.91805	0	3.03858	0	2.83798	1.93631	0	0	2.71919	0	2.78391	0	2.88203	0	2.23781	0	0	0	0	2.30397	0	0	2.10672	0	1.54877	0
F2S4_171121_015_B01	118	#665C47	Astro Aqp4	3	#808285	Non-Neuronal	2.1317	0	0	2.45925	0	0	0	0	1.59241	0	0	0	2.71821	2.20819	0	0	2.94189	1.47845	2.62566	0	2.79656	0	0	0	2.63786	0	1.49269	0	0	2.42298	0	2.73857	2.22148	0
F2S4_171121_015_C01	118	#665C47	Astro Aqp4	3	#808285	Non-Neuronal	0	0	0	2.16675	2.6515	0	0	0	1.8027	0	2.40591	0	2.53666	0	1.22862	0	3.03802	0	2.71746	0.347383	2.58491	0	1.96799	0	0	0	2.23689	0	0	0	2.09605	2.46081	0	1.57701
F2S4_171121_015_G01	118	#665C47	Astro Aqp4	3	#808285	Non-Neuronal	2.22825	0	0	2.23397	1.44565	0	0	0	0	0	3.10721	0.32653	2.6281	1.87496	0	2.11364	2.91758	1.46275	2.40349	2.06197	2.80766	0	1.88775	0	0	0	2.33938	0	0	1.86178	1.47921	2.51777	1.27727	1.52514
F2S4_171121_016_A01	118	#665C47	Astro Aqp4	3	#808285	Non-Neuronal	2.67624	0	0	2.48474	0	0	0	0	0	0	2.78756	0	2.81654	0	0	0	2.60891	1.3678	2.62735	1.14378	2.73546	0	0.655603	0	0.905779	0	1.93838	0	0	0	2.05612	2.35972	1.32168	0
F2S4_171121_016_B01	118	#665C47	Astro Aqp4	3	#808285	Non-Neuronal	1.81296	0	0	2.57485	2.6392	0	0	0	0	0	2.90078	0	2.67735	0	1.9559	0	2.79314	1.84721	2.73325	1.78538	2.76622	0	0	0	0	0	2.47862	0	0	2.4189	0	0	0	2.49559
F2S4_171121_018_C01	118	#665C47	Astro Aqp4	3	#808285	Non-Neuronal	0	0	0	2.8927	0	0	0	0	2.79299	0	2.93792	0	3.04348	2.23971	0	0	0	0	2.6645	1.20157	2.67375	0	1.96812	0	0	0	2.33425	0	0	0	0	2.79472	2.34899	2.75201
F2S4_171121_020_D01	118	#665C47	Astro Aqp4	3	#808285	Non-Neuronal	2.41753	0	0	2.64729	1.31808	1.68965	0	0	2.48621	0	2.56565	0	2.84913	2.58017	0	2.09696	3.06751	0	2.94063	0	2.79893	0	0.918814	0	1.27222	1.1628	2.18216	1.37889	0	0	0	2.52975	1.64076	0.310085
F2S4_171121_021_C01	118	#665C47	Astro Aqp4	3	#808285	Non-Neuronal	0	0	0	0	1.21735	0	0	0	1.86516	0	2.84722	0	3.26718	0	0	0	2.72249	1.88019	2.82598	0	3.01125	0	2.10565	0	1.42853	0	0	0	0	0	1.84958	0	0	1.38457
F2S4_171121_021_E01	118	#665C47	Astro Aqp4	3	#808285	Non-Neuronal	2.04608	0	0	2.00659	0	0	0	0	2.81842	0	0	0	2.94953	2.37448	0	0	3.20406	1.50422	2.72327	0	2.77274	0	0	0	2.61977	0	0	1.38379	0	0	0	0	2.2618	2.76271
F2S4_171204_001_A01	129	#807059	SMC Acta2	4	#8D1800	Endothelial	3.0445	0	0	2.70612	0.249367	0	0	0	0	0	2.37011	2.66222	2.9467	1.85484	0	0	0	1.88659	1.74271	0.613076	2.87882	0	2.13096	0	0	0	0	0	0	2.38977	0	2.41898	1.71113	2.7502
F2S4_171204_001_B01	129	#807059	SMC Acta2	4	#8D1800	Endothelial	2.85369	0	0	2.38005	0	0	0	0	0	0	3.02776	0	3.01632	1.93263	0	0	2.47579	1.59324	2.39077	0	2.91041	0	2.39602	0	0	0	0	0	0	0	1.08757	2.54686	2.37869	3.02068
F2S4_171204_001_D01	129	#807059	SMC Acta2	4	#8D1800	Endothelial	3.03144	0	0	2.65417	0	0	0	0	0	0	2.91177	0	3.06073	2.40732	0	0	0	0	0	0.277113	2.74812	0	0	0	0	0	0	2.46281	0	0	0	2.13296	2.25852	2.59236
F2S4_171204_001_E01	129	#807059	SMC Acta2	4	#8D1800	Endothelial	2.63734	0	0	2.41315	0	0	0	0	0	0	2.82088	0	2.63176	2.06622	0	0	0	0	1.87498	2.30581	2.71159	0	0	0	0	0	2.21897	0	1.32329	2.26537	0.228259	0	1.67511	2.64078
F2S4_171204_002_B01	129	#807059	SMC Acta2	4	#8D1800	Endothelial	3.35396	0	0	2.4045	0	0	1.58894	0	0	0	3.03981	0	3.12273	2.56407	0	0	0	0	2.28392	2.11145	2.85382	0	0	0	0	0	0	0	0	0	0	2.06965	2.29874	2.41947
F2S4_171204_002_C01	129	#807059	SMC Acta2	4	#8D1800	Endothelial	3.31262	0	0	2.45058	0	0	0	0	0	0	2.86828	0	2.58039	2.33821	0	2.58775	0	1.61787	2.26628	2.07758	2.23999	0	1.87772	0	0	0	0	0	0	2.23818	0	2.328	1.79046	2.03916
F2S4_171204_002_D01	118	#665C47	Astro Aqp4	3	#808285	Non-Neuronal	0	0	0	1.99311	0	0	0	0	2.70569	0	2.29811	2.16773	2.77719	1.75745	0	0	3.24789	0	2.35915	0	2.7222	0	1.66243	0	0	0	0	0	0	2.1997	0	0	0.287081	0
F2S4_171204_002_F01	129	#807059	SMC Acta2	4	#8D1800	Endothelial	3.05176	0	0	2.30278	1.79534	0	0	0	0	0	2.88851	2.19219	2.78006	2.21823	0	0	0	0	2.08502	0	2.78903	0	0.597704	0	0	0	0	0	0	2.43668	0	2.1963	2.00071	2.81783
F2S4_171204_002_H01	118	#665C47	Astro Aqp4	3	#808285	Non-Neuronal	0	0	0	1.91381	0	0	0	0	2.39428	0	3.02524	1.80248	2.82574	2.02293	0	0	2.83761	0	2.96668	0	2.55997	0	0	0	2.65688	0	2.38564	0	0	2.39938	0	0	0.470085	2.50795
F2S4_171204_003_C01	118	#665C47	Astro Aqp4	3	#808285	Non-Neuronal	0	0	0	1.9911	2.02297	1.68343	0	0	2.75994	0	3.26797	0	2.63713	0	2.69312	0	0	0	2.7466	0	2.83079	0	1.26494	0	0	0	0	0	1.58316	2.35176	0	0	2.3321	0
F2S4_171204_003_D01	118	#665C47	Astro Aqp4	3	#808285	Non-Neuronal	0	0	0	1.87379	0	0	0	0	2.13854	0	2.52349	0	2.64708	0	0	0	2.00633	0	2.51106	0	2.31192	0	0	0	0	0	0	1.46623	0	0	0	2.05701	2.16263	0
F2S4_171204_003_E01	118	#665C47	Astro Aqp4	3	#808285	Non-Neuronal	2.53111	0	0	2.60616	0	0	0	0	2.25409	0	0.402385	2.77304	2.54644	2.50705	0	0	2.98533	1.47696	2.39207	1.37814	2.48376	0	0.93594	0	2.51522	1.43035	1.06744	1.47696	0	0	1.64068	2.46372	0	1.40503
F2S4_171204_004_E01	118	#665C47	Astro Aqp4	3	#808285	Non-Neuronal	0	0	0	1.74361	0	0	0	0	2.10709	0	0	0	2.62135	2.01612	0	0	2.99542	1.666	2.34572	0	0	0	2.51519	0	0	2.25371	1.71925	1.96232	0	0	0	0	0	0
F2S4_171204_004_F01	118	#665C47	Astro Aqp4	3	#808285	Non-Neuronal	0	0	0	2.70322	0	0	0	0	2.4096	0	2.86671	0	2.94352	2.10043	0	0	2.54537	1.6169	2.67942	2.6135	2.52341	0	0	0	0	0	2.46165	2.30326	0	0	0	2.48414	0	2.77052
F2S4_171204_004_G01	121	#6B998D	Oligo Rassf10	3	#808285	Non-Neuronal	1.94776	0	0	2.54613	1.54874	0	0	0	0	0	3.25337	2.275	3.22541	1.74824	0	0	0	1.25982	2.53538	2.29438	2.51761	0.789356	0	0	0	0	0	1.9561	0	0	1.42788	2.60184	1.7347	2.43551
F2S4_171204_005_E01	123	#476662	Oligo Synpr	3	#808285	Non-Neuronal	2.03092	0	0	2.41751	0	1.31258	0	0	0	0	3.06782	2.15264	2.8584	1.39587	0	0	0	0.986057	2.44543	1.26406	2.37987	1.84802	0	0	0	0.727706	0	1.62582	1.52589	1.31258	0	2.32549	1.8059	2.32101
F2S4_171204_005_F01	118	#665C47	Astro Aqp4	3	#808285	Non-Neuronal	0	0	0	2.26615	0	0	0	0	0	0	2.41082	2.64453	2.61826	0	0	0	2.6537	0	2.53434	0	1.80984	0	1.90857	0	0	0	2.24921	2.18075	1.24239	0	0	0	1.74138	0
F2S4_171204_005_G01	118	#665C47	Astro Aqp4	3	#808285	Non-Neuronal	0	0	0	2.16888	0	0	0	0	2.79096	0	2.41604	0	2.55115	2.0373	0	0	2.83881	1.50308	2.19814	0	2.66626	0	1.33376	0	0	0	2.56046	0	0	0	0	0	0	2.14556
F2S4_171204_005_H01	123	#476662	Oligo Synpr	3	#808285	Non-Neuronal	2.14989	0	1.46306	2.64812	1.43766	0	0	0	0	0	3.22497	1.78094	3.05092	2.03433	0	0	1.50978	1.24295	2.46929	1.97786	2.55903	0.423187	0	0	0	0	0	1.41069	0	1.68877	0	2.48832	1.80405	2.12911
F2S4_171204_006_A01	118	#665C47	Astro Aqp4	3	#808285	Non-Neuronal	0	0	0	2.3567	0	0	0	0	2.37592	0	0	0	2.64393	0	0	0	2.51689	0	2.38654	0	0	0	2.86856	0	1.19585	0	0	0	0	0	0	0	2.40451	0
F2S4_171204_006_B01	129	#807059	SMC Acta2	4	#8D1800	Endothelial	3.32089	0	0	2.727	0	2.66498	0	0	0	0	2.71123	0	2.95345	2.69153	0	0	0	0	2.40783	2.44296	2.82375	0	0	0	0	0	0	0	0	2.42264	0	3.0842	2.07969	2.95467
F2S4_180122_001_H01	125	#89997A	VLMC Osr1 Mc5r	3	#808285	Non-Neuronal	2.97764	0	0	2.73233	0	0	0	0	0	0	1.87631	0	2.36051	2.01603	0	0	3.33881	0	2.49672	2.83853	2.39379	2.05267	2.38774	0	0	0	0	0	0	0.516344	0	2.3451	1.91416	0
F2S4_180122_002_B01	125	#89997A	VLMC Osr1 Mc5r	3	#808285	Non-Neuronal	2.72588	0	0	2.71982	0	0	0	0	0	0	2.97794	0	3.05984	2.55913	0	0	3.37745	0	3.31549	1.76457	2.27232	0	2.40411	0	0	0	2.75779	0	0	0	0	2.64324	1.86274	1.00937
F2S4_180122_004_B01	125	#89997A	VLMC Osr1 Mc5r	3	#808285	Non-Neuronal	3.07347	0	0	2.96433	1.77193	0	0	0	0	0	2.78242	0	2.20999	2.30307	0	0	2.74423	0	2.51241	0	2.68257	0	1.12193	0	0	0	2.47697	0	0	0	0	2.42526	1.90063	0
F2S4_180122_004_D01	125	#89997A	VLMC Osr1 Mc5r	3	#808285	Non-Neuronal	3.03421	0	0	2.87562	1.01816	0	0	0	0	0	3.07165	0	2.80328	2.40026	0	0	2.25046	0	2.79168	2.26305	2.98952	0.311211	0.311211	0	0	0	0	0	0	2.56165	0	2.49282	1.7187	2.85706
F2S4_180122_004_G01	125	#89997A	VLMC Osr1 Mc5r	3	#808285	Non-Neuronal	2.54328	0	0	2.71637	0	0	0	0	0	0	2.94356	0	2.74402	2.38112	0	0	2.09835	0	2.12448	2.58561	2.71377	0	2.66984	0	0	0	0	0	0	0	0	0	0	2.79454
F1S4_160108_009_D01	130	#997F7A	Endo Ctla2a	4	#8D1800	Endothelial	2.82055	0	0	1.81533	0	0	0	0	0	0	2.50456	0	2.54983	2.16429	0	0	3.07534	0	0	2.41456	2.27018	2.31616	0.217518	0	0.46988	0	0	0	0	0	0	2.7271	1.89771	2.553
F1S4_160108_014_B01	128	#665547	Peri Kcnj8	4	#8D1800	Endothelial	3.06798	0	0	2.43333	0	0	0	0	0	0	2.77847	0	2.85021	2.53276	0	0	2.51629	1.7781	0	0.213341	2.65086	0	2.33069	0	0	0	2.16888	0	0	0	0	2.49391	1.61907	2.6229
F1S4_180108_303_B01	131	#805F59	Endo Cytl1	4	#8D1800	Endothelial	3.45678	0	0	2.62327	0	0	0	0	0.613188	0	2.43797	0	0	2.9809	0	0	2.54236	0	0	3.19974	0.613188	0	0	0	0	0	0	0	0	0	0	0	0	0
F2S4_151217_010_C01	121	#6B998D	Oligo Rassf10	3	#808285	Non-Neuronal	0	0	0	0	0	0	2.24568	0	1.23139	0	2.79595	0	2.97765	2.30706	1.11486	0	0	0	2.99208	0	2.42205	0	2.51466	0	0	0	0	0	1.32317	0	0	2.79128	1.77671	2.54216
F2S4_151217_012_F01	122	#6C8581	Oligo Serpinb1a	3	#808285	Non-Neuronal	0	0	0	3.10437	0	1.63931	2.37145	0	0	0	2.53359	0	3.10582	2.56592	0	0	0	1.79462	2.52485	2.04144	2.74396	0.644104	0	0	0	0	0	0.89283	0	0	1.48866	2.67703	2.06753	2.47825
F2S4_151217_014_E01	123	#476662	Oligo Synpr	3	#808285	Non-Neuronal	1.75793	0	0	2.55841	0	0	0	0	0	0	2.80671	0	3.03811	2.35869	0	0	0	1.5885	2.46364	2.05809	2.18863	2.17093	0	0	0	0	2.07249	0	0	2.29739	0	2.67392	1.12494	2.40323
F2S4_151223_013_F01	123	#476662	Oligo Synpr	3	#808285	Non-Neuronal	2.13904	0	0	2.72274	0	0	0	0	0	0	2.92655	0.214564	2.91219	2.08093	2.01111	0	3.28122	0.937886	2.43647	2.33253	2.576	0	0	0	0	1.60868	0	1.84115	0	1.11859	0	1.88307	1.42419	2.25504
F2S4_160115_008_A01	118	#665C47	Astro Aqp4	3	#808285	Non-Neuronal	0	0	0	0	0	0	0	0	2.95287	0	2.83375	0	2.65884	1.86537	0	0	2.8326	0	2.8262	0	2.56174	0	2.47497	0	0	0	0	0	0	0	0	2.49048	0	1.47622
F2S4_160115_008_B01	118	#665C47	Astro Aqp4	3	#808285	Non-Neuronal	2.20878	0	0	2.43559	0	0	0	0	1.54205	0	2.66512	0	2.9336	0	1.29663	1.31678	3.24472	0	2.90863	0	2.27209	0	2.2138	0	1.78643	0	0	0	0	0.582038	0	2.88958	0	0
F2S4_160115_009_C01	118	#665C47	Astro Aqp4	3	#808285	Non-Neuronal	0	0	0	2.08991	0	0	0	0	2.72989	0	2.82532	0	2.5027	0	0	2.522	0	0	2.53707	0	1.93424	0	2.56998	0	2.64632	2.02461	0	0	0	2.54386	0	2.57627	0	0
F2S4_160115_012_B01	118	#665C47	Astro Aqp4	3	#808285	Non-Neuronal	0	0	0	2.41495	0	0	0	0	3.25768	0	2.69518	0	3.13292	0	2.48657	0	2.23535	0	2.76136	2.86795	1.91688	0	2.53182	0	1.10224	0	0	1.70076	0	2.61572	1.62775	0	2.28768	2.14876
F2S4_160115_012_G01	118	#665C47	Astro Aqp4	3	#808285	Non-Neuronal	0	0	0	2.48386	0	0	0	0	2.4969	0	2.43929	0	2.55904	2.05452	0	0	3.3741	0	2.78682	0	2.16949	0	2.68479	0	0.673472	0	0	2.31634	1.47408	0	0	0	0	0.28527
F2S4_160115_013_A01	118	#665C47	Astro Aqp4	3	#808285	Non-Neuronal	0	0	0	2.06882	0	0	0	0	1.32719	0	3.13629	1.57936	2.87554	0	2.6623	0	3.14841	0	2.56584	0	2.47872	0	2.78659	0	0	0	1.36176	0	0	0	0	1.60856	2.07529	0
F2S4_160115_013_B01	118	#665C47	Astro Aqp4	3	#808285	Non-Neuronal	2.38527	0	0	1.95489	1.75952	0	0	0	3.20415	0	0	0	2.79889	0	0	0	2.31888	0	2.47609	0	2.80674	0	2.661	0	0	2.17906	0	2.18159	0	2.47609	0	1.62817	0	0
F2S4_160115_013_G01	118	#665C47	Astro Aqp4	3	#808285	Non-Neuronal	2.28338	0	0	2.3813	0	0	0	0	3.0038	0	1.21431	0	2.23502	1.99893	0	0	2.92741	1.47915	1.80712	1.59156	2.43742	0	2.72327	0	0	0	1.67339	1.59156	0	0	0	1.90487	0.257551	2.10198
F2S4_160115_014_C01	118	#665C47	Astro Aqp4	3	#808285	Non-Neuronal	0	0	0	0.291709	0	0	0	0	2.50235	0	2.01876	2.5767	2.43301	1.28315	0.291709	0	2.49443	0	1.83268	1.65366	2.52775	0	1.81395	0	1.2375	0	2.26905	2.38263	0	0.828995	0	2.09189	1.70579	2.1881
F2S4_160115_014_G01	118	#665C47	Astro Aqp4	3	#808285	Non-Neuronal	0	0	0	2.30743	1.76435	0	0	0	3.34307	0	2.61066	0	3.02061	0	2.1225	0	3.07419	1.47072	2.54515	0	2.34504	2.67606	3.00469	0	0	0	0	0	0	0	1.45547	0	0	0
F2S4_160115_024_C01	118	#665C47	Astro Aqp4	3	#808285	Non-Neuronal	0	0	0	1.92357	0	2.06046	0	0	2.03006	0	3.03427	0	3.07016	1.8739	2.41488	1.64074	2.58019	0	2.7914	0	2.25134	0	1.10218	0	0	0	0	0	0	2.39041	1.18304	0.360732	1.48825	2.10681
F2S4_160115_024_D01	118	#665C47	Astro Aqp4	3	#808285	Non-Neuronal	0.558646	0	0	0	0	0	0	0	2.83715	0	2.44915	0	2.74019	0	0	0	1.25591	0	2.84453	2.57773	2.36211	2.59685	2.44098	0	1.93517	0	0	0	0	0	1.3905	1.64563	2.0751	1.63258
F2S4_160115_025_C01	118	#665C47	Astro Aqp4	3	#808285	Non-Neuronal	0	0	0	2.16654	0	0	0	0	1.89931	0	2.25636	0	2.82599	2.1434	0	0	2.49724	0	3.00538	2.04044	1.6889	0	0	0	1.57953	0	1.89331	0	1.97558	0	0	2.3807	1.86846	1.69846
F2S4_160115_026_F01	118	#665C47	Astro Aqp4	3	#808285	Non-Neuronal	0.350508	0	0	2.27231	0.674312	0	0	0	2.25167	0	2.40311	0	2.77676	1.86331	0	0	3.02423	0.857737	2.74206	0	2.32639	0	2.55299	0	0	0	0	0.857737	0	0.350508	0	0.350508	1.16598	0.350508
F2S4_160119_002_A01	133	#598069	Microglia Siglech	3	#808285	Non-Neuronal	3.26937	0	0	1.78653	0	0	0	0	0	0	3.10614	0	2.03755	0	0	0	3.3609	0	1.43108	2.03755	2.06906	0	1.79613	0	0	0	0.810899	1.077	0.810899	0	0	1.33268	2.23536	2.82676
F2S4_160119_009_A01	118	#665C47	Astro Aqp4	3	#808285	Non-Neuronal	0	0	0	2.42757	0	0	0	0	1.85912	0	3.20591	0	2.51715	0	0	0	3.2772	0	2.54978	0	2.36815	0	1.64126	0	1.54682	0	2.86481	0	0	0	1.37685	2.31156	2.40865	0
F2S4_160119_009_D01	118	#665C47	Astro Aqp4	3	#808285	Non-Neuronal	0.818815	0	0	2.36725	0	0	0	0	2.19338	0	1.36839	0	1.81473	2.05223	0	0	3.13281	0	2.66734	2.35402	2.69515	0	2.22703	0	1.71012	0	2.03015	0	0	0.579151	2.42793	0	1.66003	2.64594
F2S4_160121_005_F01	118	#665C47	Astro Aqp4	3	#808285	Non-Neuronal	0.289819	0	0	2.06026	0	0	0	0	2.4167	0	2.60776	0	2.85812	1.74853	0	0	2.74744	0	2.84537	0.289819	1.74853	0	1.74111	0	2.05666	1.15492	0	0	0	0.462108	0	0.289819	1.52201	2.23026
F2S4_160121_007_H01	118	#665C47	Astro Aqp4	3	#808285	Non-Neuronal	0	0	0	2.06642	0	0	0	0	2.81798	0	2.14445	0	2.6552	1.65487	1.234	1.65487	2.93009	0	2.59395	1.99798	2.24966	2.23056	1.92115	0	2.45571	0	2.08197	0	0	0	0	1.55422	1.16409	1.234
F2S4_160121_008_G01	118	#665C47	Astro Aqp4	3	#808285	Non-Neuronal	0	0	0	2.1704	2.75333	0	0	0	2.57508	0	2.4834	0	2.45002	0	0	0	3.27557	0.799275	2.34422	1.43926	2.12107	0	0.951754	0	2.91645	2.06043	2.28873	0	0	2.47385	2.34939	0	0	0
F2S4_160121_009_H01	118	#665C47	Astro Aqp4	3	#808285	Non-Neuronal	0.32453	0	0	0	0	1.40563	0	0	3.00143	0	2.33783	0	0.735982	1.89644	0	0	2.90727	1.65752	2.59712	2.09462	2.33112	0	2.84299	0	0	0.995179	2.59834	0	0	0	0	0	0	2.4606
F2S4_160121_011_B01	118	#665C47	Astro Aqp4	3	#808285	Non-Neuronal	2.19466	0	0	1.91864	0	0	0	0	2.74508	0	0	0	2.69484	0	1.14257	0	2.40972	0	1.73547	2.41744	2.28638	0	1.90889	0	2.24748	0	1.26689	2.53463	0	0	2.45547	2.22901	0	0
F2S4_160121_014_H01	118	#665C47	Astro Aqp4	3	#808285	Non-Neuronal	0	0	0	2.44937	2.71664	0	0	0	2.7788	0	2.33382	0	2.68741	0	0	0	2.89131	1.4426	1.81082	0	1.75964	0	0	0	1.69266	0	2.26927	0	0	0	0	1.80387	0	1.9358
F2S4_160121_015_H01	118	#665C47	Astro Aqp4	3	#808285	Non-Neuronal	1.18087	0	0	2.19542	0	0	0	0	2.98648	0	2.63042	0	2.36682	0	0	2.11567	2.97125	1.18087	2.05815	0	2.03037	0	2.61576	0	0.782419	0	0	1.9593	1.08387	2.0007	0	2.72194	1.40285	0
F2S4_160121_016_E01	118	#665C47	Astro Aqp4	3	#808285	Non-Neuronal	1.65332	0	0	2.39073	0	0	0	0	2.8843	0	2.43251	0	2.6194	0	0	2.00134	2.83274	0.822333	2.62408	0	1.70462	0	0.64202	0	0.890478	0	2.11277	2.26171	0.822333	0	1.08938	2.24809	2.08142	1.60743
F2S4_160121_017_A01	118	#665C47	Astro Aqp4	3	#808285	Non-Neuronal	1.70754	0	0	2.09772	0	0	0	0	2.13784	0	2.78858	0	2.66708	0	0	0	1.67402	0.244899	2.60064	0	2.18757	0	2.06781	0	2.52709	0	0	0	0	2.73207	0	2.25472	1.89776	2.31765
F2S4_160126_009_D01	123	#476662	Oligo Synpr	3	#808285	Non-Neuronal	1.88035	0	1.47224	2.79232	0	2.03016	0	0	0	0	2.96266	1.81187	3.07695	2.1554	0	0	0	1.49995	2.56865	1.93294	2.72587	1.71446	0	0	0	1.49995	0	1.16675	0	0	0	1.81621	1.44264	2.07524
F2S4_160129_015_B01	123	#476662	Oligo Synpr	3	#808285	Non-Neuronal	1.68396	0	0	2.48374	1.98544	0	0	0	0	0	2.87385	1.4713	3.04954	1.9494	0	1.41997	0	1.78889	2.45623	1.38203	2.53404	0.322225	0	0	0	1.24305	0	1.1523	0	0	0	2.08244	1.86689	2.09413
F2S4_160304_002_D01	118	#665C47	Astro Aqp4	3	#808285	Non-Neuronal	2.31388	0	0	2.33167	0	0	0	0	2.29533	0	3.02621	0	2.61325	2.54567	2.09101	1.895	3.06718	0	0	0	2.61325	1.91969	2.0703	0	2.19802	0	1.74471	2.0703	0	2.28897	0	1.94589	2.15134	2.2074
F2S4_160304_005_E01	118	#665C47	Astro Aqp4	3	#808285	Non-Neuronal	2.14525	0	0	2.58765	0	0	0	0	3.00913	0	2.99166	0	2.93344	0.326067	0	0	2.60849	0	1.98267	0	2.15894	0	2.82751	0	2.20976	0	0	0	0	0	0	2.36655	1.46191	2.24982
F2S4_160304_006_B01	118	#665C47	Astro Aqp4	3	#808285	Non-Neuronal	0.314214	0	0	0	0	0	0	0	0	0	1.7415	0	2.77335	0	0	0	2.29536	0	2.88986	0	1.32575	0	2.37026	0	2.96297	0	0	2.08266	1.51653	0	0	2.65939	2.37222	2.5561
F2S4_160304_007_B01	118	#665C47	Astro Aqp4	3	#808285	Non-Neuronal	1.92879	0	0	1.67289	0	0	0	0	2.27441	0	2.29721	0	2.18493	2.10159	0	0	2.77219	0	2.46577	1.00933	2.27013	0	1.4709	0	0.968271	0	0	0	0	0	0	2.22487	2.07547	1.17102
F2S4_160304_007_H01	118	#665C47	Astro Aqp4	3	#808285	Non-Neuronal	0	0	0	0	1.68924	0	0	0	2.70724	0	0.291778	1.15866	3.0111	0	0	0	2.4769	0	2.87784	0	2.52293	0	2.11177	0	1.86236	0	0	0	0	0	0	0	2.07836	2.7949
F2S4_160304_011_E01	118	#665C47	Astro Aqp4	3	#808285	Non-Neuronal	0	0	0	0	0	0	0	0	2.37379	0	0	0	3.04882	0	2.42253	0	0	0	2.01994	0.318101	0	0	0	0	1.20743	0	0	0.318101	0	0	0	1.84591	2.16998	0
F2S4_160304_018_B01	118	#665C47	Astro Aqp4	3	#808285	Non-Neuronal	0	0	0	2.44151	0	0	0	0	3.18285	0	0	0	0.264113	0	0	0	0	0	0	0	0	0	3.07447	0	2.95904	0	0	0	0	0	0	0	0	1.80466
F2S4_160304_020_A01	118	#665C47	Astro Aqp4	3	#808285	Non-Neuronal	0	0	0	0	0	0	0	0	2.89365	0	2.13651	0	2.15789	0.404142	2.3188	2.18268	2.53789	0	2.2941	0	1.7445	0	2.92568	0	2.20404	0	0	0.975329	0	0	0	0	0	0.519032
F2S4_160329_015_G01	121	#6B998D	Oligo Rassf10	3	#808285	Non-Neuronal	1.73256	0	0	2.40574	0	0	0	0	0	0	3.34995	2.11453	3.04818	1.39968	1.26369	0	0	1.46174	2.73462	2.10147	2.34776	1.06461	0	0	0	0	0	2.14255	0	0	0	2.17452	1.88191	2.30222
F2S4_160404_007_C01	118	#665C47	Astro Aqp4	3	#808285	Non-Neuronal	1.59121	0	0	2.05848	0	0	0	0	2.67174	0	2.95314	0	1.30788	2.20555	0	0	3.14555	0	1.10857	0	2.42156	0	1.65556	0	0	0	2.19876	0	0	2.4416	0	0	1.83837	2.85515
F2S4_160404_010_A01	118	#665C47	Astro Aqp4	3	#808285	Non-Neuronal	0	0	0	2.24313	0	0	0	0	3.23733	0	2.798	2.73912	2.64893	0	2.58479	0	3.13322	0	2.7478	0	0.312763	0	0	0	0	0	0	0	0	0	1.52075	2.70117	0	2.98194
F2S4_160404_011_G01	118	#665C47	Astro Aqp4	3	#808285	Non-Neuronal	2.27057	0	0	2.20167	0	0	0	0	3.04378	0	2.93417	0	2.64482	0	0	0.503552	2.97403	0	2.28189	0.964068	2.341	0	0.189508	0	0	1.91363	0	0	0	0	1.18252	0.572327	0	2.75332
F2S4_160404_012_E01	118	#665C47	Astro Aqp4	3	#808285	Non-Neuronal	0	0	0	0	0	0	0	0	3.09263	0	0	0.590655	2.67095	1.77561	0	0	2.35308	0	2.47297	1.20967	1.89474	0	0.91597	0	0	0	0	0	0	0	0	2.52946	0	2.18072
F2S4_160404_023_A01	118	#665C47	Astro Aqp4	3	#808285	Non-Neuronal	0.202729	0	0	2.34108	0	0	0	0	2.57562	0	2.83387	0.803044	2.07694	1.81059	0	0	2.95988	0	2.16657	0	2.64873	0	0.803044	0	0	0	2.15225	0	0	0	0	0	2.1486	1.85246
F2S4_160404_027_B01	118	#665C47	Astro Aqp4	3	#808285	Non-Neuronal	0	0	0	2.22341	2.75758	0	0	0	3.00357	0	2.46147	0	2.33634	1.85352	0	0	3.34128	0	2.29279	0	2.29584	0.227862	0	0	0	0	2.32656	2.32656	0	0	2.17011	1.9985	1.79037	1.93726
F2S4_160404_030_B01	123	#476662	Oligo Synpr	3	#808285	Non-Neuronal	1.59177	0	0.188579	2.77237	2.18076	0	0	0	0	0	2.80833	2.06141	2.92232	2.21229	0	2.00687	0	1.19539	2.17763	1.9603	2.35641	1.45006	0	0	0	0	0	0	0	0	1.11269	2.24034	0.188579	1.78786
F2S4_160404_037_B01	132	#4C6647	PVM Mrc1	3	#808285	Non-Neuronal	0.971222	0	2.81332	2.1178	0	0	0	0	0	0	0	0	2.46946	0	0	0	3.04311	0	0	0	2.11383	0	0	0	0	0	0	0	0	0.341261	0	0	2.46236	1.75682
F2S4_160404_037_F01	132	#4C6647	PVM Mrc1	3	#808285	Non-Neuronal	3.07478	0	0	0.201373	0	0	0	0	0	0	3.11767	0	2.8738	0	0	0	3.91438	0	0	0	0	2.65823	0	0	0	0	2.28226	0	0	0	0	0	2.65879	2.92573
F2S4_160404_037_H01	118	#665C47	Astro Aqp4	3	#808285	Non-Neuronal	0	0	0.221266	2.07653	0	0	0	0	2.6443	0	2.6456	0	2.74647	0	0	0	2.67585	0	2.93152	0	2.3003	0	2.50052	0	0	0	0	0	0	0	0.883339	2.03332	1.76448	2.29595
F2S4_160404_038_C01	118	#665C47	Astro Aqp4	3	#808285	Non-Neuronal	0	0	0	2.42409	0	0	0	0	0	0	3.09827	0	2.59516	1.79068	1.21905	0	2.65107	0.394778	2.24881	2.3327	2.2936	0	1.73518	0	0	0	0	1.46472	0	0	1.10907	0	2.17373	2.48924
F2S4_160404_038_D01	118	#665C47	Astro Aqp4	3	#808285	Non-Neuronal	2.05407	0	0	0	0	0	0	0	2.67774	0	2.93806	0	2.09919	0	0	2.39622	2.69294	0	2.40523	0	1.97466	0	1.82129	0	0	0	1.36531	2.40635	0	1.23846	0	0	0	0.362733
F2S4_160404_040_C01	118	#665C47	Astro Aqp4	3	#808285	Non-Neuronal	2.11439	0	0	1.85143	0	0	0	0	2.87846	0	2.75994	0	2.27995	0	2.17624	1.17996	3.15489	0	2.868	0	2.24489	0.215494	2.42752	0	1.78811	0	0	2.00252	0	0	0	0.215494	0	1.89618
F2S4_160404_042_B01	118	#665C47	Astro Aqp4	3	#808285	Non-Neuronal	2.31717	0	0	2.08341	0	0	0	0	2.33448	0	2.42811	0	2.40763	0	2.39758	0	2.41202	0	2.53242	2.1697	2.2544	2.17727	1.8716	0	2.62592	0	0	1.81928	0	0	0	2.37319	1.3754	2.34988
F2S4_160404_044_D01	118	#665C47	Astro Aqp4	3	#808285	Non-Neuronal	0	0	0	2.40152	0	0	0	0	2.04991	0	2.81842	0	2.61438	1.59643	0	0	2.98533	0	2.81478	0	1.91833	0	1.82985	0	0.722314	0	0	0	0	0	0	0	0	2.47936
F2S4_160404_051_C01	118	#665C47	Astro Aqp4	3	#808285	Non-Neuronal	2.27286	0	0	2.30586	0	0	0	0	2.74383	0	2.7429	0	2.8864	1.59629	2.24745	0	2.87007	1.25922	2.59354	1.16474	2.4124	0	1.98091	0	0.201909	0	2.03867	0	0	0	0	2.21891	1.54813	2.45228
F2S4_160404_051_E01	118	#665C47	Astro Aqp4	3	#808285	Non-Neuronal	0	0	0	1.96358	0	0	0	0	0.978024	0	2.88678	0	2.31347	2.06016	0	0	2.75808	0	2.58484	2.47623	2.3568	0	1.99631	0	0.363368	0	0	0	0	0	0	0	0	2.44474
F2S4_160404_051_G01	118	#665C47	Astro Aqp4	3	#808285	Non-Neuronal	0	0	0	0	0	0	0	0	2.64463	0	2.54702	0	3.05929	0	1.82376	0	2.90743	0	2.08997	2.52355	1.47091	0	2.31638	0	1.39691	0	2.26489	0	0	2.38924	0	0	0	0.248531
F2S4_160405_001_B01	130	#997F7A	Endo Ctla2a	4	#8D1800	Endothelial	3.0134	0	0	2.55121	1.48965	0	0	0	0	0	2.99513	0	2.883	2.4875	0	0	3.34157	1.23904	0	0	2.4167	0	0	0	2.32059	0	0	0	0	0	0.927863	2.56079	2.04051	2.63209
F2S4_160405_001_D01	130	#997F7A	Endo Ctla2a	4	#8D1800	Endothelial	3.34058	0	0	2.6133	0	2.06295	0	0	0	0	3.14853	0	2.26192	1.93179	2.15462	0	2.60057	0.840572	1.74686	0	2.46012	1.91386	0	0	1.64805	0	0	0	0	1.82087	1.88409	2.4301	2.29031	2.78218
F2S4_160405_001_E01	125	#89997A	VLMC Osr1 Mc5r	3	#808285	Non-Neuronal	2.92782	0	0	2.5233	2.43753	0	0	0	0	0	3.03886	0	2.50082	0	0	0	2.67111	0	2.54252	0	2.41775	0	1.71675	0	0	0	1.97795	1.96448	0	2.22131	0	2.56643	1.84922	0.832864
F2S4_160405_001_H01	130	#997F7A	Endo Ctla2a	4	#8D1800	Endothelial	3.18929	0	0	2.26293	0	0	0	0	0	0	3.09916	0	0.195729	0	0	0	3.23336	0	0	0	2.43096	0	0	0	1.58635	0	0	0	0	0	0	2.67488	1.42524	0.195729
F2S4_160405_002_C01	125	#89997A	VLMC Osr1 Mc5r	3	#808285	Non-Neuronal	1.98703	0	0	2.15455	1.08381	0	1.89708	0	0	0	2.75073	0	2.66184	2.05707	0	1.17774	2.80659	0	2.71742	1.68523	2.0659	0	2.34022	0	0	1.10429	2.19534	0	0	0	0	2.57231	1.70574	1.98964
F2S4_160405_002_G01	125	#89997A	VLMC Osr1 Mc5r	3	#808285	Non-Neuronal	2.64609	0	0	2.58116	0	0	0	0	0	0	3.21058	2.31536	2.39667	2.39002	0	0	3.07289	0.58403	2.76612	1.53876	2.1868	0.16817	1.92301	0	0	0	1.99306	0	0	0	0	2.45732	2.31833	2.36947
F2S4_160405_002_H01	130	#997F7A	Endo Ctla2a	4	#8D1800	Endothelial	2.97106	0	0	2.7065	0.179653	0	0	0	0	0	2.54776	0	2.36753	2.18662	0	0	2.98808	1.34255	0.707469	0	2.41196	0	0	0	2.49129	0	0	0	0	2.2847	0.707469	2.00172	2.33688	2.64806
F2S4_160405_003_D01	125	#89997A	VLMC Osr1 Mc5r	3	#808285	Non-Neuronal	2.65986	0	0	2.07207	0.426862	0	0	0	0	0	2.67547	0.325263	2.42083	1.75812	0	0	2.61936	0	2.61468	1.90087	2.39138	0	2.69593	0	0	0	0	1.1405	0	0	0	0	2.04891	2.71267
F2S4_160405_003_H01	130	#997F7A	Endo Ctla2a	4	#8D1800	Endothelial	3.09669	0	0	1.86124	0	0	0	0	0	0	2.7131	0	2.66058	2.13771	0	0	3.12793	0	2.37991	0	2.55821	0	0	0	3.04946	0	0	0	2.24492	0	0	2.55891	2.16102	2.71015
F2S4_160405_009_A01	125	#89997A	VLMC Osr1 Mc5r	3	#808285	Non-Neuronal	0	0	0	2.24726	0	0	0	0	0	0	3.02898	0	2.90827	2.09719	0	0	3.26857	1.36301	2.69663	0	2.10578	0	2.83865	0	0	0.151178	0	0	0	2.40224	0	2.25134	1.92355	0.151178
F2S4_160405_009_H01	130	#997F7A	Endo Ctla2a	4	#8D1800	Endothelial	3.18714	0	0	2.70276	0	0	0	0	0	0	2.91957	0	2.72213	2.04022	0	1.99905	3.0397	0	0.161684	0	2.23767	0	0.914708	0	2.47915	0	0	1.81923	0	2.26936	0	2.31054	2.3754	2.35512
F2S4_160405_010_C01	125	#89997A	VLMC Osr1 Mc5r	3	#808285	Non-Neuronal	2.44772	0	0	2.93187	2.65147	0	2.57664	0	0	0	3.10971	0	2.6786	1.83662	0	0	3.24601	0	2.30085	1.96229	2.73091	0	1.25092	0	0	0.135342	2.1681	0	0	0	0	0	0	1.84578
F2S4_160405_010_E01	130	#997F7A	Endo Ctla2a	4	#8D1800	Endothelial	3.15832	0	0	2.62904	0	0	0	0	0	0	2.81088	0	2.25595	1.90065	1.23483	0	3.00039	0	0	1.92278	2.53168	0	0	0	2.15909	1.18537	0	2.0931	0	0	0	1.35635	2.20773	0
F2S4_160405_010_F01	125	#89997A	VLMC Osr1 Mc5r	3	#808285	Non-Neuronal	2.31348	0	0	2.50568	1.37409	0	0	0	0	0	2.95221	0	2.74364	2.01279	0	0	3.22796	0	2.5359	2.04845	2.43276	0	2.06288	0	0	0	1.80302	0.953003	0	0	0	2.43744	1.38172	2.10636
F2S4_160405_010_H01	130	#997F7A	Endo Ctla2a	4	#8D1800	Endothelial	3.07644	0	0	2.19629	0	0	0	0	0	0	3.1195	0	0	0	0	0	1.61572	0	0	0	2.16049	0	0	0	2.92601	0	0	0	0	0	2.01883	2.43775	2.03903	2.5392
F2S4_160405_011_H01	130	#997F7A	Endo Ctla2a	4	#8D1800	Endothelial	2.7236	0	0	2.49195	0	0	0	0	0	0	2.68875	0	2.47	1.75667	2.66279	0	3.0117	0	2.11275	0	2.52034	0	0	0	2.60017	0	0	0.922579	0	2.46916	0	2.12027	1.80166	0
F2S4_160405_012_C01	130	#997F7A	Endo Ctla2a	4	#8D1800	Endothelial	2.74952	0	0	2.76582	0	0	0	0	0	0	0	0	2.97543	0	0	0	2.76788	0	0	0	2.3142	0	0	0	0.935715	0	0	0	0	2.65267	0	0	0	2.60306
F2S4_160405_012_D01	127	#74996B	VLMC Spp1 Col15a1	3	#808285	Non-Neuronal	2.01635	0	0	2.43514	0.562753	0	0	0	0	0	2.96091	0	2.69427	2.06363	0	0	3.04855	0	2.78015	0	1.58903	0	2.80658	0	0	0	2.28047	0	1.3338	0	0.918981	0	0	2.25879
F2S4_160405_012_F01	125	#89997A	VLMC Osr1 Mc5r	3	#808285	Non-Neuronal	2.71489	0	0	2.82615	0	0	0	0	0	0	2.30688	0	2.72193	1.49176	0	0	3.03867	0	2.98343	2.86342	2.30548	0	3.243	0	0	0	0	2.06892	0	0	0	0	2.03627	0.362781
F2S4_160405_012_G01	125	#89997A	VLMC Osr1 Mc5r	3	#808285	Non-Neuronal	2.37463	0	0	2.36754	0	0	0	0	0	0	2.69928	0	2.64997	1.88336	2.0351	0	2.56131	0	2.9646	2.41914	2.05756	0	2.66883	0	0	0	2.12708	0	0	0.868872	0	0	2.2808	1.82515
F2S4_160405_012_H01	130	#997F7A	Endo Ctla2a	4	#8D1800	Endothelial	2.81866	0	0	2.73438	0	0	0	0	0	0	2.37554	0	2.74777	1.74843	0	0	3.04894	0	0	2.48289	2.3473	0	0	0	2.45895	0	0	0	0	2.15942	0	0.225153	2.33246	0
F2S4_160405_014_A01	125	#89997A	VLMC Osr1 Mc5r	3	#808285	Non-Neuronal	0.205754	0	0	2.72828	0.205754	0	0	0	0	0	3.35195	0	2.42757	2.52495	2.75823	0	2.93284	0	2.10191	0	2.0146	0	0.719516	0	0	0	0	0.205754	0	2.74659	2.55749	2.59584	1.6891	1.72525
F2S4_160405_014_B01	125	#89997A	VLMC Osr1 Mc5r	3	#808285	Non-Neuronal	2.37212	0	0	2.32491	0.333554	0	0	0	0	0	2.60294	0	2.81664	2.1286	0	0.198042	2.42895	0	2.50818	0	1.82143	0	0	0	0	0	0	0	0	0	0	1.67942	1.58608	1.83264
F2S4_160405_014_D01	125	#89997A	VLMC Osr1 Mc5r	3	#808285	Non-Neuronal	2.88739	0	0	2.63746	1.48262	0	0	0	0	0	2.99075	0	2.66331	1.88307	2.18125	0	2.88832	0	2.4856	2.09946	2.18125	0	2.48402	0	0	0	2.46381	0	0	1.27278	0	2.4356	1.74296	2.55593
F2S4_160405_014_H01	125	#89997A	VLMC Osr1 Mc5r	3	#808285	Non-Neuronal	0	0	0	2.48215	0	0	0	0	0	0	2.66167	0	2.64314	1.78693	1.6239	0	2.45383	0	2.82673	2.22704	2.00397	2.41217	2.7675	0	0	0	0.708103	0	0	0	0.226439	2.32167	1.39713	0
F2S4_160405_015_B01	130	#997F7A	Endo Ctla2a	4	#8D1800	Endothelial	2.54524	0	0	2.53724	0	0	0	0	0	0	2.56235	0	2.79339	0.215091	0	0	3.29247	0.551905	2.42961	0	1.8916	0	0.35829	0	0	0.998828	0	0	0	0	0	2.48946	1.78709	0
F2S4_160405_015_C01	125	#89997A	VLMC Osr1 Mc5r	3	#808285	Non-Neuronal	2.32269	0	0	2.43151	1.52777	2.21304	0	0	0	0	2.98759	0	2.64388	2.08405	0	2.05197	2.57046	0	2.89614	1.62049	2.12209	1.63935	2.63652	0	0	0	0	0	0	0	0	2.01989	1.81416	1.38833
F2S4_160405_015_E01	125	#89997A	VLMC Osr1 Mc5r	3	#808285	Non-Neuronal	2.13462	0	0	2.5468	0	0	0	0	0	0	3.06916	0	2.68851	2.44812	1.55234	0	2.53985	0	1.85068	0	2.32485	0	1.91133	0	0	0	2.35697	0	0	0	0	2.21118	1.99012	2.92967
F2S4_160405_016_B01	125	#89997A	VLMC Osr1 Mc5r	3	#808285	Non-Neuronal	2.53281	0	0	2.67617	1.87749	0	0	0	0	0	2.23305	0	2.44505	2.16894	1.75665	0	2.60393	0	2.857	2.34179	2.53572	0	1.99264	0	0	0	0.196581	0.196581	0	1.24555	0.746612	0	1.88077	2.42121
F2S4_160405_016_C01	125	#89997A	VLMC Osr1 Mc5r	3	#808285	Non-Neuronal	2.65017	0	0	2.32013	0	0	0	0	0	0	3.22631	0	2.7173	2.36544	2.54661	0	3.04753	0	2.54661	0	2.24041	0	2.02824	0	0	0	2.54234	0	0	0	0	0	1.90466	2.50577
F2S4_160405_016_D01	125	#89997A	VLMC Osr1 Mc5r	3	#808285	Non-Neuronal	2.27082	0	0	2.64451	1.82084	0	0	0	0	0	2.70223	0	2.84118	0.861469	0	0	2.91066	0	2.91895	1.5098	2.26936	0	2.51286	0	0	0	0	0	1.48378	0	0	2.14471	1.85636	2.17667
F2S4_160405_016_F01	125	#89997A	VLMC Osr1 Mc5r	3	#808285	Non-Neuronal	2.50932	0	0	2.87665	0	0	0	0	0	0	2.83857	0	0	2.19216	0	0	2.68586	0	0	0	1.76958	0	1.28229	0	0	0	2.74645	0	0	0	0	0	0	2.1075
F2S4_160405_016_H01	130	#997F7A	Endo Ctla2a	4	#8D1800	Endothelial	2.87878	0	0	1.62298	1.98346	0	0	0	0	0	2.91731	0	2.69302	1.96215	2.552	1.70043	3.59759	0	0	0	2.34786	0	0	0	2.7347	0	0	0	0	2.41181	0	2.32321	0	1.73453
F2S4_160405_017_A01	125	#89997A	VLMC Osr1 Mc5r	3	#808285	Non-Neuronal	2.53462	0	0	2.55677	0	1.18567	0	0	0	0	3.02582	0	2.66633	2.27265	2.25199	0	2.95448	1.47974	2.41761	1.27688	2.18628	0	2.79947	0	0	0	1.97629	0	0	2.16247	0.748773	2.74303	2.43916	2.00359
F2S4_160405_017_B01	125	#89997A	VLMC Osr1 Mc5r	3	#808285	Non-Neuronal	2.28911	0	0	2.35643	0	0	0	0	0	0	2.86859	0.319638	0.188585	2.33947	0	0	2.56591	0	2.96069	0	2.24441	0	2.52489	0	0	0	1.1477	0	0	2.49798	0	0	0.188585	2.20205
F2S4_160405_017_F01	125	#89997A	VLMC Osr1 Mc5r	3	#808285	Non-Neuronal	2.62126	0	0	2.86832	0	0	0	0	0	0	2.98913	0	0	2.28008	0	0	3.05528	0	2.23942	0	2.18374	0	2.36097	0	0	0	2.45163	0	0	2.58434	0	2.1884	1.63107	0
F2S4_160405_017_G01	125	#89997A	VLMC Osr1 Mc5r	3	#808285	Non-Neuronal	2.53022	0	0	2.48862	0	0	0	0	0	0	2.79294	0	2.30702	1.79165	2.02219	0	3.25837	0	2.53417	2.42021	2.51406	0	2.04095	0	0	0	1.03363	0	0	0	0	1.76167	2.26892	2.49225
F2S4_160405_017_H01	125	#89997A	VLMC Osr1 Mc5r	3	#808285	Non-Neuronal	2.57551	0	0	2.21106	2.07097	0	0	0	0	0	2.87172	0	2.64022	2.02434	0	0	3.32414	0	2.54627	0	1.69892	0	0.993906	0	0	0	2.53254	0	0	0.828233	0	0.182191	2.23542	1.79227
F2S4_160405_020_C01	125	#89997A	VLMC Osr1 Mc5r	3	#808285	Non-Neuronal	2.79578	0	0	2.69582	0	0	0	0	0	0	3.19284	0	3.00517	1.71645	0	0	2.86949	1.20811	2.54402	1.8622	2.43543	0	2.48281	0	0	0	2.17839	0	0	0	0	2.28146	2.23864	2.47635
F2S4_160405_020_H01	125	#89997A	VLMC Osr1 Mc5r	3	#808285	Non-Neuronal	2.80833	0	0	2.26649	0	0	1.11371	0	0	0	3.14302	0	2.76419	1.86307	0	0	2.52667	0	2.37979	0.987764	1.71347	0	2.89722	0	0	0	2.29621	0	0	2.14106	0	2.64917	1.82583	2.28775
F2S4_160405_021_A01	130	#997F7A	Endo Ctla2a	4	#8D1800	Endothelial	2.97599	0	0	2.50077	0	0	0	0	0	0	2.82539	0	1.90164	2.04353	2.4119	0	3.38002	0	2.24869	0	2.46724	2.29158	0	0	0.26853	0	0	2.23268	0	2.60277	0	2.72975	2.30743	2.48706
F2S4_160405_021_B01	125	#89997A	VLMC Osr1 Mc5r	3	#808285	Non-Neuronal	2.09681	0	0	2.48011	0	0	0	0	0	0	2.95099	0	2.19807	1.56134	0	2.11972	2.59464	1.36918	2.366	0	2.17299	0	2.24939	0	0	0	2.50273	0	0	0	1.05758	2.66266	2.45068	0
F2S4_160405_021_E01	125	#89997A	VLMC Osr1 Mc5r	3	#808285	Non-Neuronal	2.37984	0	0	2.73116	0	0	0	0	0	0	3.15835	0	2.87411	2.52918	0	0	3.20271	0	2.796	0.966521	2.40526	0	0	0	0	0	0	0	0	0	0	0	0	1.86076
F2S4_160405_021_F01	130	#997F7A	Endo Ctla2a	4	#8D1800	Endothelial	2.50636	0	0	2.71164	0	0	0	0	0	0	2.85142	0	2.52758	1.88183	2.72414	0	2.71076	0	0	0	2.33789	0.308976	0	0	3.13926	0	0	0	0	0	0	0.181405	2.08934	2.38951
F2S4_160405_021_H01	130	#997F7A	Endo Ctla2a	4	#8D1800	Endothelial	3.26232	0	0	1.96567	0	0	0	0	0	0	2.87309	0	1.79087	1.69571	1.9506	0	3.17278	0	1.92812	0.937226	2.54567	0	0	0	0	0	0	1.3456	0	1.33669	0.740557	2.6813	1.40335	2.74695
F2S4_160405_022_A01	125	#89997A	VLMC Osr1 Mc5r	3	#808285	Non-Neuronal	2.7696	0	0	2.69676	2.11607	0	0	0	0	0	2.80241	0	2.44398	2.47435	0	0	3.12889	1.03427	2.80642	1.05355	2.01343	0	2.60549	0	0	0	2.72377	1.03427	1.32497	0	0	0.970717	1.65035	2.84036
F2S4_160405_022_B01	130	#997F7A	Endo Ctla2a	4	#8D1800	Endothelial	3.19597	0	0	2.35964	2.35964	1.40949	0	0	0	0	2.88821	0	2.70273	2.14215	0	0	3.04636	0.912637	1.92192	2.26171	2.58141	0.446296	0	0	2.11908	0.370298	0	1.43168	0	1.96199	1.24548	2.588	2.10554	2.14355
F2S4_160405_022_C01	125	#89997A	VLMC Osr1 Mc5r	3	#808285	Non-Neuronal	2.22668	0	0	2.61911	0	0	0	0	0	0	2.7359	0	2.22668	0	1.4331	0	2.68874	0	2.70114	1.9473	0.188627	0	1.31347	0	0	0	0	0	0	0	0	0.188627	2.03185	0
F2S4_160405_022_D01	130	#997F7A	Endo Ctla2a	4	#8D1800	Endothelial	3.11063	0	0	2.32503	0	2.35062	0	0	0	0	2.5692	0	2.43945	2.0894	0	0	3.10861	0	0	0.601299	2.33972	0	0	0	2.07088	0	0	0	0	1.91733	1.76243	1.50222	2.12979	2.776
F2S4_160405_022_E01	130	#997F7A	Endo Ctla2a	4	#8D1800	Endothelial	3.11185	0	0	2.34932	0.457871	0	0	0	0	0	2.80356	0	2.07255	0	0	0	3.30156	0	2.34076	0	2.39416	0	0	0	2.76019	0	0	0	0	1.01493	0	0	2.14418	2.03676
F2S4_160405_022_G01	125	#89997A	VLMC Osr1 Mc5r	3	#808285	Non-Neuronal	2.00131	0	0	2.81054	0.161778	0	0	0	0	0	3.13986	2.45056	2.60109	0.890452	2.49914	0.619051	3.22836	0	2.60695	0	2.21945	0	1.7198	0	0	1.36393	0	0	0	2.22299	0	0	0	2.59764
F2S4_160405_022_H01	125	#89997A	VLMC Osr1 Mc5r	3	#808285	Non-Neuronal	2.79644	0	0	2.85053	0	0.326691	0	0	0	0	2.98129	0	2.81993	0	1.84848	0	2.66887	0	2.75907	2.46967	2.33408	0	2.7205	0	0	0	2.4133	0	0	1.838	2.42718	2.24687	1.50308	2.14293
F2S4_160405_023_B01	125	#89997A	VLMC Osr1 Mc5r	3	#808285	Non-Neuronal	0	0	0	3.15371	0	0	0	0	0	0	3.30106	0	2.48548	0	0	0	3.36715	0	2.90493	0	2.4806	0	0	0	0	0	0	0	0	1.61621	0	0.374187	1.9083	0
F2S4_160405_023_C01	125	#89997A	VLMC Osr1 Mc5r	3	#808285	Non-Neuronal	2.95221	0	0	2.80121	0	0	0	0	0	0	3.0687	0	2.37516	2.41678	0	0	3.35902	1.18516	2.24202	1.85364	2.13295	0	2.54771	0	0	0	2.43903	0	0	2.2315	0	2.22538	0.878625	2.32177
F2S4_160405_023_H01	130	#997F7A	Endo Ctla2a	4	#8D1800	Endothelial	2.59929	0	0	2.66278	0	0	0	0	0	0	2.63459	0	2.08986	0	0	2.42746	3.68508	0	0	0	2.38537	0	0	0	2.70486	0	0	0	0	0	2.58705	2.35013	2.02381	0
F2S4_160405_024_H01	118	#665C47	Astro Aqp4	3	#808285	Non-Neuronal	0.191768	0	0	2.38963	0	2.23548	0	0	0.191768	0	2.4458	0	2.39935	0	2.49321	0	2.81621	1.40528	0	1.97177	2.30764	0	2.1385	0	0.191768	0	2.24928	2.35057	0	2.22984	0	2.13321	1.78103	2.05147
F2S4_160405_026_E01	118	#665C47	Astro Aqp4	3	#808285	Non-Neuronal	0	0	0	1.96938	0	0	0	0	2.83651	0	2.7707	0	2.66287	0	2.02571	0	2.74266	1.51798	2.79704	0	2.4073	0	0.348154	0	1.54923	0	2.18415	0	0	0.208068	1.16201	2.21287	1.38659	1.61225
F2S4_160405_027_E01	118	#665C47	Astro Aqp4	3	#808285	Non-Neuronal	0	0	0	2.40054	0	0	0	0	1.81298	0	2.82249	0	1.49358	0	2.21511	0	2.73744	0	0	0	2.32782	0	2.57285	0	0	1.76978	1.53448	0	0	0	0	1.0593	1.87779	2.47372
F2S4_160405_034_H01	118	#665C47	Astro Aqp4	3	#808285	Non-Neuronal	0	0	0	2.21046	0	0	0	0	1.75755	0	0	0	2.84078	0	2.26148	0	3.39921	0	2.53077	0.193737	2.30351	0	2.54631	0	2.28109	0	0	0	0	0	0	0	0	0.193737
F2S4_160405_040_E01	118	#665C47	Astro Aqp4	3	#808285	Non-Neuronal	0	0	0	1.65666	0.683412	0	0	0	3.02885	0	0.403055	0	2.55036	0	2.40115	0	2.97462	0	2.88151	0	2.02125	0	3.00751	0	1.21209	2.12237	0	0.246698	1.92616	1.91821	0	0	1.49958	2.05178
F2S4_160405_040_H01	118	#665C47	Astro Aqp4	3	#808285	Non-Neuronal	1.72255	0	0	2.40797	2.32011	1.83511	0	0	2.61838	0	2.66403	2.40235	2.15599	1.69462	0	2.05859	2.90711	0.632279	2.28266	1.26158	2.57881	0	1.95319	0	0.964759	1.31659	2.52792	2.22923	0	1.89815	0	2.52473	1.82986	2.11415
F2S4_160405_041_E01	118	#665C47	Astro Aqp4	3	#808285	Non-Neuronal	2.18636	0	0	0.205613	0	0	0	0	2.88989	0	2.21932	2.68611	2.72791	1.81009	0	0	2.95287	1.09707	0.205613	0	1.96866	0	1.5927	0	0	0	0	0	0	0	0	2.29488	1.93943	0.344593
F2S4_160405_042_H01	118	#665C47	Astro Aqp4	3	#808285	Non-Neuronal	1.79128	0	0	2.25852	0	0	0	0	1.9332	0	3.19571	0	2.46886	2.11491	0	0	3.19284	0	2.37231	1.98987	2.47837	1.22411	1.56647	0	2.43814	0	1.95988	2.15797	0	0	0	1.92766	1.60912	2.46805
F2S4_160413_006_E01	118	#665C47	Astro Aqp4	3	#808285	Non-Neuronal	1.9666	0	0	2.24898	0	0	0	0	2.937	0	2.90306	1.43151	2.30354	2.0529	0	0	2.85814	0	2.46901	0	2.14817	0	0.19463	0	0	0	0	0	0	0	0	2.32264	0	2.47727
F2S4_160413_007_B01	132	#4C6647	PVM Mrc1	3	#808285	Non-Neuronal	2.88236	0	2.73612	2.67344	0	1.1942	0	0	0	0	2.94836	0	2.68264	2.27011	2.35339	1.62208	3.69379	1.45883	2.59741	2.18308	1.85226	0	2.30296	0	0	0	2.14398	0	0	2.39061	0	2.10961	2.21362	2.55618
F2S4_160413_007_F01	132	#4C6647	PVM Mrc1	3	#808285	Non-Neuronal	3.08288	0	2.33728	2.5021	0	2.22464	0	0	0	0	2.86441	0	2.86501	0	0	2.11134	3.78254	1.00529	2.48442	0	1.90067	0	0	0	0	0	2.07028	0	0	0	0	2.17756	1.9552	2.63476
F2S4_160413_007_G01	123	#476662	Oligo Synpr	3	#808285	Non-Neuronal	2.08426	0	0	2.4068	1.48958	0.518243	0	0	0	0	3.11403	2.01682	2.97289	1.54985	0	0	0	1.09655	2.1623	1.95501	2.40366	0.71065	0.16423	0	0	0.71065	0	1.90584	0	0	0	2.36924	1.78352	2.22606
F2S4_160413_009_D01	132	#4C6647	PVM Mrc1	3	#808285	Non-Neuronal	3.18921	0	2.92124	1.6009	0	0	0	0	0	0	2.64253	0	2.47915	0	2.56577	0	4.05633	0	2.07071	0	0	0	2.70861	0	0	0	0.786579	2.01646	0	0	0	0	1.53484	1.83277
F2S4_160413_014_D01	118	#665C47	Astro Aqp4	3	#808285	Non-Neuronal	0.244798	0	0	1.81021	0	0	0	0	2.04446	0	2.30781	0	2.0787	1.92962	0	0	2.50787	0	0	0	1.62983	0	2.97757	0	0	0	0	0	0	2.0922	0	1.11773	0	0
F2S4_160413_015_H01	120	#475D4B	OPC Pdgfra Ccnb1	3	#808285	Non-Neuronal	0	0	0	1.76015	1.95082	0	0	0	0	0	2.86666	0	2.53284	0	0	1.84067	0	0.765563	2.30921	1.44564	2.20318	0	2.7975	0	1.4666	1.05488	0	0	0	0	0	1.7221	1.8275	2.57067
F2S4_160413_021_C01	118	#665C47	Astro Aqp4	3	#808285	Non-Neuronal	0	0	0	0	1.78726	0	0	0	2.55196	0	2.69622	0	2.9038	0	0	0	3.1257	0	0	0	2.00715	0	2.57982	0	0	0	0	0	0	0	0	0	0	1.97976
F2S4_160413_021_F01	118	#665C47	Astro Aqp4	3	#808285	Non-Neuronal	2.24102	0	0	2.11887	0	0	0	0	2.08422	0	0	0	2.8144	2.18758	2.59771	0	2.82725	1.24569	0	0	1.99242	0	2.69777	0	0	0	0	0	1.34932	0	0	0	1.74942	0.202246
F2S4_160413_024_A01	118	#665C47	Astro Aqp4	3	#808285	Non-Neuronal	2.45507	0	0	2.32471	0	0	0	0	2.87903	0	3.09946	0	2.51333	2.18858	0	1.62893	3.0967	0	2.75487	2.19541	2.2419	0	1.17767	0	0	0	2.03317	2.11779	0	0	0	2.71583	0	2.07308
F2S4_160413_024_H01	118	#665C47	Astro Aqp4	3	#808285	Non-Neuronal	2.11557	0	0	2.26436	0	0	0	0	2.40911	0	2.77055	2.48723	2.51749	2.42068	0	0	0	0	2.97407	0	1.91755	0	2.5292	0	0	0	0	0	0	0	1.1717	1.56009	0.488178	2.30495
F2S4_160414_009_B01	132	#4C6647	PVM Mrc1	3	#808285	Non-Neuronal	1.66087	0	3.07874	2.78745	0	0	0	0	0	0	3.16308	0	0.266064	0	0	0	3.91441	0	0	1.98078	0	0	0.548495	0	0	0	0	1.01276	0	2.64316	0	2.93611	1.46081	2.35381
F2S4_160419_001_A01	118	#665C47	Astro Aqp4	3	#808285	Non-Neuronal	0	0	0	2.16292	0	0	0	0	2.57549	0	2.76862	0	2.2237	1.55894	2.50815	2.03045	3.07708	0.977775	2.50322	0	2.02551	2.17893	2.58176	0	2.03777	0	1.90605	0	2.32324	1.0982	2.15376	1.0982	1.63244	2.22054
F2S4_160419_001_B01	118	#665C47	Astro Aqp4	3	#808285	Non-Neuronal	0.200225	0	0	1.93414	0	0	0	0	0	0	2.74482	0	2.7439	1.79588	0	2.0893	3.31922	0	2.19535	0	1.73946	0	1.33244	0	0	0	2.29623	0	0	0	2.06808	0	0	1.34411
F2S4_160419_004_B01	118	#665C47	Astro Aqp4	3	#808285	Non-Neuronal	2.28431	0	0	2.47257	0	0	0	0	2.66532	0	2.57484	0	2.92348	2.34861	0	0	2.96104	0	1.87339	0	0.707153	0	2.1105	0	1.60101	0	0	0	0	2.47999	0	0	2.11393	0
F2S4_160419_006_A01	122	#6C8581	Oligo Serpinb1a	3	#808285	Non-Neuronal	1.73059	0	0.288346	2.94602	2.30071	2.06083	0	0	0	0	2.83761	0	3.02038	2.24623	0	0	2.00388	1.09023	1.94766	1.92394	2.35094	0	0	0	0	1.4066	0	0	0	1.91407	0	2.54486	2.18393	2.46849
F2S4_160419_006_H01	118	#665C47	Astro Aqp4	3	#808285	Non-Neuronal	2.20181	0	0	2.26052	0	0	0	0	1.96919	0	2.91959	0	2.60956	0	0	0	3.15759	0	2.85517	0	2.56993	0	2.73356	0	0	0	0	0	0	0	0	0	1.90687	0
F2S4_160419_017_A01	118	#665C47	Astro Aqp4	3	#808285	Non-Neuronal	0.249126	0	0	2.39332	0.249126	0	0	0	2.92026	0	2.52491	0	2.94194	1.69728	0	0	0.687842	0	2.8283	0	2.48495	0	0.941861	0	0	0	0	0	0	0	0	0	0	0.249126
F2S4_160419_017_B01	118	#665C47	Astro Aqp4	3	#808285	Non-Neuronal	0	0	0	0	0	0	0	0	3.16413	0	2.98666	0	2.65349	0	1.31562	0	3.08593	0	0.433222	0	2.26916	0	2.98281	0	0.939625	0	2.48158	0	0	0	0	0.268529	1.9501	0
F2S4_160419_017_E01	118	#665C47	Astro Aqp4	3	#808285	Non-Neuronal	0	0	0	2.252	0	0	0	0	0	0	2.44901	0	3.00083	1.97051	0	0	2.9251	0	2.66912	0	2.65408	0	2.84017	0	0.236072	0	0	0	0	2.08235	0	0	0	2.50639
F2S4_160419_021_A01	118	#665C47	Astro Aqp4	3	#808285	Non-Neuronal	2.26224	0	0	2.15495	1.63997	0	0	0	2.69341	0	2.70025	0	2.28831	1.74008	2.31473	2.33091	2.50337	1.02425	2.82004	1.60387	2.15759	0	1.89946	0	1.14785	0	0	0	1.02425	1.24396	0.986944	1.09043	1.80392	0
F2S4_160419_021_D01	118	#665C47	Astro Aqp4	3	#808285	Non-Neuronal	2.28401	0	0	2.70578	1.83796	0	0	0	0	0	2.91089	0	0	2.0655	0	0	2.94965	0	0	1.17315	2.38415	0	0	0	1.45936	0	0	0	0	2.49143	0	0.420808	0	3.04646
F2S4_160419_021_G01	118	#665C47	Astro Aqp4	3	#808285	Non-Neuronal	2.08392	0	0	2.15239	0	0	0	0	2.55769	0	3.05279	2.22409	2.78854	2.4202	0	0	2.92758	0	2.65513	0.254499	2.96777	0	1.70244	0	0	0	2.23631	2.42542	0	0	0	1.50617	0	1.30369
F2S4_160419_022_B01	118	#665C47	Astro Aqp4	3	#808285	Non-Neuronal	0	0	0	2.33326	0	0	0	0	2.76525	0	2.90742	0	3.10544	0.599653	0	1.46672	3.00931	0	3.03601	0	2.68097	0	0	0	0	0	0	0	0	0	0	1.60699	0	0
F2S4_160419_022_G01	118	#665C47	Astro Aqp4	3	#808285	Non-Neuronal	2.11995	0	0	2.34291	0	0	0	0	2.31282	0	3.03639	0	2.83108	0.207939	0.347966	0	2.84158	0	1.78664	0	2.23484	2.41113	2.55958	0	2.73305	0	1.22962	0	0	2.04983	0	0	0	0
F2S4_160419_023_A01	132	#4C6647	PVM Mrc1	3	#808285	Non-Neuronal	3.44858	0	2.79503	2.33254	2.25055	0	0	0	0	0	2.79318	0	2.75254	0	0	0	3.73089	0	2.48416	0.732743	1.15269	0	0	0	0	0	1.96666	0	0	0	0	2.32355	2.16537	2.46492
F2S4_160429_011_A01	130	#997F7A	Endo Ctla2a	4	#8D1800	Endothelial	3.00257	0	0	2.57676	2.72863	0	0	0	0	0	0	0	2.95879	0	0	0.191532	0	0	2.23622	0	2.64016	0	0	0	2.45199	0	0	0	0	1.23235	0.576509	2.53739	1.66179	0
F2S4_160429_013_F01	130	#997F7A	Endo Ctla2a	4	#8D1800	Endothelial	2.54433	0	0	2.44648	0	0	0	0	0	0	3.09197	0	2.92465	1.85866	2.21969	0	3.51167	0	0	1.03198	2.48161	0	0	0	1.03198	0	0	0	1.60267	0	0	0	1.98382	2.34996
F2S4_160504_002_F01	130	#997F7A	Endo Ctla2a	4	#8D1800	Endothelial	3.14056	0	0	2.6099	0	0	0	0	0	0	3.34271	0	2.98388	2.32744	0	0	3.33017	0	0	0	2.79078	0	0	0	0	0	0	0	0	0	0	0	2.53592	2.7001
F2S4_160504_002_G01	130	#997F7A	Endo Ctla2a	4	#8D1800	Endothelial	3.21317	0	0	2.68493	0	0	0	0	0	0	2.71872	0	2.69441	1.69084	0	2.27813	3.232	0	2.15486	0	2.60122	2.35169	0.202348	0	1.90273	0	0	0	0	2.46774	0	0	2.02061	2.66644
F2S4_160504_005_A01	130	#997F7A	Endo Ctla2a	4	#8D1800	Endothelial	3.39607	0	0	2.47441	0	0	0	0	0	0	2.9608	0	2.6485	2.02503	0	0	3.04023	1.94836	2.51346	2.20681	2.61259	2.14841	0	0	0	0.407968	0	1.0565	0	2.24694	0.488249	1.54759	2.10812	2.82713
F2S4_160504_005_F01	131	#805F59	Endo Cytl1	4	#8D1800	Endothelial	2.93702	0	0	2.64238	0	0	0	0	0	0	2.70358	0	2.8555	2.43863	0	0	0	0	0	0	2.49296	0	0	0	0	0	0	0	1.54821	0	0	0	2.2816	0
F2S4_160504_006_B01	130	#997F7A	Endo Ctla2a	4	#8D1800	Endothelial	3.22914	0	0	2.88651	0	0	0	0	0	0	3.13605	0	2.57614	2.32972	0	0	3.20808	0	0	0	2.76101	0	0	0	0	0	0	0	0	0	0	0	1.9851	1.84848
F2S4_160504_006_D01	130	#997F7A	Endo Ctla2a	4	#8D1800	Endothelial	3.21848	0	0	0	0	0	0	0	0	0	0	0	3.1626	0	0	0	0	0	0	0	2.41081	0	0	0	0	0	0	0	0	0	0	2.86577	0	0
F2S4_160504_006_F01	130	#997F7A	Endo Ctla2a	4	#8D1800	Endothelial	3.17822	0	0	2.43076	0	0	0	0	0	0	3.0358	0	2.67946	2.14953	2.82736	0	2.6601	0	0	0	2.98109	0	0	0	2.49641	0	0	2.82095	0	2.44991	0	0	1.72983	1.70078
F2S4_160504_007_C01	130	#997F7A	Endo Ctla2a	4	#8D1800	Endothelial	2.95365	0	0	2.64979	0	0	0	0	0	0	0	0	2.98549	2.93729	0	0	3.43979	0	2.69829	0	3.00814	0	0	0	2.22544	0	0	0	0	0.295984	0	2.53765	2.16018	3.14761
F2S4_160504_007_D01	130	#997F7A	Endo Ctla2a	4	#8D1800	Endothelial	3.60215	0	0	2.84077	0	0	0	0	0	0	2.77577	0	3.01479	1.5688	0	0	3.62331	0	2.43499	2.37656	2.95789	0	1.18138	0	0	0	0	0	0	1.31181	0	1.29911	2.04271	2.63293
F2S4_160504_007_E01	130	#997F7A	Endo Ctla2a	4	#8D1800	Endothelial	2.91682	0	0	2.59662	0	0	0	0	0	0	2.66262	0	2.80134	2.17881	0	0	3.00747	2.0428	2.43748	0	2.70663	0	0	0	1.08898	0	0	0	0	2.77708	2.2116	2.52686	2.2336	2.77585
F2S4_160504_008_A01	130	#997F7A	Endo Ctla2a	4	#8D1800	Endothelial	2.88805	0	0.164009	2.14049	0	0	0	0	0	0	2.8878	0	2.37865	2.04759	0	2.26283	3.30236	0	0	1.92926	2.47537	0	0	0	0	0	0	0	0	0	0	0	1.37916	2.54029
F2S4_160504_010_A01	130	#997F7A	Endo Ctla2a	4	#8D1800	Endothelial	3.10109	0	0	2.40265	2.05617	0	0	0	0	0	3.02414	0	2.64289	0	0	0	2.8305	0.839564	2.07817	0.693807	2.4018	0	0	0	0	0	0	0	0	2.12712	0	2.66933	1.57917	0
F2S4_160616_014_G01	131	#805F59	Endo Cytl1	4	#8D1800	Endothelial	3.34254	0	0	1.91031	0	0	0	0	0	0	3.33737	0	2.94682	2.41031	0	0	0	0	0	0	1.31265	0	0	0	0	0	0	0	0	0	0	0	0	0.501249
F2S4_160616_015_B01	131	#805F59	Endo Cytl1	4	#8D1800	Endothelial	3.30117	0	0	2.54373	2.23638	0	0	0	0	0	3.09648	0	2.52758	1.79807	0	0	3.13234	0	0	0	2.71857	0	0	0	0	1.91185	0	0	0	0	0	0	1.78391	2.42335
F2S4_160617_001_D01	130	#997F7A	Endo Ctla2a	4	#8D1800	Endothelial	2.87411	0	0	2.49955	1.56807	1.75421	0	0	0	0	2.78305	0	2.85816	1.71587	0	0	3.19443	0	0	0.53138	2.71836	0	0	0	0.342346	1.49123	0	1.82203	0	2.43475	0.880692	2.58735	1.71587	2.347
F2S4_160617_002_B01	130	#997F7A	Endo Ctla2a	4	#8D1800	Endothelial	3.03584	0	0	2.56721	1.86923	0	0	0	0	0	2.76481	0	2.73897	2.11284	0	0	2.87804	0	0	0	2.49256	0.183321	0	0	0	0	0	2.09853	0	0	0	2.16732	0	1.32133
F2S4_160617_002_H01	130	#997F7A	Endo Ctla2a	4	#8D1800	Endothelial	3.17957	0	0	2.37915	2.48429	0	0	0	0	0	3.06726	0	2.80436	2.22025	0	0	3.48506	0	0	2.10622	2.80132	0	0	0	1.96446	0	0	0	2.35744	0	0	2.19941	1.96966	2.66122
F2S4_160617_003_H01	130	#997F7A	Endo Ctla2a	4	#8D1800	Endothelial	2.34883	0	0	2.51843	0	0	0	0	0	0	3.02242	0	2.65006	1.98047	0	2.58378	3.34717	0	0	0.0938884	2.94966	0	0	0	2.14088	0	0	0	0	2.46366	2.70775	0	1.73314	0.171044
F2S4_160617_005_F01	130	#997F7A	Endo Ctla2a	4	#8D1800	Endothelial	2.90047	0	0	2.84314	0	0	0	0	0	0	2.93225	0	2.78468	0.21016	0	0	3.16655	0	0	2.28207	2.90318	0	0	0	0	0	0	0	0	0	2.10711	0	1.08648	0
F2S4_160617_005_G01	130	#997F7A	Endo Ctla2a	4	#8D1800	Endothelial	3.29817	0	0	2.83063	0	0	0	0	0	0	3.07419	0	2.87464	2.45655	0	0	2.71408	0	0	0	2.25896	0	0	0	1.75608	0	0	2.39579	2.37805	0	0	0	2.32257	0
F2S4_160620_038_D01	127	#74996B	VLMC Spp1 Col15a1	3	#808285	Non-Neuronal	2.86113	0	0	2.79449	2.39672	0	0	0	0	0	2.36312	0	2.80859	2.78351	0	0	1.49966	0	2.6067	2.29365	2.5601	0	2.959	0	0	0	2.27439	0	0	0	0	2.69115	1.8242	2.62413
F2S4_160705_002_B01	127	#74996B	VLMC Spp1 Col15a1	3	#808285	Non-Neuronal	2.77909	0	0	2.43269	2.27656	0	0	0	0	0	3.32143	0	2.67055	1.97782	2.15662	2.2941	2.65958	0	2.81641	1.68882	1.97013	0	2.49337	0	0	1.66857	2.24749	0	0	0.192105	0	1.94068	1.86853	3.07368
F2S4_160707_009_B01	127	#74996B	VLMC Spp1 Col15a1	3	#808285	Non-Neuronal	3.14374	0	0	0	0	0	0	0	0	0	3.34326	0	2.55355	1.82538	0	0	2.66771	0	2.53858	0.244866	2.35834	0	2.46288	0	0	0	1.77319	0	0	0	0	0	0	1.58106
F2S4_160707_009_H01	130	#997F7A	Endo Ctla2a	4	#8D1800	Endothelial	3.51948	0	0	2.80993	0.475578	0	0	0	0	0	2.89513	0	2.77318	2.42637	0	0	3.22771	0	2.51135	0	2.71729	0	0	0	2.86081	0	0	0	0	0	0	2.77752	2.15707	2.99259
F2S4_160707_010_F01	130	#997F7A	Endo Ctla2a	4	#8D1800	Endothelial	3.17731	0	0	2.18867	0	0	0	0	0	0	2.48484	0	2.84501	2.32807	0	0	3.52007	0	0	0.25808	2.86035	0	0	0	2.13529	0	0	0	0	0	1.45632	2.60155	2.08903	2.92984
F2S4_160707_010_H01	130	#997F7A	Endo Ctla2a	4	#8D1800	Endothelial	2.86431	0	0	2.7004	0	0	0	0	0	0	3.04386	0	2.82898	2.33139	0	0.227538	2.99438	0	0	0	2.40201	0	0.966787	0	2.20058	1.72139	0	0.933239	0	2.18912	0.764962	2.37889	1.57401	2.52414
F2S4_160713_007_A01	127	#74996B	VLMC Spp1 Col15a1	3	#808285	Non-Neuronal	2.11573	0	0	2.11573	2.40559	0	0	0	0	0	2.98916	0	2.78077	2.125	2.32675	2.13408	2.62963	1.37159	2.38593	0.975344	2.37057	0	2.83409	0	0	0	2.70817	0	0	2.05554	0	2.31507	1.66329	2.58748
F2S4_160713_007_G01	127	#74996B	VLMC Spp1 Col15a1	3	#808285	Non-Neuronal	0	0	0	2.47017	0	0	0	0	0	0	2.9602	0	2.65191	1.52147	0	0	2.53778	0	2.40346	0	2.47529	0	2.59551	0	0	0	0	0	0	0	0	0	1.50276	0
F2S4_160713_008_B01	130	#997F7A	Endo Ctla2a	4	#8D1800	Endothelial	3.20635	0	0	2.91715	1.69254	0	0	0	0	0	3.09728	0	3.00004	2.51105	0	0	3.22171	0	0	0	2.58784	0	0	0	2.62418	0	0	0	0	0.765407	0	0	2.277	2.68453
F2S4_160714_001_F01	130	#997F7A	Endo Ctla2a	4	#8D1800	Endothelial	0	0	0	2.11409	0	0	0	0	0	0	0	0	2.38706	0	0	0	2.61308	0	0	0	2.51359	0	0	0	3.1501	0	0	0	0	2.67053	0	2.58983	0	0
F2S4_160714_001_H01	127	#74996B	VLMC Spp1 Col15a1	3	#808285	Non-Neuronal	0	0	0	2.43334	2.15217	0	0	0	0	0	2.96557	0	2.63354	1.24311	0.486125	1.56533	2.22018	0	2.57807	0.85664	2.37448	0	2.64855	0	0	0	2.07653	0	0	0	0	2.68643	1.83931	2.52349
F2S4_160715_001_D01	130	#997F7A	Endo Ctla2a	4	#8D1800	Endothelial	2.65628	0	0	2.28537	0	0	0	0	0	0	2.89746	1.93007	2.12205	1.90238	0	0	3.31763	0	0	1.82429	2.24183	0	0	0	0	0	0	0	0	2.17855	2.14717	2.29125	1.78864	2.38064
F2S4_160715_001_F01	130	#997F7A	Endo Ctla2a	4	#8D1800	Endothelial	3.33256	0	0	0	0	0	0	0	0	0	3.03711	0	2.8293	2.67916	0	0	2.60978	0	2.73966	3.02189	2.34185	0	0.277081	0	0	0	0	0	0	0	0	1.48372	2.21344	2.99254
F2S4_160715_001_G01	130	#997F7A	Endo Ctla2a	4	#8D1800	Endothelial	3.21346	0	0	2.03099	0	0	0	0	0	0	2.55866	0	2.34417	0	0	0	3.24436	0	0	0	2.21937	0	0	0	0	0	0	0	0	0	0	2.35939	1.88008	1.93109
F2S4_160715_001_H01	130	#997F7A	Endo Ctla2a	4	#8D1800	Endothelial	3.36909	0	0	1.78716	0	0	0	0	0	0	2.29021	0	2.6594	0.811442	0	0.251047	3.13985	0	0	0	2.26511	0	2.17062	0	1.83443	0	0	0.409112	0	2.33487	0	2.41372	0	2.52424
F2S4_160715_002_B01	130	#997F7A	Endo Ctla2a	4	#8D1800	Endothelial	3.45527	0	0	2.045	0	0	0	0	0	0	3.34561	0	2.91825	2.93387	0	0	2.77409	0	0	0	2.52303	0	0	0	0	0	0	0	0	0	0	0	2.0631	0
F2S4_160715_002_C01	130	#997F7A	Endo Ctla2a	4	#8D1800	Endothelial	2.97947	0	0	2.4539	0	0	0	0	0	0	2.40762	0	2.04879	1.28037	0	0	3.28251	0	0	0	2.83374	0	0	0	0.539601	0	0	0	0	0	0.708164	1.22028	2.25344	2.1869
F2S4_160715_002_D01	130	#997F7A	Endo Ctla2a	4	#8D1800	Endothelial	3.08107	0	0	2.445	0	0	0	0	0	0	2.86793	0	2.83634	2.55314	0	0	3.3998	0	2.50089	0	2.92108	0	0	0	0	0	0	0	1.18343	2.31509	1.66995	2.26851	1.54112	2.47765
F2S4_160715_002_E01	130	#997F7A	Endo Ctla2a	4	#8D1800	Endothelial	3.02211	0	0	2.70995	0	0	2.52596	0	0	0	2.5707	1.51887	2.50687	0	0	0	3.33268	1.49336	0	0	2.74321	0	2.01698	0	0	0	0	0	0	0	1.18874	0	1.41696	2.87224
F2S4_160715_002_G01	130	#997F7A	Endo Ctla2a	4	#8D1800	Endothelial	2.85736	0	0	2.35283	0	0	0	0	0	0	3.1214	0	2.66777	0	2.72024	0	1.69021	0	0	0	2.58987	0	0	0	2.41598	0	0	0	1.49649	2.85618	0	2.73849	2.09834	0
F2S4_160715_002_H01	126	#6B8059	VLMC Spp1 Hs3st6	3	#808285	Non-Neuronal	0.490903	0	0	3.3843	0	2.06565	0	0	0	0	3.08308	0	3.43061	2.39149	0	0	0	0	3.06971	0	3.03037	0	3.17217	0	0	0	0	0	0	0	0	0	0	0
F2S4_160715_003_D01	130	#997F7A	Endo Ctla2a	4	#8D1800	Endothelial	3.08822	0	0	2.91532	0	0	0	0	0	0	2.29282	0	2.74475	2.04774	0	0	1.92506	1.40653	1.75909	0	2.56643	0.241151	0	0	1.91732	0	0	0	0	2.77609	0	0	2.20176	2.63208
F2S4_160715_004_A01	130	#997F7A	Endo Ctla2a	4	#8D1800	Endothelial	2.91878	0	0	2.09468	0	0	0	0	0	0	2.35265	0	2.9354	1.77171	2.16031	0	3.11444	0	0	0	2.26897	0	0	0	2.16846	0	0	0	0	2.46802	0	2.57773	1.52307	1.60719
F2S4_160715_004_B01	130	#997F7A	Endo Ctla2a	4	#8D1800	Endothelial	2.18799	0	0	2.03776	2.20082	0	0	0	0	0	3.0618	0	2.37122	1.23511	0	0	3.28758	0	0	0	2.14345	0	0	0	0	0	0	0	0	0	0	0	1.83281	2.69527
F2S4_160715_004_C01	130	#997F7A	Endo Ctla2a	4	#8D1800	Endothelial	3.34805	0	0	2.65914	0	0	0	0	0	0	2.77153	2.69226	2.77634	2.10561	2.1566	0	2.19468	1.30473	0.189701	0	2.52734	0	0	0	2.80148	0	0	2.14483	0	0	1.64613	0	2.3759	2.18702
F2S4_160715_004_F01	130	#997F7A	Endo Ctla2a	4	#8D1800	Endothelial	2.87759	0	0	2.34586	1.08417	0	0	0	0	0	2.57245	0	2.97299	2.40768	0	0	2.70872	1.16644	0	0	1.79423	0	0	0	2.70527	0	0	0	0	0	0	2.58806	0	2.70135
F2S4_160715_004_G01	130	#997F7A	Endo Ctla2a	4	#8D1800	Endothelial	2.80941	0	0	2.37652	0	0	0	0	0	0	2.96328	0	2.25061	1.49775	0	2.06686	3.26989	0	2.12774	1.55758	2.55979	0	0	0	2.03703	0	0	0	0	0	0	2.3513	1.29194	2.32665
F2S4_160715_004_H01	130	#997F7A	Endo Ctla2a	4	#8D1800	Endothelial	2.4994	0	0	2.84555	0	0	0	0	0	0	0	0	2.87595	0	0	0	4.00559	0	0	2.88291	2.71658	0	0	0	0.323157	0	0	0	0	0	0	3.02699	0	0
F2S4_160715_005_D01	130	#997F7A	Endo Ctla2a	4	#8D1800	Endothelial	2.47688	0	0	2.66048	0	2.26822	0	0	0	0	2.97922	0	2.31173	1.87434	0	0	3.51494	1.1111	0	2.43411	2.78946	0	0	0	0.827327	0	0	1.45703	0	0	0	2.15398	2.11129	1.80559
F2S4_160715_005_F01	130	#997F7A	Endo Ctla2a	4	#8D1800	Endothelial	2.89681	0	0	2.59501	0	1.31698	0	0	0	0	2.92926	0.17075	2.69897	0	0	0	3.3857	0	0	0	2.48898	2.39038	0	0	0	0	0	0	0	2.24274	0	0	1.59696	3.04165
F2S4_160715_005_G01	130	#997F7A	Endo Ctla2a	4	#8D1800	Endothelial	3.02734	0	0	2.06558	1.27697	0	0	0	0	0	3.07462	0	2.2055	2.22292	0	0	3.08005	0	0	1.587	2.50273	0	0	0	2.56066	0	0	0	0	2.41543	0	2.66651	0	2.29039
F2S4_160715_005_H01	130	#997F7A	Endo Ctla2a	4	#8D1800	Endothelial	3.16011	0	0	0	2.64838	0	0	0	0	0	2.76385	0	2.6409	2.06481	0	0	0.19982	0	2.12777	2.58594	1.87621	0	0	0	2.44757	0	0	0	0	2.72454	0	0.19982	2.09844	0
F2S4_160715_006_G01	130	#997F7A	Endo Ctla2a	4	#8D1800	Endothelial	3.38066	0	0	2.42057	0	2.34029	0	0	0	0	2.91913	0	2.59848	1.61413	0	0	3.18875	0	1.1991	0	2.50954	0	0	0	1.99902	0	0	0	0	0.208802	0	2.3845	1.93857	2.69123
F2S4_160715_007_A01	130	#997F7A	Endo Ctla2a	4	#8D1800	Endothelial	2.99576	0	0	2.53585	0	0	0	0	0	0	3.00028	0	2.44898	1.50693	0	0	2.76242	0	0	2.60821	2.70416	0	0	0	1.33754	0	0	0	0	0	0	0	2.26559	1.97494
F2S4_160715_007_E01	130	#997F7A	Endo Ctla2a	4	#8D1800	Endothelial	2.95903	0	0	2.79457	0	0	0	0	0	0	0	0	2.68778	2.04181	0	0	3.28267	0	0	2.73473	2.20008	0	0.951732	0	2.76433	0	0	0	0	0	0	0	1.92102	1.92102
F2S4_160715_007_H01	130	#997F7A	Endo Ctla2a	4	#8D1800	Endothelial	2.97263	0	0	2.36718	0	0	0	0	0	0	2.92746	0	2.63219	0	0	0	3.37551	0	0	0	2.46945	2.65754	0	0	2.60527	0	0	0	0	0	0	0	1.79825	1.74124
F2S4_160715_008_A01	130	#997F7A	Endo Ctla2a	4	#8D1800	Endothelial	2.80154	0	2.40065	2.21739	0	0	0	0	0	0	2.96385	0	2.4822	0	2.49682	2.30017	3.15915	0	0	1.97557	2.4747	0	0.436486	0	1.20442	0	0	0	0	0	0	2.31256	1.90673	0
F2S4_160715_008_B01	130	#997F7A	Endo Ctla2a	4	#8D1800	Endothelial	2.8231	0	0	2.4644	0	0	0	0	0	0	2.48472	0	2.69472	0	0	0	3.61594	0	0	0	2.25447	0	0	0	0	0	0	0	0	2.59311	0	2.38717	0	2.57735
F2S4_160715_008_D01	130	#997F7A	Endo Ctla2a	4	#8D1800	Endothelial	3.38824	0	0	2.54775	0	0	0	0	0	0	0	0	2.75449	2.81412	0	0	3.30817	0	0	0.217013	2.66635	0	0	0	0	0	0	0	0	0	0	1.59378	2.5315	0
F2S4_160715_008_E01	130	#997F7A	Endo Ctla2a	4	#8D1800	Endothelial	3.02839	0	0	2.55487	0	0	0	0	0	0	0.896583	0	2.13091	0	0	0	3.55085	0	0	0	2.81832	0	0	0	1.50467	0	0	0	0	0	0	2.72496	0	1.05391
F2S4_160715_008_F01	130	#997F7A	Endo Ctla2a	4	#8D1800	Endothelial	3.01442	0	0	2.66678	0	0	0	0	0	0	3.2669	0	0	2.83521	0	0	2.80706	0	0	0	2.54751	0	0	0	2.31996	0	0	0	0	0	0.243855	0.243855	0	1.68536
F2S4_160715_008_G01	130	#997F7A	Endo Ctla2a	4	#8D1800	Endothelial	2.94437	0	0	2.32696	0	2.82508	0	0	0	0	2.64713	0	2.59855	0	0	0	3.03919	0	0	0	2.72505	0	0	0	0	0	0	0	0	0	0	0	0	1.57858
F2S4_160715_008_H01	130	#997F7A	Endo Ctla2a	4	#8D1800	Endothelial	2.85169	0	0	2.33391	0	0	0	0	0	0	2.79727	0	2.33391	0	0	0	2.51661	0	0	1.68407	2.31901	0	1.88891	0	0	0	0	0	0	0	1.52835	2.65891	1.28325	2.88383
F2S4_160715_009_A01	130	#997F7A	Endo Ctla2a	4	#8D1800	Endothelial	2.78679	0	0	1.93492	0	0	0	0	0	0	2.81682	0	1.83273	1.7207	0	0	2.48463	0	0	0	2.21333	0	0	0	2.58854	0	0	0	0	0	0	2.71103	1.93492	2.22013
F2S4_160715_009_C01	130	#997F7A	Endo Ctla2a	4	#8D1800	Endothelial	3.29083	0	0	2.2368	2.55368	0	0	0	0	0	2.89674	0	2.03135	0	0	0	2.97639	0.661212	0	0	2.22899	2.2303	0	0	1.8458	0	0	0	0	2.023	0	2.09831	1.73434	0
F2S4_160718_006_B01	130	#997F7A	Endo Ctla2a	4	#8D1800	Endothelial	2.65173	0	0	2.27654	1.13148	0	0	0	0	0	2.44043	0	2.63009	0.188937	0	0	3.58999	0	0	0.420796	2.91247	0	0	0	0	0	0	0	0	0	2.21619	0	2.13926	2.95228
F2S4_160718_006_C01	130	#997F7A	Endo Ctla2a	4	#8D1800	Endothelial	3.24124	0	0	2.47367	0	0	0	0	0	0	3.11899	0	0	0	0	0	2.85015	0	0	0.363539	2.40665	0	0	0	0.692745	0	0	2.2778	0	2.71348	0	2.68624	2.33268	1.81405
F2S4_160718_006_H01	130	#997F7A	Endo Ctla2a	4	#8D1800	Endothelial	3.0488	0	0	2.83277	0	0	0	0	0	0	2.95392	0	2.76237	0	0	0	0	0	2.09842	0	2.85633	0.221527	0	0	2.50026	0	0	0	0	0	0	0	2.21668	2.62003
F2S4_160718_007_A01	130	#997F7A	Endo Ctla2a	4	#8D1800	Endothelial	3.14365	0	0	2.25809	1.84607	0	0	0	0	0	2.73166	2.44724	2.64246	2.11263	2.61458	0	3.13234	1.39198	0	0	2.03977	0	0	0	0	0	0	0	0	0	0	2.82022	0.849199	2.53625
F2S4_160718_007_C01	130	#997F7A	Endo Ctla2a	4	#8D1800	Endothelial	2.83313	0.251906	0.251906	1.9572	0	0	0	0	0	0	0.251906	0	2.31091	2.1189	0	0	3.3693	0	0	0	2.25393	0	0	0	0	0	0	0	0	2.55849	0	0	2.49892	3.29675
F2S4_160718_007_G01	130	#997F7A	Endo Ctla2a	4	#8D1800	Endothelial	0	0	0	2.57501	0	0	0	0	0	0	3.02931	0	2.99986	2.36438	0	0	3.15562	0	2.05085	0	2.75151	0	0	0	2.49303	0	0	0	0	0	0	2.74134	2.14805	0
F2S4_160720_003_A01	130	#997F7A	Endo Ctla2a	4	#8D1800	Endothelial	2.88502	0	0	2.58112	1.93528	0	0	0	0	0	2.69788	1.93528	2.49638	1.90071	0	0	3.3844	0	2.15119	0	2.46401	0	0	0	0	0	0	0	0	0.847772	2.07996	2.28123	2.13576	2.42456
F2S4_160720_003_C01	130	#997F7A	Endo Ctla2a	4	#8D1800	Endothelial	3.30288	0	0	2.40039	0	0	0.978298	0	0	0	2.99496	0	2.78356	2.10954	0	0	2.52428	0	0.232839	2.64565	2.6017	0	0	0	0	0	0	0	0	0	0	0	1.74525	2.90488
F2S4_160824_054_C01	133	#598069	Microglia Siglech	3	#808285	Non-Neuronal	3.04331	0	0	2.20209	0	1.32979	0	0	0	0	2.90906	0	3.14155	0.251256	0	0	3.52618	1.36052	2.06799	1.72827	2.61356	0	2.39817	0	0	0	0	0	0	0	0	0	2.54651	0
F2S4_160901_001_A01	118	#665C47	Astro Aqp4	3	#808285	Non-Neuronal	0	0	0	2.35064	0	0	0	0	2.96852	0	2.85273	0	2.87293	0	0	2.477	2.75501	0	2.80285	0	2.03448	0	2.17855	0	0.908393	0	0	1.65482	0	0	1.01971	0	1.543	0
F2S4_160901_001_B01	118	#665C47	Astro Aqp4	3	#808285	Non-Neuronal	0	0	0	2.65292	0	1.79873	2.13656	0	0.214383	0	2.989	0	2.62949	0	1.29025	0	3.26206	0	0	0	1.88981	0	1.21267	0	0	1.58723	0	0	0	0	0	0	2.05922	1.29025
F2S4_160901_001_D01	129	#807059	SMC Acta2	4	#8D1800	Endothelial	2.79163	0	0	0	0	0	0	0	0	0	2.96645	1.73805	2.61879	1.92456	0	0	0	2.06301	2.58325	0	2.62053	0	1.55488	0	0	0	0	0	0	0.191364	0	2.37451	1.78783	2.85748
F2S4_160901_001_E01	118	#665C47	Astro Aqp4	3	#808285	Non-Neuronal	0.520455	0	0	2.7156	1.17286	1.17286	0	0	2.3442	0	2.65104	0	0	0	0	0	3.06559	0	0	0	2.46979	0.520455	1.92599	0	0	0	0	0	0	2.43058	0	0	1.29044	0.520455
F2S4_160901_001_F01	126	#6B8059	VLMC Spp1 Hs3st6	3	#808285	Non-Neuronal	2.50543	0	0	2.61849	0	2.28971	0	0	0	0	2.81907	0	2.67608	1.46367	0	0	2.5445	1.63819	2.91648	1.05212	2.42054	0	2.30472	0	0	0	2.05175	2.05175	0	0	1.3975	1.14659	2.12228	1.49332
F2S4_160901_001_G01	129	#807059	SMC Acta2	4	#8D1800	Endothelial	2.01138	0	0	2.23486	0	0	0	0	0	0	3.34591	1.81308	2.54587	2.11076	0	0	0	0	2.44474	0	2.86498	0	2.36411	0	0	0	0	0	0	2.52888	0	1.95568	2.02998	2.70838
F2S4_160901_001_H01	118	#665C47	Astro Aqp4	3	#808285	Non-Neuronal	2.49071	0	0	1.87153	0	0	2.52064	0	2.89947	0	3.05323	0	0	0	0	0	2.12093	1.65493	2.31281	0	2.3006	0	2.7721	0	0	0	2.19406	0	1.90359	2.42847	0	2.45855	0	0.659225
F2S4_160901_002_D01	129	#807059	SMC Acta2	4	#8D1800	Endothelial	2.83294	0	0	1.9403	0	0	0	0	0	0	3.25544	0	2.69398	1.98047	0	0	0	1.14462	0.193989	0.193989	2.9202	0	0	0	0	0	0	0	0	0	0	2.66163	1.64699	1.67886
F2S4_160901_002_F01	118	#665C47	Astro Aqp4	3	#808285	Non-Neuronal	1.97571	0	0	2.49243	1.3641	0	0	0	2.69823	0	2.8549	0	2.99133	0.354942	0	0	2.70694	0	2.75051	0	2.03277	0	0	0	0.212766	0	2.29995	0	0	0	0	2.40461	2.03021	2.35299
F2S4_160901_003_A01	118	#665C47	Astro Aqp4	3	#808285	Non-Neuronal	2.46983	0	0	2.25619	0	0	0	0	3.02945	0	2.08208	0.688912	2.91665	1.8005	0	0	3.03881	0	2.99558	1.99753	2.27897	0	1.46973	0	0	0	2.14484	0	0	0	0	0	1.57878	0
F2S4_160901_003_D01	118	#665C47	Astro Aqp4	3	#808285	Non-Neuronal	0	0	0	2.38508	0	0	0	0	2.58404	0	2.15952	0	2.19662	2.26662	0	2.2293	2.87614	0	2.78591	0	2.11507	0	0	0	0.336556	0	0	0	0	2.56509	0.963474	0	1.42733	2.78425
F2S4_160901_003_E01	118	#665C47	Astro Aqp4	3	#808285	Non-Neuronal	0.212316	0	0	2.46015	0	0	0	0	2.41624	0	2.65373	0	2.47963	2.17732	0	0	2.50433	0.99241	2.49741	2.3991	2.17182	0	2.17366	0	0	1.49503	2.41624	0	0	0	0	1.3861	1.58916	2.61696
F2S4_160901_003_F01	118	#665C47	Astro Aqp4	3	#808285	Non-Neuronal	2.05877	0	0	2.26783	0	0	0	0	3.04292	0	2.70759	0	2.4131	2.43425	0	0	3.05812	0	3.01153	0	2.43155	0	0	0	0	0	1.97693	0	0	0	0	2.35143	0	2.52396
F2S4_160901_003_G01	129	#807059	SMC Acta2	4	#8D1800	Endothelial	3.20605	0	0	2.63816	0	0	0	0	0	0	3.05026	0	3.04554	2.01776	0	0	0	1.69507	0	0	2.88124	0	0.190818	0	0	0.190818	0	0	0	0.190818	0	0	1.88102	2.02006
F2S4_160901_004_B01	118	#665C47	Astro Aqp4	3	#808285	Non-Neuronal	1.58347	0	0	2.29845	0	0	0	0	3.14401	0	2.55434	0	2.2477	1.36911	0	0	2.19671	1.2022	2.45717	0	2.30352	0	0.787604	0	1.96147	1.03332	1.34232	0	0	0	0	0	1.2022	0.286254
F2S4_160901_004_C01	118	#665C47	Astro Aqp4	3	#808285	Non-Neuronal	0	0	0	1.93517	0	1.76159	0	0	2.92688	0	0	2.1599	2.53137	1.94727	0	0	1.83952	0	2.34861	0.257869	2.41843	0	0.257869	0	0.418564	0	2.1425	1.95903	0	2.66267	0	0	1.70293	2.38492
F2S4_160901_004_E01	118	#665C47	Astro Aqp4	3	#808285	Non-Neuronal	2.12084	0	0	2.31117	1.95153	0	0	0	1.97395	0	3.00574	1.76627	2.626	2.05559	0	0	3.03518	0.922722	2.48767	1.47645	2.46711	1.79285	1.08116	0	0	0	2.18805	0.864338	0	0.922722	0	1.96906	1.39251	2.29409
F2S4_160901_004_G01	118	#665C47	Astro Aqp4	3	#808285	Non-Neuronal	0	0	0	0	0	0	0	0	2.77565	0	2.32737	0	2.93673	1.88557	2.61289	0	2.69642	0	2.77918	0	2.27772	2.29491	0.651155	0	0	0	0	0	0	0	0.937177	2.37064	0	0
F2S4_160901_005_A01	129	#807059	SMC Acta2	4	#8D1800	Endothelial	2.75796	0	0	2.39438	1.7747	0	0	0	0	0	2.932	0	2.64307	0	0	0	0	0	0	2.00848	2.74559	0	0	0	0	2.02461	0	0	0	0	0	0	1.68077	2.90505
F2S4_160901_005_B01	118	#665C47	Astro Aqp4	3	#808285	Non-Neuronal	2.15869	0	0	2.37705	0	0	0	0	2.24859	0	2.86828	2.62146	2.37842	1.7977	0	0	2.86961	1.50354	2.34129	0	2.44078	0	2.34722	0	0	2.08192	0	2.25772	0	0	0	0	1.61986	0.243833
F2S4_160901_005_C01	118	#665C47	Astro Aqp4	3	#808285	Non-Neuronal	2.09688	0	0	1.80513	0	0	0	0	2.45432	0	2.79603	0	2.4758	0	0	0	2.80305	1.21183	2.4951	0.936683	2.42344	0	1.99416	0	0	0	0	0	1.31245	2.27574	0	0	0	1.88414
F2S4_160901_005_E01	118	#665C47	Astro Aqp4	3	#808285	Non-Neuronal	0	0	0	2.28403	0	0	0	0	3.0454	0	2.97634	0	2.75036	0.245317	0	0	2.67087	0	2.79751	0	2.1013	0	2.22538	0	1.76298	0	2.35649	0	0	0	0	0	0	0
F2S4_160901_005_H01	118	#665C47	Astro Aqp4	3	#808285	Non-Neuronal	2.43405	0	0	2.73286	0	0	0	0	2.02705	0	3.1145	0	2.73759	2.60484	0	1.39255	2.57714	0	2.07506	1.86836	2.8138	0	0.711472	0	0	0	2.03897	0	0	0	0	1.06674	2.2269	2.61868
F2S4_160901_006_A01	118	#665C47	Astro Aqp4	3	#808285	Non-Neuronal	1.78019	0	0	2.23784	0.202167	1.74921	0	0	1.84733	0	2.80863	0	2.64431	1.1287	0	0	2.26385	0	2.16507	0	2.45298	0	2.56016	0	1.44212	0	0	2.19566	0	2.17032	0	0	0	0
F2S4_160901_006_B01	118	#665C47	Astro Aqp4	3	#808285	Non-Neuronal	0	0	0	1.81651	0	0	0	0	2.45873	0	1.23931	0	2.73007	0	0	0	0	0	2.79401	2.31528	2.42072	0	2.70795	0	0	2.19523	2.04253	0	1.29955	0	1.19394	0	0.26964	0.26964
F2S4_160901_006_G01	118	#665C47	Astro Aqp4	3	#808285	Non-Neuronal	0.272108	0	0	2.33829	0	0	0	0	2.64608	0	2.32057	0	2.96832	0	2.58566	0	2.16578	0	2.4781	2.48558	2.48558	0.651723	0.272108	0	2.37966	2.22598	0	1.83301	0	2.42602	1.26536	1.22221	0	0
F2S4_160901_006_H01	129	#807059	SMC Acta2	4	#8D1800	Endothelial	3.07042	0	0	2.69508	0	0	0	0	0	0	3.17293	0	2.74902	2.24901	0	0	0.193145	0	1.7808	0	2.56699	0	0	0	0	0	0	1.066	0	2.36816	2.34018	0	1.97558	2.76309
F2S4_160901_007_A01	118	#665C47	Astro Aqp4	3	#808285	Non-Neuronal	0	0	0	1.62203	0	0	0	0	2.96469	0	2.96368	0	2.91735	1.79465	2.87866	0	2.76247	0	3.01938	0	2.36405	0	1.77939	0	0	0	0	1.28532	0	0	0	2.28322	1.73872	0.186934
F2S4_160901_007_C01	118	#665C47	Astro Aqp4	3	#808285	Non-Neuronal	0	0	0	0	0	1.69923	0	0	3.29409	0	2.64654	0	3.15529	0.273123	1.67581	2.47648	2.44761	0	2.67558	0	2.13856	0	1.80644	0	1.84068	0	0	0	0	2.57182	1.84068	0	0	2.81857
F2S4_160901_007_H01	118	#665C47	Astro Aqp4	3	#808285	Non-Neuronal	0	0	0	2.44846	0	0	0	0	3.15421	0	2.52999	0	2.99494	1.92245	0.665099	0	3.18013	0	2.68599	0	2.35361	0	2.34087	0	0	0	2.26409	1.47711	0	2.61343	0	2.49518	1.88308	0
F2S4_160901_008_B01	129	#807059	SMC Acta2	4	#8D1800	Endothelial	2.87987	0	0	2.40546	0	0	0	0	0	0	2.96016	0	2.9092	0.882184	0	0	0	1.91458	0	0	2.94438	0.190892	0	0	0	0	2.13781	0	0	2.43901	0	0	2.26544	2.9142
F2S4_160901_008_C01	118	#665C47	Astro Aqp4	3	#808285	Non-Neuronal	0	0	0	2.36594	0	0	0	0	3.1724	0	2.87264	0	0	0	2.23953	0	2.38284	0	2.90188	0	2.5982	0	1.94515	0	2.76024	0	0	0	0	0	0	0	0	0
F2S4_160901_008_E01	118	#665C47	Astro Aqp4	3	#808285	Non-Neuronal	0	0	0	2.24967	0	0	0.638455	0	3.25177	0	0.264207	0	3.06162	2.10818	0.545585	0	2.60616	0	2.55458	0	2.57149	0	1.46941	0	0	0	2.36729	0	1.56831	0	0	2.57344	0	2.53487
F2S4_160901_008_G01	118	#665C47	Astro Aqp4	3	#808285	Non-Neuronal	0	0	0	2.32887	0	0	0	0	1.97395	0	3.14932	0	2.55879	0	0	0	3.27864	0	2.66316	0	2.3315	0	1.66554	0	2.71812	0	0	0	0	2.40151	0	2.77547	1.53968	0.97368
F2S4_160901_008_H01	118	#665C47	Astro Aqp4	3	#808285	Non-Neuronal	0	0	0	1.99455	0	0	1.23785	0	2.87817	0	2.55561	0	2.72148	1.8433	0.583586	0	2.41658	1.34734	0	2.21464	1.71006	2.39483	2.25236	0	2.19545	1.36095	0	0	0	0	0	0	0	0.232578
F2S4_160901_009_A01	129	#807059	SMC Acta2	4	#8D1800	Endothelial	2.91675	0	0	2.65031	0	0	0	0	0	0	2.78392	0	2.55423	0	0	0	1.92555	1.2407	0	0	2.15774	0	0.206188	0	0	0	0	0	0	0	0	2.44607	2.11738	2.79379
F2S4_160901_009_B01	129	#807059	SMC Acta2	4	#8D1800	Endothelial	2.58678	0	0	2.34551	0	0	0	0	0	0	3.1281	0	2.2523	0	0	0	2.59775	1.05785	0	0	2.74699	0	0.189961	0	0	0	2.23462	0	0	0	0	0	1.46214	2.78182
F2S4_160901_009_D01	129	#807059	SMC Acta2	4	#8D1800	Endothelial	3.116	0	0	2.46684	0	0	0	0	0	0	2.73452	0	2.80821	1.89083	0	0.976041	2.19413	0	0	0	2.78601	0	1.52691	0	0	0	2.30078	0	0	0	0	2.3562	1.7711	2.25803
F2S4_160901_009_E01	129	#807059	SMC Acta2	4	#8D1800	Endothelial	2.76944	0	0	2.67823	1.55443	0	2.65755	0	0	0	2.38525	0	2.21799	0	0	0	0	0.832988	2.17575	0	2.53074	0	0	0	0	0	0	0	0	0	0	2.36595	1.95278	2.6901
F2S4_160901_009_F01	129	#807059	SMC Acta2	4	#8D1800	Endothelial	2.95508	0	0	2.55702	0.698096	2.28221	0	0	0	0	3.02687	0	2.51079	1.73929	0	0	2.20439	1.77344	2.67515	2.01386	2.43108	0	0	0	0	0	1.94093	0	0	0	2.14036	2.43027	1.96973	2.7309
F2S4_160901_010_D01	129	#807059	SMC Acta2	4	#8D1800	Endothelial	2.77924	0	0	2.47161	0.639593	0	0	0	0	0	1.53921	0	2.86486	1.04467	0	0	0	0	0	0	2.63526	0	0.193174	0	0	0	0	0	0	0	0	0	2.45995	1.68677
F2S4_160901_010_E01	129	#807059	SMC Acta2	4	#8D1800	Endothelial	2.9861	0	0	2.35654	0	1.99069	0	0	0	0	3.08198	0	2.24527	1.31188	0	0	0	1.52517	0	0	2.47347	0	1.60919	0	0	0	2.23389	0	1.60919	0	1.59507	2.72396	1.70813	2.38305
F2S4_160901_010_F01	129	#807059	SMC Acta2	4	#8D1800	Endothelial	3.12102	0	0	2.36268	2.18711	0	0	0	0	0	2.95027	0	2.81356	1.52708	0	2.0034	2.08994	1.33974	1.85587	1.52119	2.84591	0	1.47093	0	0	0	1.92664	0	0	2.44637	0	2.49813	2.20835	1.91241
F2S4_160901_010_G01	118	#665C47	Astro Aqp4	3	#808285	Non-Neuronal	2.43859	0	0	2.40874	0.200917	0	0	0	2.95784	0	2.89721	0	2.74439	0	2.09322	2.43859	2.90745	0	2.36362	0	2.65475	0	0.709074	0	0	0	0	0	0	0	0	0	0	0.200917
F2S4_160901_010_H01	129	#807059	SMC Acta2	4	#8D1800	Endothelial	2.91742	0	0	2.69264	0	0	2.32482	0	0	0	3.21104	0	2.8123	2.41559	0	0	0	1.87108	0	0	2.35767	0	0	0	0	0	0	0	0	2.19677	0	0	1.83747	2.06376
F2S4_160901_011_B01	129	#807059	SMC Acta2	4	#8D1800	Endothelial	2.97513	0	0	2.54496	0	1.33541	0	0	0	0	3.07867	0	2.21207	1.50477	0	0	0	1.52195	2.1706	0	2.53363	0	0	0	0	0	0	0	0	2.36909	0	2.2155	2.32234	2.43969
F2S4_160901_011_D01	129	#807059	SMC Acta2	4	#8D1800	Endothelial	2.94673	0	0	2.16532	0	0	2.22275	0	0	0	3.04418	0	1.70719	1.61134	0	0	0	1.42708	2.0272	0	2.76477	0	0.177422	0	0	0	0	0	0	0	0	1.79279	2.33132	1.34622
F2S4_160901_011_E01	129	#807059	SMC Acta2	4	#8D1800	Endothelial	2.66913	0	0	2.51743	2.55997	1.30223	0	0	0.493776	0	3.13228	0	2.48856	2.05391	0	0	0	0.71888	2.30566	0	2.44461	0	0	0	0	0	0	0	0	2.20928	0	2.51463	1.63695	2.31018
F2S4_160901_011_F01	129	#807059	SMC Acta2	4	#8D1800	Endothelial	3.23957	0	0	2.58149	2.00392	0	0	0	0	0	2.9677	0	2.03905	1.56354	0	0	0.314465	0	0	0	2.75069	0	0	0	0	1.75434	1.30387	0	0	0	0	2.19213	1.95302	1.63862
F2S4_160901_012_A01	129	#807059	SMC Acta2	4	#8D1800	Endothelial	2.64396	0	0	2.43945	0	0	0	0	0	0	1.80901	0	2.339	2.00589	0	0	0	1.35232	2.42709	0	2.54553	0	0.190741	0	0	0.190741	0	0	0	2.39261	0	0.190741	1.87446	1.97149
F2S4_160901_012_C01	124	#664747	VLMC Osr1 Cd74	3	#808285	Non-Neuronal	3.09618	0	0	2.49252	2.15646	0	0	0	0	0	2.95064	1.60307	2.77323	2.56517	0	1.51972	0	0	2.24273	1.9325	2.55962	0	2.31345	0	2.14572	0	0	1.19276	0	2.01083	0	0	2.11572	2.44429
F2S4_160901_012_F01	129	#807059	SMC Acta2	4	#8D1800	Endothelial	3.0411	0	0	2.44588	0	0	0	0	0	0	3.09762	0.180729	2.47311	1.84287	0	0	0	0	1.51165	0.180729	2.72386	0	0.180729	0	0.180729	0	0	0	0	0.406252	2.0004	2.36878	1.90289	2.98433
F2S4_160901_012_G01	129	#807059	SMC Acta2	4	#8D1800	Endothelial	2.86904	0	0	2.55483	0	0	0.176815	0	0	0	2.4407	0	2.35338	0	0	0	0	1.60957	1.86843	0	2.93464	0	2.50116	0	0	0	2.38237	0	0	1.44925	0	0	2.21567	2.69545
F2S4_160901_013_B01	129	#807059	SMC Acta2	4	#8D1800	Endothelial	2.76467	0	0	2.52627	0	0	0	0	0	0	2.8483	0	2.44598	2.39142	0	2.15125	2.22879	1.94029	2.06835	2.04317	2.79355	0	2.34223	0	0	0	0	2.09828	0	0.15823	2.37402	0	1.97399	2.84258
F2S4_160901_013_C01	118	#665C47	Astro Aqp4	3	#808285	Non-Neuronal	1.97796	0	0	2.24018	0	0	0	0	1.13703	0	2.72196	0	2.99369	1.98942	0	0	3.22715	0	2.50344	0	2.6442	0	2.31753	0	0.549241	0	0	0	0	0	0	0	1.86345	0
F2S4_160901_013_G01	129	#807059	SMC Acta2	4	#8D1800	Endothelial	2.98455	0	0	2.26899	0	0	0	0	0	0	2.74699	0	2.66928	1.68001	0	0	0	1.79341	0	0	2.91429	0	1.08486	0	0	0.160265	0	0	0	0	1.22066	0.160265	2.42141	2.23199
F2S4_160901_014_A01	118	#665C47	Astro Aqp4	3	#808285	Non-Neuronal	0	0	0	1.89352	0	0	0	0	2.12038	0	2.69372	0	2.74625	0	0	0	2.62798	0	1.47432	0	2.61299	0	1.14904	0	0.558569	0	0	0	1.40182	0	0	0	0	2.20438
F2S4_160901_014_B01	129	#807059	SMC Acta2	4	#8D1800	Endothelial	2.81551	0	0	2.48239	0	0	0	0	0	0	2.38728	0	2.66614	2.16059	0	0	0	1.66793	2.45552	2.77057	2.50564	0	2.84976	0	0	0	0	0	0	0	0	2.56816	1.65353	2.9554
F2S4_160901_014_C01	129	#807059	SMC Acta2	4	#8D1800	Endothelial	2.65868	0	0	2.1931	0	0	0	0	0	0	2.84334	0	2.22304	0	0	0	0	0	0	0	2.66516	0	2.26135	0	0	0	2.26742	0	0	0	2.74699	0	1.66637	1.14128
F2S4_160901_014_F01	129	#807059	SMC Acta2	4	#8D1800	Endothelial	2.70426	0	0	0	0	0	0	0	0	0	2.79328	0	2.98695	0	0	0	0	0	0	0	2.72601	0	2.26244	0	0	0	2.60836	0	0	0	0	0	2.23515	2.79844
F2S4_160901_014_G01	118	#665C47	Astro Aqp4	3	#808285	Non-Neuronal	0	0	0	1.82296	0	0	0	0	2.25704	0	1.61568	0	2.53988	0	0	0	2.60416	0	0	0	2.29039	0	2.82843	0	0	0	0	0	1.42891	0	0	0	1.27952	2.44045
F2S4_160901_014_H01	118	#665C47	Astro Aqp4	3	#808285	Non-Neuronal	0	0	0	1.60014	0	0	0	0	3.10575	0	3.03203	1.77258	2.38095	2.23581	0	0	2.81497	0	2.64936	0	2.5025	0.829407	0.235263	0	2.80628	0	0	0	0	2.767	0	2.48549	0.873353	0
F2S4_160901_015_A01	118	#665C47	Astro Aqp4	3	#808285	Non-Neuronal	2.24562	0	0	2.25876	0	0	0	0	3.06726	0	1.74619	0	2.83695	1.99265	0	0	2.97457	1.0468	1.11943	0	2.00151	1.63248	0	0	0.371381	0	0	0	0.48109	0	0	0	1.89981	2.41132
F2S4_160901_015_F01	129	#807059	SMC Acta2	4	#8D1800	Endothelial	3.25072	0	0	2.14038	0	0	0	0	0	0	2.63156	2.68507	2.58679	0	0	0	0	0	1.65381	2.55012	2.88324	0	2.32062	0	0	0	0	2.51387	0	2.26732	0	1.69928	1.96363	2.38111
F2S4_160901_016_A01	118	#665C47	Astro Aqp4	3	#808285	Non-Neuronal	0	0	0	2.41266	0	0	0	0	1.28783	0	2.8218	0	2.79781	0.332453	1.97912	0	2.69608	0	3.0953	0	2.32523	0	0.518533	0	0	0	0	2.26989	0	0.332453	0	2.54909	1.05502	2.14304
F2S4_160901_016_C01	129	#807059	SMC Acta2	4	#8D1800	Endothelial	3.25842	0	0	2.07898	0	0	0	0	0	0	0	0	2.91843	2.12283	0	0	0	0	2.76339	0	2.73425	0	0	0	0	0.205978	0	0	0	2.27396	2.25239	2.75141	1.93122	3.01549
F2S4_160901_016_D01	129	#807059	SMC Acta2	4	#8D1800	Endothelial	3.14878	0	0	2.39343	0	0	0	0	0	0	2.79831	0	2.73098	2.52387	0	0	0	1.8654	0	0	2.80127	0	0	0	0	0	0	0	0	0	2.30443	2.42845	2.16132	1.9173
F2S4_160901_016_E01	129	#807059	SMC Acta2	4	#8D1800	Endothelial	2.8291	0	0	2.01475	0	0	0	0	0	0	2.48633	0	2.52057	1.88851	0	0	2.24776	1.36606	2.05354	0	2.49849	2.18398	1.16232	0	0	0	0	0	0	0	0.293707	2.82598	1.06566	2.39859
F2S4_160901_016_G01	129	#807059	SMC Acta2	4	#8D1800	Endothelial	3.31125	0	0	2.54502	1.33592	0	0	0	0	0	3.07493	0	2.83206	1.83281	0	0	0	0.192771	0	0	3.01197	0	0.737975	0	0	0	0	0	0	2.58843	0.192771	2.54294	2.4425	1.4779
F2S4_161110_001_C01	125	#89997A	VLMC Osr1 Mc5r	3	#808285	Non-Neuronal	0	0	0	2.25064	0	0	0	0	0	0	2.59888	2.52077	2.68304	2.68102	0.32578	0	2.94242	0	2.61683	1.92262	0.192747	1.53805	2.80624	0	0	0.972186	0	0	0	2.18296	0	0.192747	0	1.79164
F2S4_161110_001_E01	124	#664747	VLMC Osr1 Cd74	3	#808285	Non-Neuronal	1.84059	0	0	2.60927	0	0	0	0	0	0	2.76266	0	2.48553	2.03415	0	0	0	0	2.58843	0	2.7992	0	1.70091	0	0	0	0	1.8254	0	0.253805	0	0	0.910909	0.41294
F2S4_161110_001_F01	125	#89997A	VLMC Osr1 Mc5r	3	#808285	Non-Neuronal	2.81734	0	0	2.79958	2.14915	2.26371	0	0	0	0	2.88604	0	2.71884	2.41256	0	2.09601	2.54385	0	2.05086	0	2.47792	0	2.27419	0	0	0	1.97802	0	0	0	0	2.33221	1.6161	2.44691
F2S4_161110_001_H01	125	#89997A	VLMC Osr1 Mc5r	3	#808285	Non-Neuronal	2.50063	0	0	2.52807	0	0	0	0	2.30327	0	2.8094	0	2.62986	2.23583	1.10726	0.596635	2.8042	0	2.94835	1.99282	2.40708	0	0.993482	0	0	0	1.90347	2.01318	0	2.04435	0	2.20338	2.10675	2.55244
F2S4_161110_002_A01	125	#89997A	VLMC Osr1 Mc5r	3	#808285	Non-Neuronal	2.97093	0	0	2.65528	0	0	0	0	0	0	2.59146	0	2.50304	2.50086	2.19163	0	2.9667	1.65008	2.9778	1.87527	2.50594	0	2.72811	0	0	0	2.51096	1.37846	0	0	0	2.32727	2.19014	1.6396
F2S4_161110_002_D01	125	#89997A	VLMC Osr1 Mc5r	3	#808285	Non-Neuronal	2.28608	0	0	2.70628	0	0	0	0	2.66947	0	2.80368	2.37906	3.10107	2.26392	0	0	2.84555	0	3.02183	1.92748	2.68267	0	2.23816	0	0	0	0	0	0	0	0	0	2.40282	2.24296
F2S4_161110_002_E01	125	#89997A	VLMC Osr1 Mc5r	3	#808285	Non-Neuronal	0.261152	0	0	2.84215	0	0	0	0	0	0	2.68942	0	2.85683	0	0	0	2.044	0	0	0	2.66456	0	0	0	0	0	0	0	0	2.33816	0	0	2.09866	1.00302
F2S4_161110_002_F01	124	#664747	VLMC Osr1 Cd74	3	#808285	Non-Neuronal	2.99261	0	0	2.66652	0	0	1.99935	0	0	0	3.0388	0	2.95064	2.41909	1.79395	0	1.8599	0.622079	1.84433	2.27823	2.62522	0	2.22718	0	0	0	0	0	0	0	0	2.46794	2.2573	2.76348
F2S4_161110_002_G01	124	#664747	VLMC Osr1 Cd74	3	#808285	Non-Neuronal	3.04178	0	0	2.48904	1.60124	0	1.70363	0	0	0	3.10564	0	2.82757	2.448	0.547472	0	2.13986	1.55485	2.49046	2.1837	2.51462	0	2.33005	0	0	0	0	1.74503	0	1.85595	0.177683	2.57704	2.2588	2.54943
F2S4_161110_002_H01	125	#89997A	VLMC Osr1 Mc5r	3	#808285	Non-Neuronal	0	0	0	0.284427	0	0	0	0	0	0	1.78621	0	0.284427	2.6037	0	0	0	0	0	0	2.42262	0	0	0	0	0	0	0.284427	0	0	0	0	0	3.14167
F2S4_161110_003_C01	126	#6B8059	VLMC Spp1 Hs3st6	3	#808285	Non-Neuronal	2.36239	0	0	2.88092	0	0	0	0	0	0	3.08723	0	2.50774	1.70571	0	0	3.14121	1.79476	2.7139	0	2.75379	1.81295	0	0	0	0	0	0	0	0	0	0	2.5219	0
F2S4_161110_003_D01	124	#664747	VLMC Osr1 Cd74	3	#808285	Non-Neuronal	2.40114	0	0	2.62203	0	0	0	0	0	0	2.66719	0	2.75765	1.8863	0	0	1.37928	0.865138	2.14204	2.22318	2.64441	0.412064	2.04838	0	2.10857	0	1.79191	0	0	2.2413	1.62478	2.62038	2.32691	2.87938
F2S4_161110_003_E01	124	#664747	VLMC Osr1 Cd74	3	#808285	Non-Neuronal	2.96431	0	0	2.45111	0	0	0	0	0	0	3.0349	0	2.92592	2.54977	1.2886	0.264341	2.26801	0	2.15925	2.41206	2.54148	0	2.3402	0	0	0	0	0	0	0	0	2.01028	2.46505	2.47002
F2S4_161117_001_G01	124	#664747	VLMC Osr1 Cd74	3	#808285	Non-Neuronal	2.85428	0	1.37228	2.59896	1.77302	0.459467	1.0893	0	0	0	3.0371	0	2.83001	2.27513	1.23799	1.46549	2.74975	0.990145	2.79741	2.38888	2.5721	0	2.25442	0	0	0	1.37228	0.459467	0	1.73963	1.28281	2.15622	1.95731	2.06337
F2S4_161117_002_H01	124	#664747	VLMC Osr1 Cd74	3	#808285	Non-Neuronal	3.34988	0	0	2.54902	1.6629	0.758792	0	0	0.202025	0	3.0698	0	2.52358	1.68999	0.443561	0.968119	1.95062	0.443561	1.97034	1.55565	2.61807	0	2.10838	0	0	0.658375	0	1.83957	0	1.84328	1.06675	2.26904	2.10637	2.65942
F2S4_161117_004_D01	124	#664747	VLMC Osr1 Cd74	3	#808285	Non-Neuronal	3.00607	0	0	2.63576	0.899389	1.96894	0	0	0	0	3.11979	0	2.66972	2.08216	0.395406	0	2.77211	1.45076	2.74241	2.16606	2.43983	1.77399	2.02111	0	0	0.59889	0	2.23759	0	2.10639	0	2.23132	2.2159	2.54723
F2S4_161117_004_H01	124	#664747	VLMC Osr1 Cd74	3	#808285	Non-Neuronal	2.63252	0	0	2.69028	0.538797	0	0	0	0	0	2.97946	0	2.79034	2.16923	2.0887	0	3.09318	0.42136	2.44773	1.83104	2.68259	1.13667	2.24021	0	0	0	1.58755	0	1.05079	1.70736	2.12353	2.17402	2.35859	2.23299
F2S4_170116_015_A01	118	#665C47	Astro Aqp4	3	#808285	Non-Neuronal	0	0	0	2.52084	0	0	0	0	1.55573	0	0	0	2.63068	0	0.978867	0	3.16551	0	2.73085	1.63117	2.75494	0	0	0	0	0	0	0	0	2.74506	0	0	1.88093	0.267759
F2S4_170125_001_D01	123	#476662	Oligo Synpr	3	#808285	Non-Neuronal	2.29307	0	0	3.01995	0	0	0	0	0.369725	0	2.86855	0	2.99766	1.75888	0	0	0	0.988017	2.45992	0.566495	2.69117	0	0	0	0	0	0	0	0	0	0	0	1.90064	2.50955
F2S4_170130_007_D01	123	#476662	Oligo Synpr	3	#808285	Non-Neuronal	2.36874	0	0	2.80956	1.85899	1.78025	0	0	0	0	2.97698	2.01625	3.15523	2.05413	0	1.71147	0	1.38628	2.86789	1.81094	2.87085	0	0	0	0	1.65468	0	1.19053	0	2.07995	1.39739	3.03147	2.00556	2.50536
F2S4_170201_014_G01	121	#6B998D	Oligo Rassf10	3	#808285	Non-Neuronal	2.5256	0	0	3.0542	0	0	0	0	0	0	3.10027	0	3.03915	1.62364	0	0	0	1.76315	2.51354	0	3.25879	2.1896	0	0	0	0	0	0	0	2.15003	0	2.22744	2.20147	2.11678
F2S4_170201_019_A01	119	#476655	OPC Pdgfra Grm5	3	#808285	Non-Neuronal	2.56681	0	0	2.60637	0	0	0	0	0	0	3.03793	0	3.11932	1.76456	0	0	2.54104	0	0	2.26176	2.87026	0	2.21974	0	0	0	0	0	0	2.23296	1.79621	0	2.36098	2.10887
F2S4_170320_001_A01	118	#665C47	Astro Aqp4	3	#808285	Non-Neuronal	0	0	0	1.82114	0	0	0	0	2.6059	0	3.04101	1.59652	2.90814	0	0	0.629628	3.29462	0	3.0582	2.02279	2.6985	0	2.34669	0	0.837074	0	0	0	0	0	1.20428	0	0	1.77134
F2S4_170320_001_C01	118	#665C47	Astro Aqp4	3	#808285	Non-Neuronal	0.304785	0	0	2.38946	0	0	0	0	0	0	2.99335	0	1.89387	1.96644	0	0	2.71588	1.58707	2.63174	0	2.58724	0	0.704963	0	0	0	2.3439	0	0	0	0	2.69141	0	0
F2S4_170320_001_D01	118	#665C47	Astro Aqp4	3	#808285	Non-Neuronal	0.306355	0	0	2.01048	0	0	0	0	2.13761	0	2.83729	0	2.41878	0	0	0	2.62651	0	2.78216	0	2.53947	0	1.39036	0	0	0	0	0	0	0	0	0	0	0.610023
F2S4_170320_001_E01	129	#807059	SMC Acta2	4	#8D1800	Endothelial	2.86256	0	0	2.63653	1.42441	0	0	0	0	0	3.18316	1.26905	2.0316	1.97906	2.08611	0	0	0	1.76345	0.674781	2.91258	0	2.48759	0	0	1.97906	0	0	2.34022	0	0	2.44986	2.19319	2.86477
F2S4_170320_001_F01	118	#665C47	Astro Aqp4	3	#808285	Non-Neuronal	2.21603	0	0	2.46753	2.56872	0	0	0	2.84554	0	3.17971	0	2.90051	2.10713	0	0	2.59855	0	2.83452	0	2.53498	0	1.90321	0	0.371216	0	0	0	0	0	1.28411	2.74204	0	0
F2S4_170320_001_H01	118	#665C47	Astro Aqp4	3	#808285	Non-Neuronal	0	0	0	2.56714	0.544043	0	0	0	2.29909	0	2.88348	0	2.88206	2.21514	2.00697	0	2.53272	0	3.16013	0	2.76647	0	1.81951	0	0	0	2.35407	0	2.34681	0.21084	0	2.46942	0	1.28157
F2S4_170320_002_B01	118	#665C47	Astro Aqp4	3	#808285	Non-Neuronal	0	0	0	2.71903	0	0	0	0	2.86526	0	0	0	2.63136	2.04936	0	0.291639	2.5842	1.12852	2.66139	2.10501	2.20901	2.66858	0	0	0	0	0	0	0	0	0	0.291639	0	2.68606
F2S4_170320_002_D01	129	#807059	SMC Acta2	4	#8D1800	Endothelial	3.06835	0	0	2.47967	2.50999	0	0	0	0	0	2.96425	0	2.79089	0.907239	0	2.25166	0	2.12031	2.79337	2.18344	2.99381	0	0.201324	0	0	0	0	0	0	2.80876	0	2.65584	2.5827	2.58537
F2S4_170320_002_G01	118	#665C47	Astro Aqp4	3	#808285	Non-Neuronal	0	0	0	1.9466	0	2.68979	0	0	2.18645	0	2.22975	0.853425	2.50417	2.16192	2.21781	0	3.30162	0	2.5599	0	2.64087	0	0	0	0	0	1.28795	0	1.468	1.95407	0	0	0	0.403786
F2S4_170320_003_A01	118	#665C47	Astro Aqp4	3	#808285	Non-Neuronal	0	0	0	1.92627	0	0	0	0	0	0	3.11672	0.588314	2.43496	2.11525	0	0	3.18841	0	2.03482	0	1.9549	2.34527	0	0	0	0	0	0	0	0	2.42412	0	0	2.51565
F2S4_170320_003_B01	129	#807059	SMC Acta2	4	#8D1800	Endothelial	3.03976	0	0	2.55901	0	0	0	0	0	0	3.03052	0	2.84485	2.3366	2.70392	0	0	0	2.60741	1.43893	2.80605	0	2.02198	0	0	1.83004	0	0	0	2.80314	0	0.97956	1.89606	2.2762
F2S4_170320_003_C01	118	#665C47	Astro Aqp4	3	#808285	Non-Neuronal	0	0	0	2.45023	0	0	0	0	1.52773	0	2.81039	0	3.0058	2.39148	0	0	2.82027	1.59829	3.19781	0	2.72083	0	1.15777	0	0	0	0	2.45479	0	0	2.39409	0	0	2.49377
F2S4_170320_003_D01	118	#665C47	Astro Aqp4	3	#808285	Non-Neuronal	1.59514	0	0	0	0	0	0	0	0	0	2.65628	0	2.38165	1.8064	0	0	2.7639	0	3.04461	0	2.25978	0	1.93428	0	0.374799	0	0	0	1.93428	0	1.24163	0	1.53003	1.90567
F2S4_170320_003_E01	129	#807059	SMC Acta2	4	#8D1800	Endothelial	3.16343	0	0	2.67318	0	2.10533	0	0	0	0	2.93059	0	2.53068	2.33544	0	0	0	2.18546	2.45221	0	2.8148	0	2.47222	0	0	0	0	0	0	0	2.77252	0.27657	2.27002	0
F2S4_170320_003_G01	118	#665C47	Astro Aqp4	3	#808285	Non-Neuronal	0	0	0	2.32814	0	0	0	0	0	0	0	0	2.8871	0	0	0	3.02071	0	3.15367	0.95484	2.14852	2.34941	1.70633	0	0	0	2.36637	0	0	0	2.09292	2.56665	0	0
F2S4_170320_004_A01	118	#665C47	Astro Aqp4	3	#808285	Non-Neuronal	1.81758	0	0	2.4014	1.73231	0	0	0	2.18547	0	3.03287	0	2.53871	1.98399	0	0	2.47384	0.325426	2.30732	1.68992	2.43202	0	1.33522	0	2.22038	1.46904	2.07848	0.853431	0	2.13349	0	2.17101	1.64843	2.54011
F2S4_170320_004_B01	129	#807059	SMC Acta2	4	#8D1800	Endothelial	3.15269	0	0	2.52902	0	0	0	0	0	0	3.08987	0	2.66914	0	0	0	0	2.09864	2.4466	0	2.63981	0	0	0	0	0	0	0	0	0	0	0	0.5491	0
F2S4_170320_004_C01	118	#665C47	Astro Aqp4	3	#808285	Non-Neuronal	2.25978	0	0	2.21202	0	0	0	0	0	0	2.88807	0	2.41892	0	0	0	2.55734	0	0	0	2.79659	0	0	0	0	0	0	0	0	0	0	0	2.07692	0
F2S4_170320_004_D01	129	#807059	SMC Acta2	4	#8D1800	Endothelial	3.2109	0	0	2.34062	0	0	2.49359	0	0	0	2.9568	0	2.54023	1.94949	0	0	0	0	0	0	2.34614	0	0	0	0	0	0	0	0	0	0.428447	2.46949	1.51794	3.02349
F2S4_170320_004_H01	118	#665C47	Astro Aqp4	3	#808285	Non-Neuronal	0	0	0	2.62407	0	0	0	0	2.70791	0	0	2.68172	2.36169	2.20266	0	0	3.14374	0	3.34201	0	2.7306	0	1.36922	0	0	0	0	0	0	0	0	1.56437	0	0.262366
F2S4_170320_005_B01	118	#665C47	Astro Aqp4	3	#808285	Non-Neuronal	2.05535	0	0	2.72974	0	0	0	0	0.661413	0	2.71499	0	2.76645	1.77151	0	2.27457	3.04689	0	2.98704	0	2.70527	0	1.51262	0	0	0	0	1.36608	0	0	0	2.28921	2.26112	0
F2S4_170320_005_C01	118	#665C47	Astro Aqp4	3	#808285	Non-Neuronal	0	0	0	2.26986	0	0	0	0	0.303575	0	0	0	2.35723	2.52225	0	0	3.11024	0	2.19256	0	2.65537	0	0	0	0.907533	0	0	0	0	0	0	0	1.93951	0
F2S4_170320_005_E01	129	#807059	SMC Acta2	4	#8D1800	Endothelial	3.32445	0	0	2.10601	0.235422	0	0	0	0	0	2.42102	0	1.88398	1.91165	0	0	0	1.58454	2.31252	1.80348	2.88864	0	0	0	0	0	1.69837	2.21575	0	0	2.10601	0	2.0075	2.77163
F2S4_170320_005_G01	129	#807059	SMC Acta2	4	#8D1800	Endothelial	3.23819	0	0	2.87376	0	0	0	0	0	0	2.83164	0	3.23954	0	0	0	2.54978	1.33533	2.68875	0	2.90784	0	0	0	0	0	0	0	0	0	0	2.48596	2.07071	2.6344
F2S4_170320_005_H01	129	#807059	SMC Acta2	4	#8D1800	Endothelial	2.72717	0	0	2.27856	0	0	0	0	0	0	2.95597	0	2.79173	1.8919	0	0	0	0	2.42758	0	2.82328	0	0	0	0	0	0	0	0	0	1.78986	2.50269	2.31109	2.51934
F2S4_170320_006_B01	129	#807059	SMC Acta2	4	#8D1800	Endothelial	3.37059	0	0	2.60403	0	0	0	0	0	0	3.41512	0	2.94336	2.58324	0	0	0	0	2.48333	1.68721	2.66441	0	1.47549	0	0	0	0	0	0	0	0.782137	2.7898	2.28253	0
F2S4_170320_006_C01	118	#665C47	Astro Aqp4	3	#808285	Non-Neuronal	2.24652	0	0	2.43038	0	2.72982	0	0	2.53311	0	0	0	0.291929	2.1056	0	0	3.17082	0	2.68234	0	2.25355	0	2.27836	0	0	0	0	0	0	0	0	0	0	0.464944
F2S4_170320_006_G01	118	#665C47	Astro Aqp4	3	#808285	Non-Neuronal	2.69102	0	0	2.74414	0	0	0	0	2.72674	0	2.93709	0	2.94973	0.243392	0	0	2.54272	0	0	1.55103	2.56638	0	0.890022	0	0	0	0	0	0	0	0	2.46285	0	0.243392
F2S4_170320_006_H01	129	#807059	SMC Acta2	4	#8D1800	Endothelial	2.86485	0	0	2.62267	0	0	0	0	0	0	2.74806	0	2.75397	0	0	0	0	1.24185	0	0	2.57341	0	2.42558	0	0	1.58311	0	0	0	2.41288	0	0	2.22458	2.68498
F2S4_170320_007_B01	118	#665C47	Astro Aqp4	3	#808285	Non-Neuronal	0	0	0	1.93325	0	0	0	0	1.39555	0	2.59403	0	2.36744	2.33398	0	0	2.89406	0	0	0	2.66445	0	2.38985	0	0	0	0	0	0	0	0	2.62477	2.00245	0.260751
F2S4_170320_007_C01	118	#665C47	Astro Aqp4	3	#808285	Non-Neuronal	2.40074	0	0	2.84422	0	2.61443	0	0	0.947142	0	1.30703	0	3.10835	1.93433	0	0	2.85776	0.586139	2.13791	0	2.66888	0	2.64427	0	0	0	0	2.01327	0	0	0	0	2.00107	0
F2S4_170320_007_D01	126	#6B8059	VLMC Spp1 Hs3st6	3	#808285	Non-Neuronal	0	0	2.89431	2.55735	0	0	0	0	0	0	2.43566	0	2.40327	1.34983	0	0	0.27664	1.03336	2.69728	0	2.4227	0	2.11449	0	0	0	0	0	0	0	0.859464	0	1.56385	2.19311
F2S4_170320_007_E01	118	#665C47	Astro Aqp4	3	#808285	Non-Neuronal	0	0	0	2.52567	2.47149	0	0	0	2.74039	0	2.81622	0	2.31426	0	0	0.287113	2.481	1.82338	3.10781	1.5745	2.40638	0	1.7126	0	2.08587	0	0	0	0	0	0	2.40798	1.88055	2.4236
F2S4_170320_007_F01	118	#665C47	Astro Aqp4	3	#808285	Non-Neuronal	0	0	0	2.65835	0	0	0	0	2.46728	0	2.88786	1.97311	2.75693	0.275469	0	0	0.442695	0	2.45666	1.71908	2.96769	0	2.28798	0	0	0	2.03053	1.20566	0	0	1.4804	0.275469	1.79933	2.74877
F2S4_170320_007_H01	129	#807059	SMC Acta2	4	#8D1800	Endothelial	3.36559	0	0	2.55859	0	0	0	0	0	0	3.08994	0	2.7734	0	0	2.61352	0	2.25876	0	0	2.98671	0	0	0	0	0	0	0	0	0	0	0	2.59512	0.249069
F2S4_170320_008_C01	124	#664747	VLMC Osr1 Cd74	3	#808285	Non-Neuronal	2.97473	0	0	1.65308	0	0	0	0	0	0	2.56574	0	2.81545	2.59155	2.17954	0	2.38161	1.0489	1.0489	2.19319	2.22207	0	1.69265	0	0	0	0	0	0	0	0	2.33141	1.10725	0
F2S4_170320_008_F01	124	#664747	VLMC Osr1 Cd74	3	#808285	Non-Neuronal	3.38227	0	0	2.43105	2.40811	0	0	0	0	0	3.04297	0	2.93655	2.37482	2.40999	0	2.74014	1.17274	2.0538	0	2.55738	0	0.778042	0	0	0	0	0	0	0	0	2.09832	2.38884	2.3287
F2S4_170320_008_H01	129	#807059	SMC Acta2	4	#8D1800	Endothelial	3.45172	0	0	2.42542	0	0	0	0	0	0	2.96697	0	2.77717	1.99732	0	0	0	1.49628	0	0	2.91686	0	0	0	0	0	0	0	0	0	0	0	1.84882	2.80332
F2S4_170323_001_A01	133	#598069	Microglia Siglech	3	#808285	Non-Neuronal	3.4935	0	0	2.52752	0	0	0	0	0	0	0	0	2.53731	0	0	0	3.64308	0	2.50402	1.69456	0	0	1.71483	0	0	0	2.46268	0	0	0	0	0	2.15872	0
F2S4_170323_001_B01	118	#665C47	Astro Aqp4	3	#808285	Non-Neuronal	0	0	0	1.78548	0	0	0	0	2.85944	0	2.8519	0	2.84423	0	0	1.98028	2.96724	0	2.82109	1.07035	0	0	0	0	0	1.9255	2.15399	0	0	0	0.643194	2.30171	1.7342	1.86949
F2S4_170323_001_C01	118	#665C47	Astro Aqp4	3	#808285	Non-Neuronal	0	0	0	0	0	0	0	0	2.71086	0	0	0	2.42354	2.20526	0	2.48726	2.34349	0	0	0	2.22455	0	2.35061	0	2.40681	0	0	2.07377	0	0	0	0	0	0
F2S4_170323_001_D01	118	#665C47	Astro Aqp4	3	#808285	Non-Neuronal	2.2272	0	0	2.24842	0	0	0	0	2.8597	0	3.14332	0	2.58203	2.50632	0	0	2.79822	0	2.75774	0	1.12556	0	2.59871	0	1.96693	0	0	0	1.20284	0	0	0	1.8905	0
F2S4_170323_001_E01	118	#665C47	Astro Aqp4	3	#808285	Non-Neuronal	0.382162	0	0	2.74574	2.66363	0	0	0	2.83315	0	0.231827	0	2.88483	2.56228	0	0	2.97079	0	2.23479	0	2.11659	0	0	0	0	0	0	0	0	0	0	0	0	1.17921
F2S4_170323_001_F01	118	#665C47	Astro Aqp4	3	#808285	Non-Neuronal	2.45028	0	0	0.187346	0	0	0	0	2.76244	0	2.83838	0	2.82841	1.84535	0	0	2.76926	0.679034	2.97811	0	2.38881	0	0	0	0	0	1.95162	1.43822	0	2.55723	0	2.47997	0	2.24225
F2S4_170323_001_H01	119	#476655	OPC Pdgfra Grm5	3	#808285	Non-Neuronal	0	0	0	2.2931	2.88827	0	0	0	0	0	2.49621	0	1.7773	0	0	0	0	0	2.46449	2.05722	2.52836	0	2.45947	0	0	0	0	0	2.76176	0	0	0	0	0
F2S4_170323_002_B01	118	#665C47	Astro Aqp4	3	#808285	Non-Neuronal	0	0	0	0	0	0	0	0	2.83244	0	2.98648	0	2.81255	0	2.67492	0	2.72495	0	2.26683	0	2.68728	0	0	0	0	0	0	0	0	0	0	2.35022	2.2125	1.27905
F2S4_170323_002_C01	118	#665C47	Astro Aqp4	3	#808285	Non-Neuronal	0	0	0	2.28672	0.665166	0	0	0	1.70164	0	2.1655	2.25814	2.96927	2.23585	0	2.1308	3.01342	0	2.13313	0	2.61351	2.33005	0	0	0	0	0	0	2.22285	0	1.83986	1.94988	1.59981	2.22191
F2S4_170323_002_D01	118	#665C47	Astro Aqp4	3	#808285	Non-Neuronal	0	0	0	0	0	0	0	0	3.08966	0	0.268432	0	2.91541	0	0	0	2.66469	0	2.63987	0	0	0	2.37802	0	0	0	0	0	0	0	0	0	0	0
F2S4_170323_002_E01	118	#665C47	Astro Aqp4	3	#808285	Non-Neuronal	2.28384	0	0	2.27012	2.86195	0	0	0	2.66329	0	0	0	2.88555	2.28249	0	0	2.99065	0	1.72909	0	2.45918	0	1.32877	0	2.76971	0	1.1859	0	0	0	0	0	1.71431	2.06795
F2S4_170323_002_F01	123	#476662	Oligo Synpr	3	#808285	Non-Neuronal	2.27305	0	0	2.96398	0	1.09006	0	0	0	0	2.88738	0	2.81951	2.20848	0	0	0	1.44479	2.38747	0	2.39659	0	0	0	0	0	0	0	0	0	0.288255	2.24952	0.931265	2.35978
F2S4_170323_002_G01	122	#6C8581	Oligo Serpinb1a	3	#808285	Non-Neuronal	0	0	0	2.84336	0	0	0	0	0	0	3.02823	0	3.17862	1.479	0	0	0.199371	0	0	0	2.61829	0	0	0	0	0.79542	0	0	0	2.71462	0	0.199371	1.86476	2.92062
F2S4_170323_003_A01	130	#997F7A	Endo Ctla2a	4	#8D1800	Endothelial	3.27159	0	0	2.06491	0	0	0	0	0	0	2.59268	0	2.87847	0	0	0	3.45756	0	2.31115	2.01447	2.22968	0	0	0	2.06092	0	0	0	0	2.56284	0	2.38828	2.15101	0
F2S4_170323_003_B01	133	#598069	Microglia Siglech	3	#808285	Non-Neuronal	3.13374	0	0	2.68798	0	0	0	0	0	0	2.82795	0	2.61721	0	0	0	2.68798	0	0	0	2.27379	0	2.52525	0	0	0	0	0	0	0	1.59203	2.91164	0	0
F2S4_170323_003_C01	119	#476655	OPC Pdgfra Grm5	3	#808285	Non-Neuronal	0	0	0	0	0	0	0	0	0	0	3.22657	1.5989	3.00631	2.46116	0	0	0	0	2.72195	0	0	0	1.27695	0	2.11882	1.50276	0	0	0	0	0	0	2.18461	0
F2S4_170323_003_D01	118	#665C47	Astro Aqp4	3	#808285	Non-Neuronal	0.461859	0	0	2.10741	0	0	0	0	2.4968	0	2.57502	0	2.80667	0	0	0	2.94619	0	2.9281	0	2.696	0	0	0	0	0	0	0	0	0	0	0	0	0
F2S4_170323_003_E01	119	#476655	OPC Pdgfra Grm5	3	#808285	Non-Neuronal	0	0	0	2.41807	0.234681	0	0	0	1.24261	0	2.84181	0	2.85764	2.17627	1.16484	0	0.234681	1.96385	2.56321	0	2.48308	0	2.4228	0	0	0	0	0	1.63631	0	0	0	2.08676	2.59281
F2S4_170323_003_F01	122	#6C8581	Oligo Serpinb1a	3	#808285	Non-Neuronal	0	0	0	2.63645	0	0	0	0	0	0	0	0	2.88133	1.97186	0	0	0	0	0.582858	0	2.58853	0	0	0	0	0	2.45286	0	0	0	0.921696	2.40341	1.69072	0
F2S4_170323_003_G01	133	#598069	Microglia Siglech	3	#808285	Non-Neuronal	2.96346	0	0	0	0	0	0	0	0	0	2.67829	0	2.96408	0	0	0	2.79234	0	2.87962	0	0	0	0	0	0	0	0	0	0	0	0	0	1.73011	0
F2S4_170323_003_H01	118	#665C47	Astro Aqp4	3	#808285	Non-Neuronal	0.248309	0	0	2.13103	0	0	0	0	2.96583	0	0.248309	0	3.11881	1.82325	0	2.40616	2.67066	1.35408	2.88215	0	0	0	1.94148	0	2.9256	0	2.61909	0	0	0	0	0	1.63774	0
F2S4_170323_010_A01	119	#476655	OPC Pdgfra Grm5	3	#808285	Non-Neuronal	2.50428	0	0	2.40513	2.25532	2.34739	0	0	0	0	3.25656	0	2.84631	1.75023	0	0	0.168009	1.37424	2.1741	2.02473	2.18362	0	2.36367	0	0	0	0	0	0	0	0	2.26322	2.22094	2.59077
F2S4_170323_010_C01	118	#665C47	Astro Aqp4	3	#808285	Non-Neuronal	0	0	0	2.60898	0	0	1.21603	0	3.3117	0	0	0	2.90782	2.09267	0	0	3.02804	0	2.65438	2.35948	2.51234	2.71725	0	0	0	0	1.43547	0	0	0	0	0	1.75871	2.35948
F2S4_170323_010_D01	122	#6C8581	Oligo Serpinb1a	3	#808285	Non-Neuronal	2.59402	0	0	2.69371	0	0	0	0	0	0	2.85482	0	3.07145	2.53868	0	0.891641	0.194788	0.85889	2.54922	2.20115	2.48742	0	0	0	0	0	0	0	0	0	0	0	1.63229	2.92941
F2S4_170323_010_E01	133	#598069	Microglia Siglech	3	#808285	Non-Neuronal	2.96349	0	0	2.61165	0	0	0	0	0	0	3.22059	0	2.37516	0	0	0	3.83776	0	0	0	2.10883	0	2.33633	0	0	0	0	0	0	0	0	0	2.34865	2.34662
F2S4_170323_010_F01	118	#665C47	Astro Aqp4	3	#808285	Non-Neuronal	0	0	0	2.11457	0	0	0	0	2.97046	0	2.61288	0	2.66833	2.54266	0	0	2.67764	0	3.08524	1.26703	1.78928	0	0.223458	0	0	2.11904	0	0	0	0	0	1.7748	0	0
F2S4_170323_010_G01	119	#476655	OPC Pdgfra Grm5	3	#808285	Non-Neuronal	0	0	0	0	0	0	0	0	0	0	2.66073	0	2.63894	0	0	2.08794	0	0	2.91991	2.47542	2.52781	0.59012	0	0	0	0	0	0	0	0	1.47589	0.664116	1.22797	0
F2S4_170323_011_A01	119	#476655	OPC Pdgfra Grm5	3	#808285	Non-Neuronal	2.39828	0	0	0	0.218549	0	0	0	0	0	2.58538	0	3.04517	0.218549	0	0	0	0	2.92537	0	2.55322	0	2.58759	0	0	0	0	1.8783	0	0	0	2.50716	0	2.75339
F2S4_170323_011_B01	118	#665C47	Astro Aqp4	3	#808285	Non-Neuronal	2.28599	0	0	2.59092	0	0	0	0	2.8878	0	2.76449	0	2.70565	0.215013	0	2.04356	2.77815	0	1.56674	0	1.98143	1.95756	1.51043	0	0	0	0	0	0	2.44266	0	2.81588	0	0
F2S4_170323_011_C01	118	#665C47	Astro Aqp4	3	#808285	Non-Neuronal	0	0	0	1.88565	0	0	0	0	3.0131	0	0.231045	0	2.86873	1.95179	2.57847	0	2.96362	0	0.381055	1.88961	2.21469	0	0	0	0.492341	0	0	1.798	0	2.39729	0	2.49238	1.19725	1.817
F2S4_170323_011_D01	133	#598069	Microglia Siglech	3	#808285	Non-Neuronal	2.74784	0	0	2.12234	0	0	0	0	0	0	2.87018	0	2.48415	0	0	0	3.51256	1.33716	0	0	0	2.77889	2.2657	0	0	0	2.55549	0	0	2.63927	0	0	2.04083	0.216948
F2S4_170323_011_E01	118	#665C47	Astro Aqp4	3	#808285	Non-Neuronal	0.452153	0	0	2.84872	0	0	0	0	1.00698	0	3.16568	0	2.13544	1.539	0	0	2.98308	1.15949	2.65492	0	2.32702	0	0	0	0	0	2.48194	0	0	0	0.668832	0	1.92463	1.58273
F2S4_170323_011_F01	130	#997F7A	Endo Ctla2a	4	#8D1800	Endothelial	3.12949	0	0	3.16283	0	0	0	0	0	0	2.97463	0	2.79065	2.58665	0.184593	0	2.93907	1.52256	0.184593	1.02258	2.59316	0	0	0	2.27408	0.184593	0	0	0	0	0	2.38094	0	1.90837
F2S4_170323_011_G01	119	#476655	OPC Pdgfra Grm5	3	#808285	Non-Neuronal	0	0	2.34522	2.06311	0	0	0	0	0.191401	0	2.88476	0	2.75907	2.09902	0	0	0	1.06155	0	0.576239	2.2231	0	2.37966	0	0	0	0	0	0	0	0	2.44563	2.46749	2.6235
F2S4_170323_012_A01	118	#665C47	Astro Aqp4	3	#808285	Non-Neuronal	0	0	0	1.94877	0	0	0	0	2.49865	0	1.25228	0	2.89929	0	0	0	3.21693	0	3.0678	0.19919	2.07177	0	0	0	0	0	0	0	0	1.90387	1.50301	2.44677	1.99461	0
F2S4_170323_012_C01	118	#665C47	Astro Aqp4	3	#808285	Non-Neuronal	0.401937	0	0	2.20457	0	0	0	0	1.93598	0	2.67571	0	3.04106	2.36359	1.23026	0	0	0	2.41102	0	2.34903	0	1.69	0	0	0	0	0	0	0	0	0	1.6967	2.62546
F2S4_170323_012_D01	119	#476655	OPC Pdgfra Grm5	3	#808285	Non-Neuronal	0.245738	0	0	2.3963	0	0	0	0	0	0	2.58404	2.04364	3.22951	0	0	0	0	0	0	0	2.72352	0	2.62509	0	0	0	0	0	0	0	1.36298	0	0	1.70294
F2S4_170323_012_E01	118	#665C47	Astro Aqp4	3	#808285	Non-Neuronal	0.224583	0	0	2.46061	0	2.00529	0	0	1.60506	0	2.75108	1.2852	2.81904	0	0	2.178	2.91582	0	1.88177	0	2.42673	0	1.45886	0	2.17604	0	2.37784	0	0	0	0	0	0	0.224583
F2S4_170323_012_F01	133	#598069	Microglia Siglech	3	#808285	Non-Neuronal	3.15193	0	0	2.76243	0	0	0	0	0	0	0.692821	0	0.251867	0.251867	0	0	3.33508	0	0	0	0.410251	0	2.0069	0	0	0	0	1.62189	2.52304	0	0	0	2.50528	2.76654
F2S4_170323_012_G01	118	#665C47	Astro Aqp4	3	#808285	Non-Neuronal	0.22974	0	0	0.22974	0	0	0	0	3.47435	0	2.72329	0	2.99671	1.8185	0	0	2.73904	0	2.59035	0	2.03212	0	0	0	0	2.34366	0	0	0	0	0	0	0	0
F2S4_170323_012_H01	118	#665C47	Astro Aqp4	3	#808285	Non-Neuronal	0	0	0	2.30794	0	0	0	0	0.633874	0	0	0	2.45507	1.96156	0	0	0.220318	1.78628	2.49449	2.51249	2.74098	0	0	0	2.61631	0	0	0	0	0	0	0	1.81357	0
F2S4_170323_013_B01	119	#476655	OPC Pdgfra Grm5	3	#808285	Non-Neuronal	0	0	0	0	0	0	0	0	0	0	0	0	3.4248	0	0	0	0	0	0	0	2.36675	2.92534	1.9984	0	0	0	0	0	0	0	1.14607	2.56676	0	2.3039
F2S4_170323_013_C01	133	#598069	Microglia Siglech	3	#808285	Non-Neuronal	2.56542	0	0	0	0	0	0	0	0	0	0.39574	0	0.92618	0	2.5818	0	3.14976	0	0	0	0	0	0.39574	0	0	0	0	0	0	0	0	1.64477	2.55833	2.39688
F2S4_170323_013_D01	133	#598069	Microglia Siglech	3	#808285	Non-Neuronal	3.32754	0	0	2.80242	0	0	0	0	0	0	3.16164	0	3.25421	0	0	0	3.55655	0	0	0	2.48796	0	1.27381	0	0	0	0	0	0	0	0	0	2.66438	0
F2S4_170323_013_E01	133	#598069	Microglia Siglech	3	#808285	Non-Neuronal	3.17998	0	0	0	3.37496	0	0	0	0	0	3.03362	0	0.341003	0	0	0	3.25809	0	0	0	0	0	0.52964	0	0	0	0	2.3943	0	0	0	0.341003	2.70275	0
F2S4_170323_013_F01	133	#598069	Microglia Siglech	3	#808285	Non-Neuronal	3.24406	0	0	0.290308	0	0	0	0	0	0	0.462766	0	2.78382	0	0	0	3.02245	0	0	0	0	0	2.5638	0	0	0	0	0	0	0	0	0	2.51364	0
F2S4_170323_013_H01	118	#665C47	Astro Aqp4	3	#808285	Non-Neuronal	0	0	0	2.12138	0	0	0	0	2.88843	0	1.43282	0	2.64637	2.6167	0	0	2.76501	0	3.04604	0	1.79706	0	0	0	1.79706	0	0	0	0	0	0	0	1.85349	0.527876
F2S4_170323_014_A01	118	#665C47	Astro Aqp4	3	#808285	Non-Neuronal	0	0	0	2.36108	0	0	0	0	2.99126	0	2.50386	0	2.72083	0	0.206321	0	3.00112	0	2.57754	0	2.00317	0	2.63626	0	0	0	1.97613	0	0	1.45279	0	0	0	0
F2S4_170323_014_B01	119	#476655	OPC Pdgfra Grm5	3	#808285	Non-Neuronal	0	0	0	0	2.40778	2.49854	0	0	0	0	2.82282	0	2.48022	2.52208	0	0	0	0	2.73231	2.39113	2.61006	0	2.21191	0	1.36317	0	0	1.40382	0	0	0	0.194811	2.47449	2.34811
F2S4_170323_014_C01	119	#476655	OPC Pdgfra Grm5	3	#808285	Non-Neuronal	1.54521	0	0	1.89156	0	0	0	0	2.29757	0	2.78072	0	3.0112	0	0	0	0	0	2.75121	0	0	0	2.76206	0	0	0	0	0	0	0	0	2.81735	0	2.61373
F2S4_170323_014_D01	133	#598069	Microglia Siglech	3	#808285	Non-Neuronal	3.57	0	0.312921	2.31338	0	0	0	0	0	0	3.10154	0	2.56247	0	0	0	3.1739	0	2.09882	0	2.01887	0	0	0	0	0	0	0	0	0	0	0	0.312921	2.45474
F2S4_170323_014_E01	122	#6C8581	Oligo Serpinb1a	3	#808285	Non-Neuronal	2.30706	0	0	3.12712	0	0	0	0	0	0	2.63172	0	2.98876	1.73862	0	0	0.298149	0.597732	2.47996	0	2.30494	0	0	0	0	0	0	0	0	2.19154	0	2.91487	1.47871	0.298149
F2S4_170323_014_F01	118	#665C47	Astro Aqp4	3	#808285	Non-Neuronal	2.67787	0	0	2.25192	0	0	0	0	2.97247	0	2.51801	0	2.85253	0	0	0	2.12528	0	2.93293	0	1.71905	0	0.209212	0	0.349809	0	0	0	1.52892	0	0	0	0	0
F2S4_170323_014_H01	133	#598069	Microglia Siglech	3	#808285	Non-Neuronal	3.45669	0	0	0	2.59761	0.263203	0	0	0	0	0.636757	0	0	0	0	0	2.67904	0	0	2.78655	0.263203	0	0.263203	0	0	0	0	0	0	0	0	0	0	2.07668
F2S4_170323_015_B01	133	#598069	Microglia Siglech	3	#808285	Non-Neuronal	2.7204	0	0	2.41365	0	0	0	0	0	0	0	0	2.80687	2.15202	0	0	3.0679	0	0	0	0	0	1.96157	0	0	0	0	2.29102	0	0	2.756	2.91905	1.81134	3.02004
F2S4_170323_015_C01	118	#665C47	Astro Aqp4	3	#808285	Non-Neuronal	2.40845	0	0	0	0	0	0	0	2.94845	0	0.217702	0.470187	2.58028	0	0	0	3.0161	0	2.60483	0	2.23922	2.1409	2.14294	0	0	2.09572	0	0	1.36414	0	0.217702	0	1.51707	2.16475
F2S4_170323_015_D01	133	#598069	Microglia Siglech	3	#808285	Non-Neuronal	3.51241	0	0	2.83506	2.5309	0	0	0	0	0	2.70657	0	2.60833	0	0	0	3.01302	0	0	0	1.88339	0	0	0	0	2.42606	0	0	1.8871	0	1.89078	0	2.63883	0
F2S4_170323_015_E01	118	#665C47	Astro Aqp4	3	#808285	Non-Neuronal	2.50375	0	0	1.93848	0	0	0	0	3.31057	0	0.204106	0	2.8102	2.30143	0	0	3.19983	0	2.43961	0	2.64005	0	0	0	0	0	0	0	0	0	0	2.44619	1.4281	2.16846
F2S4_170323_015_F01	118	#665C47	Astro Aqp4	3	#808285	Non-Neuronal	0	0	0.207366	2.52524	0	0	0	0	0	0	2.71547	0	2.71802	2.50245	0	0	2.44441	0	2.41066	1.5549	2.1717	1.31353	0	0	0	0	0	0	0	0	1.27296	2.49656	2.37067	0
F2S4_170323_015_G01	128	#665547	Peri Kcnj8	4	#8D1800	Endothelial	3.03067	0	0	1.02899	2.94791	0	0	0	0	0	3.30818	0	2.82268	3.09991	0	0	0.228442	0	1.77189	3.11169	2.95796	0	2.36583	0	0	0	0	0	0	0	0	0	0	0
F2S4_170323_015_H01	133	#598069	Microglia Siglech	3	#808285	Non-Neuronal	3.25182	0	0	2.44225	0	0	0	0	0	0	1.56048	0	2.58465	0	0	0	2.9923	0	0	0	0.228684	0	2.9805	0	0	0	0	0	0	0	0	0	2.64863	0
F2S4_170323_016_A01	118	#665C47	Astro Aqp4	3	#808285	Non-Neuronal	0	0	0	0	0	0	0	0	0	0	2.91824	0	2.95778	2.23369	0	0	3.05571	0	3.11161	0	2.58056	0	0	0	0	0	0	0	0	0	0	0	0	0
F2S4_170323_016_B01	118	#665C47	Astro Aqp4	3	#808285	Non-Neuronal	0.945145	0	0	2.80228	0	0	0	0	1.93534	0	3.24546	0	2.79717	3.19534	0	0	0	0	2.37397	2.55869	2.78454	0	2.8934	0	2.76516	0	0	0	0	0	0	0	0	0
F2S4_170323_016_D01	119	#476655	OPC Pdgfra Grm5	3	#808285	Non-Neuronal	0	0	0	2.32418	2.58338	0	0	0	0	0	2.11838	0	2.72476	0	2.99356	0	0	0	2.8186	0	2.63142	0	2.30431	0	0	0	0	0	0	0	0	0	2.16458	2.39153
F2S4_170323_016_F01	133	#598069	Microglia Siglech	3	#808285	Non-Neuronal	0	0	0	0	2.62634	0	0	0	0	0	0	0	0	0	0	0	0	2.11116	2.83487	2.77941	0	0	2.52946	0	0	0	0	0	0	0	0	0	2.29486	2.60431
F2S4_170323_016_G01	133	#598069	Microglia Siglech	3	#808285	Non-Neuronal	2.51243	0	0	2.38375	0	0	0	0	0	0	2.73922	0	2.88877	0	0	0	3.57969	0	2.7144	2.4185	0	0	0.952773	0	0	0	0	0	0	0	0	0	2.39782	1.03522
F2S4_170323_016_H01	133	#598069	Microglia Siglech	3	#808285	Non-Neuronal	0	0	0	2.38268	0	0	0	0	0	0	2.89548	0	2.58947	0.233287	0	0	3.27919	0	0	0	0	0	1.3204	0	0	0	0	0	0	0	0	0	2.13618	1.9433
F2S4_170323_017_B01	118	#665C47	Astro Aqp4	3	#808285	Non-Neuronal	2.23296	0	0	2.41276	0	0	0	0	3.23717	0	2.98114	0	2.93605	2.23296	0	0	2.09732	0	0	0	2.39425	0	0.805935	0	1.82676	0	2.36492	0	0	0	0	0	0.889048	0
F2S4_170323_017_C01	119	#476655	OPC Pdgfra Grm5	3	#808285	Non-Neuronal	2.69534	0	0	0	0	0	0	0	0	0	3.07156	0	2.96889	2.00619	0	0	0	0	2.7852	1.28002	2.40058	0	1.56285	0	0	0	0	0	0	0	0	2.6566	1.86798	1.92398
F2S4_170323_017_D01	133	#598069	Microglia Siglech	3	#808285	Non-Neuronal	3.10997	0	0	2.68635	0	2.19758	0	0	0	0	3.12325	0	0	0	0	0	2.9551	0	2.7365	0	2.20071	0	2.72543	0	0	0	0	0	0	0	0	2.92193	2.01653	2.8376
F2S4_170323_017_E01	128	#665547	Peri Kcnj8	4	#8D1800	Endothelial	2.28291	0	0	2.71467	0	0	0	0	0	0	1.39876	0	2.88852	0	0	0	0	0	2.81154	0	2.19567	0	3.26615	0	0	0	0	0	0	0	0	2.14807	0	0
F2S4_170323_017_F01	119	#476655	OPC Pdgfra Grm5	3	#808285	Non-Neuronal	0	0	0	0	0	0	0	0	0	0	3.23851	0	2.80705	2.53247	0	0	0.281801	0	2.64648	0	2.68171	0	3.16098	0	0	0	0	0	0	0	1.74666	0	2.48711	2.46998
F2S4_170323_017_G01	133	#598069	Microglia Siglech	3	#808285	Non-Neuronal	1.69024	0	0	0	0	0	0	0	0	0	2.77254	0	2.53642	0	0	0	3.61908	0	2.67595	0	0	0	0	0	0	0	0	0	0	2.68081	0	2.42266	1.87455	1.8472
F2S4_170323_017_H01	133	#598069	Microglia Siglech	3	#808285	Non-Neuronal	2.70261	0	0	1.95783	0	2.45002	0	0	0	0	3.06734	0	2.08157	0	0	0	3.72333	1.42971	0	0	0	0	0.860401	0	0	0	2.08157	0	0	0	0	0	0.860401	2.31186
F2S4_170323_018_A01	133	#598069	Microglia Siglech	3	#808285	Non-Neuronal	2.69769	0	0	0	0	0	0	0	0	0	0.117845	0	0	0	0	0	3.46572	1.73734	2.91427	0	0.117845	0	1.05258	0	0	0	0	0	0	0	0	0	2.84504	0
F2S4_170323_018_B01	118	#665C47	Astro Aqp4	3	#808285	Non-Neuronal	0	0	0	0	0	0	0	0	2.69718	0	2.03458	0	3.17506	2.24734	0	0	2.57004	0	2.3034	0	0	0	1.45704	0	0	0	0	0.840347	0	0	0	0	2.18107	0
F2S4_170323_018_D01	118	#665C47	Astro Aqp4	3	#808285	Non-Neuronal	0	0	0	2.60574	0	0.308448	0	0	2.94309	0	2.73896	0	3.32857	2.12854	0	0	2.76519	0	2.2626	0	2.25015	0	0	0	2.56244	0	0	0	0	0	0	0	0	2.24507
F2S4_170323_018_F01	133	#598069	Microglia Siglech	3	#808285	Non-Neuronal	3.05381	0	0	2.33383	2.46978	2.3514	0	0	0	0	2.42709	0	2.24453	0	0	0	3.41734	0	2.3633	0	1.67914	0	2.89409	0	0	0	0	0	0	0	0	2.51282	2.07404	1.7568
F2S4_170323_018_G01	128	#665547	Peri Kcnj8	4	#8D1800	Endothelial	2.76342	0	0	0	0	0	0	0	0	0	0	0	2.80322	1.53498	0	0	0.344394	0	0.205476	0	2.41689	0	0	0	0	0	0	0	0	0	1.92681	0	0	0
F2S4_170323_018_H01	133	#598069	Microglia Siglech	3	#808285	Non-Neuronal	0	0	0	0	0	0	0	0	0	0	2.88558	0	2.85818	0	0	0	3.44438	0	0	0	0	0	1.05845	0	0	0	2.74887	0	0	0	1.75678	0	0	3.15891
F2S4_170323_025_A01	122	#6C8581	Oligo Serpinb1a	3	#808285	Non-Neuronal	2.02036	0	0	2.62357	0	0	0	0	0	0	2.27433	0	2.95198	2.29159	0	0	0	0	2.18103	0	2.66071	0	0	0	0	1.86061	0	0	0	0	0	0	1.356	2.53143
F2S4_170323_025_B01	119	#476655	OPC Pdgfra Grm5	3	#808285	Non-Neuronal	2.67546	0	0	2.29382	0	0	0	0	0	0	2.67206	0	1.05459	2.01559	0	0	0	0	2.6176	0	2.90513	0	2.61293	0	1.5153	2.346	0	0	0	0	0	0	2.48152	0.240181
F2S4_170323_025_C01	118	#665C47	Astro Aqp4	3	#808285	Non-Neuronal	0	0	0	2.34524	2.84976	0	0	0	2.91375	0	1.10497	0	2.99601	2.44732	0	0	2.68313	0	2.55088	0	2.13868	0	0	0	2.52232	0	0	2.52123	0	0	0	0	2.19328	0
F2S4_170323_025_D01	118	#665C47	Astro Aqp4	3	#808285	Non-Neuronal	2.42626	0	0	2.31955	0	0	0	0	2.98586	0	2.95385	0	2.31061	2.34253	0	0	2.5619	0.23272	2.24225	0	2.54644	0	1.74497	0	0	0	2.35494	2.38132	0	0	0	0	1.88965	0
F2S4_170323_025_E01	118	#665C47	Astro Aqp4	3	#808285	Non-Neuronal	0.219328	0	0	2.48738	0	0.219328	0	0	2.73693	0	2.69525	0	2.88298	2.11974	0	0.219328	2.06927	0	0	1.08527	2.79233	0	0.219328	0	0	0	1.69565	1.86494	0	0	0	2.65297	0	0.219328
F2S4_170323_025_F01	118	#665C47	Astro Aqp4	3	#808285	Non-Neuronal	0	0	0	2.31927	0.222615	2.42842	0	0	2.75036	0	2.90228	2.78842	2.93826	2.11473	0	0	2.41632	0	2.72646	0	0	0	2.52609	0	0	0	2.15112	0	0	0	0	1.09284	2.16724	0.222615
F2S4_170323_025_G01	133	#598069	Microglia Siglech	3	#808285	Non-Neuronal	2.92721	0	0	2.65008	0	0	0	0	0	0	3.18795	0	2.473	0	0	0	3.53715	0	2.6631	0	0	0	1.81438	0	0	0	0	0	0	0	0	2.76941	2.20114	1.65148
F2S4_170323_025_H01	133	#598069	Microglia Siglech	3	#808285	Non-Neuronal	3.12362	0	0	2.16703	0	0	0	0	0	0	0	0	2.16703	0	0	0	3.40528	0	0	0	2.16295	0	1.72113	0	0	0	0	0	0	0	0	2.7031	2.61693	1.75917
F2S4_170323_026_B01	123	#476662	Oligo Synpr	3	#808285	Non-Neuronal	2.46411	0	0	2.62001	0	1.97909	0	0	0	0	2.85062	0.862522	2.72707	2.10783	0	1.17678	0.171311	1.24159	2.14846	1.97242	2.43426	0	0	0	0	1.61931	0	1.43318	0	1.6804	1.89949	2.16887	1.6039	1.80854
F2S4_170323_026_C01	118	#665C47	Astro Aqp4	3	#808285	Non-Neuronal	0	0	0	2.17446	0	0	0	0	3.09491	0	2.94012	0	2.49088	1.47798	0	0	0	0	0	0	2.00322	0	0	0	0	0	0	0	0	0	0	0	0	0
F2S4_170323_026_D01	122	#6C8581	Oligo Serpinb1a	3	#808285	Non-Neuronal	0.587186	0	0	3.0988	0	2.49678	0	0	0	0	2.94706	0	3.12719	2.62137	0	0	2.96631	1.15169	2.55391	0	2.60376	0	0	0	0	1.56265	0.331656	0	0	0	1.50441	2.51768	1.71121	0
F2S4_170323_026_E01	122	#6C8581	Oligo Serpinb1a	3	#808285	Non-Neuronal	2.35472	0	0	2.81705	0	0	0	0	0	0	2.87529	0	3.23512	2.78909	0	0	0	0	2.60998	0	2.66333	0	0	0	0	0	0	0	0	0	0	2.65748	2.06409	0
F2S4_170323_026_F01	133	#598069	Microglia Siglech	3	#808285	Non-Neuronal	3.26323	0	0	2.00824	0.502692	1.97441	0	0	0	0	2.56015	0	2.40315	0	0	0	3.56614	0	2.52413	0.189065	0	0	1.54858	0	0	0	0	0	0	1.79305	0	2.49859	1.75728	2.68949
F2S4_170323_026_G01	118	#665C47	Astro Aqp4	3	#808285	Non-Neuronal	1.68027	0	0	2.2774	0	0	0	0	2.49485	0	2.74259	0	3.14802	1.95309	0	0	2.90978	0	1.9881	0	2.22001	0	0.264196	0	0	0	0	0	0	0	0	0	0.836424	0
F2S4_170323_026_H01	118	#665C47	Astro Aqp4	3	#808285	Non-Neuronal	0	0	0	2.20822	0	0	0	0	2.20255	0	2.80684	0	2.59309	0	0	0	3.06375	0.229912	2.72141	0.971962	0	0	0	0	0	0	0	0	0	0.229912	0	0	1.5634	2.08292
F2S4_170323_027_A01	130	#997F7A	Endo Ctla2a	4	#8D1800	Endothelial	3.61683	0	0	2.31872	1.24641	0	0	0	0	0	0	0	3.30157	0	0	0	3.41199	0	0	0	2.86813	0	0	0	0	0	0	2.83326	0	0	0	0	2.51243	1.84177
F2S4_170323_027_B01	118	#665C47	Astro Aqp4	3	#808285	Non-Neuronal	2.0337	0	0	1.99291	0	0	0	0	2.75314	0	2.44221	2.4517	2.37204	1.70727	0	2.18739	3.00278	0	1.98151	0	1.74071	0	1.67104	0	0	0	1.28678	2.0398	0	0	0	2.77524	0	2.42922
F2S4_170323_027_D01	122	#6C8581	Oligo Serpinb1a	3	#808285	Non-Neuronal	0.190789	0	0	2.70817	0	0	0	0	0	0	2.6885	0	3.14986	2.76647	0	0	0	0	0	1.85497	2.70911	0	0	0	0	0	0	2.17592	0	0	0	0.190789	0	1.0386
F2S4_170323_027_E01	122	#6C8581	Oligo Serpinb1a	3	#808285	Non-Neuronal	0	0	0	2.77103	0	2.49468	0	0	0	0	2.88121	0	3.16457	2.38367	0	0	0	0.923594	2.5875	0	2.74296	0	0.195405	0	0	0	0	0	0	0	1.8143	0.923594	1.96606	2.26874
F2S4_170323_027_F01	119	#476655	OPC Pdgfra Grm5	3	#808285	Non-Neuronal	0.276119	0	0	2.19448	0	0.276119	0	0	0	0	2.87249	0	2.51229	2.37211	0	2.92507	0.276119	0	2.09518	2.98052	2.64074	0	2.83466	0	0	0	0	0	0	2.7901	0	0	1.97448	0
F2S4_170323_027_G01	119	#476655	OPC Pdgfra Grm5	3	#808285	Non-Neuronal	3.01486	0	2.30951	1.51368	1.44498	0	0	0	0	0	0	0	2.77357	2.2378	0	0	0	1.47203	2.79237	0	2.71174	0.341192	2.97693	0	0	0	0	0	0	0	0.529886	0	1.83913	0
F2S4_170323_027_H01	130	#997F7A	Endo Ctla2a	4	#8D1800	Endothelial	3.44684	0	0	2.57776	0	0	0	0	0	0	2.83132	0	2.70683	0	0	0	0	0	0	0	2.11476	0	0	0	2.309	0	0	0	0	0	0	2.86696	1.97724	0
F2S4_170323_028_B01	122	#6C8581	Oligo Serpinb1a	3	#808285	Non-Neuronal	0	0	0	3.1869	0	0	0	0	0	0	2.14762	0	3.41503	2.48748	0	0	2.995	0	2.6881	0	2.44903	0	0	0	0	0	0	0.209495	0	0	0	0	1.97593	0
F2S4_170323_028_C01	118	#665C47	Astro Aqp4	3	#808285	Non-Neuronal	0	0	0	2.22284	0	0	0	0	3.18208	0	0.21779	0	2.64269	2.26935	0	0	2.92176	0	0	0	2.27539	0	0.976126	0	0	0	0	0	0	2.29447	0	0	0	0
F2S4_170323_028_D01	118	#665C47	Astro Aqp4	3	#808285	Non-Neuronal	1.88716	0	0	2.53124	0.788939	0	0	0	2.72554	0	2.72084	0	2.52312	1.7296	0	0	2.91593	0	2.32906	0.586769	2.1534	0	1.92124	0	0	0	2.67972	0	0	2.22413	0	0	1.69086	0.863058
F2S4_170323_028_E01	122	#6C8581	Oligo Serpinb1a	3	#808285	Non-Neuronal	0	0	0	2.43683	0	0	0	0	2.66456	0	2.75798	0	2.95679	0.211186	0	0	0	1.9385	0	0	2.44666	0	0	0	0	0	0	0	0	0.459202	0	2.35497	1.57197	2.98104
F2S4_170323_028_F01	118	#665C47	Astro Aqp4	3	#808285	Non-Neuronal	0.246418	0	0	2.12173	0	0	0	0	2.47097	0	2.50441	0	0	2.25084	0	2.22791	0	0	0.246418	2.86032	2.18677	0	0	0	0	0	2.0452	2.67341	0	0	0	0	0	0
F2S4_170323_028_H01	118	#665C47	Astro Aqp4	3	#808285	Non-Neuronal	0	0	0	0	0	0	0	0	3.06858	0	0	2.14321	2.86279	0	0	0	0	0	2.74534	0	0	0	2.53195	0	0	0	0	0	0	0	0	0	0	0
F2S4_170323_035_A01	118	#665C47	Astro Aqp4	3	#808285	Non-Neuronal	2.1746	0	0	2.4719	0	0	0	0	0	0	2.509	0	2.55556	2.2548	0	0	2.98066	0	0	2.45919	2.61352	0	0	0	0	0	0.40736	0	0	0	2.57034	2.49948	1.48489	2.27318
F2S4_170323_035_B01	122	#6C8581	Oligo Serpinb1a	3	#808285	Non-Neuronal	0	0	0	2.63521	0	0	0	0	0	0	3.09905	0	3.20326	2.11584	0	0	0	2.08301	2.33368	0	2.6792	0	0	0	0	0	0	0	0	0	2.60175	2.4152	2.2824	2.42183
F2S4_170323_035_D01	122	#6C8581	Oligo Serpinb1a	3	#808285	Non-Neuronal	2.24061	0	0	2.90765	0	0	0	0	0	0	3.08036	0.311465	3.04979	2.43048	0	0	2.04369	1.32065	3.03743	0	2.79365	0	0	0	0	0	0	1.75665	0	0	0	2.4955	1.78744	0
F2S4_170323_035_E01	133	#598069	Microglia Siglech	3	#808285	Non-Neuronal	0	0	0	2.50251	0	0	0	0	0.270431	0	2.7933	0	0	0	0	0	2.83254	0	2.31516	2.59369	2.39004	0	0.848038	0	0	0	0	0	0	0	2.21787	3.21206	2.07052	2.68246
F2S4_170323_035_F01	133	#598069	Microglia Siglech	3	#808285	Non-Neuronal	2.83068	0	0	0	0	0.25463	0	0	0.25463	0	2.83929	0	2.46424	0	0	0	2.87443	1.39655	1.64401	2.26573	2.11184	0	0	0	0	0	0	0.25463	0	0	1.05559	2.59997	2.49742	0.25463
F2S4_170323_035_G01	118	#665C47	Astro Aqp4	3	#808285	Non-Neuronal	0	0	0	2.38029	0	0	0	0	2.77976	0	2.63449	0	2.83036	0	0	0	2.67319	0	0	0.219721	2.25237	0	1.13072	0	0.219721	0	0	0	0	0	0	2.6251	0	0
F2S4_170323_036_B01	122	#6C8581	Oligo Serpinb1a	3	#808285	Non-Neuronal	0	0	0	2.54579	0	1.58332	0	0	0	0	2.93049	0	3.04001	2.55636	0	0	0	2.04653	2.39085	0	2.39748	0	0	0	0	0	0	1.72354	0	0	0	2.32831	1.81522	1.84306
F2S4_170323_036_C01	118	#665C47	Astro Aqp4	3	#808285	Non-Neuronal	0	0	0	2.27046	0	1.43373	0	0	2.68727	0	0	2.30248	0.253421	0	0	0	2.85038	0	2.67725	0	2.1249	0	2.20483	0	0	0	0	0	0	0	0	2.76299	0	2.4947
F2S4_170323_036_E01	118	#665C47	Astro Aqp4	3	#808285	Non-Neuronal	0	0	0	0.422556	0	0	0	0	2.87449	0	2.75871	0	0	0	0	0	0	0	0.260762	0	0.260762	0	1.15126	0	0	0	0	0	0	2.7499	0	0	2.11459	0
F2S4_170323_036_F01	118	#665C47	Astro Aqp4	3	#808285	Non-Neuronal	1.73238	0	0	0	0	0	0	0	3.62376	0	2.81845	0	2.31419	0	0	2.37773	2.22005	0	2.80178	2.41212	0	0	0	0	0	0	0	1.59622	0	0	0	0	0	0
F2S4_170323_036_H01	122	#6C8581	Oligo Serpinb1a	3	#808285	Non-Neuronal	0	0	0	2.96365	0	1.958	0	0	0	0	3.23818	0	3.08326	1.50001	0	0	0	0	3.01181	0	2.82642	0	0	0	0	0	0	0	0	0	0	1.93404	0	2.37336
F2S4_170323_037_A01	122	#6C8581	Oligo Serpinb1a	3	#808285	Non-Neuronal	0	0	0	2.8293	0	0.321745	0	0	0	0	3.12467	0	3.11819	1.93209	0.910363	0	3.24526	2.07355	2.89897	1.80325	2.94407	0	0	0	0	0	0	0	0	2.35311	2.26557	2.14055	2.0835	1.88192
F2S4_170323_037_B01	118	#665C47	Astro Aqp4	3	#808285	Non-Neuronal	0	0	0	2.55852	0	0	0	0	0.711609	0	2.50677	0	2.33747	2.24559	0	0	2.30481	0	0	0	2.79401	0	0.776496	0	2.68983	0	2.34568	0	0	0.262339	0	0	1.92404	0
F2S4_170323_037_C01	119	#476655	OPC Pdgfra Grm5	3	#808285	Non-Neuronal	0	0	0	2.06494	1.7202	0	0	0	0	0	3.02896	0	3.01711	2.04166	0	0	0	0	2.54709	0	2.86311	0	2.4125	0	0	0	0	2.61758	0	2.56537	0	2.64226	0	2.62231
F2S4_170323_037_D01	133	#598069	Microglia Siglech	3	#808285	Non-Neuronal	2.7908	0	0	2.42113	0	0	0	0	0	0	2.23114	0	2.3568	0	0	0	3.51843	0	2.25499	0	0	0	2.74866	0	0	0	0	0	0	0	2.21589	2.25756	1.76043	0
F2S4_170323_037_E01	122	#6C8581	Oligo Serpinb1a	3	#808285	Non-Neuronal	0	0	0.180508	2.58537	0	0	0	0	0	0	3.02573	0	3.14215	2.37573	0	0	0	1.93724	1.9744	0	2.99447	0.180508	0	0	0	0	0	0	0	0	0	2.51208	1.74928	2.51414
F2S4_170323_037_G01	133	#598069	Microglia Siglech	3	#808285	Non-Neuronal	2.87556	0	0	0	0	0	0	0	0	0	0	0	0.424719	2.63248	0	0	3.30607	0	0	0	0.635283	0	0	0	0	0	0	0	0	0	1.48942	0	0	0
F2S4_170323_037_H01	123	#476662	Oligo Synpr	3	#808285	Non-Neuronal	2.29414	0	0	3.0281	2.39546	0	0	0	0	0	3.11835	0	3.07344	2.41433	1.03662	0	0.198977	1.63774	2.88214	1.25173	2.70467	0	0	0	0	0.932226	0	0	0	1.98888	0.438303	2.56825	1.17458	0
F2S4_170323_038_A01	123	#476662	Oligo Synpr	3	#808285	Non-Neuronal	0	0	0	3.0549	0	1.25464	0	0	0	0	2.85697	0	2.83407	2.1696	0	1.99057	2.97911	1.53083	2.19937	2.28826	2.78395	0	0	0	0	0	2.51055	0	0	2.01006	1.02059	2.49349	1.51787	2.54711
F2S4_170323_038_B01	118	#665C47	Astro Aqp4	3	#808285	Non-Neuronal	0	0	0	2.57915	0	0	0	0	2.40568	0	0.204311	0	2.69124	1.2046	0	0	2.94912	1.42863	2.42474	0	2.31226	0	1.78154	0	2.88779	0	1.79846	0	0	0	0	2.07459	0	0
F2S4_170323_038_C01	122	#6C8581	Oligo Serpinb1a	3	#808285	Non-Neuronal	2.02099	0	0	2.77307	0	0	0	0	0	0	2.70058	1.73086	3.055	1.84467	0	0	2.56964	1.80493	2.6539	0	2.71941	0	0	0	0	1.42441	0	0	0	0	1.32247	1.73974	1.55656	2.56703
F2S4_170323_038_D01	133	#598069	Microglia Siglech	3	#808285	Non-Neuronal	3.45074	0	0	2.4072	0	0	0	0	0	0	2.53944	0	2.24839	0	0	0	3.51426	1.57568	2.75131	0.231641	1.17879	0	2.96837	0	0	0	0	0.773253	0	0	0	0	2.2029	0
F2S4_170323_038_E01	123	#476662	Oligo Synpr	3	#808285	Non-Neuronal	0	0	0	2.74282	0	0	0	0	0	0	2.70446	1.57718	2.89417	2.68133	0	0	0	1.80644	2.60347	0.559503	2.91933	0	0.183362	0	0.311891	0	0	0.183362	0	0	2.1182	2.44133	1.16609	2.21305
F2S4_170323_038_F01	122	#6C8581	Oligo Serpinb1a	3	#808285	Non-Neuronal	0	0	0	3.03391	0	0	0	0	0	0	2.97485	1.36982	2.94301	2.30849	0	0	0	1.83073	2.28322	0	2.83745	0	0	0	0	0	0	0	0	0	1.52128	0.197333	1.2475	1.53607
F2S4_170323_038_G01	118	#665C47	Astro Aqp4	3	#808285	Non-Neuronal	0	0	0	2.50541	0.222136	1.61348	0	0	2.54685	0	0	0	2.73923	1.82244	0	0	3.02616	0	2.80712	0.95488	2.74292	0	0	0	1.76662	0	0	0	1.95975	0	0	2.21112	0	2.56696
F2S4_170323_038_H01	118	#665C47	Astro Aqp4	3	#808285	Non-Neuronal	0	0	0	1.65477	0	0	0	0	2.73748	0	2.79286	0	2.8679	0	2.20063	0	2.86375	1.75111	2.18102	0.903623	2.55619	0	0	0	1.82538	0	0	0	0	0	0	0.2307	0	0
F2S4_170323_039_A01	118	#665C47	Astro Aqp4	3	#808285	Non-Neuronal	0	0	0	2.02632	0	0	0	0	2.1461	0	2.56603	0	1.75769	2.12043	0	0	2.65563	0	1.54087	0	2.107	0	0	0	0	0	0	0	0	0	0	0	0	1.49872
F2S4_170323_039_B01	122	#6C8581	Oligo Serpinb1a	3	#808285	Non-Neuronal	2.31064	0	0	2.82183	0	0	0	0	0	0	3.11831	2.68272	3.03717	2.31351	0	0	0	1.88487	2.736	0.889863	2.7717	0	0	0	0	0	0	0	0	0	0	1.96502	2.26846	0
F2S4_170323_039_C01	119	#476655	OPC Pdgfra Grm5	3	#808285	Non-Neuronal	0	0	0	0	0	0	0	0	0	0	2.73973	2.75742	2.91459	0	0	0	0	0	0	0	2.58516	0	2.55639	0	0	0	0	0	0	0	1.32429	0	2.02184	0
F2S4_170323_039_D01	122	#6C8581	Oligo Serpinb1a	3	#808285	Non-Neuronal	0	0	0	2.94484	0	0	0	0	0	0	2.83259	0	3.10094	2.60278	2.2354	0	0	0.904465	0	2.5211	2.55261	0	0	0	0	0	0	0	0	0	0	0	2.31285	0
F2S4_170323_039_E01	118	#665C47	Astro Aqp4	3	#808285	Non-Neuronal	0	0	0	2.15421	0	0	0	0	3.09884	0	2.67378	0	2.59054	0	0	0	0	0	2.82973	1.75208	2.29486	0	1.61482	0	0	0	0	0	0	0	0	0	0	2.77051
F2S4_170323_039_F01	119	#476655	OPC Pdgfra Grm5	3	#808285	Non-Neuronal	2.4412	0	0	2.68375	0	0	0	0	0	0	3.07342	0	3.08474	0	0.985913	0	0	0	2.66378	1.99983	0.437143	0	2.70805	0	0	0	0	0	0	0	0	0	0	0
F2S4_170323_039_G01	119	#476655	OPC Pdgfra Grm5	3	#808285	Non-Neuronal	0	0	0	0	0	0	0	0	0	0	3.06556	0	2.99745	0	2.05326	0	0	0	0	0	2.30337	0	3.16277	0	0	0	0	1.49911	0	0	1.7932	2.72542	1.96354	0
F2S4_170323_039_H01	118	#665C47	Astro Aqp4	3	#808285	Non-Neuronal	0	0	0	2.36339	0	2.51339	0	0	2.9132	0	2.79522	2.66213	2.58286	1.7915	1.87783	0	2.69661	0	3.12925	0.498095	2.13466	0	0	0	1.82066	0	2.32097	0	0	0	0.386015	0	0	0
F2S4_170323_040_A01	122	#6C8581	Oligo Serpinb1a	3	#808285	Non-Neuronal	0	0	0	2.913	0	0	0	0	0	0	2.92754	0	2.94864	2.24238	0	0	2.98539	1.654	2.46645	1.03036	2.82313	0	0	0	0	0.217027	0	0	0	2.27045	0	2.24559	1.58658	1.51541
F2S4_170323_040_B01	133	#598069	Microglia Siglech	3	#808285	Non-Neuronal	3.37916	0	0	2.50796	0	0	0	0	0	0	2.7428	0	2.4282	0	0	0	3.25124	0.251179	2.61006	0	0	0	0	0	0	0	0	0	0	0	0	0	2.27814	0
F2S4_170323_040_C01	119	#476655	OPC Pdgfra Grm5	3	#808285	Non-Neuronal	2.67235	0	0	2.64355	0	0	0	0	0	0	2.59273	1.00936	2.94285	0	0	0	0	0	2.67157	0	2.46381	0	2.91676	0	0.931551	0	0	0	1.53806	2.42043	0	2.42181	2.17168	0
F2S4_170323_040_E01	122	#6C8581	Oligo Serpinb1a	3	#808285	Non-Neuronal	0	0	0	2.77271	0	0	0	0	0	0	2.85617	1.88791	3.08673	2.30871	0	0	0	1.32275	2.48464	1.59672	2.77327	0	0	0	0	1.38214	0	0	0	0	0	2.47466	2.17953	1.35346
F2S4_170323_040_F01	119	#476655	OPC Pdgfra Grm5	3	#808285	Non-Neuronal	0	0	0	1.69333	0	0	0	0	2.56453	0	3.03605	0.256696	2.76557	2.15972	0	0	0.256696	0	0.256696	2.85968	2.19907	0	1.30839	0	0	0	0	0	0.625686	0	1.54218	2.24721	1.50002	2.71331
F2S4_170323_040_G01	118	#665C47	Astro Aqp4	3	#808285	Non-Neuronal	0	0	0	2.58196	0	0	0	0	3.21389	0	2.90768	0.921212	3.02116	2.10803	0	0	3.20778	0	3.08066	0	2.563	0	0	0	0	0	0	0	1.63763	0	0	2.7259	1.85215	0.826695
F2S4_170323_040_H01	118	#665C47	Astro Aqp4	3	#808285	Non-Neuronal	0	0	0	2.45085	0	0	0	0	2.82737	0	2.58201	1.40707	2.69164	1.99933	2.4304	0	2.50795	0	2.43156	0	2.15135	0	2.26544	0	0	0	2.5754	0	0	2.13788	0	2.55231	1.43095	0
F2S4_170323_041_A01	118	#665C47	Astro Aqp4	3	#808285	Non-Neuronal	0	0	0	0	0	0	0	0	2.18427	0	0	0	0	0	0	0	0	0	0	0	0	0	1.06424	0	0	0	2.90642	0	0	0	0	0	0	0
F2S4_170323_041_B01	122	#6C8581	Oligo Serpinb1a	3	#808285	Non-Neuronal	0	0	0	2.96636	0	0	0	0	0	0	2.97702	2.96636	3.21074	1.76406	0	0	0	0.995472	2.07779	1.58056	2.92897	0	0	0	0	0	0	0	0	0	0	1.75283	2.16964	2.51481
F2S4_170323_041_D01	118	#665C47	Astro Aqp4	3	#808285	Non-Neuronal	0	0	0	2.14129	0	0	0	0	2.78937	0	0	0.291036	2.62426	0	0	0	0	1.39554	0	0.463744	1.79963	0	2.23757	0	0	0	2.36007	0	0	0	0.291036	2.05183	0	2.23516
F2S4_170323_041_E01	122	#6C8581	Oligo Serpinb1a	3	#808285	Non-Neuronal	2.20514	0	0	2.96856	0	0	0	0	0	0	2.77847	2.35818	3.16758	2.37858	0	0	3.61377	1.18172	2.03903	2.14928	2.56981	0	0	0	0	0	0	0	0	2.11411	2.1552	2.33935	1.50477	1.78539
F2S4_170323_041_F01	119	#476655	OPC Pdgfra Grm5	3	#808285	Non-Neuronal	2.08867	0	0	2.23669	0	0	0	0	0	0	0	0.291788	2.75877	2.21442	2.79359	0	0	1.61523	2.85814	1.1288	0	2.54957	2.70234	0	0	0	0	2.59096	0	0	1.72984	0	1.82669	0
F2S4_170323_041_G01	118	#665C47	Astro Aqp4	3	#808285	Non-Neuronal	0	0	0	1.97532	0	0	0	0	1.68297	0	3.26173	0	2.89442	0	0	0	2.79614	0	2.75102	0	2.01515	0	1.62158	0	2.06879	0	0	0	0	0	0	0	0	2.0227
F2S4_170323_041_H01	122	#6C8581	Oligo Serpinb1a	3	#808285	Non-Neuronal	1.90509	0	0	2.9155	0	0	0	0	0	0	2.24556	1.56766	2.89159	2.44581	0	0	3.4711	0	2.40835	0	2.51763	0	0	0	0	0	0	0	0	2.24723	1.38138	2.24889	2.13783	2.00018
F2S4_170323_048_A01	122	#6C8581	Oligo Serpinb1a	3	#808285	Non-Neuronal	0	0	0	3.11369	0	0	0	0	0	0	3.15263	0	2.9405	2.92827	0	0	0	1.13028	0	0	2.89372	0	0	0	0	0	0	0	0	0	2.96728	2.77484	2.56785	2.06963
F2S4_170323_048_B01	119	#476655	OPC Pdgfra Grm5	3	#808285	Non-Neuronal	0	0	0	0.285822	0	0	0	0	0	0	2.89798	2.73252	3.06701	0.456723	0	0	0	0	2.77254	0	2.5557	0	2.63842	0	0	0	0	0	0	0	0	2.61844	1.27166	3.18654
F2S4_170323_048_C01	118	#665C47	Astro Aqp4	3	#808285	Non-Neuronal	0	0	0	0	2.4956	0	0	0	1.78008	0	0.234026	2.86968	0.234026	0	0	0	0	0	0	1.80019	2.32999	0	0.659944	0	2.15346	0	0	2.62562	1.73111	0	0.586163	2.69784	0	0
F2S4_170323_048_D01	122	#6C8581	Oligo Serpinb1a	3	#808285	Non-Neuronal	0.89408	0	0	2.46636	0	0	0	0	0	0	0.825845	2.00543	3.04781	2.85795	0	0.33027	2.51735	1.6234	0.33027	2.74137	2.58796	0	0	0	0	0	0	0	0	0	0	0	2.0292	2.32586
F2S4_170323_048_E01	128	#665547	Peri Kcnj8	4	#8D1800	Endothelial	3.39836	0	0	0	0	0	0	0	0	0	2.51275	0.322322	2.7317	0.505285	0	3.11011	0	0	0	0	0.322322	0	1.99053	0	0	0	0	0	0	0	0	1.07936	0	0.322322
F2S4_170323_048_F01	122	#6C8581	Oligo Serpinb1a	3	#808285	Non-Neuronal	0	0	0	2.55613	0	0	0	0	0	0	0	0	3.0941	2.22527	0	0	0	2.14355	3.01274	0	2.91531	0	0	0	0	0	0	0	0	0	0	2.84452	2.00514	0.218757
F2S4_170323_048_G01	120	#475D4B	OPC Pdgfra Ccnb1	3	#808285	Non-Neuronal	0	0	2.94154	2.26883	0.969176	0	0	0	0	0	3.28356	0	2.84586	0	1.77235	0	0	0	0	1.79361	2.42178	0	2.78643	0	0	0	0	1.3262	0	0	0.876974	1.71166	0	2.55382
F2S4_170323_048_H01	119	#476655	OPC Pdgfra Grm5	3	#808285	Non-Neuronal	0	0	0	0	0	0	0	0	0	0	2.93208	0	2.96179	0	2.25228	0	0	0	0	0	2.30613	0	3.00406	0	0	0	0	0	0.526303	3.0091	1.74865	0.252021	1.57034	0
F2S4_170323_049_A01	133	#598069	Microglia Siglech	3	#808285	Non-Neuronal	3.09457	0	0	2.49741	0.735967	0	0	0	0	0	0	0	1.53573	2.31271	0	0	2.98474	0	2.70844	0	0.32452	0	1.29863	0	0	0	0	0	0	0	1.60087	2.82168	2.61737	2.91259
F2S4_170323_049_B01	118	#665C47	Astro Aqp4	3	#808285	Non-Neuronal	0	0	0	3.0222	0	0	0	0	2.36652	0	0.27898	0	2.8502	2.4291	0	0	0	0	2.78921	0	3.41201	0	2.26458	0	0	0	0	0	0	0	0	0	0	1.66322
F2S4_170323_049_C01	118	#665C47	Astro Aqp4	3	#808285	Non-Neuronal	0	0	0	2.61786	0	0	0	0	3.05549	0	0	0	2.43571	0	0	0	3.05129	2.02055	1.90656	0	2.30463	0	1.07668	0	2.37581	0	0	0	0	0	0	0	0	0
F2S4_170323_049_D01	118	#665C47	Astro Aqp4	3	#808285	Non-Neuronal	0.885091	0	0	2.02877	0	0	0	0	2.46088	0	2.90881	0	1.83092	2.48594	0	2.03646	2.41242	0	2.32971	0	2.18362	0	1.79261	0	2.5272	0	0	1.55971	0	0	1.51147	0	1.55971	0
F2S4_170323_049_E01	122	#6C8581	Oligo Serpinb1a	3	#808285	Non-Neuronal	2.73711	0	0	2.73023	0	0	0	0	0.186331	0	2.43388	0	3.14143	2.51777	0	0	3.05856	2.1267	0	0	2.98664	0	0	0	0	0	0	2.2603	0	0	1.39985	0	0	1.17407
F2S4_170323_049_F01	133	#598069	Microglia Siglech	3	#808285	Non-Neuronal	2.91398	0	0	2.50565	0	0	0	0	0	0	0	0	2.65809	0	0	0	3.18664	0	0	0	2.24925	0	0.931898	0	0	0	0	0	0	0	0	0.19884	0	0
F2S4_170323_049_G01	118	#665C47	Astro Aqp4	3	#808285	Non-Neuronal	0	0	0.259172	1.81613	0	0	0	0	1.122	0	0.259172	0	1.69875	0	0	0	2.81557	0	2.53736	1.19568	2.10557	0	0	0	0	2.93721	0	0	0	0	0	0	0	0
F2S4_170323_049_H01	118	#665C47	Astro Aqp4	3	#808285	Non-Neuronal	0	0	0	2.56786	0	0	0	0	2.98656	0	2.58503	0	2.78748	2.0875	0	0.37209	2.74409	0	2.5416	2.29269	1.85423	0	1.98786	0	1.65374	0	0	0	0	2.70815	0	0	1.69127	0
F2S4_170323_050_A01	118	#665C47	Astro Aqp4	3	#808285	Non-Neuronal	0	0	0	2.11787	0	0	0	0	3.27975	0	2.88846	0	3.25595	2.04312	0	0	2.66966	0.98152	2.89007	0	2.25137	0	1.3782	0	0	0	0	0	0	0	0	0	1.99561	0
F2S4_170323_050_B01	118	#665C47	Astro Aqp4	3	#808285	Non-Neuronal	0	0	0	2.76216	0	1.74413	0	0	3.13672	0	0	0	2.3279	0	0	0	2.91145	0	0	0	2.1086	0	2.12608	0	2.30771	0	0	1.51366	0	0	0	2.53283	2.26219	0
F2S4_170323_050_C01	122	#6C8581	Oligo Serpinb1a	3	#808285	Non-Neuronal	0.199558	0	0	2.94963	0	0	0	0	0	0	2.71659	0	2.98038	2.49237	0	0	2.99651	0.903055	2.59241	0	2.81808	0	0	0	0	0	0	0	0	0	0.870174	2.16158	1.79001	2.18037
F2S4_170323_050_D01	120	#475D4B	OPC Pdgfra Ccnb1	3	#808285	Non-Neuronal	2.11697	0	2.85164	2.22064	0	0	0	0	0	0	2.73132	0	2.89568	0	0.398262	0	0	0	2.29939	0	2.22455	0	2.4371	0	0	0	0	0	0	0	0	0	0	2.76732
F2S4_170323_050_E01	133	#598069	Microglia Siglech	3	#808285	Non-Neuronal	3.11932	0	0	2.5809	0	0	0	0	0	0	2.84213	0	2.43803	0	0	0	3.45659	0	0	0	0	0	0	0	0	0	0	2.28949	0	0	0	0	2.22545	2.33303
F2S4_170323_050_F01	122	#6C8581	Oligo Serpinb1a	3	#808285	Non-Neuronal	2.54889	0	0	2.81803	0	0	0	0	0	0	2.80722	0	3.03824	1.93284	0	0	0	1.62702	2.48583	2.38974	2.55048	0	0	0	0	0	0	0	0	0	0	0	0	2.39542
F2S4_170323_050_G01	122	#6C8581	Oligo Serpinb1a	3	#808285	Non-Neuronal	0	0	0	2.71541	2.02962	0	0	0	0	0	2.71819	0	2.98954	2.57117	0	0	0	1.86751	2.77476	2.1636	2.72205	0	0	0	0	0	0	1.39817	0	0	1.6059	0	2.22296	2.14117
F2S4_170323_050_H01	118	#665C47	Astro Aqp4	3	#808285	Non-Neuronal	0.253516	0	0	1.49309	0	0	0	0	2.55356	0	2.52982	0	3.1143	2.08172	0	0	3.07732	0	2.36042	0	0	0	1.78709	0	2.63334	0	1.68631	0	0	0	0	0	0	0
F2S4_170323_051_A01	123	#476662	Oligo Synpr	3	#808285	Non-Neuronal	0.173469	0	0	2.75139	0	2.12568	0	0	0	0	2.74415	0	2.97346	2.31537	0	1.98339	0.173469	1.9676	2.66925	0.838322	2.77743	0	0	0	0	0	0	1.81828	1.1967	1.9878	0	2.66374	1.94156	2.48207
F2S4_170323_051_B01	122	#6C8581	Oligo Serpinb1a	3	#808285	Non-Neuronal	0	0	0	2.9906	0	0	0	0	0	0	3.35006	0	0	0	0	0	0	0	2.25178	2.69638	2.35419	0	0	0	0	0	0	0	0	2.52162	0	0	2.11407	0
F2S4_170323_051_C01	118	#665C47	Astro Aqp4	3	#808285	Non-Neuronal	0	0	0	0	0	0	0	0	2.28568	0	2.56553	0	2.18676	2.61063	0	0	3.01509	0	0	0	2.52952	0	0.451648	0	0	0	0	0	0	0	0	0	0	0
F2S4_170323_051_D01	123	#476662	Oligo Synpr	3	#808285	Non-Neuronal	2.24467	0	0	2.52238	0	2.00254	0	0	0	0	2.76998	0	2.69804	2.29018	0	2.18811	2.58895	1.08762	1.77246	2.262	2.14743	0	0	0	0	1.36097	0	0	0	1.84475	2.06981	2.17348	0.985959	2.39117
F2S4_170323_051_E01	133	#598069	Microglia Siglech	3	#808285	Non-Neuronal	2.89657	0	0	2.40993	0	2.53913	0	0	0	0	3.06093	0	2.60332	0	0	0	3.45466	0.834432	2.29587	1.71501	1.72812	0	0.673031	0	0	0	0	0	0	0	0	2.30622	2.29118	2.14074
F2S4_170323_051_F01	118	#665C47	Astro Aqp4	3	#808285	Non-Neuronal	0.228897	0	0	2.16856	0	0	0	0	3.19819	0	2.88916	0	2.72975	0	0	0	3.37196	0	2.07034	0	1.95339	0	0.969753	0	0	0	0	0	0	0	1.65048	0.228897	1.32478	0
F2S4_170323_051_G01	128	#665547	Peri Kcnj8	4	#8D1800	Endothelial	2.81287	0	0	2.60299	0	0	0	0	0	0	3.15661	0	2.96116	2.6378	0	0	0	1.8636	2.50802	2.29913	2.48229	0	2.04582	0	0	0	0	0	0	2.64087	0	0	2.10583	1.84484
F2S4_170323_051_H01	133	#598069	Microglia Siglech	3	#808285	Non-Neuronal	2.8998	0	0	2.11159	0.180483	0	0	0	0	0	2.36901	0	3.02397	0	0	0	3.34799	1.51095	2.89155	0	1.8224	0	1.81218	0	0	0	0	0	0	1.99063	0	0	2.45391	0
F2S4_170323_052_A01	118	#665C47	Astro Aqp4	3	#808285	Non-Neuronal	0.211548	0	0	2.10858	2.36775	0.211548	0	0	2.47125	0	2.84207	0	0	0	0	0	2.55325	0	2.5249	0	2.3883	2.40578	1.23849	0	0	0	1.51028	0	0	0	0	0	0	0
F2S4_170323_052_B01	122	#6C8581	Oligo Serpinb1a	3	#808285	Non-Neuronal	0	0	0	2.92877	0	0	0	0	0	0	2.74583	0	2.95271	1.96271	0	0	2.04195	0	0	2.52422	2.60992	0	0	0	0	0	0	1.91119	0	0	0	2.42003	1.65094	2.05661
F2S4_170323_052_C01	123	#476662	Oligo Synpr	3	#808285	Non-Neuronal	1.65225	0	0	2.58182	0	0	0	0	0	0	2.83858	0	2.97029	1.58229	0	1.89112	3.17327	1.32308	2.36808	0	2.59095	0	0	0	0	1.09525	1.65225	0	0	0	0	2.5624	1.70027	2.4063
F2S4_170323_052_D01	118	#665C47	Astro Aqp4	3	#808285	Non-Neuronal	1.2812	0	0	0	0	0	0	0	2.25298	0	2.92008	0	1.46489	2.38638	0	2.37364	3.24512	0	2.36429	0	2.11983	0	0.302321	0	2.49253	0	2.0781	0	0	0	0	2.01539	2.17282	2.24311
F2S4_170323_052_E01	133	#598069	Microglia Siglech	3	#808285	Non-Neuronal	2.81882	0	0	2.73043	0.192177	0	0	0	0	0	0	0	2.45294	0	0	0	3.36451	0	0	0	1.87522	0	0	0	0	0	0	0	0	0	0	0	2.24906	1.46815
F2S4_170323_052_F01	133	#598069	Microglia Siglech	3	#808285	Non-Neuronal	3.66504	0	0	2.73888	0	0	0	0	0	0	0.19922	0	3.20124	0	0	0	0	2.52138	0	0	0.19922	0	2.62031	0	0	0	0	1.8358	0	0	0	0	0	0
F2S4_170323_052_G01	118	#665C47	Astro Aqp4	3	#808285	Non-Neuronal	2.3664	0	0	2.07866	0	0	0	0	1.67826	0	2.96384	0	3.08726	0	0	0	0.351132	0	0	0	2.15117	0.210127	0	0	1.87895	0	0	0	0	0	0	2.56455	2.32751	2.2848
F2S4_170323_052_H01	118	#665C47	Astro Aqp4	3	#808285	Non-Neuronal	0	0	0	0	2.4605	2.73	0	0	3.10456	0	2.78216	0	3.04453	0	0	0	2.93139	0	0	0	1.95535	0	0	0	0	0	0	0	0	0	0	0	1.91969	0
F2S4_170323_059_A01	118	#665C47	Astro Aqp4	3	#808285	Non-Neuronal	1.43633	0	0	2.10029	2.14342	0	2.42764	0	2.35033	0	2.57233	0	2.46747	0	0	0	3.03929	0	2.88003	0	1.84365	0	2.26477	0	1.70442	0	0	2.40165	0	0	1.67799	1.69404	1.23414	2.11845
F2S4_170323_059_B01	122	#6C8581	Oligo Serpinb1a	3	#808285	Non-Neuronal	0	0	0	2.65125	0	0	0	0	0	0	1.74162	2.90997	3.12994	2.4537	0	0	2.37349	2.00529	2.71771	2.2484	2.38811	0	0	0	0	2.38811	0	0	0	0.210191	0	1.10816	0	2.84011
F2S4_170323_059_D01	118	#665C47	Astro Aqp4	3	#808285	Non-Neuronal	1.09714	0	0	2.26233	0	0	0	0	2.40753	0	1.16626	0	2.8522	2.06201	0	0	2.9188	0	2.24491	0	2.17152	0	2.53021	0	0.829517	0	0	1.32504	0	0	0	2.22305	1.52326	1.45222
F2S4_170323_059_E01	133	#598069	Microglia Siglech	3	#808285	Non-Neuronal	3.33454	0	0.337307	2.08617	0	0	0	0	0	0	0.755642	0	2.67705	0	0	0	3.42056	0	0.337307	0	0.524847	0	0.337307	0	0	0	0	0	0	0	0	0	2.35723	2.87922
F2S4_170323_059_F01	118	#665C47	Astro Aqp4	3	#808285	Non-Neuronal	0.228616	0	0	2.31984	0.576499	0	0	0	2.90601	0	3.00542	0	2.53211	0	0	0	2.95938	1.46844	2.43991	0	2.35311	0	2.12267	0	0	0	0	0	0	0	2.09213	0	0	0
F2S4_170323_059_G01	122	#6C8581	Oligo Serpinb1a	3	#808285	Non-Neuronal	0	0	0	3.10537	0	0	0	0	0	0	3.13753	0	3.08464	2.66527	0	0	2.80592	1.61065	2.66239	0	2.66181	0	0	0	0	0	0	0	0	0	0	1.57678	1.83085	2.59896
F2S4_170323_059_H01	128	#665547	Peri Kcnj8	4	#8D1800	Endothelial	2.71584	0	0	2.47365	0	0	0.715364	0	0	0	2.99673	0.311348	1.46684	2.50463	0	0	0.311348	2.2898	0	0	2.84838	0	1.69207	0	0	0	0	0	0	2.56934	0	0	0	2.85796
F2S4_170323_060_A01	122	#6C8581	Oligo Serpinb1a	3	#808285	Non-Neuronal	2.63173	0	0	2.99747	2.10814	0	0	0	0	0	2.6346	0	2.96528	2.69539	0.195399	0	2.81131	0	2.4899	0.893112	2.76891	0	0	0	0	0	0	0	0	0.195399	1.24248	2.41985	1.82916	2.10621
F2S4_170323_060_B01	118	#665C47	Astro Aqp4	3	#808285	Non-Neuronal	2.29247	0	0	0	0	0.921658	0	0	1.97253	0	2.47662	0	2.86724	2.05912	0	0	2.92299	0	2.31552	2.39365	2.60983	0	1.64766	0	0	0	2.33204	1.34986	1.44288	0	2.45984	0.222231	0	1.98772
F2S4_170323_060_C01	118	#665C47	Astro Aqp4	3	#808285	Non-Neuronal	0	0	0	0	1.27771	0	0	0	2.76007	0	0.420321	0	0	2.57566	0	0	2.67158	1.65389	2.51078	0	2.42659	0	2.87611	0	0.259141	0	0.259141	0	0	0	0	0	0	0.259141
F2S4_170323_060_D01	122	#6C8581	Oligo Serpinb1a	3	#808285	Non-Neuronal	1.4502	0	0	2.86119	2.44517	0	0	0	0	0	0	0	3.06778	2.49077	0	0	0	0	2.56665	2.45244	2.80697	0	0	0	0	0	0	0	0	0	0	0.182705	0	0
F2S4_170323_060_E01	133	#598069	Microglia Siglech	3	#808285	Non-Neuronal	3.79103	0	0	2.53678	0	0	0	0	0	0	2.93784	0	1.84485	2.18846	0	0	3.46478	0	0.257987	0	2.17689	0	0.959656	0	0	0	0	0	0	0	0	0	0	2.09735
F2S4_170323_060_F01	118	#665C47	Astro Aqp4	3	#808285	Non-Neuronal	0	0	0	2.45595	0	0	0	0	3.05152	0	2.84463	0	2.58898	0	0	0	0	1.47284	1.64783	0	2.01129	0	1.29269	0	0	0	2.65116	0.2494	0	0	0	1.46134	0	2.33892
F2S4_170323_060_G01	122	#6C8581	Oligo Serpinb1a	3	#808285	Non-Neuronal	0.322812	0	0	2.95655	0	0	0	0	0	0	2.90251	0	3.03856	2.69757	0	0	2.52095	1.66481	2.74831	0	2.64611	0	0	0	0	0	0	0	0	0	1.92565	0	1.7091	2.62277
F2S4_170406_004_C01	118	#665C47	Astro Aqp4	3	#808285	Non-Neuronal	0	0	0	2.09224	0	2.45929	0	0	2.74798	0	2.78532	2.48997	2.56638	2.18424	0	2.29954	2.72738	0	2.60417	2.0111	2.375	0	1.47187	0	0	0	0	0	0	0	0	2.68395	0	0
F2S4_170406_014_G01	118	#665C47	Astro Aqp4	3	#808285	Non-Neuronal	0.266445	0	0	1.94143	0	0	0	0	2.73819	0	0	0	3.14773	2.07452	0	0	2.41523	1.44872	2.57147	1.58279	1.80394	0	0	0	0	0	0	0	0	0	0	0	0	2.18834
F2S4_170526_001_E01	128	#665547	Peri Kcnj8	4	#8D1800	Endothelial	2.55464	0	0	2.12286	0	0	0	0	0	0	3.02958	0	2.37709	2.00393	0	0	0	0	0.329463	0	0.329463	0	2.89073	0	0.329463	0	0	0	0	0	0	0.329463	0	2.84673
F2S4_170706_001_B01	118	#665C47	Astro Aqp4	3	#808285	Non-Neuronal	2.38966	0	0	2.94545	0	0.230949	0	0	0	0	2.94958	0	2.9742	0	0	0	3.30107	0	2.86436	0	2.67781	0	1.08747	0	0	2.28631	0	0	0	0	1.54895	0	2.03783	0.230949
F2S4_170706_001_E01	118	#665C47	Astro Aqp4	3	#808285	Non-Neuronal	1.8903	0	0	2.34996	0	0	0	0	2.8791	0	2.13094	0	2.5144	1.23488	0.999385	2.21943	2.77558	1.42748	2.68309	1.79729	2.23485	0	2.09693	0	0.203864	2.22256	2.10313	0	0	0	1.55322	2.42256	1.56044	1.77603
F2S4_170803_001_B01	127	#74996B	VLMC Spp1 Col15a1	3	#808285	Non-Neuronal	2.53741	0	0	2.77184	1.72945	1.79881	0	0	0	0	2.52017	0	2.24151	2.51059	0	0	2.54769	0	3.0535	1.46038	2.42359	0	2.39386	0	0	0	2.71783	0	0	0	0	2.49796	2.21228	2.90299
F2S4_170803_001_C01	128	#665547	Peri Kcnj8	4	#8D1800	Endothelial	2.58968	0	0	2.73124	0	0	0	0	0	0	0.50558	0	2.49366	2.86084	3.18594	0	2.37427	0	0	0	2.46838	0	0	0	0	0	0	0	0	0	0	2.83922	0	0
F2S4_170803_001_G01	128	#665547	Peri Kcnj8	4	#8D1800	Endothelial	1.85372	0	0	2.10856	0	0	0	0	0	0	2.84683	0	2.62792	2.34469	0	0	2.70425	0.886779	2.70712	0	2.08923	0	0	0	0	1.84687	0	0	0	2.17502	0	2.15511	0	2.46305
F2S4_170803_002_F01	127	#74996B	VLMC Spp1 Col15a1	3	#808285	Non-Neuronal	2.12149	0	0	2.80435	2.59811	0	2.33069	0	0	0	2.57196	0	2.92965	1.87584	2.61471	2.63539	2.62278	0	3.02106	0	2.15561	0	2.60316	0	0	1.68911	2.21263	0	0	1.5438	1.41012	2.30488	1.50364	0
F2S4_170803_003_C01	128	#665547	Peri Kcnj8	4	#8D1800	Endothelial	0	0	0	2.42959	0	0	0	0	0	0	3.64129	0	1.94161	0	1.74046	0	0	0	0	0	2.18251	0	2.79162	0	0	0	0	0.499752	0	0	1.74046	0	2.18251	3.2523
F2S4_170803_005_C01	128	#665547	Peri Kcnj8	4	#8D1800	Endothelial	2.28452	0	0	2.78967	0	0	0	0	0	0	3.30762	0	2.68772	1.84359	0	2.30082	1.75951	0	0	0	2.83249	0	0	0	0	0	0	0	2.02772	0	0	2.23778	1.74055	2.49875
F2S4_170803_006_E01	128	#665547	Peri Kcnj8	4	#8D1800	Endothelial	2.49876	0	0.513395	0	2.36484	0	0	0	0	0	0	0	3.19412	2.68567	0	0	0	0	2.42048	0	2.65852	0	1.44926	0	0	0	0	0	0	0	0	0	0	0
F2S4_170803_007_D01	128	#665547	Peri Kcnj8	4	#8D1800	Endothelial	0.425516	0	0.425516	2.30248	0	0	0	0	0	0	3.15995	0	3.17806	2.21501	0	0	0	0	2.67688	0	2.52562	0	0	0	0	0	0	0	0	0	0	0	0	0.425516
F2S4_170803_010_A01	128	#665547	Peri Kcnj8	4	#8D1800	Endothelial	0	0	0	2.52478	0	0	0	0	0	0	2.49396	0	2.84695	2.62473	0	0	0	0	2.50965	0	2.86317	0	0	0	0	0	0	0	0	0	0	0	2.19077	3.10422
F2S4_170803_010_B01	128	#665547	Peri Kcnj8	4	#8D1800	Endothelial	0	0	0	2.62498	0	0	0	0	0	0	2.92463	0	2.72099	2.41521	2.03621	0	0.428576	1.58001	1.29026	0	2.14819	0	2.43444	0	0	0	0	0	0	0	1.59882	2.94168	0	2.78663
F2S4_170803_010_G01	128	#665547	Peri Kcnj8	4	#8D1800	Endothelial	2.98083	0	0	2.61969	0	0	0	0	0	0	3.01592	0	2.394	2.49869	2.61697	0	0	0	0	0	2.69187	0	2.53636	0	0	0	0	0	0	0	0	2.67551	2.45743	2.75771
F2S4_170803_011_A01	128	#665547	Peri Kcnj8	4	#8D1800	Endothelial	2.76009	0	0	2.47025	0	0	0	0	0	0	3.27389	0	2.87684	2.31171	0	0	2.82136	2.01606	3.09521	0	2.09345	0	1.17649	0	0	0	0	0	0	0	0	2.77054	2.13995	1.64932
F2S4_170803_011_C01	128	#665547	Peri Kcnj8	4	#8D1800	Endothelial	3.17461	0	0	2.49485	0	0	0	0	0	0	3.31795	0	2.54851	2.09899	0	0	0	1.99018	2.53696	0	2.86256	0	0	0	0	0	0	0	0	0	0.696936	1.3717	1.53325	2.30066
F2S4_170803_011_D01	128	#665547	Peri Kcnj8	4	#8D1800	Endothelial	0.53616	0	0	2.75495	0	0	0	0	0	0	3.02772	0	2.22825	2.52168	0	0	1.92352	0	2.92138	0	2.50546	0	0	0	0	2.56984	0	0	0	0	0	0	1.95982	0
F2S4_170803_011_G01	128	#665547	Peri Kcnj8	4	#8D1800	Endothelial	2.22315	0	0	2.25328	0	0	0	0	0	0	2.75094	0	3.05004	0	0	0	0	0	0	0	2.98586	0	0	0	0.477409	0	0	0	0	0	0	0	2.30363	2.09033
F2S4_170803_013_E01	129	#807059	SMC Acta2	4	#8D1800	Endothelial	2.57003	0	0	2.74675	0	0	0	0	0	0	2.5866	0	2.90873	2.34845	2.87124	0	0	1.88024	2.99121	0	2.84839	0	2.60823	0	0	0	0	0	0	0	0	0	2.15107	2.42559
F2S4_170803_014_A01	128	#665547	Peri Kcnj8	4	#8D1800	Endothelial	2.93535	0	0	2.92094	0	0	0	0	0	0	2.88992	0	2.82113	2.41118	2.92727	0	0	0	0	0	2.80396	0	0	0	0	0	0	0	0	2.85429	0	2.85355	0	3.21107
F2S4_170803_014_D01	128	#665547	Peri Kcnj8	4	#8D1800	Endothelial	2.71867	0	0	2.48623	2.59888	0	0	0	0	0	3.12449	0	2.84592	2.494	2.62925	0	0	0	0	0	2.61081	0	1.2454	0	0	0	0	1.79134	0	0	0	0.323534	1.90665	2.74452
F2S4_170803_015_A01	128	#665547	Peri Kcnj8	4	#8D1800	Endothelial	2.66561	0	0	2.58565	0	0	0	0	0	0	3.28717	0	2.88032	2.39551	0	0	0	0	2.92272	2.14252	2.66561	0	0	0	0	0	0	0	0	2.47291	2.54018	2.57693	0	2.91199
F2S4_170803_015_B01	128	#665547	Peri Kcnj8	4	#8D1800	Endothelial	2.97119	0	0.371956	2.13507	0	0	0	0	0	0	3.18716	0	3.0908	2.71136	0	0	0	0	0	0	2.97119	0	0	0	0	0	0	0	0	0	1.54246	2.71364	1.86216	0
F2S4_170803_017_E01	128	#665547	Peri Kcnj8	4	#8D1800	Endothelial	0	0	0	2.03671	0	0	0	0	0	0	3.28009	0	3.12549	2.60268	0	0	0	0	3.20163	0	2.95093	0	0	0	0	0	0	0	0	0	0	0	0	0
F2S4_170803_017_G01	128	#665547	Peri Kcnj8	4	#8D1800	Endothelial	2.99919	0	0	1.94999	0	0	0	0	0	0	3.31837	0	2.6441	2.8784	0	0	0	1.30443	0	0	2.68204	0	0.886774	0	0	0	0	0	0	2.23426	0	2.92084	1.93091	0.291782
F2S4_170803_017_H01	128	#665547	Peri Kcnj8	4	#8D1800	Endothelial	2.52305	0	0	2.17899	0	0	0	0	0	0	2.97538	0	2.84409	2.03702	0	0	2.69218	0	2.94099	0	2.60599	0	0.853727	0	0	0	0	0	0	0	0	2.53655	1.57798	2.15566
F2S4_170803_018_F01	128	#665547	Peri Kcnj8	4	#8D1800	Endothelial	2.31325	0	0	2.71856	0	0	0	0	0	0	3.18316	0	2.99932	2.54742	0	0	2.69753	0	2.96578	0	3.13869	0	2.66264	0	0	0	0	0	0	2.56238	2.1822	3.06466	1.026	1.59625
F2S4_170803_020_B01	128	#665547	Peri Kcnj8	4	#8D1800	Endothelial	2.70666	0	0	2.03942	0	0	0	0	0	0	3.15261	0	3.06175	2.41053	0	0	3.10855	1.52105	2.44345	0	2.6695	0	2.30387	0	0	0	0	0	0	0	0	2.56189	2.08002	0
F2S4_170803_021_B01	128	#665547	Peri Kcnj8	4	#8D1800	Endothelial	2.98925	0	0.363256	2.54602	0	0	0	0	0	0	3.1877	0	0.363256	2.34904	2.67746	0	2.57417	1.51047	2.09329	0	2.62955	0	1.6701	0	0	2.30632	0	0	0	2.72385	0	2.65291	1.8222	0
F2S4_170807_010_E01	128	#665547	Peri Kcnj8	4	#8D1800	Endothelial	2.88174	0	0	2.02993	0	0	0	0	0	0	3.2881	0	2.82283	2.26324	2.52423	0	0	0	1.07502	0	2.34256	0	2.7799	0	0	0	0	0	0	0	0	0	2.23322	3.14901
F2S4_170828_002_H01	127	#74996B	VLMC Spp1 Col15a1	3	#808285	Non-Neuronal	0	0	0	2.57812	0	1.95036	0	0	0	0	0	0.406087	2.92008	2.62994	0	0	2.11203	0.751434	0	0	2.4512	0	2.2711	0	0	1.72924	0	0	0	0	0.61222	2.2413	2.04478	0
F2S4_171120_001_A01	118	#665C47	Astro Aqp4	3	#808285	Non-Neuronal	0	0	0	0	0	0	0	0	2.62823	0	2.86443	0	2.52889	0	0	0	2.45341	0	2.63128	0	2.6205	0	0.84452	0	0	0	1.54957	0	1.68954	2.3704	0.739811	2.45111	0	0
F2S4_171120_001_B01	118	#665C47	Astro Aqp4	3	#808285	Non-Neuronal	2.2466	0	0	0	0	0	0	0	1.76383	0	3.00407	0	0	0	0	0	2.72325	0	2.50968	0	2.05569	0	0	0	0	0	0	0	0	0	0	2.51159	0	0
F2S4_171120_001_C01	118	#665C47	Astro Aqp4	3	#808285	Non-Neuronal	0	0	0	2.30526	0	0	0	0	2.84282	0	0	0	2.81749	2.15467	0	0	0	0	3.20513	0	2.22064	0	2.25471	0	0	0	0	0	0	0	0	3.15154	1.88198	0
F2S4_171120_001_D01	118	#665C47	Astro Aqp4	3	#808285	Non-Neuronal	0	0	0	2.5019	0	0	0	0	2.33589	0	3.05907	0	2.52053	1.50939	0	0	2.96192	0	2.42394	0	2.52506	0	0	0	2.49228	0	0	1.77922	0	0	0	0	0	0
F2S4_171120_001_E01	118	#665C47	Astro Aqp4	3	#808285	Non-Neuronal	2.11941	0	0	2.11489	0	0	0	0	1.91005	0	2.99995	1.99557	2.0916	2.18972	0	0	2.85211	0	2.94455	0	2.47966	0	0	0	0	0	0	0	0	2.3345	0	0	0	0
F2S4_171120_001_F01	118	#665C47	Astro Aqp4	3	#808285	Non-Neuronal	2.2554	0	0	2.37894	0	0	0	0	1.49528	0	3.04669	0	2.81646	0	0	0	2.9473	0	2.91723	1.91014	2.12701	0	0	0	2.06273	2.11402	0	0	0	0	2.22242	2.73828	2.55362	2.67666
F2S4_171120_001_G01	118	#665C47	Astro Aqp4	3	#808285	Non-Neuronal	2.17374	0	0	2.33962	2.49672	0	0	0	2.37116	0	2.79049	0	2.61434	0	0	0	2.84922	0	2.64315	1.3221	2.25755	1.74117	0.756217	0	2.5754	1.60002	0	1.74117	0	0	1.24219	0	1.21191	0
F2S4_171120_001_H01	118	#665C47	Astro Aqp4	3	#808285	Non-Neuronal	0	0	0	0	0	0	0	0	2.08822	0	3.1876	0	2.96478	2.00599	0	2.02082	0	0	2.50723	0	2.12985	0	1.7586	0	0	0	0.905514	0	0	0	0	0	2.04216	0.441097
F2S4_171120_002_A01	118	#665C47	Astro Aqp4	3	#808285	Non-Neuronal	2.15692	0	0	2.39866	0	0	0	0	0.339987	0	2.41085	1.2159	2.93972	2.05626	0	0	2.53537	0	2.83951	0	2.61484	0	0	0	2.44916	1.06779	0	0	0	0.339987	0	2.22651	0	2.32229
F2S4_171120_002_B01	118	#665C47	Astro Aqp4	3	#808285	Non-Neuronal	0	0	0	2.29993	0	0	0	0	2.75581	0	2.46501	0	2.94529	0	0	0	3.28776	0	2.7653	0	2.8695	0	0	0	1.08574	2.54464	0	1.44026	0	2.50285	0	0	0	2.65963
F2S4_171120_002_C01	118	#665C47	Astro Aqp4	3	#808285	Non-Neuronal	0	0	0	0	0	2.72393	0	0	0.987347	0	2.87101	0	2.94497	0	0	0	0	0	0	0	2.22153	0	2.77552	0	1.45622	0	0	0	2.7911	0	0	1.19093	0	0.987347
F2S4_171120_002_E01	118	#665C47	Astro Aqp4	3	#808285	Non-Neuronal	0	0	0	1.8977	0	0	0	0	3.05888	0	2.92222	0	2.77011	1.60213	0	0	3.15527	0	2.7669	0	2.68312	0	0.83115	0	0	0	0	0	2.53396	0	0.83115	0	0	0
F2S4_171120_002_F01	118	#665C47	Astro Aqp4	3	#808285	Non-Neuronal	0	0	0	2.52834	0.419272	0	0	0	2.83186	0	2.81489	0	3.06333	1.61958	0	0	3.11069	1.40463	2.57397	0	2.32708	0	0	0	0	0	2.62206	0	0	0	0	2.4431	1.63621	0
F2S4_171120_002_H01	118	#665C47	Astro Aqp4	3	#808285	Non-Neuronal	0	0	0	0	0	0	0	0	2.90037	0	2.5547	0	0.395173	2.44487	0	0	2.61657	0	3.09403	0	2.63933	0	0.395173	0	0	0	0	0	0	0	0	2.48676	2.0673	2.28432
F2S4_171120_003_A01	118	#665C47	Astro Aqp4	3	#808285	Non-Neuronal	2.60321	0	0	0	0	0	0	0	3.06986	0	1.59849	0	2.54289	0	0	0	3.12879	1.3742	0	0	2.95221	0	0	0	1.44202	0.368015	0	0	0	0	0	2.6202	0	0
F2S4_171120_003_B01	118	#665C47	Astro Aqp4	3	#808285	Non-Neuronal	2.36556	0	0	1.81996	0	0	0	0	2.40814	0	2.76635	1.84539	2.67307	1.90671	0	2.24944	0	1.0653	2.82103	0	1.89217	0	2.15152	0	2.89601	0	2.24944	0	0	0	0	0	0	0
F2S4_171120_003_C01	118	#665C47	Astro Aqp4	3	#808285	Non-Neuronal	0	0	0	0	0	0	0	0	0	0	2.54062	0	2.74427	2.09256	0	0	0	0	2.52865	0	2.25246	0	0	0	1.5885	0	0	0	0	0	1.86566	2.57286	2.10882	2.20824
F2S4_171120_003_D01	118	#665C47	Astro Aqp4	3	#808285	Non-Neuronal	0	0	0	1.94638	0	0	0	0	3.0436	0	2.96181	2.75511	0	0	0	0	0	1.4919	3.17891	2.01454	2.52572	0	0	0	0	1.67599	0	0	0	0	0	2.61054	1.07639	1.82307
F2S4_171120_003_E01	118	#665C47	Astro Aqp4	3	#808285	Non-Neuronal	0	0	0	0	1.99396	0	0	0	2.95162	0	2.83047	0	0	0	0	0	2.50021	1.20462	0.929886	0	2.32481	2.72151	0.929886	0	0	0	0	2.42131	0	0	0	0	0	0
F2S4_171120_003_F01	118	#665C47	Astro Aqp4	3	#808285	Non-Neuronal	2.49193	0	0	0	0	1.55752	0	0	2.41011	0	0.690206	0	2.46954	0	2.75321	2.48088	0.361735	1.65515	2.80748	0	2.73385	0	1.40995	0	0	0	0	0	0	0	0	2.77838	0	2.82893
F2S4_171120_003_G01	118	#665C47	Astro Aqp4	3	#808285	Non-Neuronal	0	0	0	2.55083	0	0	0	0	1.87709	0	2.77511	0.366926	2.46305	2.24286	0	0	3.02224	0	2.42576	0	2.16745	0	2.37292	0	0	0	0	0	0	0	1.41873	0	0	0.366926
F2S4_171120_003_H01	118	#665C47	Astro Aqp4	3	#808285	Non-Neuronal	0	0	0	1.89518	0	0	0	0	2.90271	0	2.49494	0.368692	2.9184	2.23593	0	0	2.88943	0	2.42667	0	2.35343	0	2.647	0	0	0	1.94407	0	0	0	0	2.48744	0	2.19714
F2S4_171120_004_A01	118	#665C47	Astro Aqp4	3	#808285	Non-Neuronal	0	0	0	2.00991	0	0	0	0	2.87462	0	2.74453	0	2.78657	2.12759	0	0	1.53513	0	3.22037	0	3.0694	0	2.25289	0	0	0	0	0	0	0	0.727687	0	0	0
F2S4_171120_004_B01	118	#665C47	Astro Aqp4	3	#808285	Non-Neuronal	0	0	0	1.78537	0	0	0	0	0	0	3.01915	0	3.22831	0.397962	0	0	3.3365	0	0.602087	1.27879	1.88934	0	2.18331	0	0	0	0	0	0	0	0	0	2.51986	0
F2S4_171120_004_C01	118	#665C47	Astro Aqp4	3	#808285	Non-Neuronal	0	0	0	2.47631	0	0	0	0	2.11094	0	2.45753	0	2.89648	2.10618	0	0	3.2765	0	3.18183	2.06608	2.63807	0	0	0	1.13576	0	0	2.26814	0	2.44235	0	0	1.50475	2.22665
F2S4_171120_004_D01	118	#665C47	Astro Aqp4	3	#808285	Non-Neuronal	1.01124	0	0	2.63517	0	0	0	0	0	0	2.75635	0	3.05048	0	0	0	0	0	2.91172	0	2.19991	0	1.54358	0	0	0	2.58239	1.2548	0	0	0.611443	0	0	0
F2S4_171120_004_E01	118	#665C47	Astro Aqp4	3	#808285	Non-Neuronal	2.65367	0	0	0	0	0	0	0	2.84191	0	2.50111	0	2.95961	2.38738	0	0	3.15132	0	0.381043	1.62048	2.50684	0	1.48425	0	2.1004	0	2.45657	0	0	0	0	0	0	2.27696
F2S4_171120_004_F01	118	#665C47	Astro Aqp4	3	#808285	Non-Neuronal	0	0	0	2.04269	2.24396	0	0	0	1.38963	0	2.62071	0	2.91906	0	0	0	2.87808	0	2.88283	0	1.89486	0	2.74395	0	0	0	0	1.81983	0	0	1.58394	0	1.45755	1.77176
F2S4_171120_004_G01	118	#665C47	Astro Aqp4	3	#808285	Non-Neuronal	0	0	0	2.10875	0	0	0	0	2.11331	0	2.86037	0	2.63018	0	0	0	2.73182	0	0	0	0.569584	0	0	0	1.12068	0	1.81109	0	0	0	1.90847	0	2.13542	0
F2S4_171120_004_H01	118	#665C47	Astro Aqp4	3	#808285	Non-Neuronal	0	0	0	0	0	0	0	0	3.00898	0	0	2.67472	2.16643	1.69126	0	0	2.28363	1.42155	2.7876	0.80255	2.33217	0	2.3996	0	0	0	0	0	0	2.65075	0	0	0	0
F2S4_171120_005_A01	118	#665C47	Astro Aqp4	3	#808285	Non-Neuronal	1.88268	0	0	2.11764	0	0	0	0	2.15563	0	2.79291	2.26525	2.84372	1.85243	0	0	3.09359	0	2.68924	0	2.19532	0	2.40839	0	0	0	0	0	1.33333	2.04363	0	0	1.85243	0
F2S4_171120_005_B01	118	#665C47	Astro Aqp4	3	#808285	Non-Neuronal	1.99497	0	0	2.22722	0	0	0	0	2.79694	0	3.04279	2.6218	2.78962	2.36808	0	2.26178	3.09884	1.26654	2.50142	0	2.79694	0	0	0	2.32	0	1.8506	0	0.438906	0	0	0	2.13764	0
F2S4_171120_005_C01	118	#665C47	Astro Aqp4	3	#808285	Non-Neuronal	0	0	0	0	3.0501	0	0	0	2.19332	0	2.50662	0	2.80966	2.18212	0	0	2.20961	0	0.475394	2.72087	2.41737	0	1.93696	0	2.02682	0	0	0	0	1.89507	0	0	0	0
F2S4_171120_005_D01	118	#665C47	Astro Aqp4	3	#808285	Non-Neuronal	0	0	0	0	0.474695	0	0	0	2.94232	0	2.6408	0	2.89673	2.1331	0	0	2.73116	0	0	0	0.474695	0	0	0	0	0	0	1.64965	0	0	0	2.60167	1.22702	0
F2S4_171120_005_E01	118	#665C47	Astro Aqp4	3	#808285	Non-Neuronal	0	0	0	2.59764	0	0	0	0	2.62975	0	2.56509	2.36125	2.82567	2.33335	0	0	2.36125	0	2.90397	0	2.19445	0	2.68761	0	0	0	0	0	0	0	2.08184	0	0	0
F2S4_171120_005_G01	118	#665C47	Astro Aqp4	3	#808285	Non-Neuronal	0	0	0	2.5136	0	0	0	0	2.99188	0	2.59017	0	3.0631	2.02887	2.54511	0	2.31191	1.40739	2.5136	0	2.64025	0	0	0	0	0	0	0	0	0.938115	0	2.58673	2.26021	0
F2S4_171120_005_H01	118	#665C47	Astro Aqp4	3	#808285	Non-Neuronal	0	0	0	2.15569	0	0	0	0	3.31658	0	2.88306	0	2.93603	1.86881	0	0	2.76811	0	2.66546	0	2.77225	0	0	0	0	0	0	0	0	0	0	2.18317	0	0
F2S4_171120_006_A01	118	#665C47	Astro Aqp4	3	#808285	Non-Neuronal	0	0	0	1.67383	0	0	0	0	2.50849	0	2.80383	0	2.94651	1.99528	0	0	2.78844	0	0	0	2.10883	0	0	0	0	0	0	0	0	0	0	2.27323	2.16169	2.69235
F2S4_171120_006_C01	118	#665C47	Astro Aqp4	3	#808285	Non-Neuronal	0	0	0	2.15791	0	0	0	0	3.00125	0	2.54695	0	3.08878	2.57461	0	0	1.38318	1.78421	2.57237	2.10201	0	0	1.41656	0	2.9489	0	0	0	1.59778	0	0	2.48846	1.59778	0
F2S4_171120_006_D01	118	#665C47	Astro Aqp4	3	#808285	Non-Neuronal	2.18505	0	0	2.70294	0	0	0	0	2.71774	0	2.87268	0	2.62753	1.81755	0	0	2.81506	0	2.97715	2.13796	2.67817	0	2.16475	0	0	0	0	0	1.12189	2.21383	0	2.88374	2.05273	2.53621
F2S4_171120_006_E01	118	#665C47	Astro Aqp4	3	#808285	Non-Neuronal	0	0	0	2.63929	0	2.24379	0	0	2.569	0	2.6688	0	0	2.36692	0	0	0	0	0.464702	0	1.85655	0	0	0	0	0	0	0	0	0	0	0	0	2.29308
F2S4_171120_006_G01	118	#665C47	Astro Aqp4	3	#808285	Non-Neuronal	0	0	0	2.40789	0	2.02273	0	0	3.23322	0	2.80794	0	2.81309	0	0	0	0	0	2.3088	0.938247	2.65392	0	0.748555	0	0.748555	0	2.26036	0	1.75017	2.49921	0	0	0	2.8282
F2S4_171120_006_H01	118	#665C47	Astro Aqp4	3	#808285	Non-Neuronal	0	0	0	2.45431	2.19055	0	0	0	0	0	2.39729	0	2.04652	2.44893	0	0	2.80978	0	1.79436	0	2.64392	0	0	0	0	0	2.30234	1.69919	0	0	0	0	1.61564	1.74255
F2S4_171120_009_B01	118	#665C47	Astro Aqp4	3	#808285	Non-Neuronal	0	0	0	2.67578	0	0	0	0	3.17553	0	2.52002	2.78338	3.02179	0	0	0	3.23859	0	0	0	2.75224	0	0	0	0	0	2.39709	0	0	2.72463	0	2.52782	2.21238	0
F2S4_171120_009_C01	118	#665C47	Astro Aqp4	3	#808285	Non-Neuronal	0	0	0	1.65722	0	0	0	0	2.60288	0	3.09506	0	3.01284	2.37094	1.80061	0	0	0	3.22797	2.2299	2.09819	0	0.394553	0	0	0	0	0	0	0	0	0	0	0
F2S4_171120_009_E01	118	#665C47	Astro Aqp4	3	#808285	Non-Neuronal	2.35575	0	0	2.41598	0	0	0	0	2.95512	0	2.63017	0	0.361353	0	0	0	2.89054	0	2.49308	0	2.31949	0	2.42877	0	0	0	0	0	1.65449	0	0	0	2.42028	0
F2S4_171120_009_F01	118	#665C47	Astro Aqp4	3	#808285	Non-Neuronal	0	0	0	2.88054	0	0	0	0	2.536	0	2.36054	0	2.85304	1.91678	1.92887	0	3.1636	0	2.01509	0	2.94079	0	2.38832	0	0	1.91678	1.89799	0	0	0	0	2.62732	1.69843	0
F2S4_171120_009_G01	118	#665C47	Astro Aqp4	3	#808285	Non-Neuronal	0	0	0	0	0	0	0	0	0	0	2.61849	0	2.20774	0	0	0	1.44924	0	3.03152	2.67181	2.54413	1.29005	1.23132	0	2.45247	0	2.51567	0	0	0.348964	0	2.50743	0.348964	0
F2S4_171120_009_H01	118	#665C47	Astro Aqp4	3	#808285	Non-Neuronal	0.341339	0	0	2.40524	0	0	0	0	2.81426	0	2.39072	0	2.177	2.78632	0	0	1.27687	0	3.09624	1.99542	2.5099	0	1.37467	0	0	0	2.35097	0	0	0	2.16297	1.11211	0	0
F2S4_171120_010_A01	118	#665C47	Astro Aqp4	3	#808285	Non-Neuronal	0	0	0	2.3495	0	0	0	0	2.58236	0	2.94572	0	2.97787	1.48325	0	2.28536	0	0	3.168	0	2.74025	0	2.18176	0	0	0	0	1.50114	0	2.29108	0	0	0	1.8688
F2S4_171120_010_B01	118	#665C47	Astro Aqp4	3	#808285	Non-Neuronal	0	0	0	0	0	0	0	0	2.6915	0	2.58474	0	2.55848	0	0	0	1.8871	0	2.85294	0	2.57345	0	0.905639	0	2.58633	0	0	0	0	0	0	0	2.26866	0
F2S4_171120_010_C01	118	#665C47	Astro Aqp4	3	#808285	Non-Neuronal	2.53109	0	0	2.35651	0	0	0	0	1.76783	0	2.85622	0	2.84274	0	0	0	0	1.90596	2.35912	0	2.63642	0	1.66512	0	1.74702	0	0	0	0	2.4198	0	0	1.62466	0.374973
F2S4_171120_010_F01	118	#665C47	Astro Aqp4	3	#808285	Non-Neuronal	0	0	0	2.40942	0	0	0	0	1.19793	0	2.90856	0.514928	2.9542	2.24833	0	0	0	0	2.78461	0	2.75092	0	0	0	0	0	2.46358	1.69781	1.35396	0	0	0	1.8743	0
F2S4_171120_010_H01	118	#665C47	Astro Aqp4	3	#808285	Non-Neuronal	1.80801	0	0	2.29632	0	0	0	0	2.65635	0	3.11368	0	2.89218	0	0	0	3.39429	0	2.78635	0	2.42836	0	2.20188	0	0	0	0.52418	0	0	0	0	0.904716	1.82356	0
F2S4_171120_011_E01	118	#665C47	Astro Aqp4	3	#808285	Non-Neuronal	0	0	0	2.33241	2.62467	0	0	0	2.89184	0	2.4428	0	2.3385	0	0	0	2.1664	1.65332	3.27761	0	0	0	1.31658	0	0	0	0	0	1.72098	0	0	0	0	0
F2S4_171120_011_F01	118	#665C47	Astro Aqp4	3	#808285	Non-Neuronal	2.52487	0	0	2.26615	0	0	0	0	2.55643	0	2.96378	0	2.80699	2.42679	0	0	2.8442	1.45538	0	1.53493	2.76113	0	1.85117	0	0	0	0	0	0	0	0	0	0	0
F2S4_171120_011_G01	118	#665C47	Astro Aqp4	3	#808285	Non-Neuronal	0	0	0	2.22071	0	0	0	0	2.88009	0	3.26554	0	3.16311	2.1631	0	0	0	0	2.908	0	0.554095	0	2.28048	0	0	0	0	0	0	0	0	2.67052	0	0
F2S4_171120_011_H01	118	#665C47	Astro Aqp4	3	#808285	Non-Neuronal	0	0	0	2.13482	0	0	0	0	2.46255	0	0	0	2.72261	1.49825	2.3264	0	2.98162	1.61547	2.71857	0	2.52693	0	1.7749	0	0	0	0	2.13092	0	0	0	0	2.2872	0
F2S4_171120_012_C01	118	#665C47	Astro Aqp4	3	#808285	Non-Neuronal	0	0	0	2.10289	0	0	0	0	2.78245	0	3.09009	0	3.00959	1.92142	0	2.37287	2.9521	1.41052	2.33731	0	2.42802	0	0	0	2.08486	0	0	0	0	0	0	0	0	0
F2S4_171120_012_D01	118	#665C47	Astro Aqp4	3	#808285	Non-Neuronal	0	0	0	2.345	0	2.53364	0	0	1.9308	0	2.34735	0	2.86721	0	0	0	3.13359	1.41965	2.86365	1.02657	2.47648	0	0	0	2.5019	0	0	0.343186	0	0	0	2.31568	1.78671	0.343186
F2S4_171120_012_E01	118	#665C47	Astro Aqp4	3	#808285	Non-Neuronal	0	0	0	1.84958	1.42762	0	0	0	1.97064	0	2.69871	0	2.06521	0.400676	0	0	2.57097	0	2.56742	0	0	0	0	0	0	0	0	0	0	0	0	0	0	0
F2S4_171120_012_G01	118	#665C47	Astro Aqp4	3	#808285	Non-Neuronal	0	0	0	2.04608	0	0	0	0	2.83982	0	3.13309	0	2.74307	1.99109	0	0	3.18691	0	2.47604	0	2.12461	0	1.73153	0	0	0	0	0	0	2.76334	0	0	0	2.41428
F2S4_171120_013_F01	118	#665C47	Astro Aqp4	3	#808285	Non-Neuronal	0	0	0	2.24947	1.14867	0	0	0	0	0	2.23317	0	2.27029	0	2.21045	0	3.11192	0	2.33179	0	2.05835	0	2.34052	0	0	0	0	1.14867	0	0	0	0	0	0
F2S4_171120_013_G01	118	#665C47	Astro Aqp4	3	#808285	Non-Neuronal	2.24036	0	0	2.33677	0	0	0	0	0.680534	0	2.6368	1.66037	2.89331	0	0	0	3.28583	1.51659	2.63983	0	2.52072	0	2.2853	0	1.68826	0	2.5852	0	0	0	0	0	1.84521	0
F2S4_171120_013_H01	118	#665C47	Astro Aqp4	3	#808285	Non-Neuronal	2.60279	0	0	2.36222	1.59112	0	0	0	2.84345	0	3.04456	0	2.67599	2.18126	2.54152	0	3.07651	1.50037	0	0	2.91959	0	0.670055	0	2.167	0	2.41032	0	0	0	0	0	2.2783	0.853083
F2S4_171120_014_C01	118	#665C47	Astro Aqp4	3	#808285	Non-Neuronal	0	0	0	2.51874	0	0	0	0	2.78138	0	2.79976	0	2.82254	2.03387	0	0	2.58254	0	3.09364	0	2.2051	0	2.67684	0	0	0	0	0	0	0	0	0	0	2.43568
F2S4_171120_014_D01	118	#665C47	Astro Aqp4	3	#808285	Non-Neuronal	0	0	0	2.77434	0	0	0	0	0	0	2.5142	0	1.94245	0	1.0534	0	0	0	2.39874	2.45562	2.46185	1.44407	2.18628	0	0	0	0	2.34959	0	0	0	1.92151	0	0
F2S4_171120_014_E01	118	#665C47	Astro Aqp4	3	#808285	Non-Neuronal	2.56729	0	0	2.38467	0	0	0	0	1.67109	0	2.54487	0	2.28869	0	0	0	0	0	0	0	2.44996	0	1.49961	0	0	0	0	0	0	0	0	0	2.70492	2.39625
F2S4_171120_014_F01	118	#665C47	Astro Aqp4	3	#808285	Non-Neuronal	0	0	0	2.14918	0	0	0	0	2.65733	0	0	2.27334	3.2402	0	0	0	0	1.67817	2.89752	0	2.56933	0	1.36586	0	1.08314	0	0	0	0	0	0	0	1.81583	0
F2S4_171120_015_A01	118	#665C47	Astro Aqp4	3	#808285	Non-Neuronal	0	0	0	2.42186	0	2.71294	0	0	2.8274	0	3.20522	0	2.90742	0	0	0	3.08254	1.85233	0	0	2.70737	0	2.56752	0	2.63869	1.72942	0	0	0	0	0	2.75004	2.39201	2.62985
F2S4_171120_015_C01	118	#665C47	Astro Aqp4	3	#808285	Non-Neuronal	2.77099	0	0	2.0903	2.15054	2.62246	0	0	0.851602	0	0	0	3.23623	0	0	0	2.62087	0	2.98621	0	2.66462	0	1.69762	0	2.27236	0	0	0	0	0	0	0	2.51944	2.03892
F2S4_171120_015_D01	118	#665C47	Astro Aqp4	3	#808285	Non-Neuronal	0	0	0	0	0	0	0	0	2.11796	0	0	0	3.28584	0	0	0	3.32791	0	0	0	3.02662	0	0	0	0	0	0	0	0	0	0	0.516447	2.12545	0
F2S4_171120_015_F01	118	#665C47	Astro Aqp4	3	#808285	Non-Neuronal	2.67268	0	0	1.85485	0	0	0	0	2.83312	0	2.74927	0	3.21112	1.80879	0	0	0	0	2.74366	0	2.51969	0	1.18769	0	2.94861	1.85485	2.24737	0	0	0	0	2.51206	0	0
F2S4_171120_015_G01	118	#665C47	Astro Aqp4	3	#808285	Non-Neuronal	0	0	0	2.6454	0	0	0	0	3.06886	0	2.84461	1.49012	0	2.13905	0	0	3.13594	0	0	0	2.56541	0	0	0	0	0	0	0	0	0	0	0	1.77169	2.79875
F2S4_171120_015_H01	118	#665C47	Astro Aqp4	3	#808285	Non-Neuronal	0	0	0	2.54962	0	0	0	0	2.80449	0	2.3913	0	2.84436	2.32942	0	0	2.88897	1.61115	0	0	2.97919	0	2.42758	0	0	0	0	0	0	0	0	2.84815	1.21286	2.76288
F2S4_171120_016_A01	118	#665C47	Astro Aqp4	3	#808285	Non-Neuronal	0	0	0	2.38425	0	0	0	0	3.45523	0	0	0	2.77419	2.19163	0	0	0	1.48436	0	0	2.49368	0	2.34521	0	0	0	1.99968	0	0	0	0	0	0.650413	2.46105
F2S4_171120_016_B01	118	#665C47	Astro Aqp4	3	#808285	Non-Neuronal	0	0	0	2.51955	0	0	0	0	2.36094	0	2.49359	0	2.68982	2.16901	2.49602	0	2.65436	1.82806	0	2.35429	2.70203	0	2.01683	0	0	0	2.07155	0	0	0	0	0	0	2.5397
F2S4_171120_016_C01	118	#665C47	Astro Aqp4	3	#808285	Non-Neuronal	0	0	0	1.98253	1.75838	0	0	0	1.12458	0	2.64625	0	2.46978	1.99042	0	0	2.31956	0	2.53466	1.65329	2.78287	0	2.94851	0	0	2.55855	2.46718	1.686	1.63596	0	0	0	0	0
F2S4_171120_016_E01	118	#665C47	Astro Aqp4	3	#808285	Non-Neuronal	0	0	0	0	0	0	0	0	2.55207	0	3.12972	0	2.78102	1.97017	0	0	3.31368	0	0	0	3.03611	0	1.64902	0	0	0	0	0	0	2.46543	0	0	0	3.16008
F2S4_171120_016_F01	118	#665C47	Astro Aqp4	3	#808285	Non-Neuronal	0	0	0	2.56119	0	0	0	0	2.79702	0	2.83569	0.418443	2.77632	0	0	0	0	0	2.53529	0	0	0	0	0	0	0	0	0	1.56418	2.6437	0	2.61903	0	0
F2S4_171120_016_G01	118	#665C47	Astro Aqp4	3	#808285	Non-Neuronal	0	0	0	2.25838	0	2.1429	0	0	3.26333	0	3.19945	0	2.34029	0	0	0	2.6046	0	2.40113	0	2.69585	0	1.29696	0	1.85461	0	0	0	0	0	0	2.54093	0.946396	0
F2S4_171120_016_H01	118	#665C47	Astro Aqp4	3	#808285	Non-Neuronal	2.23977	0	0	2.61601	0	0	0	0	2.79474	0	2.80881	0	2.56857	2.28442	0	0	2.65056	0	2.89907	0	2.63707	2.58239	1.89176	0	2.65056	0	2.48479	0	1.80796	0	0	0	2.00073	1.79625
F2S4_171120_017_A01	118	#665C47	Astro Aqp4	3	#808285	Non-Neuronal	2.15767	0	0	2.02811	0	0	0	0	1.9631	0	3.03123	0	2.70198	2.07797	0	0	0	0	2.72533	0	2.45153	0	0	0	0	0	2.33833	0	1.55906	2.3872	0	0	0.925138	0
F2S4_171120_017_C01	118	#665C47	Astro Aqp4	3	#808285	Non-Neuronal	2.27859	0	0	2.08108	0	0	0	0	3.2743	0	2.98966	0	2.28297	0	0	0	2.2321	0	0	0	1.91365	2.63438	0.940082	0	0	0	2.55579	0	0	0	0	2.51172	1.85932	0
F2S4_171120_017_D01	118	#665C47	Astro Aqp4	3	#808285	Non-Neuronal	2.20092	0	0	2.70812	0	0	0	0	3.2034	0	2.73784	0	2.60791	2.08283	0	0	2.31493	2.29728	0	0	2.91541	0	0.964736	0	2.34174	0	2.41896	0	1.52995	2.50951	0	0	0	2.83875
F2S4_171120_017_G01	118	#665C47	Astro Aqp4	3	#808285	Non-Neuronal	2.00158	0	0	2.35941	0	0	0	0	2.86343	0	2.58684	0	2.89074	0.402894	0	0	1.49932	0	2.50582	0	2.59704	0	2.29374	0	2.01461	0	0	0	0	0	0.608244	0	1.91392	1.51986
F2S4_171120_017_H01	118	#665C47	Astro Aqp4	3	#808285	Non-Neuronal	0	0	0	2.13106	0	0	0	0	3.22543	0	2.83376	0	3.05263	1.87309	0	0	2.52918	1.67056	2.40885	0	2.70061	0	0	0	1.81184	0	0	0	0	0	0	0	1.74051	2.31991
F2S4_171120_018_C01	118	#665C47	Astro Aqp4	3	#808285	Non-Neuronal	0	0	0	2.29327	0	2.65708	0	0	3.39315	0	2.54168	0	2.87185	2.39377	0	0	3.16723	0	0	0	2.16773	0	0	0	2.25089	0	0	0	0	0	0	0	1.59507	0
F2S4_171120_018_F01	118	#665C47	Astro Aqp4	3	#808285	Non-Neuronal	0	0	0	2.60254	0	0	0	0	0	0	0	0	2.46617	0	0	0	0	1.77073	3.01967	0	2.50064	0	0	0	0	0	0	0	0.765818	0	0	0	1.85654	0
F2S4_171120_018_H01	118	#665C47	Astro Aqp4	3	#808285	Non-Neuronal	2.29473	0	0	2.57328	0	0	0	0	3.32376	0	2.44929	0	2.76716	2.54002	0.389651	0	3.08215	0	0	0.72902	2.73002	0	1.51799	0	0	2.20235	0	0	0	0	0	0	0	2.70711
F2S4_171120_019_A01	118	#665C47	Astro Aqp4	3	#808285	Non-Neuronal	0	0	0	2.52369	2.53142	0	0	0	1.39788	0	2.66972	2.65267	2.04916	2.19997	0	0	2.90977	0	2.77116	0	2.21213	0	2.32422	0	1.2787	0	2.15223	0	0	0	0	0	0	0
F2S4_171120_019_B01	118	#665C47	Astro Aqp4	3	#808285	Non-Neuronal	2.26402	0	0	2.99525	0	0	0	0	2.39513	0	2.75301	0	2.56896	2.46469	0	0	2.90269	0	2.40261	0	2.4937	0	2.53387	0	0.983617	0	0	0	0	0	0	2.59353	1.9481	0
F2S4_171120_019_C01	118	#665C47	Astro Aqp4	3	#808285	Non-Neuronal	2.32301	0	0	2.51779	0	0	0	0	2.93264	0	2.20344	0	2.53198	2.39568	1.75671	0	2.59524	0	2.56557	0	2.62017	0	2.56718	0	2.78921	0	0	0	0	0	0	2.61153	0	0
F2S4_171120_019_D01	118	#665C47	Astro Aqp4	3	#808285	Non-Neuronal	0	0	0	2.60979	0	0	0	0	1.8143	0	2.55765	0	3.09942	0	0	0	3.09261	1.36797	2.57574	0	2.8818	0	2.14793	0	1.55504	0	2.32586	2.30535	0	0	2.41833	2.32586	1.7953	2.54918
F2S4_171120_019_F01	118	#665C47	Astro Aqp4	3	#808285	Non-Neuronal	0	0	0	2.30107	0	0	2.82301	0	2.74806	0	0	0	2.58643	0	0	0	2.87332	1.73014	2.38417	0	2.81955	0	1.15168	0	0	0	1.88899	0	0	0	0	0	1.6733	0
F2S4_171120_019_G01	118	#665C47	Astro Aqp4	3	#808285	Non-Neuronal	2.31536	0	0	2.64502	0	0	0	0	3.18031	0	2.91096	0	2.35244	0	0.404003	2.32176	2.63893	0	2.54722	0	2.50971	0	2.33737	0	0	0	0	0	0	0	0	0	0	2.04137
F2S4_171120_019_H01	118	#665C47	Astro Aqp4	3	#808285	Non-Neuronal	0	0	0	2.50884	0	0	0	0	2.55916	0	2.64359	0	2.50055	1.83309	0	0	2.80194	1.37788	2.34354	0	2.72059	0	1.00641	0	0	2.03236	1.55715	0	0	0	0	0	0	2.58229
F2S4_171120_020_A01	118	#665C47	Astro Aqp4	3	#808285	Non-Neuronal	0	0	0	2.09398	2.70959	0	0	0	0	0	2.93133	0	2.43149	2.77868	0	0	2.95775	0	0	0	2.59317	0	1.903	0	0	0	0	0	0	0	0	2.62326	0	0
F2S4_171120_020_B01	118	#665C47	Astro Aqp4	3	#808285	Non-Neuronal	0	0	0	2.56468	0	0	0	0	2.61971	0	0	0	2.7478	0	0	0	0	1.41144	2.52872	0	1.88551	0	0.730348	0	0	0	2.4598	0	0	0	1.96786	2.54527	0	0
F2S4_171120_020_D01	118	#665C47	Astro Aqp4	3	#808285	Non-Neuronal	0	0	0	1.87185	0	0	0	0	2.55274	0	2.09879	0	2.38968	1.7299	0	0	3.23407	0	1.2296	0	2.38685	0	1.7901	0	2.4378	0	0	0	1.6119	0	0	0	1.39708	2.47186
F2S4_171120_020_F01	118	#665C47	Astro Aqp4	3	#808285	Non-Neuronal	2.07903	0	0	2.35422	0	0	0	0	2.94066	0	2.66043	0	3.10468	1.86534	0	0	2.61376	0	2.6769	0	2.8561	0	0.624808	0	0	0	0	0	0	0	0	0	1.64742	1.30729
F2S4_171120_020_H01	118	#665C47	Astro Aqp4	3	#808285	Non-Neuronal	0	0	0	2.74447	0	0	0	0	0	0	2.41487	0	2.85013	2.14238	0	0	1.90986	0	3.00606	0	2.56161	0	2.48266	0	0	0	0	0	0	0	1.31567	0	2.17434	0.848624
F2S4_171120_023_A01	118	#665C47	Astro Aqp4	3	#808285	Non-Neuronal	0	0	0	0.559251	2.64015	0	0	0	0	0	2.80355	0	2.80444	0	0	1.56147	3.02152	0	3.2043	0	2.41635	0	0	0	0	0	0	2.28463	0	0	0	0	0	0
F2S4_171120_023_B01	118	#665C47	Astro Aqp4	3	#808285	Non-Neuronal	0	0	0	2.22865	0	0	0	0	0	0	2.73663	0	2.95115	1.98136	0	0	3.00511	0	2.57265	0	2.43215	0	0.868702	0	0	0	2.06857	0	0	0	2.43725	2.33048	1.51792	0.314955
F2S4_171120_023_C01	118	#665C47	Astro Aqp4	3	#808285	Non-Neuronal	0	0	0	2.09382	2.53561	2.44405	0	0	0	0	2.46102	0	2.62026	2.17241	0	0	3.08892	0	3.00718	1.84474	2.13879	0	0	0	0.923594	0	2.4931	0	0	0	0	0.348524	2.07623	0
F2S4_171120_023_D01	118	#665C47	Astro Aqp4	3	#808285	Non-Neuronal	0	0	0	2.36375	0	0	0	0	0.782229	0	2.74207	0	2.68702	1.32688	0	0	2.32657	0	2.748	1.41967	2.38463	0	1.352	0	0	0	0.354905	0	0	0	1.59022	2.32657	0.680557	2.09652
F2S4_171120_023_E01	118	#665C47	Astro Aqp4	3	#808285	Non-Neuronal	0	0	0	0	0	0	0	0	0	0	2.7911	0	3.05718	1.95875	0	0	3.2282	0	2.34477	0.406652	2.58784	0	0	0	0	0	2.56827	0	0	0	0	2.44251	1.84991	0
F2S4_171120_023_F01	118	#665C47	Astro Aqp4	3	#808285	Non-Neuronal	0	0	0	0.332403	0	0	0	0	1.95754	0	2.91849	0	2.39281	0	2.64707	0	3.02246	0	3.23232	0	0	0	0	0	0	0	2.08949	0	0	0	0	2.53026	0	0
F2S4_171120_023_G01	118	#665C47	Astro Aqp4	3	#808285	Non-Neuronal	0	0	0	2.02961	0	0	0	0	2.80019	0	2.87617	0	2.8463	1.78342	0	0	3.10004	0	2.76528	0	2.33108	0	0	0	0	0	2.60823	0	0	0	2.00936	2.7132	1.49798	0
F2S4_171120_023_H01	118	#665C47	Astro Aqp4	3	#808285	Non-Neuronal	2.23434	0	0	2.2701	0	2.30841	0	0	2.16729	0	2.71184	0	2.43477	1.57755	0	0	2.89348	0	2.38723	0	2.73988	2.40646	0	0	0	0	0	0	1.60486	0	0	2.53565	2.2585	2.85506
F2S4_171120_024_A01	118	#665C47	Astro Aqp4	3	#808285	Non-Neuronal	0	0	0	2.45054	0	0	0	0	2.35294	0	2.50081	0	3.04335	0	0	0	2.76134	1.62895	3.03344	0	2.49121	0	1.81102	0	0	0	0	0	0	0.968992	1.89525	2.58354	1.80162	2.71521
F2S4_171120_024_B01	118	#665C47	Astro Aqp4	3	#808285	Non-Neuronal	0	0	0	0	0	0	0	0	3.18905	0	0.38656	0	2.50661	2.41149	0	0	2.62485	0	0	0	2.60053	0	1.59938	0	0	0	0	0	0	0	0	2.8947	1.76651	0
F2S4_171120_024_C01	118	#665C47	Astro Aqp4	3	#808285	Non-Neuronal	2.12867	0	0	2.73034	0	0	0	0	0	0	2.68309	0	2.45957	1.77031	0	0	3.15004	0	0	0	2.54851	0	2.04359	0	2.56371	0	2.63642	0	0	0	0	2.47449	1.78849	2.92085
F2S4_171120_024_D01	118	#665C47	Astro Aqp4	3	#808285	Non-Neuronal	0.375993	0	0	2.62985	2.83236	0	0	0	0	0	2.79948	0	3.13962	0	0	0	0	0	3.19605	2.60681	2.46873	0	2.25524	0	0.574449	0	0	0	0	0	0	0	0	0
F2S4_171120_024_E01	118	#665C47	Astro Aqp4	3	#808285	Non-Neuronal	2.18996	0	0	2.54599	0	0	0	0	0	0	2.79646	0	2.76168	0	0	2.47621	0	0	2.05967	0	2.6299	0	1.82322	0	0.368841	0	0	0	0	0	0	0	0	0
F2S4_171120_024_F01	118	#665C47	Astro Aqp4	3	#808285	Non-Neuronal	0	0	0	2.11512	0	0	0	0	0	0	0	0	2.67398	0	0	0	2.18966	0	0	0	2.83374	0	1.73794	0	0	0	2.50942	0	0	0	0	0	0	0
F2S4_171120_024_G01	118	#665C47	Astro Aqp4	3	#808285	Non-Neuronal	0	0	0	2.49948	0	2.57843	0	0	1.65282	0	2.39467	1.37243	2.48452	0	0	0	2.77973	0	2.67674	2.40697	2.20789	0	1.51955	0	1.39379	0	2.34633	0	0	2.344	0	0	2.15707	0.340068
F2S4_171120_024_H01	118	#665C47	Astro Aqp4	3	#808285	Non-Neuronal	2.49007	0	0	2.68256	0	0	0	0	2.30951	0	2.66912	0	2.69021	0	0	0	0	0	2.42135	0	2.14727	0	1.07928	0	0	1.77584	0	0	0	0	0	2.47788	2.03085	0.346849
F2S4_171120_025_A01	118	#665C47	Astro Aqp4	3	#808285	Non-Neuronal	2.4606	0	0	2.6234	0	0	0	0	0	0	3.07373	0	2.71	0	0	0	0	0	2.62935	2.18637	2.49947	0.940825	1.21623	0	0	0	0	0	0	2.67775	0	0	0	0
F2S4_171120_025_B01	118	#665C47	Astro Aqp4	3	#808285	Non-Neuronal	1.94356	0	0	2.49846	0	0	0	0	2.64481	0	2.72019	0	2.91642	2.34631	0	0	3.14646	1.13441	2.86533	0.411353	2.57413	0	1.13441	0	1.08095	1.94356	2.52789	0	0	0	0	0	1.5128	0
F2S4_171120_025_C01	118	#665C47	Astro Aqp4	3	#808285	Non-Neuronal	0	0	0	2.72053	0	0	0	0	0	0	2.42992	0	2.927	0	0	0	2.76308	0	2.67335	0	2.9607	0	0.906081	0	2.13799	0	2.67766	0	0	0	0	0	1.79341	2.35106
F2S4_171120_025_D01	118	#665C47	Astro Aqp4	3	#808285	Non-Neuronal	2.70384	0	0	2.06361	0	0	0	0	2.58592	0	2.60204	0	2.89453	0	0	0	3.11937	0	2.95471	0	3.00523	0	2.3195	0	0	1.90934	0	2.83977	0	0	0	0	0	0
F2S4_171120_025_E01	118	#665C47	Astro Aqp4	3	#808285	Non-Neuronal	0	0	0	1.98172	0	0	0	0	2.92575	0	0	0	2.71898	1.2804	0	0	3.30869	0	2.35871	0	2.48029	0	1.9462	0	0	0	0.398981	0	0	0	0	0	1.73005	0
F2S4_171120_025_F01	118	#665C47	Astro Aqp4	3	#808285	Non-Neuronal	0	0	0	2.44326	0	0	0	0	0	0	2.77528	0	2.56971	2.13616	0	0	2.42781	0	2.85571	0	2.25253	0	0	0	0	0	0	0	1.8955	0	0	0	1.7724	2.7846
F2S4_171120_025_G01	118	#665C47	Astro Aqp4	3	#808285	Non-Neuronal	0	0	0	2.39687	0	0	0	0	0.842688	0	2.69004	0	2.87514	2.15254	0	0	0	2.42695	2.58714	0	2.70561	0	0	0	1.03884	0	0	0	0	0	0	0	0	3.07017
F2S4_171120_026_B01	118	#665C47	Astro Aqp4	3	#808285	Non-Neuronal	1.81375	0	0	2.57328	0	0	0	0	1.4257	0	3.20176	0	2.5495	0.384715	0	0	2.60668	0	2.795	0	2.31728	2.41318	0.826079	0	2.85513	0	2.24267	0	0	0	2.10662	0	0	2.54775
F2S4_171120_026_C01	118	#665C47	Astro Aqp4	3	#808285	Non-Neuronal	0	0	0	2.56054	0	0	0	0	0.400859	0	3.05407	0	2.19234	2.10346	0	0	3.02084	0	3.13791	0	2.4962	0	2.63374	0	2.04224	0	0.605706	0	0	0	0	0	1.91059	0
F2S4_171120_026_D01	118	#665C47	Astro Aqp4	3	#808285	Non-Neuronal	0	0	0	2.07863	0	0	0	0	0.723924	0	2.56534	0	2.80593	2.33402	0	0	2.69586	0	2.29798	0	2.04633	0	2.07341	0	1.40385	0	0	0	0	0	0	2.32822	0	0
F2S4_171120_026_E01	118	#665C47	Astro Aqp4	3	#808285	Non-Neuronal	0	0	0	2.37658	0	0	0	0	2.8657	0	2.68739	0	2.66253	0	0	0	2.94428	1.89692	2.87658	0	1.92402	0	0.7838	0	0	0	2.33102	0	0	0	1.49792	0	1.71421	2.01813
F2S4_171120_026_F01	118	#665C47	Astro Aqp4	3	#808285	Non-Neuronal	0	0	0	2.10137	0	0	0	0	1.3348	0	2.46894	0.412621	2.63267	2.50485	0	0	0	0	0.412621	2.61964	2.17171	0	0.865923	0	0.412621	0	0	1.55499	0	2.72095	0	0	0	2.44489
F2S4_171120_026_G01	118	#665C47	Astro Aqp4	3	#808285	Non-Neuronal	0	0	0	0	0	0	0	0	3.14905	0	0	0	3.13299	1.82832	0	0	0.461745	1.43995	3.01537	0	2.38336	0	2.71317	0	3.21754	0	0	2.66608	1.71752	1.40898	1.9726	0	0	0
F2S4_171120_026_H01	118	#665C47	Astro Aqp4	3	#808285	Non-Neuronal	0	0	0	2.68991	0	0	0	0	0	0	2.49129	0	2.36404	2.67924	0	0	2.56218	0	0.598863	1.96192	2.68594	0	0	0	0	0	0	2.47647	1.5813	2.48288	0	1.88509	2.20795	1.52734
F2S4_171120_027_A01	118	#665C47	Astro Aqp4	3	#808285	Non-Neuronal	0	0	0	2.58909	0	0	0	0	2.76616	0	2.30504	0	2.52603	0	0	0	0	2.01762	2.8217	0	2.47386	0	1.13566	0	0.664548	0	1.00206	0	0	0	0	0	0	0
F2S4_171120_027_B01	118	#665C47	Astro Aqp4	3	#808285	Non-Neuronal	0	0	0	2.67379	0	0	0	0	2.72079	0	2.64178	0	2.87857	0	0	0	2.74537	0	1.92474	0	2.40343	0	2.80976	0	0.390527	0	1.41129	0	0	2.25246	0	2.33593	1.43518	2.13534
F2S4_171120_027_C01	118	#665C47	Astro Aqp4	3	#808285	Non-Neuronal	2.08582	0	0	2.73865	0	0	0	0	2.87346	0	1.00275	0	2.77976	0	0	0	0	0	3.12642	2.40359	2.70505	0	2.11194	0	0	0	0	0	2.41129	0	0	0	1.76644	0
F2S4_171120_027_D01	118	#665C47	Astro Aqp4	3	#808285	Non-Neuronal	0	0	0	2.67253	0	0	0	0	2.62433	0	0	0	2.39151	2.43864	0	0	2.35585	0	0	0	2.53131	0	1.88588	0	0	0	0	0	0	0	1.7595	0	0.798979	2.72755
F2S4_171120_027_F01	118	#665C47	Astro Aqp4	3	#808285	Non-Neuronal	0	0	0	1.88944	0	2.6281	0	0	1.446	0	2.3811	2.29662	2.52378	2.57088	2.30585	0	2.98181	0	2.77949	0	2.53108	0	0	0	2.82783	0	2.284	0	0	0	1.4675	0	1.60937	0
F2S4_171120_027_G01	118	#665C47	Astro Aqp4	3	#808285	Non-Neuronal	0	0	0	0	0	0	0	0	2.50664	0	2.5704	0	3.10349	2.45825	0	0	2.69863	0	0	0	2.45357	0	2.63693	0	2.95928	0	2.47199	0	1.72692	0	0	0	0	0
F2S4_171120_027_H01	118	#665C47	Astro Aqp4	3	#808285	Non-Neuronal	0.351424	0	0	2.59496	0	0	0	0	1.80143	0	2.88989	0	2.26522	0.987778	0	2.38514	2.03408	0	0	0	2.53928	0	0	0	0	0	0	0	0	0	0	2.65521	0	1.16752
F2S4_171120_028_A01	118	#665C47	Astro Aqp4	3	#808285	Non-Neuronal	0	0	0	2.47311	0	0	0	0	0	0	2.52091	0	2.98853	2.08922	0	0	0	0	2.78428	1.80725	2.23661	0	2.95581	0	0	0	0	2.49663	0	0	0	0	0	0
F2S4_171120_028_B01	118	#665C47	Astro Aqp4	3	#808285	Non-Neuronal	0	0	0	2.56715	1.93139	0	0	0	0.917755	0	2.74796	0	2.83926	1.82264	0	0	2.68878	0	2.23358	2.075	1.82264	0	2.25517	0	1.14905	0	2.22987	0	0	0	0	2.40511	0	1.97367
F2S4_171120_028_C01	118	#665C47	Astro Aqp4	3	#808285	Non-Neuronal	0	0	0	2.55233	0	0	0	0	2.94282	0	2.74154	0	2.80619	2.68905	0	0	2.78949	0	3.19645	0	2.87288	0	2.18271	0	0	0	2.42845	1.59803	0	0	0	0	0	0
F2S4_171120_028_D01	118	#665C47	Astro Aqp4	3	#808285	Non-Neuronal	0	0	0	2.678	0	0	0	0	0.399555	0	2.59652	0	2.40322	2.11157	0	0	2.70339	0	2.59486	2.28484	2.72243	0	2.14097	0	0	0	0	0	0	0	0	0	0	0
F2S4_171120_028_E01	118	#665C47	Astro Aqp4	3	#808285	Non-Neuronal	2.32429	0	0	0	0	2.75447	0	0	2.9098	0	0	0	2.66506	0	0	0	2.61082	0	2.49476	0	1.65597	0	0	0	0	0	0	1.88489	1.40289	2.69612	0	2.53998	2.17486	0.385358
F2S4_171120_028_F01	118	#665C47	Astro Aqp4	3	#808285	Non-Neuronal	2.15921	0	0	2.3581	1.87705	0	0	0	2.4181	0	2.72499	0	2.94094	2.3343	0	0	3.20561	1.40365	2.64376	0	2.40904	0	1.16188	0	0	0	0	2.26038	1.52428	0	0	2.36067	2.29446	2.2338
F2S4_171120_028_G01	118	#665C47	Astro Aqp4	3	#808285	Non-Neuronal	0	0	0	2.15925	0	0	0	0	0	0	2.62335	0	2.65557	2.18621	0	0.404968	3.21982	0	2.55631	0	2.49234	0	1.61342	0	2.47922	1.54279	0.404968	0	0	0	1.73979	0	0	0
F2S4_171120_028_H01	118	#665C47	Astro Aqp4	3	#808285	Non-Neuronal	0	0	0	2.02131	0	2.54264	0	0	2.19602	0	3.16358	0	2.98521	0	0	0	2.65754	1.58417	2.94467	0	2.92499	0.419206	2.07795	0	0	0	2.45306	1.61948	0	0	0	2.56435	0	0
F2S4_171129_001_D01	129	#807059	SMC Acta2	4	#8D1800	Endothelial	3.23002	0	0	2.76952	2.22049	0.402972	0	0	0	0	2.83539	0	2.62165	2.26599	0	0	0	1.9673	2.3295	1.86254	2.93929	0	0.402972	0	0	0	0	0	0	2.59548	0	2.0575	1.12166	2.69587
F2S4_171129_002_G01	129	#807059	SMC Acta2	4	#8D1800	Endothelial	2.90016	0	0.59008	2.67285	0.388383	0.59008	0	0	0	0	3.01719	0	2.77038	2.87327	0.59008	0	0	1.22792	1.51591	0	3.1151	0	0.831379	0	0	0	0	0	0	0.59008	0.985584	1.40781	1.66099	2.36604
F2S4_171129_003_A01	129	#807059	SMC Acta2	4	#8D1800	Endothelial	2.91263	0	0	2.33505	0	2.06211	0	0	0	0	3.07475	0	2.60421	2.00249	0	0	0	0.370253	0.804983	0	2.93083	0.702154	0	0	0.370253	0	0	0	0	0	0	2.242	1.88283	2.64045
F2S4_171129_004_B01	129	#807059	SMC Acta2	4	#8D1800	Endothelial	3.11483	0	0	2.57297	0.814728	1.36378	0	0	0	0	2.29189	0	2.49402	2.06845	0	2.36762	0	1.88649	1.20951	2.26339	3.01708	0	1.41284	0	0	0	2.27629	0	0	0	0.575604	2.42763	2.10764	2.65062
F2S4_171129_004_H01	129	#807059	SMC Acta2	4	#8D1800	Endothelial	3.01585	0	0	2.41505	0.586854	0	0	0	0	0	1.18503	0	2.91058	0	0	0.586854	0	1.59816	0.723748	0	2.79388	0	1.77582	0	0	0	2.47313	0	0	0.586854	0.827676	0.723748	0.586854	2.95067
F2S4_171129_007_B01	129	#807059	SMC Acta2	4	#8D1800	Endothelial	3.15968	0	0	2.56809	2.12726	0	0	0	0	0	3.03564	0	2.94742	2.54375	0	0	0	1.46571	0	0	3.10962	0	0	0	0	0	0	0	0	0	0	2.61515	2.22613	0
F2S4_171129_007_C01	129	#807059	SMC Acta2	4	#8D1800	Endothelial	2.64501	0	0	2.73376	0	0	0	0	0	0	2.98738	1.32276	2.24495	2.41721	0	0	1.75919	1.90905	0	1.00444	2.58356	0	0	0	0	0	0	0	0	2.45762	0	0	1.89919	2.64501
F2S4_171129_007_G01	129	#807059	SMC Acta2	4	#8D1800	Endothelial	3.0467	0	0	2.26738	2.74293	0	0	0	0	0	2.60766	0	2.17918	2.47296	0	2.0214	2.60766	1.77106	0	0	2.75988	0	2.12406	0	0	0	0	0	0	0	0	2.35623	2.4641	2.42996
F2S4_171129_007_H01	118	#665C47	Astro Aqp4	3	#808285	Non-Neuronal	2.83636	0	0	2.37601	0	0	0	0	2.79013	0	0.466021	0	2.81128	0	0	0	3.00733	1.80957	2.61574	1.59644	3.2031	0	1.47515	0	0	0	0	0	0	2.30347	0	2.60962	2.02082	1.63683
F2S4_171129_010_B01	118	#665C47	Astro Aqp4	3	#808285	Non-Neuronal	0	0	0	1.96687	0	0	0	0	2.91767	0	0	0	0	2.36332	0	0	2.78141	0	2.93508	0	2.39404	0	0	0	0	2.05617	0	0	0	2.47907	1.179	0	1.62213	2.42504
F2S4_180228_006_C01	118	#665C47	Astro Aqp4	3	#808285	Non-Neuronal	2.61091	0	0	1.42246	0	0	0	0	0	0	2.53292	0	2.90645	2.12348	0	0	2.64178	0	2.9114	0	2.80434	0	0	0	1.33894	0	0	0	0	0	0	0	2.575	2.50242
F2S4_180228_019_B01	118	#665C47	Astro Aqp4	3	#808285	Non-Neuronal	0	0	0	2.63607	0	0	0	0	0.881149	0	3.05246	0	3.05919	0	0	0	0	0	2.51732	2.68613	2.86454	0	2.15206	0	0	0	0	0	0	0	0	0	0	0

## Sheet: Hu Non-Neuronal
sample_name	cluster_id	cluster_color	cluster_label	class_id	class_color	class_label	GPX1_log10_cpm	GPX2_log10_cpm	GPX3_log10_cpm	GPX4_log10_cpm	TXNRD1_log10_cpm	TXNRD2_log10_cpm	TXNRD3_log10_cpm	DIO1_log10_cpm	DIO2_log10_cpm	DIO3_log10_cpm	SEP15_log10_cpm	EPT1_log10_cpm	SELK_log10_cpm	SELM_log10_cpm	SEPN1_log10_cpm	SELO_log10_cpm	SEPP1_log10_cpm	MSRB1_log10_cpm	VIMP_log10_cpm	SELT_log10_cpm	SEPW1_log10_cpm	SEPHS2_log10_cpm	LRP1_log10_cpm	LRP2_log10_cpm	LRP8_log10_cpm	SCLY_log10_cpm	SELENBP1_log10_cpm	SECISBP2_log10_cpm	SEPSECS_log10_cpm	TRNAU1AP_log10_cpm	EEFSEC_log10_cpm	EIF4A3_log10_cpm	RPL30_log10_cpm	NCL_log10_cpm
F2S4_160113_029_H01	73	#476662	Oligo L1-6 OPALIN	3	#F52D19	Non-Neuronal	0	0	0	0	0.522462	0	0	0	0	0	0	0	0	0	0	0	1.34185	0	0	1.17554	2.28696	0	0	1.97408	0.249617	0	0	0.407123	0	1.93671	0	0	0.249617	0.249617
F2S4_160113_030_H01	71	#665C47	Astro L1-6 FGFR3 SLC14A1	3	#F52D19	Non-Neuronal	0	0	0	0	1.85619	0	0	0	0.396334	0	2.43745	0.241891	0	0	0	0	0	1.99735	0	2.24958	1.63085	0	2.34564	0.241891	0	0	0	0	0	0	0.241891	0	2.18486	0
F2S4_160113_039_H01	73	#476662	Oligo L1-6 OPALIN	3	#F52D19	Non-Neuronal	0.33069	0	0	0.645824	2.49179	0.894769	0.645824	1.82736	0	0	0	0.33069	0.516234	0	0	2.66152	0	0	0.33069	1.19969	1.0939	0	1.84895	0.894769	0.516234	0	0	0.33069	1.05201	0	0	0	0.33069	0.645824
F2S4_160113_040_H01	70	#6B998D	OPC L1-6 PDGFRA	3	#F52D19	Non-Neuronal	0	0	0	1.7891	0	1.8657	0	0	0	0	2.26431	2.27401	0	0	1.68018	0	0	0	0	0.841016	0	0	2.82054	0.202339	0	0	0	0	0	0	0	0	0	0.202339
F2S4_160113_041_H01	73	#476662	Oligo L1-6 OPALIN	3	#F52D19	Non-Neuronal	0	0	0	0	0	1.14033	0	0	0	0	0.472965	0	0	0	0	0	0	0	0	0	1.35575	0	0	2.82563	0	0	0	0	0	2.7435	0	0	0	0
F2S4_160113_043_H01	73	#476662	Oligo L1-6 OPALIN	3	#F52D19	Non-Neuronal	0	0	0	0	0.247015	0.247015	0	0	0	0	0	0.608996	0	0	0	0	2.8159	0	2.65092	2.93825	0	0	0	2.59719	0	0	0	2.86985	0	2.40713	0	0	0	2.45518
F2S4_160113_032_H01	72	#6B8059	Astro L1-2 FGFR3 GFAP	3	#F52D19	Non-Neuronal	0	0	2.91918	2.029	0.260305	0	0	0	2.19129	0	0.260305	2.38741	0	0	0	0	0	0	2.56582	1.00133	0	0	0.260305	0	0	0	2.98148	0	2.10527	0	0	0	0	2.53365
F2S4_160113_033_H01	72	#6B8059	Astro L1-2 FGFR3 GFAP	3	#F52D19	Non-Neuronal	0	0	0	0	0	0	0	0.240081	0	0	0	0	0	0	0.240081	0	0	0	0	0	0	0	1.852	0.240081	0	0	0	2.67251	0	0.240081	0	0	0	0
F2S4_160113_035_H01	75	#598069	Micro L1-3 TYROBP	3	#F52D19	Non-Neuronal	2.53772	0	0	0	0.505776	0	0.322696	0	0	0	0	0	0	0	0	0	0	0	0	0	0	2.44698	0	0	0	0	0	2.49548	0	0	0	0	0	0
F2S4_160113_045_H01	73	#476662	Oligo L1-6 OPALIN	3	#F52D19	Non-Neuronal	0	0	0	0	0.2822	0	0	0	0	0	1.89138	0.668437	0	0	0	0	2.96585	0	1.70258	0	2.86625	0	0	3.35031	0	0	0	0	0	0.2822	0	0	2.14359	0
F2S4_160113_046_H01	71	#665C47	Astro L1-6 FGFR3 SLC14A1	3	#F52D19	Non-Neuronal	0	0	0	1.89659	0.306174	1.18564	0	0	1.39002	0	0	0.707171	0	0	0	0	0	0	0	0	2.23027	0	2.70656	0	0	0	0	0	0	2.30021	0	0	0	0
F2S4_160113_047_H01	71	#665C47	Astro L1-6 FGFR3 SLC14A1	3	#F52D19	Non-Neuronal	0	0	0	1.19696	0	1.29993	0	0	0	0	0	0	0	0	0	2.26358	0	1.98112	2.0542	0	0.230915	0	2.48013	0.380872	2.29094	0	2.24142	2.10011	0	0	0	0	0	0
F1S4_160218_025_H01	73	#476662	Oligo L1-6 OPALIN	3	#F52D19	Non-Neuronal	0	0	0	0	0.495987	0	0.315256	0	0	0	0.185627	0	0	0	0	0	0	0	0	0	0.623227	0	0.185627	1.70412	0.185627	0	0	0.414956	2.99388	0.185627	2.61056	0	0	0
F1S4_160218_026_H01	71	#665C47	Astro L1-6 FGFR3 SLC14A1	3	#F52D19	Non-Neuronal	0	0	0	0	2.42261	0.291559	0	0	1.24908	0	0.1698	0	0	0	0	0	0	0	0	0	0	0	2.2927	0	0	0	3.02969	2.02242	0	1.38815	1.44392	0	0	1.69303
F1S4_160218_027_H01	70	#6B998D	OPC L1-6 PDGFRA	3	#F52D19	Non-Neuronal	0.188545	0	0	0	0.629596	0	2.46998	0	0	0	0	0	0	1.34639	1.88711	0.31958	0	0	0	1.69358	1.8211	0.188545	2.65273	0	0	0	0	0	0	0	1.01038	0	0	2.37164
F1S4_160218_028_H01	73	#476662	Oligo L1-6 OPALIN	3	#F52D19	Non-Neuronal	0	0	0.180533	0	0	0	0	0.180533	0	0	0	0	0	0.180533	0	0	0	0	0	0	0	0	0	0.886516	0	0	0	0	0	0	0	0	0	2.42895
F2S4_160113_048_C01	73	#476662	Oligo L1-6 OPALIN	3	#F52D19	Non-Neuronal	0	0	0	0	0.320918	0	0	0	0	0	2.84094	0	0	0	0	0.189451	2.90247	0	0	2.7792	0	0	0	2.28049	0	0	0	0	0	0	0	2.50713	0	0
F2S4_160113_049_H01	73	#476662	Oligo L1-6 OPALIN	3	#F52D19	Non-Neuronal	0	0	0.225683	0	0	0.225683	0	0	0	0	0	0	0	2.19979	0	0.225683	1.73905	0	0	0	2.79174	0	0.373445	0.706606	0	0	0	2.36805	2.5414	0.483494	1.64277	0	0	0
F2S4_160113_057_A01	71	#665C47	Astro L1-6 FGFR3 SLC14A1	3	#F52D19	Non-Neuronal	0	0	0	0	0.275392	1.2616	0	2.17147	0.159168	0	2.24625	0.159168	0	0	0	2.13359	0	0	0.275392	0	0	0	2.78573	0.159168	2.21106	0	2.66197	0	0	0.275392	0	0	0	0
F1S4_160218_030_F01	73	#476662	Oligo L1-6 OPALIN	3	#F52D19	Non-Neuronal	0	0	0.178089	0	0.178089	0	0	0	0	0	1.42899	0.178089	0.178089	0	0	2.4585	0	0	0	0	1.38593	0	1.54361	0	2.15514	0	0	1.51093	0	0.178089	0	0	0	2.92057
F1S4_160218_030_H01	74	#99796B	Endo L2-6 NOSTRIN	3	#F52D19	Non-Neuronal	0	0	0	0	0.160933	0	0	0.160933	0	0	0.160933	0	0	0	0	0	0	0	0	0	2.1974	0	2.09465	0.160933	0	0	2.62273	2.58642	0	0	0	0	0	0
F1S4_160218_031_H01	70	#6B998D	OPC L1-6 PDGFRA	3	#F52D19	Non-Neuronal	0	0	0	0	0	0	0	0	2.25468	0	0	0	0	0	0	0	0	0	0	0	0.143642	0	2.32774	0	0	0	0	0	0	2.27322	1.99736	0	0	0
F1S4_160218_034_H01	73	#476662	Oligo L1-6 OPALIN	3	#F52D19	Non-Neuronal	0	0	0	2.389	0.323491	0	0	0	0	0	0	0.323491	0	0	0	0	0	0	0	0	2.28909	0	0	0.191194	0	0	0	2.13515	0	0	0	0	0.191194	0
F2S4_160113_060_A01	71	#665C47	Astro L1-6 FGFR3 SLC14A1	3	#F52D19	Non-Neuronal	0	0	0	1.73357	0	0	0	0	0	0	2.41813	0	1.89079	0	0	0	0	0	0	2.55387	0.765778	0	1.76672	0	0	0	2.062	2.11341	0	1.81571	2.47792	0	2.03274	0
F1S4_160218_037_A01	73	#476662	Oligo L1-6 OPALIN	3	#F52D19	Non-Neuronal	0	0	0	0	1.35912	0	2.56567	0	0	0	0	1.32456	0	0	0	0	1.4876	0	2.42484	2.52398	2.25698	0	0	2.41032	0	0	0	2.38991	0	0	0	0	0	0
F1S4_160218_038_A01	73	#476662	Oligo L1-6 OPALIN	3	#F52D19	Non-Neuronal	0	0	0	0	1.81266	0.161499	0.161499	0.161499	0	0	0	0	0	0	0	0.806535	0	0	1.84458	2.21974	0	2.59872	0	1.55247	0	0	0	2.25593	0.278953	0.278953	0	0	0	2.25157
F1S4_160218_039_A01	73	#476662	Oligo L1-6 OPALIN	3	#F52D19	Non-Neuronal	0	0	0	0	0	0	0	0	0	0	1.21676	0	0	0	0	0	2.49547	0	1.62764	0.175836	0	0	0	2.52103	0	0	0	2.92118	0	0	0	0	0	2.4778
F1S4_160218_040_A01	73	#476662	Oligo L1-6 OPALIN	3	#F52D19	Non-Neuronal	0	0	0	2.14897	0.812049	0	0	0	0	0	0	0	0	0	0	0	0	0	0	0	1.94298	0	1.25551	2.72871	0	0	0	0	0	0	0	0	0	0
F1S4_160218_041_H01	73	#476662	Oligo L1-6 OPALIN	3	#F52D19	Non-Neuronal	0	0	0	0	0.189723	0	0	0	0	0	0	0	0	0	0	0	0	0	0	0	2.53301	0	0	2.11307	0	0	0	2.13802	0	0	0	0	0	0
F1S4_160218_042_H01	73	#476662	Oligo L1-6 OPALIN	3	#F52D19	Non-Neuronal	0	0	0	0	0.181512	0	0	0	0	0	0	0	0	0	0	1.43871	0	0.309135	2.15425	0	1.94784	0	1.49984	2.46702	0	0	0	2.04732	0	0.181512	0	0	2.0453	1.62846
F1S4_160218_044_H01	71	#665C47	Astro L1-6 FGFR3 SLC14A1	3	#F52D19	Non-Neuronal	0	0	0	0	2.55461	0.188496	0	0	2.67859	0	0	0	0	0	0	2.07331	0	0	1.91941	0.570229	2.40434	0	0.319507	0.42002	2.29369	0	2.3541	2.29846	0	0.188496	0.42002	2.37549	0	1.20997
F2S4_160421_021_H01	70	#6B998D	OPC L1-6 PDGFRA	3	#F52D19	Non-Neuronal	1.40757	0	0	0	0	0	0	0	0	0	0	1.92818	0	0	0	0	0	0	0	1.96822	0	0	2.48723	0	0	1.31223	0	0.354016	0	0.212123	0	0	0	0
F2S4_160421_023_H01	70	#6B998D	OPC L1-6 PDGFRA	3	#F52D19	Non-Neuronal	0	0	0	0	0.222976	2.46967	2.40016	0	2.52612	0	1.64948	0	0	0	0	0	0	0	0	0	0	0	2.39197	0	0	0	2.77975	0	0	0	1.3249	0	0	0
F2S4_160421_024_H01	71	#665C47	Astro L1-6 FGFR3 SLC14A1	3	#F52D19	Non-Neuronal	0	0	0	0.211716	2.34416	0	0	0	0	0	0	0	0	0	0	1.95525	0	0	0	0	0	0	2.71541	0.86227	0	0	2.88327	2.82653	0	0	0	0	0	2.00384
F2S4_160421_026_H01	74	#99796B	Endo L2-6 NOSTRIN	3	#F52D19	Non-Neuronal	0	0	0.390541	0	0	0	0	0	0	0	0	0	0	1.77313	0	0	2.94951	0.390541	0	3.20496	2.76973	0	0	0	0	0	0	0	0	0	0	0	0	0
F2S4_160421_027_H01	73	#476662	Oligo L1-6 OPALIN	3	#F52D19	Non-Neuronal	0	0	0	0	0	0	0	0	0	0	0	0	2.5654	0	0	0	3.11512	0	0.4474	2.64314	2.83263	0	0.278932	3.02061	0	0	0	0	0	0	0	0	0	0
F2S4_160421_028_H01	73	#476662	Oligo L1-6 OPALIN	3	#F52D19	Non-Neuronal	0	0	0	0	0	0	0	0	0	0	0	0	0	0	0	2.89166	0	0	2.70268	0	2.71673	0	0	0	0	0	0	0	0	0	0	0	2.37361	0
F2S4_160421_029_H01	73	#476662	Oligo L1-6 OPALIN	3	#F52D19	Non-Neuronal	0	0	0	2.64362	0	0	0	0	0	0	0	2.73477	0	0	0	0	1.72468	0	0	2.92376	2.19451	0	0	1.66174	0	0	0	0	0	0	0	0	2.43713	0
F2S4_160421_031_H01	71	#665C47	Astro L1-6 FGFR3 SLC14A1	3	#F52D19	Non-Neuronal	0	0	0	0	0	0.208063	0	0	2.49924	0	2.3725	1.90128	2.02317	0	0	0.538872	0	0	0	1.8807	2.24742	0	2.04777	1.40796	0	0	1.14322	0	0.609911	0.982466	0	1.38658	1.86277	0
F2S4_160421_034_H01	73	#476662	Oligo L1-6 OPALIN	3	#F52D19	Non-Neuronal	0	0	0	0.174552	0	0	0	0	0	0	2.51978	1.61873	1.43487	1.97994	0	0	2.35141	0	0	0	2.57914	1.72381	0	2.99166	0	0	0	0.29872	0	1.14183	0.59859	0	0	0
F2S4_160421_036_H01	73	#476662	Oligo L1-6 OPALIN	3	#F52D19	Non-Neuronal	0	0	0	2.27256	1.61154	2.59375	0	0	0	0	2.7747	0.195831	0	0	0	0	0	2.36821	0	0.515742	2.07532	0	0	2.66404	0	0	0	0	0	0.195831	0	0	0	2.38688
F2S4_160421_039_H01	73	#476662	Oligo L1-6 OPALIN	3	#F52D19	Non-Neuronal	0	0	0.221226	0	0	1.5342	0	0	0	0	0	0	0	2.50314	0	0	2.9222	0	0	2.60804	2.17934	0	0	0	0	0	0	0	0	0	0.221226	0	0	0
F1S4_160106_003_A01	73	#476662	Oligo L1-6 OPALIN	3	#F52D19	Non-Neuronal	1.31546	0	0	0	0.231137	0	0	0	0	0	2.92027	1.28488	0	0	0	0	0	0	0	0	3.09288	0	0	2.0783	0	0	0	0	0	0.231137	0	0	2.21491	0
F1S4_160317_001_H01	71	#665C47	Astro L1-6 FGFR3 SLC14A1	3	#F52D19	Non-Neuronal	0	0	0	0	0.398027	0	0	0.176139	0	0	0	0	0	1.62339	0	0	0	0	0	0	2.77466	0	2.11073	0.176139	0	0	0.699085	0	0	0.176139	0	0	0	0
F1S4_160317_011_H01	71	#665C47	Astro L1-6 FGFR3 SLC14A1	3	#F52D19	Non-Neuronal	0	0	0.197289	0	0.197289	0	0	0	0	0	0.197289	0.197289	0	0	0	0	0	0	1.52862	0	2.2818	0	2.37007	0.197289	0.790657	0	0.197289	2.60649	0	0	2.31568	0	1.52116	2.05798
F2S4_160421_051_H01	70	#6B998D	OPC L1-6 PDGFRA	3	#F52D19	Non-Neuronal	0	0	0	0	2.2038	0	0	0	1.37076	0	0	0.175985	2.22499	0	0	0	0	0	0	2.48327	1.63818	0	0	0.175985	0.777886	0	0	0	2.60981	0	0.175985	0	0	2.25132
F2S4_160421_055_H01	70	#6B998D	OPC L1-6 PDGFRA	3	#F52D19	Non-Neuronal	0	0	0	2.53269	0	0.250347	0	0	0	0	0	0	0	0	1.34345	0	0	0	2.08861	2.3472	0	0	1.57572	0	2.42884	0	0	2.64496	0	0	0.408139	0	0	0
F2S4_160421_056_H01	71	#665C47	Astro L1-6 FGFR3 SLC14A1	3	#F52D19	Non-Neuronal	0	0	0	2.02061	0	0	0	0	0	0	0.220508	1.33259	0	0	0	2.38107	0	0	0	0.474885	2.00669	0	2.55175	1.34575	1.22729	0	1.67493	1.97134	1.58031	0.634241	0.220508	0	0	0
F2S4_160421_063_H01	70	#6B998D	OPC L1-6 PDGFRA	3	#F52D19	Non-Neuronal	0	0	0	0	0	0	0	0.51033	0	0	0.674921	0	2.97537	0	0	0	0	0	0	0	2.61266	0	2.81697	0	0	0	0	0	0	0	0	0	0	0
F2S4_160421_066_H01	71	#665C47	Astro L1-6 FGFR3 SLC14A1	3	#F52D19	Non-Neuronal	0	0	0	0	0.412499	0.528639	0.253487	0	2.22182	0	0	0.253487	0	0	0	0.910279	0	0	0	0	1.95696	0	2.86439	0.253487	0.816128	0	2.53481	2.18745	2.9187	0	0.412499	0	0	2.44593
F2S4_160421_067_H01	73	#476662	Oligo L1-6 OPALIN	3	#F52D19	Non-Neuronal	0	0	0	0	0	0	0	0	0	0	0.192363	0	2.42165	1.66407	0	1.34589	2.0637	0.192363	0	0	2.81082	0	0	2.83519	0	0	0	2.63187	1.31185	0	0	0	0	0
F2S4_160421_068_H01	70	#6B998D	OPC L1-6 PDGFRA	3	#F52D19	Non-Neuronal	0	0	0.202724	0	0	1.1105	0	0	0	0	0	1.8224	0	0	1.20062	0	0	0	0	0	0	0	1.47061	0.599263	0	0	0	0.34039	0	0.34039	0.941175	0	0	0
F2S4_160421_071_H01	70	#6B998D	OPC L1-6 PDGFRA	3	#F52D19	Non-Neuronal	0	0	0	2.34045	0.309227	0	0	0	0	0	0	0.968709	0	0	0.712012	0	0	0	0	0	2.27861	0	2.65867	0	0	1.39579	0	0	0	0	0	0	0.181573	0
F2S4_160421_072_H01	73	#476662	Oligo L1-6 OPALIN	3	#F52D19	Non-Neuronal	0	0	0	2.32174	0.178387	0	0.178387	0	0	0	0.178387	2.16667	2.12241	0	0	0	2.4737	0	2.30676	0	2.62384	0	0	2.34328	0	0	0	0	0	0.304469	0	1.62994	2.29796	0
F2S4_160421_073_H01	73	#476662	Oligo L1-6 OPALIN	3	#F52D19	Non-Neuronal	0	0	0.230382	0	0	0	0	0	0	0	0	0	0.230382	0	0	0	0	2.50715	0	1.89966	0	0	0	2.55542	0	0	0	0	0	0.770716	0	0	0	0
F2S4_160421_074_H01	70	#6B998D	OPC L1-6 PDGFRA	3	#F52D19	Non-Neuronal	0	0	0	0	0	0	0	0	0	0	1.49799	0	0	0	0	0	0	0	0	2.90993	2.49397	0	2.99317	0.178387	0	0	0	2.21498	0	0.178387	0	0	0	0
F2S4_160421_075_H01	70	#6B998D	OPC L1-6 PDGFRA	3	#F52D19	Non-Neuronal	0	0	0.377931	0	0.377931	0	0	0	0	0	0.377931	0	2.41457	0	2.81682	0	0	0	0	2.7966	2.42488	0	0.576901	0	0	0	0	0	0	0	0	0	0	0
F2S4_160421_076_H01	73	#476662	Oligo L1-6 OPALIN	3	#F52D19	Non-Neuronal	0	0	0	0	0.209318	0	0	0	0	0	0	0	0	0	0	0	0	0	0	0.209318	1.85863	0	0	2.75406	0	0	0	1.86966	0	0.209318	0	0	0	0
F2S4_160421_077_H01	73	#476662	Oligo L1-6 OPALIN	3	#F52D19	Non-Neuronal	0	0	0	1.78124	0	0	0	0	0.371188	0	0	0	2.54841	0	0	0	2.71458	0	1.98631	0	0	0	0	3.11988	0	0	0	0	0	2.55988	0	0	0	0
F2S4_160421_078_H01	73	#476662	Oligo L1-6 OPALIN	3	#F52D19	Non-Neuronal	0	0	0.307577	0	0.307577	0	0	0.307577	0	0	2.96626	0	0	0	0	0	0	0	2.93623	0	0	0	0	1.9719	0	0	0	0	0	0	0	0	0	0
F2S4_160421_080_H01	71	#665C47	Astro L1-6 FGFR3 SLC14A1	3	#F52D19	Non-Neuronal	0	0	0	0	0	0	0	0	1.99077	0	2.03689	0.28197	1.60538	0	0	1.67779	0	0	0	0.573147	2.07191	2.40986	2.5089	0	1.2419	0	2.34319	0	0	0.28197	0	0	0	2.36771
F2S4_160421_081_B01	73	#476662	Oligo L1-6 OPALIN	3	#F52D19	Non-Neuronal	0	0	0	0.342263	0	0	0	0	0	0	2.6165	0	0	0	0	0	2.48	0	2.06041	0	2.81833	0	0	2.49358	0	0	0	0	0	0.662529	0	0	0	1.74945
F2S4_160421_084_H01	73	#476662	Oligo L1-6 OPALIN	3	#F52D19	Non-Neuronal	0	0	0	0	0	0	0	0	0	0	0	2.46289	0	0	0	0	2.57366	0	0	0	2.36668	0	0.730017	0	0	0	0	0	0	0.272794	0.503145	0	2.5782	0
F2S4_160421_085_H01	70	#6B998D	OPC L1-6 PDGFRA	3	#F52D19	Non-Neuronal	0	0	0	0.148186	0.25847	0.148186	0	0	0	0	0	2.85804	0	0	1.82528	0	0	0	0	0.148186	0.148186	0	0	2.54546	0	0	0	0	0	0.25847	0.148186	0	0	0
F2S4_160421_086_H01	75	#598069	Micro L1-3 TYROBP	3	#F52D19	Non-Neuronal	2.0395	0	0	0	0	0	0	0	0	0	2.51397	0	2.34282	0	0	1.95133	0	0	0	0.235198	3.04586	0	1.07116	2.59563	0	0	0	2.62101	0	0	0	0	0	0
F2S4_160421_091_H01	70	#6B998D	OPC L1-6 PDGFRA	3	#F52D19	Non-Neuronal	0	0	0	0	0.192577	0	0	0	0	0	0	0	0	0	1.90741	0	1.97658	0	0	0	2.08867	0	2.21765	0.192577	0	0	0	2.05797	0	0	0	0	0	0
F2S4_160421_092_H01	70	#6B998D	OPC L1-6 PDGFRA	3	#F52D19	Non-Neuronal	0	0	0	0	0.24949	0	0	0	0	0	0	0	0	0	0	0.522259	0	0	0	0	2.00488	0	2.2987	1.87803	1.27537	0	0	0	0	0	0	0	0	0
F1S4_160526_030_H01	71	#665C47	Astro L1-6 FGFR3 SLC14A1	3	#F52D19	Non-Neuronal	0	0	0	2.09181	1.18402	1.52785	0	0	2.16655	0	0.202721	0	0	0	0	0.910531	0	0	0	2.1683	1.81454	0	1.90372	0.340386	0	0	0	1.02192	0	1.04581	0	0	0	2.23332
F1S4_160526_072_H01	70	#6B998D	OPC L1-6 PDGFRA	3	#F52D19	Non-Neuronal	0	0	0	1.65779	0.316335	0	0.901256	0	2.36239	0	2.64439	0.186354	0	0	0	0	0	0	0	0	0	0	0	0	0	0	0	0	0	0	0	0.316335	0	0
F2S4_160421_088_H01	73	#476662	Oligo L1-6 OPALIN	3	#F52D19	Non-Neuronal	0	0	0	0	0.212741	0	0	0	0	0	0	0	0	0	0	0	2.7058	0	0	2.99266	2.69872	0	0.212741	2.9779	0	0	0	0	0	0.212741	0	0	0	0
F2S4_160421_089_H01	71	#665C47	Astro L1-6 FGFR3 SLC14A1	3	#F52D19	Non-Neuronal	0	0	0	0	0.227	0	0	0.227	0	0	0.375317	0.227	0	0	0	1.05301	0	0	1.02579	0	1.37395	0	1.9873	0.227	2.22841	0	2.57184	0	0	0.227	2.38131	0	0	0
F1S4_160721_130_H01	70	#6B998D	OPC L1-6 PDGFRA	3	#F52D19	Non-Neuronal	0	0	0	0	0.303038	0.177431	0	0.177431	0	0	0	0.702179	1.14985	0	0	0.546934	0	0	1.1006	2.43213	0	0	1.93593	0	0	0	0	2.53033	0	0	0.781493	0	0	0
F2S4_160113_037_D01	72	#6B8059	Astro L1-2 FGFR3 GFAP	3	#F52D19	Non-Neuronal	0	0	0	0	0	0	0	0	1.49918	0	0	0.217557	2.64786	0	0	0.835849	1.60224	0	0	0	2.28371	0	2.33624	0.556437	0	0	2.61281	2.62369	0	0	0	0	0	0
F2S4_160113_037_H01	70	#6B998D	OPC L1-6 PDGFRA	3	#F52D19	Non-Neuronal	0	0	0	0	0	0.353618	0	0.211848	0	0	0	0	2.89279	0	0	0	0	0	0	0	0	0	2.63894	0	0	0	0	0	0	0	0	0	0.211848	0
F1S4_160721_097_B01	71	#665C47	Astro L1-6 FGFR3 SLC14A1	3	#F52D19	Non-Neuronal	0	0	0	0	0.347242	0	0	0	1.82689	0	0	0	0	0	0	0	0	0	0	1.5244	0	0	2.1701	0.207439	2.41903	0	0	0	0	0.347242	2.06026	0	0	2.47859
F1S4_160721_097_H01	70	#6B998D	OPC L1-6 PDGFRA	3	#F52D19	Non-Neuronal	0	0	0.194708	0	0	0.194708	0	0.194708	0	0	1.16366	0	0	0	0	0.430895	0	0	0	0	0	0	1.82728	0.194708	1.3629	0	0	2.73066	0.194708	0	2.41037	0	0	1.99999
F1S4_160721_100_H01	73	#476662	Oligo L1-6 OPALIN	3	#F52D19	Non-Neuronal	0	0	1.62543	0	0	0.196559	0	0	0	0	2.30268	1.80979	0	0.196559	0	1.68581	2.08759	0	1.44564	0	2.34847	0	0	2.19025	0	0	0	2.39191	0	0	0	0	0	0
F1S4_160721_101_H01	70	#6B998D	OPC L1-6 PDGFRA	3	#F52D19	Non-Neuronal	0	0	0.199002	2.17887	0.334958	0	0	0	0	0	1.22256	0	0.199002	0.199002	0	0	0	0	2.22784	0.199002	0	0	1.9941	0.334958	0	0	0	0.521794	0	0	0.334958	2.26914	2.28514	0
F1S4_160721_102_H01	71	#665C47	Astro L1-6 FGFR3 SLC14A1	3	#F52D19	Non-Neuronal	0	0	0.417909	0	0	0	2.1661	0	0	0	1.09073	0	0	0	0	0	0	0	0	1.99859	2.56672	0	1.6448	0	0	0	0	0	0.187298	0	0	0	0	0
F1S4_160721_103_H01	71	#665C47	Astro L1-6 FGFR3 SLC14A1	3	#F52D19	Non-Neuronal	0	0	0.182975	0	0	0	1.90656	0	2.53349	0	0	0	0	0	0	1.40869	0	0	2.37818	2.37243	2.80098	0	0	0	2.32235	0	0	1.7189	0	2.00013	0.311315	0	0	0
F2S4_160113_052_H01	72	#6B8059	Astro L1-2 FGFR3 GFAP	3	#F52D19	Non-Neuronal	0	0	0	0	2.23882	0	0	0	0	0	0	0	0	0	0	2.1413	0.796666	0	0	0	0	0	2.53025	0.219497	0	0	0.219497	3.11566	0	2.68223	0	0	0	0
F1S4_160721_126_H01	73	#476662	Oligo L1-6 OPALIN	3	#F52D19	Non-Neuronal	0	0	0	0.624708	2.37105	0	0	0	0	0	2.73524	0	0	1.92389	0	2.20526	0	0	0	2.03484	0.788353	0	0	1.71419	0	0	0	2.14366	0	0	0	0	0	0
F1S4_160721_127_B01	73	#476662	Oligo L1-6 OPALIN	3	#F52D19	Non-Neuronal	0	0	0	0	0	0	0	0	0	0	1.502	2.59318	1.21443	0.230267	0	0	0	0	0	1.89166	0.652868	0	0.579457	0	0	0	0	0.902702	0	0.230267	0	0	2.58772	0
F1S4_160721_127_H01	75	#598069	Micro L1-3 TYROBP	3	#F52D19	Non-Neuronal	0	0	0	1.83444	2.34151	0	0	0	0	0	2.08969	0	0	0	0	0	0	0	0	2.45884	0	0	2.06077	0.528327	0	0	0	0	1.59114	0	0	2.80938	0	0
F1S4_160721_128_H01	70	#6B998D	OPC L1-6 PDGFRA	3	#F52D19	Non-Neuronal	0	0	0.230707	2.43948	0.380576	0	0	0	0	0	0	0.230707	0	0	0	0	0	0	0	0	1.49337	0	2.67272	0.230707	0	0	0	1.95775	0	0.230707	0	0	0.230707	0
F1S4_160721_133_H01	73	#476662	Oligo L1-6 OPALIN	3	#F52D19	Non-Neuronal	0	0	0	0	0	0	0	0	0	0	2.36813	0	0	0.4655	0	0	2.82363	0	1.80879	1.64244	2.53436	0	0	0.99842	0	0	2.57689	2.33213	0	0.4655	0	0	2.32561	2.22227
F1S4_160721_136_H01	70	#6B998D	OPC L1-6 PDGFRA	3	#F52D19	Non-Neuronal	0	0	0	0	0	0	0	0	0	0	0	2.32311	2.56928	0	0	0	0	0	0	2.70202	0	0	0	0	0	0	0	0	0	0	0	0	0	2.51543
F2S4_160113_053_H01	75	#598069	Micro L1-3 TYROBP	3	#F52D19	Non-Neuronal	2.37436	0	0.217837	2.35481	0	0	0	0	0	0	0	0.217837	0	0	2.84382	0	0	0	0	0	0	0	0	0	0	0	0	2.25399	0	0	0	0	0	0
F1S4_160721_075_C01	73	#476662	Oligo L1-6 OPALIN	3	#F52D19	Non-Neuronal	0	0	0	0	0.204419	0	0	0	0	0	0	0	0	0	0	1.45714	0	0	0	2.13815	2.03099	0	0	0.204419	1.31882	0	0	0	0	0.204419	0	0	0	2.14193
F1S4_160721_104_H01	71	#665C47	Astro L1-6 FGFR3 SLC14A1	3	#F52D19	Non-Neuronal	1.63797	0	0.210651	1.8469	0.210651	0	0	0	2.55016	0	0.928954	0.615025	0	0	0	1.9244	0.210651	0	0	0	0.35189	0	0.959763	0.210651	0.928954	0	0	2.22122	0	2.36543	0	0	0	0
F1S4_160721_106_H01	73	#476662	Oligo L1-6 OPALIN	3	#F52D19	Non-Neuronal	0	0	0.226419	0	0	0	0	0	0	0	0.226419	2.23399	0	0.811199	0	0	0	0	0	2.43235	0	0	0	2.43345	0	0	0	0	0	2.15427	0	0	2.01555	0
F1S4_160721_137_H01	73	#476662	Oligo L1-6 OPALIN	3	#F52D19	Non-Neuronal	0	0	0.215156	0	2.33789	0	0	0	0	0	1.47499	2.47774	0	0	0	2.69435	0	0	0	0	0.830627	0	0	2.22455	0	0	0	0	0	2.33789	0.215156	0	0	2.58985
F1S4_160721_138_H01	71	#665C47	Astro L1-6 FGFR3 SLC14A1	3	#F52D19	Non-Neuronal	0	0	0	0	2.70256	0	0	0	0	0	0	0	0	0	0	0	0	0	0	0	0	0	1.89435	0	2.59031	0	0	2.67621	0	1.07795	0	0	0	0
F1S4_160721_077_H01	73	#476662	Oligo L1-6 OPALIN	3	#F52D19	Non-Neuronal	1.30581	0	0.204299	0.204299	0.914233	0	0	0	0	0	0	0	0	0	0	0	0	0	0	0	0	0	0	2.00307	0	0	0	0	0	1.26527	0	0	0.531816	1.25087
F1S4_160721_078_C01	71	#665C47	Astro L1-6 FGFR3 SLC14A1	3	#F52D19	Non-Neuronal	0	0	0	0	1.28238	0.217102	0	0	2.19852	0	1.39788	0	0	0.217102	0	1.72332	0	0	0	0	1.43043	0	2.10318	0	1.31083	0	0.217102	1.0801	0	0.361179	0	0	0	0.217102
F1S4_160721_078_H01	73	#476662	Oligo L1-6 OPALIN	3	#F52D19	Non-Neuronal	0	0	0.213926	2.14342	0	0	0	0	0	0	1.89924	0	0	1.54867	0	0	0	0	0	0	2.14143	0	0	2.85171	0	0	0	0	0	0	0	0	0	2.02018
F1S4_160721_079_H01	71	#665C47	Astro L1-6 FGFR3 SLC14A1	3	#F52D19	Non-Neuronal	0	0	0.208368	0	0.348588	0	0	0	1.12433	0	2.18493	1.82929	0	0	1.39817	0.208368	0	0	0	0	0	0	1.93745	0.208368	0.610514	0	0	0.671576	0	0	0	0	0	0
F1S4_160721_107_H01	73	#476662	Oligo L1-6 OPALIN	3	#F52D19	Non-Neuronal	0	0	0.379083	0.229653	0.229653	0	0	0	0	0	0	0	0	0	0	0	2.66431	0	2.02051	0	0.229653	0	0	1.85783	0	0	0	2.67531	2.59323	1.69095	0	0	0	0
F1S4_160721_109_H01	71	#665C47	Astro L1-6 FGFR3 SLC14A1	3	#F52D19	Non-Neuronal	0	0	0.329768	0	0.19546	0	0	0	2.49246	0	2.45255	0.19546	0	0	1.11182	1.81065	0	0	1.96887	0.19546	0.515032	0	2.34322	0.19546	0	0	0	2.09264	0	0	0	0	1.92715	0.860489
F1S4_160721_140_H01	73	#476662	Oligo L1-6 OPALIN	3	#F52D19	Non-Neuronal	2.52357	0	0.240476	0	0	0	0	0	0	0	0	2.28462	0	0	0	0	2.99886	0	2.13471	0	0.507737	0	0	2.32596	0	0	0	0	1.47492	0.394349	0	0	0	0
F1S4_160721_142_H01	70	#6B998D	OPC L1-6 PDGFRA	3	#F52D19	Non-Neuronal	0	0	0.199439	0	0.199439	0	1.31841	0	0	0	0	1.15853	0	0	0	0	0	0	2.54567	0	1.83639	0	0	0	0.199439	0	0	0	0	0.199439	0	0	0	0
F1S4_160802_145_H01	73	#476662	Oligo L1-6 OPALIN	3	#F52D19	Non-Neuronal	0	0	0	2.27647	0	0	0	0	0	0	0	0.264652	2.46198	0	0	0	2.34911	0	1.81708	0	3.19973	0	0	2.47315	0	0	0	0	0	0	0	0	0	0
F1S4_160802_002_H01	70	#6B998D	OPC L1-6 PDGFRA	3	#F52D19	Non-Neuronal	0	0	0	0.201318	0	0.442343	0	0	0	0	1.19708	0	0	0	0	0.201318	0	0.338341	0	0	1.68812	0	2.16805	0.201318	1.49241	0	2.48471	1.9573	0	0	2.61555	0	1.91582	0
F1S4_160802_003_H01	72	#6B8059	Astro L1-2 FGFR3 GFAP	3	#F52D19	Non-Neuronal	0	0	0	0	0	0	0	0	0	0	0	0	0	0	0	0.610315	0	0	0	0	2.18116	0	2.39078	0	0	0	2.81917	0.208267	0.208267	0.539253	0	0	0	0
F1S4_160802_081_H01	73	#476662	Oligo L1-6 OPALIN	3	#F52D19	Non-Neuronal	0	0	0	2.91123	0.848838	0	0	0	0	0	0	0	2.69602	0	0	0	2.39469	0	0	0.223598	1.64441	0	0	2.95228	0	0	0	1.11797	0	0	0	0	0.567447	0
F1S4_160802_113_H01	73	#476662	Oligo L1-6 OPALIN	3	#F52D19	Non-Neuronal	0	0	0	0	0	0	0	0	0	0	0	0	1.77979	0	0	0	2.45462	0	2.03301	2.75101	2.95156	0	0	0	0	0	0	0	0	2.06386	0	0	0	0
F1S4_160802_114_H01	73	#476662	Oligo L1-6 OPALIN	3	#F52D19	Non-Neuronal	0	0	0	0	0	0	0	0	0	0	1.89727	0	0	1.51914	0	0	0	0	0	0	1.97082	0	2.27627	0	0	0	0	0	0	0	1.91301	0	0	0
F1S4_160802_147_H01	73	#476662	Oligo L1-6 OPALIN	3	#F52D19	Non-Neuronal	0	0	0	0	1.62442	0	0.337394	0	0	0	0	1.14368	2.75283	0	0	0	0	0	0	2.40608	2.54682	0	0	2.39183	0	0	0	0	0	0	0.655524	0.90569	0	0
F1S4_160721_037_H01	71	#665C47	Astro L1-6 FGFR3 SLC14A1	3	#F52D19	Non-Neuronal	0	0	0	0	0	0.2427	1.96887	0	0	0	0	0	0	0	0	0	0	0	0	0	1.18253	0	1.82041	0	0	0	1.91303	0	0	0	0	0	0	0
F1S4_160721_080_H01	73	#476662	Oligo L1-6 OPALIN	3	#F52D19	Non-Neuronal	0	0	0	0	1.09688	0	0	0	0	0	0.588249	0.949668	2.36223	0	0	0	0.829278	0	0	0	2.29014	0	0	0.499151	0	0	0	0	0	2.45686	0.913125	0	0	0
F1S4_160721_081_H01	70	#6B998D	OPC L1-6 PDGFRA	3	#F52D19	Non-Neuronal	0	0	0	0.205672	0	0	0	0	0	0	2.00147	0	0	0	0	0.344679	0	0	0	0	0	0	1.70475	0	2.6388	0	0	2.51035	0	0	0.344679	0	0	0
F1S4_160721_091_H01	73	#476662	Oligo L1-6 OPALIN	3	#F52D19	Non-Neuronal	0	0	0	0	0	0	0	0	0	0	1.43873	0	1.60202	0	0	2.19199	1.55411	0	1.46022	0	1.73178	0	0	2.15127	0	0	0	2.05084	0.378895	2.08696	0	0	2.17616	2.03994
F1S4_160721_114_H01	74	#99796B	Endo L2-6 NOSTRIN	3	#F52D19	Non-Neuronal	0	0	0	0	0	0	0	0.214381	0	0	2.33847	2.36915	0	0	2.49392	0	0	0	2.07815	2.26524	2.76143	0	0	0	1.55756	0	0	0	0	0	0	0.214381	0	1.47307
F1S4_160802_004_H01	71	#665C47	Astro L1-6 FGFR3 SLC14A1	3	#F52D19	Non-Neuronal	0	0	0	1.70051	0	0	0	0	0	0	0	0	0	0	0	0	0	0	0	0.795576	0.747406	0	1.16937	0	0	0	2.74177	0	0	0.218983	0.218983	0	0	0
F1S4_160802_116_H01	70	#6B998D	OPC L1-6 PDGFRA	3	#F52D19	Non-Neuronal	0	0	0.230558	2.2577	0.230558	0.230558	0	0	2.51415	0	0	0	0	0	0	1.69311	0	0	0	0	0	0	2.84858	0.230558	0	0	0	0	0	0	0	0	0	0.230558
F1S4_160802_117_H01	73	#476662	Oligo L1-6 OPALIN	3	#F52D19	Non-Neuronal	0	0	0	2.43667	1.98905	0	0	0	0	0	0	0	0	0	0	0	0	0	0.671011	0	2.13233	0	0	2.73395	0	0	0	0	0	0	0	0	0	0
F1S4_160802_008_H01	70	#6B998D	OPC L1-6 PDGFRA	3	#F52D19	Non-Neuronal	0	0	0	0	0	0	0	0	0	0	0	0	0	0	0	0	0	0	0	0	0	0	1.63737	0.44577	0	0	0	0	0	1.73824	0.203311	0	0	0
F1S4_160802_082_H01	70	#6B998D	OPC L1-6 PDGFRA	3	#F52D19	Non-Neuronal	0	0	0.173283	0	1.68189	0	0	0	0	0	1.94586	0	1.52959	0	1.22247	0	0	0	0	1.95775	1.92612	0	0	0.173283	1.79783	0	0	0	0	0	1.49694	0	0	0
F1S4_160802_083_H01	70	#6B998D	OPC L1-6 PDGFRA	3	#F52D19	Non-Neuronal	0	0	0.186211	0	0	0	0	0	0	0	2.9719	2.92589	0	0	0	2.18023	0	0	0	0	2.33596	0	2.48136	0	0	0	0	0	0	0	0	0	0.565471	0
F1S4_160802_118_H01	73	#476662	Oligo L1-6 OPALIN	3	#F52D19	Non-Neuronal	0	0	0	0	1.36985	0	0	0.220064	0	0	0	0.220064	0	0	0	1.20887	0	0	2.46438	2.66671	2.2336	0	0	2.1039	0	0	0	2.05877	2.14478	0	0	0	0	0
F1S4_160802_010_H01	71	#665C47	Astro L1-6 FGFR3 SLC14A1	3	#F52D19	Non-Neuronal	0	0	0	0	0.499139	0	0	0	0	0	0.317647	0.499139	0	0.18724	0	0.18724	0	0	0	0	0	0	2.71107	0.18724	0.626754	0	2.99779	0	0	0.18724	0	0	0	2.20995
F1S4_160802_084_H01	71	#665C47	Astro L1-6 FGFR3 SLC14A1	3	#F52D19	Non-Neuronal	0	0	0.197264	0	0.197264	0	0	0	0	0	0.435338	2.642	0	0	0	0	0	0	0	0	1.85563	0	2.13389	0	2.45488	0	2.70791	0	0	0.197264	0	0	0	0
F1S4_160802_122_H01	73	#476662	Oligo L1-6 OPALIN	3	#F52D19	Non-Neuronal	0	0	0	0	0	0	0	0	0	0	0	0	0	0	0	2.2492	2.3578	0	0	0	2.9005	0	0	2.63311	0	0	0	0	2.15995	0	0	0	0	0
F1S4_160802_148_H01	73	#476662	Oligo L1-6 OPALIN	3	#F52D19	Non-Neuronal	0	0	0	2.34002	0.195521	0	0	0	0	0	0.515149	0	0	0	0	0	2.30963	0	0	2.61262	2.98471	0	0	3.29287	0	0	0	0	0	2.54915	0	0	0	2.39805
F1S4_160802_052_H01	70	#6B998D	OPC L1-6 PDGFRA	3	#F52D19	Non-Neuronal	0	0	0	0.184473	0	0	0	0	0	0	2.06978	0	2.22729	0	0	0	0	0	0	0	0	0	1.39472	0	1.40389	0	0	0	0	0	0	0	0	0
F1S4_160802_150_H01	73	#476662	Oligo L1-6 OPALIN	3	#F52D19	Non-Neuronal	0	0	0	0	0	0	0	0	0	0	0.196439	0	0	0	0	0	2.90372	0	2.47064	0	2.18019	0	0.196439	2.10905	0	0	0	0	0	0	0	0	0	0
F1S4_160802_130_H01	71	#665C47	Astro L1-6 FGFR3 SLC14A1	3	#F52D19	Non-Neuronal	0	0	0	0	0.186788	0	0	0	2.75143	0	2.36262	0	0	0	1.85695	1.81971	0	0	2.22287	0	1.95525	0	2.21154	0	0	0	2.66574	0.186788	0	2.06848	1.82323	0	0	0.186788
F1S4_160802_152_H01	70	#6B998D	OPC L1-6 PDGFRA	3	#F52D19	Non-Neuronal	0	0	0	0	0.177468	0	0	0	0	0	0.816399	0	1.20798	0	0	0	0	0	0	2.57581	2.24464	0	2.69959	0.303093	0	0	0	2.07227	0	0	0	0	2.07963	2.36771
F1S4_160802_153_H01	73	#476662	Oligo L1-6 OPALIN	3	#F52D19	Non-Neuronal	2.31402	0	0	0	0.373114	0	0	0	0	0	0.570799	0	0	0	0	0	2.42035	0	0	0	2.5377	0	0	2.29246	0	0	0	0	0	0	0	0	2.3533	0
F1S4_160802_154_H01	73	#476662	Oligo L1-6 OPALIN	3	#F52D19	Non-Neuronal	0	0	0	0.624306	0	0	0	0	0	0	1.40322	0	2.52248	0	0	0	2.53019	0	0	0	2.71382	0	0	1.37054	0	0	0	0	0	0	0	0	0	2.309
F1S4_160802_093_H01	71	#665C47	Astro L1-6 FGFR3 SLC14A1	3	#F52D19	Non-Neuronal	0	0	0.165624	0	0	0	0.578143	0	0	0	0.165624	1.17401	0	0	0	0.992169	0	0	0	1.43136	2.08201	0	2.10477	0	0.578143	0	0	0	0	0	0.285233	0	0	0
F1S4_160802_133_H01	70	#6B998D	OPC L1-6 PDGFRA	3	#F52D19	Non-Neuronal	0	0	0	0	0.197412	0	0	0	0	0	0	0	0	2.21295	0	0	0	0	2.17289	2.95085	0	0	2.70733	0.197412	0	0	0	0	0	0.197412	0	0	0	0
F1S4_160802_155_H01	72	#6B8059	Astro L1-2 FGFR3 GFAP	3	#F52D19	Non-Neuronal	0	0	0	2.30109	0.232559	0.494827	0	0	0	0	0	0	0	0	1.6167	0	0	0	0	0	2.14115	0	1.94854	0.383197	0	0	2.37578	2.58533	0	0.232559	0	0	0	0
F1S4_160802_057_H01	73	#476662	Oligo L1-6 OPALIN	3	#F52D19	Non-Neuronal	0	0	0	0	0	0	0	0	0	0	0	0	0	2.28494	0	0	0	0	2.70112	0	2.94623	0	0	0	0	0	0.203889	0	0	0	2.08217	0	0	0
F1S4_160802_095_H01	71	#665C47	Astro L1-6 FGFR3 SLC14A1	3	#F52D19	Non-Neuronal	0	0	0	2.21206	0.366888	0	0	0	2.43107	0	0	0.221087	0	0	2.08801	0	2.14733	0	0	0	1.97887	0	2.83294	0	0	0	2.6445	2.32101	0	1.9066	0	0	0	1.92411
F1S4_160802_135_H01	73	#476662	Oligo L1-6 OPALIN	3	#F52D19	Non-Neuronal	0	0	0	1.05625	0.240954	1.43067	0	0	0	0	0.395019	0.791785	0	0	0	0	0	0	2.16761	1.05625	0.240954	0	0.240954	2.05016	0	0	0	0	0	0.240954	0	0	0	0
F1S4_160802_157_H01	73	#476662	Oligo L1-6 OPALIN	3	#F52D19	Non-Neuronal	0	0	0.217408	0	0	0	0	0.217408	0	0	2.84917	0	2.76237	0	0	0	0	0	2.4055	2.93511	3.35324	0	0	2.43446	0	0	0	0.217408	0	0	0	0	0	0
F1S4_160802_158_H01	72	#6B8059	Astro L1-2 FGFR3 GFAP	3	#F52D19	Non-Neuronal	0	0	0.244525	0	0.244525	0	0	0	0	0	0	2.20552	0	0	0	2.28048	0	0	0	0	2.45639	0	2.45061	0.40002	2.50724	0	2.49271	0	0	0	0	0	0	0
F1S4_160802_159_H01	73	#476662	Oligo L1-6 OPALIN	3	#F52D19	Non-Neuronal	0	0	0.228605	0	0	0.228605	0	0	0	0	0.228605	0	0	2.11809	0	0	2.44097	0	2.39624	0.377597	2.60136	0	0	1.41398	0	0	0	0	0	0	0	0	0	0
F1S4_160802_099_H01	73	#476662	Oligo L1-6 OPALIN	3	#F52D19	Non-Neuronal	0	0	0.184681	1.9029	0	1.50158	0	0	0	0	2.23997	0	0	0	0	1.00041	2.62291	0	2.01846	0.951797	2.83311	0	0	2.79313	0	0	0	0	0	0	0.413282	0	2.52763	0
F1S4_160802_060_H01	73	#476662	Oligo L1-6 OPALIN	3	#F52D19	Non-Neuronal	0	0	0	0.459145	0.211152	0	0.211152	0	0	0	2.53273	2.33397	0	0.211152	0	0	1.74895	0	1.50078	1.56453	1.7771	0	0	0	1.0661	0	0	0.989702	0.211152	0	0.211152	0	1.8244	0.211152
F1S4_160802_142_H01	70	#6B998D	OPC L1-6 PDGFRA	3	#F52D19	Non-Neuronal	0	0	0.160466	0.160466	0	0	0	0	0	0	0	0.277376	0	0	1.92269	0	0	0	2.09783	0	0	0	2.80327	0.369397	2.00101	0	0	0	0	0	0.509869	0	0	0
F1S4_160802_162_H01	73	#476662	Oligo L1-6 OPALIN	3	#F52D19	Non-Neuronal	0	0	0	0	0	2.01357	0	0	0	0	0.66391	0.886964	1.09176	0	0	0.307937	0.180708	0	2.66977	2.87252	2.83976	0	0	1.60996	0	0	2.6635	0	2.47904	0.180708	0.180708	0	2.30478	1.3842
F1S4_160802_104_H01	71	#665C47	Astro L1-6 FGFR3 SLC14A1	3	#F52D19	Non-Neuronal	0	0	0	1.56364	0	0	0	0	2.10238	0	0	0	0	0	0	0	0.210799	0	0	0	0	0	2.12125	0.210799	0	0	2.90349	1.56364	0	0.458545	0.458545	0	0	0
F1S4_160802_106_H01	71	#665C47	Astro L1-6 FGFR3 SLC14A1	3	#F52D19	Non-Neuronal	0	0	0	0.788536	0	0.196367	0	0	2.34234	0	0	1.74281	0.516768	0	1.49554	0	1.20041	0	0	0	0.196367	0	2.46707	0	1.46259	0	1.92374	0	0	0.925929	0	0	0	0.196367
F1S4_160802_165_H01	73	#476662	Oligo L1-6 OPALIN	3	#F52D19	Non-Neuronal	0	0	0	0	0	0	0	0.19275	0	0	2.36392	0	0	0	0	0	0	0	0	2.19086	2.693	0	0.19275	2.69692	0	0	0	2.54909	0	0	0	0	0	0
F1S4_160721_054_H01	73	#476662	Oligo L1-6 OPALIN	3	#F52D19	Non-Neuronal	0	0	0	0	0	0.222559	0	0	0	0	0.222559	0	0	0	1.98553	0.222559	0	0	0	0	2.41395	0	0.222559	1.97642	0	0	0	0	0.222559	2.40603	0	0	1.3099	0
F1S4_160802_067_A01	71	#665C47	Astro L1-6 FGFR3 SLC14A1	3	#F52D19	Non-Neuronal	0	0	0	2.02138	0.329829	2.28722	0	0	0.195501	0	0	0	2.11415	0	0	0	0	0	0	0	2.13995	0	1.94162	0.195501	0	0	2.56215	0	0	0.195501	0	0	0	0
F1S4_160721_056_H01	71	#665C47	Astro L1-6 FGFR3 SLC14A1	3	#F52D19	Non-Neuronal	0	0	0	1.60147	1.58179	0	0	0	0	0	2.62443	0	1.96039	0	0	1.04264	0	0	0	0	0	0	0	1.62641	0.710171	0	2.19856	0	0	0.201422	0	0	0	0
F1S4_160721_059_H01	74	#99796B	Endo L2-6 NOSTRIN	3	#F52D19	Non-Neuronal	0	0	2.08335	0	1.00444	0.205976	0	0	0	0	0	0	0	0	1.02978	0.205976	0	0	0	0.205976	2.07898	0	0	0	1.47015	0	0	2.50295	0	0	0.605764	0	0	0
F1S4_160802_072_H01	71	#665C47	Astro L1-6 FGFR3 SLC14A1	3	#F52D19	Non-Neuronal	0	0	0	0	0.225239	0.225239	0	0	0	0	0	0	0	0	0	0	0	0	0	1.12173	0	2.28942	2.18926	0	0.482757	0	2.7258	0	0	0	1.99212	0	0	1.9239
F1S4_160721_063_H01	75	#598069	Micro L1-3 TYROBP	3	#F52D19	Non-Neuronal	0	0	0	2.30085	0.258135	2.13022	0	0	0	0	0.258135	2.50964	0	0	0	0	0	0	0	0	0	0	2.58914	0.258135	0	0	0	0	0	0	0	0	0	0
F1S4_160721_065_H01	73	#476662	Oligo L1-6 OPALIN	3	#F52D19	Non-Neuronal	0	0	0	0	0.211193	0.211193	0	0	0	0	2.38402	0	0	0	0	0	0	0	0	2.77975	0	0	0.211193	0	0	0	0	0	0	0.211193	0	0	0	0
F1S4_160721_066_H01	73	#476662	Oligo L1-6 OPALIN	3	#F52D19	Non-Neuronal	0	0	0.275369	0	0	0	0	0	0	0	2.3589	0	0	0	0	1.78673	1.4114	0	0	0	2.15154	2.50832	1.06532	0.442558	0	0	0	0	0	0	0.800132	0	0	0
F1S4_160721_067_H01	75	#598069	Micro L1-3 TYROBP	3	#F52D19	Non-Neuronal	0	0	0.557659	0	0	0	0	0	0	0	0	0	0	0	0	2.51682	0	0	0	0	0.36279	0	1.18645	0.69169	0	0	0.793966	3.18392	0	0	0	0	0	2.56725
F1S4_160802_075_H01	71	#665C47	Astro L1-6 FGFR3 SLC14A1	3	#F52D19	Non-Neuronal	0	0	0	0	0.350239	1.84009	0	0	0	0	0	0	0	0	0	1.89485	0	0	0	0.209509	0	0	2.75927	0.209509	0	0	0	0	0.209509	0	0	0	0	2.15148
F1S4_160802_078_H01	73	#476662	Oligo L1-6 OPALIN	3	#F52D19	Non-Neuronal	0	0	0.211331	0	0	0	0	0	0	0	0	0	2.05383	0	0	0	2.04163	0	1.79536	0	2.3493	0	0	2.18734	0	0	0	2.8169	0	1.96913	0	0	0	0
F1S4_160802_079_E01	71	#665C47	Astro L1-6 FGFR3 SLC14A1	3	#F52D19	Non-Neuronal	0	0	0	0.654035	1.69491	0	2.05413	0	1.98105	0	0	0	0.654035	1.08316	0.654035	1.73876	0	0	0	0	0.871124	0	2.08443	0.199962	2.14302	0	2.47002	2.04735	0.523619	1.74337	1.97839	0	0	1.06166
F1S4_160831_002_H01	71	#665C47	Astro L1-6 FGFR3 SLC14A1	3	#F52D19	Non-Neuronal	0	0	0	0	1.98061	0	0	0	2.63812	0	2.39682	0	0	0	0	2.57052	0	0	0	0	0	0	2.58831	0	0	0	2.02833	0.159654	0	0	0	0	1.88884	0
F1S4_160831_008_H01	71	#665C47	Astro L1-6 FGFR3 SLC14A1	3	#F52D19	Non-Neuronal	0	0	0	0	0.606319	0.245477	0.245477	0	0	0	0.245477	0.245477	0	0	0	0	0	0	0	0.245477	0	0	2.23159	0.245477	2.12948	0	0	0	0	0.606319	0.245477	0	0	0
F1S4_160831_044_H01	70	#6B998D	OPC L1-6 PDGFRA	3	#F52D19	Non-Neuronal	0	0	0.280268	0	0.280268	0	0	0	0	0	0	0	0	0	0	0	0	0	0	2.10697	0	0	1.53265	0.16236	0	0	0	2.14665	0	1.1905	0	0	0	0
F1S4_160831_079_H01	71	#665C47	Astro L1-6 FGFR3 SLC14A1	3	#F52D19	Non-Neuronal	0	0	0.192915	1.42692	0.192915	0.326027	1.67594	0	1.76791	0	2.5256	1.26332	0	0	0	2.04817	0	0	0	0	0	0	2.28515	0.691499	1.51689	0	2.5256	0	0	0	0	0	0	1.79987
F1S4_160831_080_H01	73	#476662	Oligo L1-6 OPALIN	3	#F52D19	Non-Neuronal	0	0	0	0	0	0.172445	2.32946	0	0	0	2.53369	0	0	0	0	1.37859	2.51599	0	1.35118	1.67939	2.58942	0	0	2.91248	0	0	0	2.89666	2.30394	0.172445	0	0	0	2.61993
F1S4_160902_006_H01	70	#6B998D	OPC L1-6 PDGFRA	3	#F52D19	Non-Neuronal	0	0	0	0	0.321098	0	0	0	0	0	1.05685	2.41384	0	0	0	0	1.1668	0	0	0	2.6593	0	0	0	0	0	0	0	0	0	0	0	2.37453	0
F1S4_160721_039_H01	70	#6B998D	OPC L1-6 PDGFRA	3	#F52D19	Non-Neuronal	0	0	0	0	0	0	0	0	0	0	2.01855	0	2.23874	0	0	0	0	0	0	0	0	0	1.28111	0	1.30688	0	0	0.19975	0	0	0	0	0	0
F1S4_160721_144_H01	73	#476662	Oligo L1-6 OPALIN	3	#F52D19	Non-Neuronal	0	0	0.222568	0	0.222568	0	0	0	0	0	0.369004	0	0	0	0	0	2.89593	0	2.47357	0	2.15914	0	0.222568	2.13639	0	0	0	0	0	0	0	0	0	0
F1S4_160831_005_H01	75	#598069	Micro L1-3 TYROBP	3	#F52D19	Non-Neuronal	2.29915	0	0	0	0.363203	0.218512	0	0	0	0	0	1.34094	1.31423	0	0.218512	0	0	0	0	0	2.63145	0	2.56797	0	0	0	0	0.692271	0	0.218512	0	0	0	0
F1S4_160831_006_H01	73	#476662	Oligo L1-6 OPALIN	3	#F52D19	Non-Neuronal	0	0	0.216883	0.216883	0	2.12004	0	0	0	0	0	0	0	0	2.22893	0	0	0	0	0	1.72278	0	0.360865	0.360865	0	0	0	2.30907	0.216883	0.360865	0	0	0	0
F1S4_160831_010_H01	75	#598069	Micro L1-3 TYROBP	3	#F52D19	Non-Neuronal	0.192627	0	0.192627	0	0	0	0	0	0	0	0	0	0	0	0.192627	0	0	0	0	0	0	0	2.83023	0.192627	0	0	0	0	0	0	0	0	0	0
F1S4_160831_084_H01	70	#6B998D	OPC L1-6 PDGFRA	3	#F52D19	Non-Neuronal	0.182092	0	0.182092	0	0.182092	0	0	0	0	0	2.54469	0	1.27206	0	0	0.860365	0	0	1.44848	0.310001	1.72923	0	1.96939	0.182092	0	0	0	0.182092	0	0	0.860365	0	2.37562	0
F1S4_160831_086_H01	73	#476662	Oligo L1-6 OPALIN	3	#F52D19	Non-Neuronal	0	0	0	0	0.166915	0	0	0	0	0	0	0	0	2.2392	0	0	3.0324	0	0	2.98872	2.58736	0	0	0.287192	0	0	0	2.71386	0	3.02227	0	0	0	2.36819
F1S4_160831_049_A01	71	#665C47	Astro L1-6 FGFR3 SLC14A1	3	#F52D19	Non-Neuronal	0	0	0	0.180026	0	1.46614	0.662338	0	1.28984	0	0	0.180026	0	0	2.23694	0	0	0	0	0	0	0	1.5364	0	2.53541	0	2.40259	1.96822	0	0	2.39815	0.306918	0	0
F1S4_160902_013_H01	71	#665C47	Astro L1-6 FGFR3 SLC14A1	3	#F52D19	Non-Neuronal	0	0	0.19253	1.45233	0.19253	0	0	0.19253	2.9533	0	0.19253	0	0	0	0	0	0	0	2.48514	0	0.853486	0	1.90123	0.32546	2.40815	0	0	2.41658	1.59034	0	0.19253	0	0	0
F1S4_160902_014_H01	71	#665C47	Astro L1-6 FGFR3 SLC14A1	3	#F52D19	Non-Neuronal	0	0	0.174459	0	2.01838	0	0	0	0.298579	0	1.93466	0	0	0	0	0	0	0	2.28626	0	2.62144	0	2.23815	0.298579	0	0	0	2.73029	0.298579	0	0	0	0	0
F1S4_160831_113_H01	71	#665C47	Astro L1-6 FGFR3 SLC14A1	3	#F52D19	Non-Neuronal	0	0	0.167934	0	0	0	0	0	0	0	0	0	0	0	0	0	0	0	0	2.4129	2.43453	0	2.39511	0	2.15849	0	2.86242	0	2.6116	0	0	0	1.28806	0
F1S4_160831_014_H01	70	#6B998D	OPC L1-6 PDGFRA	3	#F52D19	Non-Neuronal	0	0	0	0	0	0.201638	0	0	0	0	2.92735	0	0	0	0	2.09308	0	0	2.67875	0	1.88441	0	1.60841	0.800575	1.84592	0	0	0	0	0.201638	0	0	0	0
F1S4_160831_054_H01	70	#6B998D	OPC L1-6 PDGFRA	3	#F52D19	Non-Neuronal	0	0	0.187034	2.24669	0	0	0	0	0	0	2.63726	0	0	0	0	0	0	0	0	0	0	0	2.66086	0	2.55634	0	0	0	2.59662	0	0	0	0	0.187034
F1S4_160831_092_H01	75	#598069	Micro L1-3 TYROBP	3	#F52D19	Non-Neuronal	2.60247	0	0	0	0.234124	0	0	0	0	0	0	0	0	0	0	0	0	0	0.234124	0	0.385409	0	0	0.385409	0.910864	0	0	2.94331	0	0.234124	0	0	0	2.09051
F1S4_160902_017_H01	71	#665C47	Astro L1-6 FGFR3 SLC14A1	3	#F52D19	Non-Neuronal	0	0	0	0	0.939489	0	0	0	2.55904	0	2.40058	0.202014	2.34035	0	0	2.02217	0	0	0	0	0	2.71188	2.24918	0	0	0	1.90506	0.939489	0	2.04363	0	0	1.12832	0
F1S4_160902_018_H01	71	#665C47	Astro L1-6 FGFR3 SLC14A1	3	#F52D19	Non-Neuronal	0	0	0	0	0	0	0	0	2.17348	0	2.19596	0	0	0	0.206681	0	0	1.31181	0	0	2.31469	0	0.206681	0	0	0	1.97985	2.12069	0	1.34891	0	1.32454	0	0
F1S4_160902_040_H01	71	#665C47	Astro L1-6 FGFR3 SLC14A1	3	#F52D19	Non-Neuronal	0	0	0.199157	0	1.36378	0.335184	0.335184	0	1.75919	0	0	0.199157	0	0	0	0.652334	0	0	1.86419	0.199157	1.67711	0	2.54777	0.199157	1.68761	0	0	0	0	0.335184	0	0	0	0
F1S4_160831_017_H01	71	#665C47	Astro L1-6 FGFR3 SLC14A1	3	#F52D19	Non-Neuronal	0	0	0	0	2.06822	0	0	0	0.341626	0	0	0	0	0	0	0.203573	0	0	0	0	2.15084	0	1.86896	0	0	0	0	0	0	0.203573	0	0	0	0
F1S4_160902_042_H01	71	#665C47	Astro L1-6 FGFR3 SLC14A1	3	#F52D19	Non-Neuronal	0	0	0	0	1.75445	0	0	0	1.35421	0	2.18593	0	1.13364	0	0	0	0	0	0	1.04932	1.98956	0	1.78544	0.20416	0	0	2.59955	0	0	0	0	0	0	0
F1S4_160831_003_H01	71	#665C47	Astro L1-6 FGFR3 SLC14A1	3	#F52D19	Non-Neuronal	0	0	0	0.579565	0.326179	1.23626	0	0	1.93481	0	1.50214	0	0	0	0	2.11298	0.193018	0	0	0	2.24035	0	2.06967	0	1.95951	0	0	0	0	0.193018	1.66585	0	0	0
F1S4_160831_004_H01	70	#6B998D	OPC L1-6 PDGFRA	3	#F52D19	Non-Neuronal	0	0	0	0	0	0	2.32674	0	0	0	0	0	0	0	0	0	0	0	0	2.28023	0.187173	0	2.38157	0.187173	0	0	0	0	0	0	2.69653	0	1.84819	0
F1S4_160831_009_H01	71	#665C47	Astro L1-6 FGFR3 SLC14A1	3	#F52D19	Non-Neuronal	0	0	0	0	0.206664	0	2.16627	0	2.64682	0	0	0	0.346117	0	0	1.45367	0	0	0	0	0.451509	0	2.28409	0.206664	0	0	0	2.65743	0	1.48074	0	0	0	0
F1S4_160831_082_H01	73	#476662	Oligo L1-6 OPALIN	3	#F52D19	Non-Neuronal	0	0	2.73276	0	0	0	0	0	0	0	0	0	0	0	0	0	0	0	0	1.53058	0	0	0	1.07104	0	0	0	3.14842	0	0.203773	0.203773	0	0	2.55369
F1S4_160831_083_H01	73	#476662	Oligo L1-6 OPALIN	3	#F52D19	Non-Neuronal	0	0	0	2.13472	0	0	0	0	0	0	0.189166	0	0	0.502888	0	0	0	0	0	0.810128	2.74303	0	0	0	0	0	0	0	2.60089	0	0	0	0	0.810128
F1S4_160902_062_H01	70	#6B998D	OPC L1-6 PDGFRA	3	#F52D19	Non-Neuronal	0	0	0	0	0	0	0	0	0	0	0	0	0	2.38402	0	0	0	0	0	0.243903	2.21018	0	2.35755	0	0	0	0	0	0.243903	2.32937	0.243903	0	0	0
F1S4_160106_037_A01	70	#6B998D	OPC L1-6 PDGFRA	3	#F52D19	Non-Neuronal	0	0	0	0	0	0	0.201586	0	0	0	0.201586	0	0	0	0	2.74063	0	0	0	0.201586	0	0	1.33594	0	0	0	0	0.800457	0	0	2.31505	0	0	0
F1S4_160106_038_A01	72	#6B8059	Astro L1-2 FGFR3 GFAP	3	#F52D19	Non-Neuronal	0	0	0	0	1.67195	0	0	0	0	0	0	0	0	1.99355	0.702647	0	0	0	0	0	2.71975	0	2.30451	0	0	0	0	0	0	2.14757	0	0	0.547352	0
F1S4_160106_039_A01	72	#6B8059	Astro L1-2 FGFR3 GFAP	3	#F52D19	Non-Neuronal	0	0	0	1.8738	0	0	0	0	0	0	0	0	0	0	0	0	0	0	0	0	0.43179	0	2.46222	0	0	0	0	0.785896	0	0	0	0	0	0
F1S4_160106_040_A01	71	#665C47	Astro L1-6 FGFR3 SLC14A1	3	#F52D19	Non-Neuronal	0	0	0	2.08877	1.92204	0	0.209732	0	0.818707	0	0	0	0	0	0	0	2.41477	0	0	0.209732	2.37572	0	2.71755	2.17608	0	0	0	0	1.58961	0.209732	0	0	2.2253	0
F1S4_160106_041_A01	70	#6B998D	OPC L1-6 PDGFRA	3	#F52D19	Non-Neuronal	0	0	0	0	0	0	0	0	0	0	0	0.226595	0.374742	0	0	0	0	0	0	0	0.226595	0	2.16296	0	0.226595	0	0	0.931193	1.8245	0.226595	0	0	0	1.63818
F1S4_160106_042_A01	72	#6B8059	Astro L1-2 FGFR3 GFAP	3	#F52D19	Non-Neuronal	0	0	0	0	0	0	0	0	0	0	0.200337	2.11767	0	0	0	0	0	0	0	0.52433	2.75283	0	2.12536	0	1.21056	0	0	0	0	0	0.59446	0	0	0
F1S4_160902_067_H01	71	#665C47	Astro L1-6 FGFR3 SLC14A1	3	#F52D19	Non-Neuronal	0	0	0	0	0.862312	0	1.71735	0	2.9714	0	0	0.278199	0	0	0	0.661841	0	0	0	0	0.278199	0	0	0.661841	2.9202	0	2.25435	0	0	0.278199	0	0	0	0
F1S4_160106_047_A01	71	#665C47	Astro L1-6 FGFR3 SLC14A1	3	#F52D19	Non-Neuronal	0	0	0	0	0	0	0	0	1.56327	0	0.196977	1.41916	0	0	0	0	0	0	0	0	2.23703	0	2.30134	0	0	0	2.6835	0	0	0	0	0	0	1.58324
F1S4_160106_051_H01	71	#665C47	Astro L1-6 FGFR3 SLC14A1	3	#F52D19	Non-Neuronal	0	0	0.188587	0	0.87653	0	0	0	0	0	0	0	0	1.64305	0	0	0	0	0	0	2.28911	0	1.50509	0	0	0	2.74097	0	0.188587	0	0	0	0	2.35331
F1S4_160106_052_H01	72	#6B8059	Astro L1-2 FGFR3 GFAP	3	#F52D19	Non-Neuronal	0	0	0.175086	0	0	0	0	0	0	0	1.2276	0	0	0	0	0	0	0	0	0.299521	2.34821	0	2.71005	0.175086	0	0	2.26767	2.24985	0	0	0	0	0	0
F1S4_160831_077_H01	70	#6B998D	OPC L1-6 PDGFRA	3	#F52D19	Non-Neuronal	0	0	0.317089	0	0.186863	0	0	0	0.186863	0	0	0	0	0	0	2.23412	0.186863	0	0	2.78508	0	0	1.29707	0	0	0	0	0	0	0	0.804596	0	0	0
F1S4_160721_001_H01	71	#665C47	Astro L1-6 FGFR3 SLC14A1	3	#F52D19	Non-Neuronal	0	0	0.208113	0	1.28877	0	0	0	2.00522	0	1.79998	2.05969	0	0	0	2.35883	0	0	0	1.82466	1.12371	0	1.96373	0	2.60868	0	2.7159	0	2.19462	0.208113	0	0	0	1.77829
F1S4_160106_053_A01	71	#665C47	Astro L1-6 FGFR3 SLC14A1	3	#F52D19	Non-Neuronal	0	0	0	0	1.97276	0	2.84492	0	0	0	1.65938	0	0.181588	0	0	1.9299	0	0	0	0	2.75026	0	2.71609	0.309249	1.45504	0	2.75106	1.20559	0	1.38667	0.826733	0	0	2.69019
F1S4_161026_103_H01	74	#99796B	Endo L2-6 NOSTRIN	3	#F52D19	Non-Neuronal	0	0	0	2.30226	0	0	0	0	0	0	0	0	0	0	0.885888	0	0	0	0	0	2.45699	0	2.30226	0.996472	0.325287	0	1.90394	2.81505	0	0	0	0	0	0
F1S4_161026_104_H01	73	#476662	Oligo L1-6 OPALIN	3	#F52D19	Non-Neuronal	0	0	0	0	2.52404	1.56686	2.37442	0	0	0	0.551846	0	0	0	1.70743	0	2.28898	0	0	2.17513	0.358244	0	0	1.09811	0	0	0	0	0	2.56531	0.358244	0	0	0
F1S4_161026_105_H01	70	#6B998D	OPC L1-6 PDGFRA	3	#F52D19	Non-Neuronal	0	0	0.298488	0	0	0	0	0	0	0	0	0	2.44976	0	1.56324	2.38231	0	0	1.39305	0	0	0	2.18806	0	0.298488	0	0	1.22565	2.61401	0	0	0	0	0
F1S4_161102_003_H01	75	#598069	Micro L1-3 TYROBP	3	#F52D19	Non-Neuronal	2.95896	0	0	0	0.367111	0	0	0	0	0	0	0	0	0	0	0	0	0	0	0	0	0	1.76443	0.800356	1.06556	0	3.09272	0.800356	0	0	0	0	0	2.5479
F1S4_161102_005_H01	71	#665C47	Astro L1-6 FGFR3 SLC14A1	3	#F52D19	Non-Neuronal	0	0	0.177546	0	1.71607	1.70756	0	0	0	0	0	0	0	0.177546	0	0	0	0	0	2.01291	1.54204	0	2.49429	0	0	0	0	0	0	0.177546	0.177546	0	0	0
F1S4_161102_006_H01	71	#665C47	Astro L1-6 FGFR3 SLC14A1	3	#F52D19	Non-Neuronal	0	0	0.173352	0	1.73225	0	2.34491	0	2.31088	0	0.173352	0	0	0	0	2.40338	0	0	0	2.50364	2.23108	0	2.45341	0	1.6865	0	1.46913	0	2.1863	0.173352	0.173352	0	0	0
F1S4_161102_108_H01	71	#665C47	Astro L1-6 FGFR3 SLC14A1	3	#F52D19	Non-Neuronal	0	0	0	0	0	0.190679	0	0	0	0	0	0.190679	0	0	0	0	0	0	2.56273	0	0	0	0.190679	0	0	0	2.49783	0	0	0	0	0	0	0
F1S4_160802_013_H01	70	#6B998D	OPC L1-6 PDGFRA	3	#F52D19	Non-Neuronal	0	0	0.226426	0	0.226426	0	0	0	0	0	0	0	0	0	0	0.226426	0	2.45275	0	0	0	0	0.484723	0.374501	0	0	0	0	0	0	1.83292	0	0	2.99346
F1S4_161026_026_H01	72	#6B8059	Astro L1-2 FGFR3 GFAP	3	#F52D19	Non-Neuronal	0	0	0	2.1786	1.07172	1.55542	0	0	0	0	0	0	1.11613	0	0	0	0	0	0	0	2.5644	0	0.866307	0.463161	0	0	0	0	0	2.5308	0	0	0	2.77341
F1S4_161026_155_A01	73	#476662	Oligo L1-6 OPALIN	3	#F52D19	Non-Neuronal	2.44386	0	0	0	0.290732	0	0	0.169253	0	0	2.92538	0	2.15971	0	0.385552	0	2.39588	0	0	1.61813	2.9019	0	0	0	0	0	0.169253	0	0.169253	0.169253	0	2.61418	0	0
F1S4_161102_138_H01	71	#665C47	Astro L1-6 FGFR3 SLC14A1	3	#F52D19	Non-Neuronal	0	0	0	0	1.85619	0	0	0.769632	2.5187	0	0.295939	0.391823	2.08675	0	0	0	0	0	0	0.836333	2.09705	0	1.03209	0	0	0	2.45518	0	0	1.96068	0	0	0	0.172704
F1S4_161026_060_H01	70	#6B998D	OPC L1-6 PDGFRA	3	#F52D19	Non-Neuronal	0	0	0	0	0.155742	0	1.55556	0	2.7869	0	2.96974	0	0	0	1.61399	0	0	0	0	0.155742	0	0	1.27149	0	0	0	0	0.360595	0	0	0	0	0	0
F1S4_161102_140_H01	71	#665C47	Astro L1-6 FGFR3 SLC14A1	3	#F52D19	Non-Neuronal	0	0	0	1.78137	0.367522	0	0	0	0	0	1.85453	0	0	0	0	0	0	0	0	0	0	0	2.28376	0.159456	0	0	1.68546	0	0	0.159456	0	0	0	2.80546
F1S4_161102_141_H01	71	#665C47	Astro L1-6 FGFR3 SLC14A1	3	#F52D19	Non-Neuronal	0	0	0.229659	0	0.861665	0.229659	0	0	0	0	0	0.578368	0	0	0	0	0	0	0	1.1743	0	0	0.651719	0	0	0	1.94846	0	0	0	0	0	0	0
F1S4_161026_039_H01	75	#598069	Micro L1-3 TYROBP	3	#F52D19	Non-Neuronal	0	0	0	0	2.14468	0	0	0	0	0	0.273419	0	0	0	0	0	0	0	2.05731	0.796631	0	0	0	0	0.273419	0	0	2.401	0	0	0	0	0.273419	3.07038
F1S4_161026_063_H01	70	#6B998D	OPC L1-6 PDGFRA	3	#F52D19	Non-Neuronal	0	0	0.233475	0	0	0	0	0	0	0	2.87952	0	0	0	0	0	0.233475	0	0	2.03541	0	0	0	0.233475	0	0	0	0	0	0.233475	2.38568	0	0	0
F1S4_161026_157_H01	73	#476662	Oligo L1-6 OPALIN	3	#F52D19	Non-Neuronal	0	0	0	0	0.248478	0	0	2.65354	0	0	1.42288	2.05288	0	0	0	0	2.24615	0	0	0	2.23653	0	0	0.520637	0	0	0	0	0	0.248478	0.248478	2.98152	0	2.53041
F1S4_161102_142_H01	73	#476662	Oligo L1-6 OPALIN	3	#F52D19	Non-Neuronal	0	0	0.267942	0	0	0	0	0	0	0	0	0	0	0	0	0	2.69838	0	0	1.98865	0	0	0	0	0	0	0	0	0	0	0	0	0	0
F1S4_161026_065_H01	70	#6B998D	OPC L1-6 PDGFRA	3	#F52D19	Non-Neuronal	0	0	0	0	0.231495	0	0	0	0.821696	0	1.69533	0	1.88673	0	2.3996	2.70341	0	0	0	0	0	0	2.08923	0	1.9663	0	0	0	0	1.90232	0	0	0	0
F1S4_161102_147_H01	70	#6B998D	OPC L1-6 PDGFRA	3	#F52D19	Non-Neuronal	0	0	0	0	0.841741	2.30195	0.163577	0	0	0	2.10618	0	0	0	0	0	0	0	0	0.163577	0	0	2.32322	0	0	0	0	0	0.28212	1.37785	0.375147	0	0	0
F1S4_161102_148_H01	71	#665C47	Astro L1-6 FGFR3 SLC14A1	3	#F52D19	Non-Neuronal	0.313843	0	0.184675	0.976765	0.313843	0	2.66915	0	2.60726	0	0.562258	0	0	0	0	0	0	0	0	0	1.55601	0	2.68843	0	0.494122	0	2.71761	1.86689	0.184675	0.313843	0	0	0	0
F1S4_161102_153_H01	70	#6B998D	OPC L1-6 PDGFRA	3	#F52D19	Non-Neuronal	0	0	0	0	0	0	0	0	0	0	0	1.74904	0	0	0	0	0	0	0	0	1.89362	0	2.01466	0.342038	0	0	0	0	2.1031	0.203856	0	0	0	0
F1S4_161102_154_H01	73	#476662	Oligo L1-6 OPALIN	3	#F52D19	Non-Neuronal	0	0	0	0	0.209324	0.209324	0	0	0	0	0	0.349971	0	0	0	0	0	0	0	0	0	0	0.209324	0.209324	0	0	0	0	0	0	0	0	2.02645	0
F2S4_161123_008_A01	71	#665C47	Astro L1-6 FGFR3 SLC14A1	3	#F52D19	Non-Neuronal	0	0	0	0	0	0	0	0	2.16899	0	2.18192	0.214115	0	0	2.17273	1.9491	0	0	0	0	0	0	2.35888	0	1.94283	0	0	1.27515	0.356886	0.214115	0	0	0	0
F2S4_161123_010_H01	71	#665C47	Astro L1-6 FGFR3 SLC14A1	3	#F52D19	Non-Neuronal	0	0	0	0	0.301588	0	0	0	1.32328	0	0	0	0	1.68233	0	1.84308	0	0	0	0.176463	2.09453	0	2.41525	1.70866	0	0	2.67505	1.97423	0.176463	0.176463	0.176463	0	0	0
F2S4_161123_077_H01	70	#6B998D	OPC L1-6 PDGFRA	3	#F52D19	Non-Neuronal	0	0	0	0	0	0.239112	0	0	0	0	2.47261	0	0	2.16111	2.5355	0	0	0	0	0	0	0	0	0	2.2129	0	0	0	0	0.239112	0	0	0	0
F2S4_161123_108_H01	70	#6B998D	OPC L1-6 PDGFRA	3	#F52D19	Non-Neuronal	0	0	0.361253	0	0	0.361253	1.75429	0	0	0	0	2.10331	1.93113	0	1.72874	0	0	0	0	0.217153	2.33522	0	2.41363	0	0	0	0	2.63915	0	0	0	0	0	0
F2S4_161123_109_H01	73	#476662	Oligo L1-6 OPALIN	3	#F52D19	Non-Neuronal	0	0	0	0	0.232017	0	0	0	0	0	0	0	0	0	0	0	2.80141	0.232017	0	2.8715	2.10033	0	0	1.79543	0	0	0	0	0	0	0	0	0	0
F1S4_160831_129_H01	73	#476662	Oligo L1-6 OPALIN	3	#F52D19	Non-Neuronal	0	0	0	2.19011	0.33479	0	0	0	0	0	3.0558	2.73427	2.53764	0	0	0	2.55625	0	1.84584	0	2.98955	0	0	2.81083	0	0	0	0	0	0	0	0	2.23347	1.12049
F1S4_161102_159_H01	73	#476662	Oligo L1-6 OPALIN	3	#F52D19	Non-Neuronal	0.236923	0	0.236923	0	0.389355	0	0	0	0	0	0	0	0	0	0	0	2.64053	0	0	0	2.56599	0	0	0.389355	0	0	0	0	0.665361	0	0	0	0	0
F2S4_161123_001_F01	72	#6B8059	Astro L1-2 FGFR3 GFAP	3	#F52D19	Non-Neuronal	0	0	0	0	2.07106	0	2.22666	0	0	0	2.62933	0.207204	0	0	0	0	0	0	0	0	0.669169	0	1.43601	0.207204	0	0	2.59497	0	0	0	0	0	0	2.80695
F1S4_160831_131_H01	73	#476662	Oligo L1-6 OPALIN	3	#F52D19	Non-Neuronal	0	0	0	0	0.371093	0	0	0	0	0	0.224032	1.18117	0	0	0	1.01916	1.50587	0	0	2.6596	2.2834	0	0	3.05167	0	0	0	2.52437	0	0	0	0	0	0
F1S4_160831_132_H01	73	#476662	Oligo L1-6 OPALIN	3	#F52D19	Non-Neuronal	0	0	0.310242	0	2.10087	0	0	0	0	0	0.919085	0	0	0	0	0	0	0	0	0	1.16308	0	0	2.74165	0	0	0	0	1.85048	0	0	0	0	0
F2S4_161123_012_H01	72	#6B8059	Astro L1-2 FGFR3 GFAP	3	#F52D19	Non-Neuronal	0	0	0	0	0.209555	0.209555	1.3441	0	0	0	0	0	0	0	0	0	0	0	0	0	0	0	2.33359	0	0	0	0	2.492	0	0.456434	2.14393	0	0	0
F2S4_161123_013_H01	71	#665C47	Astro L1-6 FGFR3 SLC14A1	3	#F52D19	Non-Neuronal	0	0	0	1.032	2.59283	0.700769	0	0	2.93869	0	0	1.94316	0	0	0	0	0	0	0	2.38733	2.3387	0	0	0	0	0	0	0	0	0.197113	0	0	0	0
F2S4_161123_014_H01	71	#665C47	Astro L1-6 FGFR3 SLC14A1	3	#F52D19	Non-Neuronal	0	0	0	0	1.74624	0	0	0	1.93584	0	0	0	0	0	0	0	0	0	0	2.66326	0	0	2.87583	0.446391	2.23434	0	0	0	0	0	0	0	0	0
F1S4_160831_133_H01	71	#665C47	Astro L1-6 FGFR3 SLC14A1	3	#F52D19	Non-Neuronal	0	0	0	0.999501	2.57809	1.36496	0	0	1.97258	0	1.80563	0	0	0	0	0	0.203912	0	0	0	0.601644	0	2.69911	0	0	0	0	0	0	0.34212	0	0	0	0.999501
F2S4_161123_004_H01	72	#6B8059	Astro L1-2 FGFR3 GFAP	3	#F52D19	Non-Neuronal	0	0	0	0	0	0	0	0	0	0	0	0	0	0	0	0	0	0	2.28433	2.55525	0	0	2.74436	0	0	0	2.9269	0	0	0	0	0	0	0
F1S4_160831_136_H01	73	#476662	Oligo L1-6 OPALIN	3	#F52D19	Non-Neuronal	0	0.19437	0	2.2107	0	0	0	0	0	0	0.19437	0	0	0	0	0	2.4683	0	0	0	2.33117	0	0	2.58909	0	0	0	0.19437	0	0.19437	0.328168	0.19437	0	0
F2S4_161123_006_H01	72	#6B8059	Astro L1-2 FGFR3 GFAP	3	#F52D19	Non-Neuronal	0	0	0.219739	0	2.17372	0	0	0	0	0	0.880008	0	0	0	0	0	0	0	0	0	0.219739	0	0.560429	0	0	0	0.219739	0	0	0	0	0	2.43195	0.219739
F2S4_161123_113_H01	73	#476662	Oligo L1-6 OPALIN	3	#F52D19	Non-Neuronal	0	0	0	0	0.231889	1.27047	0	0	0	0	0	0	0	0	0.231889	2.00519	0	0	0	0	0	0	0	0.231889	0	0	0	0	0	0	0	2.31459	0	0
F1S4_160831_040_H01	71	#665C47	Astro L1-6 FGFR3 SLC14A1	3	#F52D19	Non-Neuronal	0	0	0.330806	1.1323	0.645992	0	0	0	3.05846	0	0	0.330806	0	0.330806	0	2.80262	0.330806	0	2.08244	0	0	0	2.50305	0.745679	0	0	0	0	0	0.516386	0.330806	0	0	0.330806
F1S4_160831_068_G01	71	#665C47	Astro L1-6 FGFR3 SLC14A1	3	#F52D19	Non-Neuronal	2.18338	0	2.30591	2.91769	1.05155	1.62368	0	0	1.94747	0	2.06533	0	0	2.15072	0	1.81769	0	0	0.758576	2.61345	2.55357	0	2.52281	0	2.54291	0	0.814569	0.252674	1.48005	0	0	0	0	1.73143
F1S4_160831_068_H01	73	#476662	Oligo L1-6 OPALIN	3	#F52D19	Non-Neuronal	0.18658	0	0.31667	0	0	0	0	0	0.18658	0	1.72474	0	1.57396	0.18658	0	0.18658	0	0	0	0	2.15924	0	0.18658	2.47934	0	0	0	0	0	0	0	0	0	2.67115
F1S4_160831_069_H01	75	#598069	Micro L1-3 TYROBP	3	#F52D19	Non-Neuronal	0	0	0	0	0	0	0	0	0	0	0.376848	0.228077	0	0	0	0	0	0	0	0	0	0	1.5832	0	0.228077	0	2.87211	0.228077	2.8918	0	0.376848	0	0.228077	0
F1S4_160831_120_H01	70	#6B998D	OPC L1-6 PDGFRA	3	#F52D19	Non-Neuronal	0	0	0.239041	0	0.837066	0	0.239041	0	0	0	0.392333	0.239041	0	0	1.75421	1.89246	0	1.49266	0	0.239041	0.392333	0	1.30283	0.392333	0	0	0	2.36723	0.239041	0.239041	0.392333	0.239041	0	0.239041
F1S4_160831_121_H01	70	#6B998D	OPC L1-6 PDGFRA	3	#F52D19	Non-Neuronal	0	0	0.178022	0	2.07944	0	1.654	0	0	0	0.850045	0.401409	0	0.178022	1.72582	0	0	0	2.00134	2.29242	1.34793	0	2.05299	0	0	0	0.178022	0	0.401409	0.178022	0.178022	0.178022	0	0.178022
F1S4_160902_083_H01	75	#598069	Micro L1-3 TYROBP	3	#F52D19	Non-Neuronal	2.27068	0	0.412539	0	0.253516	0	0	0	0	0	0	0	0	0	1.11029	0	0	0	0	0.253516	0.253516	0	2.49048	0.528686	0	0	0	0	0.253516	0	2.80236	0	0	0
F1S4_160831_037_H01	75	#598069	Micro L1-3 TYROBP	3	#F52D19	Non-Neuronal	2.07813	0	0.513371	0	0	0	0	0	0	0	1.09011	2.95957	0	0	0	0	0	0	0	0.328497	0.642636	0	0.513371	0.513371	0	0	3.34686	0	0	0	0	0	0	0
F1S4_160831_070_H01	70	#6B998D	OPC L1-6 PDGFRA	3	#F52D19	Non-Neuronal	1.33667	0	0.468583	0	0	0.216746	0	0	0	0	0.216746	1.53976	0	0.216746	0	1.46948	0.216746	0	0.216746	0.216746	0.468583	0	2.41151	0	0	0	0.216746	2.55732	2.05789	0.688703	1.74323	0	1.74323	0
F1S4_160831_071_H01	73	#476662	Oligo L1-6 OPALIN	3	#F52D19	Non-Neuronal	0	0	0.793658	1.96352	0.600076	0	0	0	0	0	1.74365	2.39269	2.50924	0.241906	0	2.1333	2.82971	0	2.68954	1.08571	2.34858	0	0.396354	0	0	0	0.241906	2.2744	0	2.31229	0	0	0.241906	1.83781
F1S4_160902_043_H01	70	#6B998D	OPC L1-6 PDGFRA	3	#F52D19	Non-Neuronal	0	0	1.58205	0	0.354296	0.212318	0	0	0	0	0	2.69598	0.212318	0	0	0.212318	0	0	0	0	2.98368	0	2.57243	0	0	0	0	0	0	0.354296	0	0	2.44371	0
F1S4_160902_085_H01	73	#476662	Oligo L1-6 OPALIN	3	#F52D19	Non-Neuronal	0	0	0.966259	0.227297	1.24316	0	0	0	0	0	0	0	0	0	0	0	1.50443	0	2.63221	1.33508	2.48229	0	0.7098	2.6329	0.227297	0	0.227297	0	1.22576	0.37574	0	0	0	0
F1S4_160902_086_H01	73	#476662	Oligo L1-6 OPALIN	3	#F52D19	Non-Neuronal	0	0	0.530098	1.33659	0.254403	0	0	0	0	0	0.254403	0.254403	0.254403	0	0	0	0	0	2.81667	0	3.00159	0	2.58441	0.254403	0.413769	0	0	2.18275	0.254403	2.03549	0	0	2.50886	0
F1S4_160902_087_H01	73	#476662	Oligo L1-6 OPALIN	3	#F52D19	Non-Neuronal	0	0	0.624641	0.256085	0.416098	0	0	0	0	0	1.11563	0	2.58998	0	0	0	1.53069	0	0.256085	0	2.20864	0	3.03597	0.416098	0	1.69198	0	0.256085	2.75693	2.65329	0	0.416098	0	0
F1S4_160902_088_H01	70	#6B998D	OPC L1-6 PDGFRA	3	#F52D19	Non-Neuronal	0	0	0.818716	0	0	2.39406	0	0.285836	0	0	0.285836	2.14537	0	0.285836	1.36828	2.17877	0	0.285836	0	0	0.456742	0	2.78668	1.17518	0	0	0	1.36828	0	0.285836	0	0	0	1.80204
F1S4_160831_039_H01	70	#6B998D	OPC L1-6 PDGFRA	3	#F52D19	Non-Neuronal	0	0	0.553582	1.85662	0.216002	0	0	0.216002	0	0	1.62573	0	0	0	0	0	0	0	0.3596	2.41719	0.216002	0	2.15265	0.216002	0	0	0	1.12199	2.34891	1.64516	0.216002	0	0.216002	2.12836
F1S4_160831_073_H01	70	#6B998D	OPC L1-6 PDGFRA	3	#F52D19	Non-Neuronal	0.186771	0	0.416979	2.3957	0	0	1.51459	0	0	0	0.316953	2.19543	2.55882	0	0.186771	0	0	0	2.43514	2.21293	2.6256	0	2.07829	0	0	0	0	0	0	0.186771	2.64505	0	0.186771	0
F1S4_160831_122_H01	70	#6B998D	OPC L1-6 PDGFRA	3	#F52D19	Non-Neuronal	0	0	0.670143	0.239495	0.239495	0	0	0	0	0	0.239495	0.239495	0	0	0	0	0.239495	0.239495	2.34294	0	0.239495	0	1.63286	0	0	0	0	0.239495	0	1.68865	0	0	0	0
F1S4_160902_046_H01	73	#476662	Oligo L1-6 OPALIN	3	#F52D19	Non-Neuronal	0	0	0.63531	0	1.2286	0.221063	0.221063	0	0	0	0	0.221063	1.51661	0	0	0	0	0	0	2.16536	0	0	0	0.562842	0.221063	0	0	0	0	0.221063	0	0	0	0
F1S4_160902_091_H01	70	#6B998D	OPC L1-6 PDGFRA	3	#F52D19	Non-Neuronal	0	0	0.598535	2.45168	0.241027	0	2.44014	0.241027	0	0	0.736516	0	0	0	0.241027	0	0	0	0	0.395122	0.241027	0	0	0	1.62887	0	0	0	0	0.395122	0.241027	0	0	0
F1S4_160902_092_H01	70	#6B998D	OPC L1-6 PDGFRA	3	#F52D19	Non-Neuronal	0.269544	0	0.72433	0.434611	0.647435	0	0	0	0	0	0.269544	0.72433	0.269544	0	0	0.269544	0	0	0	0.269544	2.32579	0	1.26013	0.269544	0.896585	0	0	1.78067	0	1.35225	0	0	0	0
F1S4_160831_074_H01	73	#476662	Oligo L1-6 OPALIN	3	#F52D19	Non-Neuronal	0	0	0.260811	2.44721	0	0	0	0	0	0	0.260811	0	3.32879	0	0	0.260811	2.91815	0	0	0	3.17796	0	0.260811	2.74554	0	0	0	0	0	0.422624	0	0	0	0.260811
F1S4_160831_124_H01	75	#598069	Micro L1-3 TYROBP	3	#F52D19	Non-Neuronal	2.13117	0	0	2.4344	0	0.252798	0.864404	0	0.252798	0	1.67758	0	0.618999	0	0	0.252798	0	0	0	3.03809	2.5897	0	0	0.252798	0.252798	0	0	0.252798	0	0	0	0	0	0
F1S4_160902_051_H01	71	#665C47	Astro L1-6 FGFR3 SLC14A1	3	#F52D19	Non-Neuronal	0	0	0.457848	0	0.210388	0	0	0	2.3205	0	0	0.210388	0	0	0	0	0.35151	0	0	0	2.12631	0.210388	2.38081	0.210388	1.75659	0	1.50736	1.73221	0	0	0.35151	0	0	2.39303
F1S4_160902_052_H01	73	#476662	Oligo L1-6 OPALIN	3	#F52D19	Non-Neuronal	0	0	0.659898	0	0.234001	0	0	0	0	0	2.14902	0	0	0.234001	0	0.777987	0.980801	0	0	0	1.98208	0	1.83776	2.27921	0	0	0	0	0.234001	0.385235	1.01206	0	0	0
F1S4_160902_096_H01	73	#476662	Oligo L1-6 OPALIN	3	#F52D19	Non-Neuronal	0.220468	0	0.220468	0	0	0.220468	0	0	0	0	0.220468	0	0.220468	0	0.881599	0	2.56121	0	0	2.6139	2.32221	0	0	1.77715	0.220468	0	0	0	0	2.72813	0	0	0	0.220468
F1S4_160831_125_H01	73	#476662	Oligo L1-6 OPALIN	3	#F52D19	Non-Neuronal	0	0	0.367268	1.72306	0	0	0	0.221353	0	0	0	0.221353	0	0.221353	0	0	2.13969	0.221353	0.221353	2.59828	2.80016	0	0	2.84448	0	0	0	1.36054	0	0	0	0	0	0.221353
F1S4_160831_126_H01	70	#6B998D	OPC L1-6 PDGFRA	3	#F52D19	Non-Neuronal	0	0	0.558851	0	0.218876	1.942	0	0	0	0	0.218876	0.218876	2.37578	0	0	0	0	0	0.218876	0	2.11426	0	1.6125	0.218876	0.218876	0	0.218876	2.65562	0.218876	0.218876	0	0	0	1.16912
F1S4_160902_053_H01	73	#476662	Oligo L1-6 OPALIN	3	#F52D19	Non-Neuronal	0	0	0.848634	1.95067	0	0	0	0	0	0	2.11372	0	2.74346	0	0	2.19762	2.63541	0	0.270753	0	0.98467	0	0.436264	2.27991	0	0	0.270753	0.436264	0	1.49535	0	0.649459	2.18307	0
F1S4_160902_054_H01	71	#665C47	Astro L1-6 FGFR3 SLC14A1	3	#F52D19	Non-Neuronal	0	0	0.663691	0.500502	2.2466	0	0	0	0	0	0	0	0	0	0	2.0874	0	0	0	0.236028	2.5587	0	1.65361	0.236028	0	0	2.59523	0.236028	1.99646	0.388094	0.236028	0	0	0
F1S4_160902_055_H01	71	#665C47	Astro L1-6 FGFR3 SLC14A1	3	#F52D19	Non-Neuronal	0	0	0.365326	0.365326	0.560895	0	0	0	1.03717	0	0.219995	0	0	0	2.02206	0	0.219995	0	0	2.18758	0.219995	0	2.40867	0.219995	0.474027	0	2.53985	0.365326	0	1.35728	2.05102	0	0	0
F1S4_160902_097_H01	71	#665C47	Astro L1-6 FGFR3 SLC14A1	3	#F52D19	Non-Neuronal	0	0	0.919519	0	0.221259	0.367133	2.4742	0.221259	0	0	0	0	0.221259	0	0	0.221259	0	0	0.221259	0	1.67677	0	1.9639	0.367133	0	0	0	0	2.35583	0	0	0	0	0
F1S4_160902_099_H01	73	#476662	Oligo L1-6 OPALIN	3	#F52D19	Non-Neuronal	0.239618	0	0.506345	0.393144	0.239618	1.05338	0	0	0	0	1.68893	0	0	0	0	0	1.75554	0	2.2332	0	2.62471	0	2.11589	0.239618	0	0	0	2.64833	2.51084	0	0	0	0.393144	0
F1S4_160902_100_H01	73	#476662	Oligo L1-6 OPALIN	3	#F52D19	Non-Neuronal	0	0	0.562137	2.50806	0.220676	0	0.220676	0.220676	0	0	2.10542	2.08934	2.63821	0	0	0.220676	2.34797	0	0	1.26046	2.74603	0	0	0.475165	0	0	0	0.562137	0	0.220676	0	0	0	0
F1S4_160902_059_H01	75	#598069	Micro L1-3 TYROBP	3	#F52D19	Non-Neuronal	0	0	0.523423	0	0	0	0	0	0	0	0	0	0	0	0	0	0	0	0	0	0	0	3.03785	0.250218	0.753968	0	0	3.20196	0.407958	0	0	0	0	0.250218
F1S4_160902_061_H01	70	#6B998D	OPC L1-6 PDGFRA	3	#F52D19	Non-Neuronal	0.210337	0	0.777031	0.351436	0	0	0	0	0	0	0.210337	1.30782	0	0	0	0	0	0	0	2.61382	0	0.210337	2.44251	0.210337	0	0	0	1.88657	0	0	0.351436	0	2.30856	0.210337
F2S4_161123_016_H01	71	#665C47	Astro L1-6 FGFR3 SLC14A1	3	#F52D19	Non-Neuronal	0	0	0	1.55038	0	0	0.224457	0	1.70822	0	0.224457	0.48146	0	0	0	1.84943	0.224457	0	0	0.569003	0	0	2.23434	0.224457	2.88673	0	0.850669	1.92897	0	0	0	0	0	2.15361
F2S4_161123_018_B01	72	#6B8059	Astro L1-2 FGFR3 GFAP	3	#F52D19	Non-Neuronal	0	0	0	0	0	0	0.187166	0	0	0	1.88016	0	0	0	0	0	0.187166	0	0	2.94857	0	0	2.45225	0	2.65714	0	0	1.56933	0	0.187166	0	0	0	2.59223
F2S4_161123_018_H01	74	#99796B	Endo L2-6 NOSTRIN	3	#F52D19	Non-Neuronal	0	0	0.255413	0	0	0	1.77991	0	0	0	0	0.531703	0	2.1	0	0	2.27493	0	0	0	0	0	2.0685	0	0	0	2.22407	2.7499	0	0	0.255413	0	0	0
F2S4_161123_019_H01	71	#665C47	Astro L1-6 FGFR3 SLC14A1	3	#F52D19	Non-Neuronal	0	0	0	0	2.65887	1.36424	0	0	0	0	0	0	0	0	0	0	0	2.27811	1.96315	0	0	0	2.48767	0.199333	0	0	2.40447	2.5931	0	2.27409	2.61143	0	1.20801	0
F1S4_160831_139_H01	73	#476662	Oligo L1-6 OPALIN	3	#F52D19	Non-Neuronal	0	0	0	0	2.63837	0.308146	0	0	0	0	0	0	0	0	0	0	0	0	0	0	0	0	0	1.46078	0	0	0	0	0	0	0	0	0	0
F2S4_161123_020_H01	73	#476662	Oligo L1-6 OPALIN	3	#F52D19	Non-Neuronal	0	0	0	0	0.447685	0	0	0	0	0	0	0	0	0	0	0	0	0	0	2.33907	0	0	0	1.41909	0	0	0	2.10768	0	0.279142	0	0	1.94677	2.04181
F2S4_161123_022_H01	71	#665C47	Astro L1-6 FGFR3 SLC14A1	3	#F52D19	Non-Neuronal	0	0	0	0	0.464781	0	0	0	2.55851	0	0	0	0	0	1.15871	0	0	0	0	0	2.50299	0	0	0	0	0	0.86844	0	0	0	0	0	0	0
F2S4_161123_024_H01	70	#6B998D	OPC L1-6 PDGFRA	3	#F52D19	Non-Neuronal	0	0	0	0	0	0	0	0.225232	0	0	2.6702	0	0	0	0	1.8212	0	0	0	0	0	0	1.87162	0	2.71964	0	0	0.225232	2.70707	0.570404	0	0	0	0
F2S4_161123_026_H01	72	#6B8059	Astro L1-2 FGFR3 GFAP	3	#F52D19	Non-Neuronal	2.0914	0	0.916387	0	1.64035	0.416778	0	0.256577	0	0	2.69436	1.78821	1.59835	0	0	0	0	0	0	0	0	0	2.50507	0	0	0	0	2.21828	0	0	2.34097	0	0	2.40051
F2S4_161123_029_H01	72	#6B8059	Astro L1-2 FGFR3 GFAP	3	#F52D19	Non-Neuronal	0	0	0	0.327496	0.193913	0	0	0	0	0	0	1.06796	0	0	0	2.22573	0	0	0	2.73526	0	0	0.919959	1.49683	0	0	2.58275	0.193913	0	0	0	0	0	0
F2S4_161123_048_H01	73	#476662	Oligo L1-6 OPALIN	3	#F52D19	Non-Neuronal	0	0	0.203972	0	0.203972	0	0	0	0	0	2.98557	0.446905	0	0	0	0	0.203972	0	0	0	2.38913	0	0	0	0	0	0	2.70238	0	0.203972	0	2.71108	0	0
F2S4_161123_049_H01	70	#6B998D	OPC L1-6 PDGFRA	3	#F52D19	Non-Neuronal	0	0	0.184789	0.184789	1.7655	0	0	0	0	0	0	0	0	0	0	0	0	0	1.82797	0	0	0	2.77334	0	0	0	0	0.562498	0	0.76141	0.494347	0	0	0
F2S4_161123_051_H01	73	#476662	Oligo L1-6 OPALIN	3	#F52D19	Non-Neuronal	0	0	0	0	2.78544	2.37975	0	0	0	0	0	0	0	0	0	0	0	0	0	3.05295	0	0	0	0	0	0	0	0	0.253621	0	0	0	0	0
F2S4_161123_052_H01	75	#598069	Micro L1-3 TYROBP	3	#F52D19	Non-Neuronal	0	0	0.250198	0.250198	0	0	0	0	0	0	0.250198	0	0	0	0	0	0	0	0	0	0	2.28828	0.250198	0	1.59301	0	2.5412	0.250198	0	0.250198	0	0	0.250198	0
F2S4_161123_082_H01	73	#476662	Oligo L1-6 OPALIN	3	#F52D19	Non-Neuronal	0	0	0	2.56021	0	0	0	2.4274	0	0	0	0	0	0	0	0	0	0	0	0	0	0	0.277482	2.43029	0	0	0	2.20469	0	0.277482	0	0	0.277482	0
F1S4_161129_001_H01	71	#665C47	Astro L1-6 FGFR3 SLC14A1	3	#F52D19	Non-Neuronal	0	0	0.446044	1.65248	0.277933	0	0	0	1.64373	0	0.446044	0	0	0	0	0	0	0	0	0	0	0	2.54813	0.277933	2.0896	0	0	0	0	1.81652	0	0	0.446044	0
F1S4_161129_002_H01	72	#6B8059	Astro L1-2 FGFR3 GFAP	3	#F52D19	Non-Neuronal	0	0	0.221446	2.29785	0	0	0	0	0	0	0	0.47645	0	0	0	0	0	0	0.221446	0	2.3846	0	0.698164	0	0	0	2.91334	0.221446	0.221446	0.221446	0.844235	0	0	0
F1S4_161129_008_H01	71	#665C47	Astro L1-6 FGFR3 SLC14A1	3	#F52D19	Non-Neuronal	0	0	0	0	0.496062	1.65071	0	0	0	0	0	0	0	0	0	1.06702	0	0	0	0.315312	0	0	2.73902	0	0	0	0	0	0	1.86656	0	0	0	2.53857
F1S4_161207_002_H01	75	#598069	Micro L1-3 TYROBP	3	#F52D19	Non-Neuronal	0	0	0	0	1.94495	0	0	0	0	0	0	0	0	0	0	2.25271	0	0	0	0	0	0	0	0	0	0	0	0	0	0	0	0	0	0
F2S4_161123_054_H01	73	#476662	Oligo L1-6 OPALIN	3	#F52D19	Non-Neuronal	0	1.19302	0.404226	0.404226	2.75254	0	0	0	0	0	0	0	0.404226	0	0	0	0	0	0	0.247537	2.98631	0	0	0	0	0	0	2.77327	0	0	0	0	0	0
F1S4_161129_003_H01	71	#665C47	Astro L1-6 FGFR3 SLC14A1	3	#F52D19	Non-Neuronal	0	0	0.355967	0	1.48908	0	0	0	0.213477	0	0	2.54663	0	0	0	0	2.50902	0	0	0	2.3086	0	2.33743	0	0	1.59207	2.43973	2.15015	0	0	0	0.213477	0	2.21019
F1S4_161129_004_H01	73	#476662	Oligo L1-6 OPALIN	3	#F52D19	Non-Neuronal	0	0	0	0	1.21767	0	0	0	0	0	0	2.46438	0	0	0	0	0	0	2.54502	0	2.18363	0	0	0.269864	0	0	0	3.13888	0	0	0.647972	0	0	0
F2S4_161123_085_H01	73	#476662	Oligo L1-6 OPALIN	3	#F52D19	Non-Neuronal	0	0	0	0	0	0.311189	0	0	0	0	0	0	0	0	0	2.37411	0	0	0	0	2.24786	0	0	0	0	0	0	0	2.37025	0	0	0	0.311189	0
F2S4_161123_116_B01	73	#476662	Oligo L1-6 OPALIN	3	#F52D19	Non-Neuronal	0	0	0	0	2.61416	0.234849	0	0	0	0	0	0	0	0	0	0	2.52072	0	0	0	2.4845	0	0.234849	2.78482	0	0	0	2.45493	0	0	0	0	0	0
F1S4_161129_006_H01	72	#6B8059	Astro L1-2 FGFR3 GFAP	3	#F52D19	Non-Neuronal	0	0	0.233418	0	2.57277	2.52934	0	0	0.496235	0	0	0	0	0	0	0	0	0	0	0.825639	2.03241	0	1.87099	0	0	0	1.89131	2.7915	0	0.233418	2.17326	0	0	1.6261
F1S4_161129_078_H01	75	#598069	Micro L1-3 TYROBP	3	#F52D19	Non-Neuronal	0	0	0.399375	0.244064	0	0	0	0	0	0	1.5142	0	0	0	0	0	0	0	0	0.968273	0	0	0	0	0	0	0	0	0	0	0	0	2.65074	0
F2S4_161123_037_H01	73	#476662	Oligo L1-6 OPALIN	3	#F52D19	Non-Neuronal	0	0	0.207248	0	2.30051	0	0	0	0	0	0	0	0	0	0	0	0	0	0	0.207248	2.48248	0	0	0.207248	0	0	0	0	0	0	0	0	0	0
F2S4_161123_038_H01	72	#6B8059	Astro L1-2 FGFR3 GFAP	3	#F52D19	Non-Neuronal	0	0	0.229282	0	0.229282	0	0	0	0	0	0.229282	0	0	0	0	0	0.229282	0	1.45966	1.24774	0	0	1.98036	0	0	0	2.56934	1.41557	0.577693	0	0	0	0	0.229282
F2S4_161123_039_H01	71	#665C47	Astro L1-6 FGFR3 SLC14A1	3	#F52D19	Non-Neuronal	0	0	0	0	0.453009	0	0	0	2.39428	0	0	0	0	0	0	0	0.347392	0	0	0	0	0	2.21638	0.207542	0	0	1.21263	2.63764	0	0	1.03353	0	0	0
F1S4_161129_109_H01	70	#6B998D	OPC L1-6 PDGFRA	3	#F52D19	Non-Neuronal	0	0	0.185805	0.185805	2.59133	0	0	0	0	0	1.94726	2.2116	0	0	0	0	2.70924	0.185805	0	0	0.315521	0	2.12171	0	3.01414	0	0.185805	0	0	0.415272	0	0	0	0
F2S4_161123_056_H01	71	#665C47	Astro L1-6 FGFR3 SLC14A1	3	#F52D19	Non-Neuronal	0	0	0.308504	0	0.181088	0	0	0	0.181088	0	0	1.11056	0	0	0	0	0	0	0	2.17157	2.2935	0	2.43965	0	0.181088	0	2.79331	2.12865	0	1.90951	0	0	0	0
F2S4_161123_057_H01	70	#6B998D	OPC L1-6 PDGFRA	3	#F52D19	Non-Neuronal	0	0	0.249306	0	0	0	2.56468	0	0	0	0	0	0	0	2.12832	0	0	0	0	1.30933	0	0	2.36127	0	0	0	0	2.6116	0	0	0	0	0	1.96978
F2S4_161123_117_A01	73	#476662	Oligo L1-6 OPALIN	3	#F52D19	Non-Neuronal	0	0	2.22252	2.1968	0.226764	0	0	0	0	0	0	2.46597	0	0	0	0	0	0	0	0	2.42989	0	0	0	0	0	0	2.55498	0	1.9679	0	0	0	0
F1S4_161219_001_H01	70	#6B998D	OPC L1-6 PDGFRA	3	#F52D19	Non-Neuronal	0	0	0	0	0.378852	0	0	0	0	0	0.22949	0.22949	0	0	0	2.46231	0	0	0	0	1.59432	0	1.98401	0	0	0	0	1.50017	0	0	0.817565	0	2.04807	0
F1S4_161219_026_H01	75	#598069	Micro L1-3 TYROBP	3	#F52D19	Non-Neuronal	0	0	0.220229	0	0	0	0	0	0	0	2.13269	0	0	0	0	0	0	0	0	0	0.474419	0	1.2594	0	0	0	0	0	0	0	0	0	1.73638	0
F2S4_161123_058_H01	70	#6B998D	OPC L1-6 PDGFRA	3	#F52D19	Non-Neuronal	0	0	0	0	0	0	0	0	0	0	0.191781	0.191781	0	0	0	0	0	0	0	0.324356	0	0	0	0	0	0	0	0	0	0	0	0	1.93139	0
F2S4_161123_060_H01	73	#476662	Oligo L1-6 OPALIN	3	#F52D19	Non-Neuronal	0	0	0	0	0	0	0	0	0	0	2.3535	0	0	1.81363	0	0	0	0	0	0	0	0	0.346568	1.4727	0	0	0	1.76635	0	0	0	0	0	0
F1S4_161207_044_H01	70	#6B998D	OPC L1-6 PDGFRA	3	#F52D19	Non-Neuronal	0	0	0	0	0	0	2.01609	0	0	0	0.781533	0	0	0	0	0	0	0	0	0	0	0	1.46903	0.282762	0	0	0	0	0	0	0.163999	0	0	0
F1S4_161219_049_H01	70	#6B998D	OPC L1-6 PDGFRA	3	#F52D19	Non-Neuronal	0	0	0	0	1.90053	0	0	0	0	0	0.205225	0	0	0	0	0	0	0	2.39138	0.205225	2.18533	0	0.847619	2.42814	0.604266	0	0	2.59577	0.205225	0.344029	2.43106	0	0	0
F2S4_161123_122_H01	73	#476662	Oligo L1-6 OPALIN	3	#F52D19	Non-Neuronal	0	0	0.242372	0	0	0	0	0	0	0	2.8384	2.13199	0	0	0	0	2.87365	0	0	1.79953	0	0	0.242372	0.510807	0	0	0	1.22255	0	0	0	0	0	0
F2S4_161123_125_G01	73	#476662	Oligo L1-6 OPALIN	3	#F52D19	Non-Neuronal	0	0	0	0.194644	0.194644	0	0	0	0	0	0	0	0	2.63309	0	0	0	0	0	3.19532	2.95456	0	0	2.12673	0	0	0	2.41589	0	1.62612	2.29119	0	2.42429	0
F2S4_161123_069_H01	73	#476662	Oligo L1-6 OPALIN	3	#F52D19	Non-Neuronal	0	0	0	2.46509	0.510906	0	0.242433	0	0	0	0	0.242433	0	0	0	0	0	0	0	2.71771	0	0	0	1.22269	0	1.31041	0	2.88621	0	0	0	0	0	1.34107
F2S4_161123_096_H01	73	#476662	Oligo L1-6 OPALIN	3	#F52D19	Non-Neuronal	0	0	0.331664	0	0.331664	0	0	0	0.331664	0	2.29948	0	0	0	0	0	0	0	0	0	2.83294	0	0	3.0168	0	0	0	2.75462	0	1.09558	0	0	0	0
F2S4_161123_097_A01	71	#665C47	Astro L1-6 FGFR3 SLC14A1	3	#F52D19	Non-Neuronal	0	0	0	0	0.219771	0	0	0	0.632817	0	0.365005	0	0	0	2.36216	0	0	0	0	0	0	0	2.94887	0.219771	0	0	2.0728	0	3.04594	2.17762	0.797246	0	0	0
F2S4_161123_127_H01	73	#476662	Oligo L1-6 OPALIN	3	#F52D19	Non-Neuronal	0	0	0	0	0.467743	0	0	0	0	0	0	0	0	0	1.68511	0	1.74198	0	2.15621	0	1.46346	0	0.294015	0.890739	0	0	0	2.98413	0	0	0	0	0	2.24121
F2S4_161123_072_H01	71	#665C47	Astro L1-6 FGFR3 SLC14A1	3	#F52D19	Non-Neuronal	0	0	0.209965	0	0.45713	0	0.728496	0	0	0	0	0.209965	0	0	0	0	0	0	0	2.93988	2.20955	0	1.51462	0	1.88209	0	2.90234	2.13522	0	0	0	0.209965	0	2.49566
F2S4_161123_098_E01	73	#476662	Oligo L1-6 OPALIN	3	#F52D19	Non-Neuronal	1.13149	0	0	2.49614	0.170892	0	0	0	0	0	0	0	0	0	2.7685	0	0	0	0	2.77205	2.35719	1.88204	0	0	0	0	0	0	0	0.293207	0	0	0	0
F2S4_161123_098_H01	70	#6B998D	OPC L1-6 PDGFRA	3	#F52D19	Non-Neuronal	0	0	0	0	0	0	0	0	1.85522	0	0.600452	0	0	0.175377	0	0.651545	0	0	0	0	2.08601	0	2.08066	0	1.78322	0	0	0	0	0	0	0	0	0
F1S4_161102_011_H01	70	#6B998D	OPC L1-6 PDGFRA	3	#F52D19	Non-Neuronal	0	0	0	0	0.160724	0	0.160724	0	0	0	2.26628	0	0	0	0	2.1905	0	0	0	0	0	0	2.0133	0	0	0	0	0.160724	0	0	0.160724	0	0	0
F1S4_161102_013_H01	70	#6B998D	OPC L1-6 PDGFRA	3	#F52D19	Non-Neuronal	0	0	0.188475	0	0.188475	0	0	0	0	0	0	0	0	0	0	0	0	0	0	0	0.188475	0	1.09381	0	0	0	0	0	0	0.319475	0.188475	0	0	0
F1S4_161129_112_H01	70	#6B998D	OPC L1-6 PDGFRA	3	#F52D19	Non-Neuronal	0	0	0.205291	1.36847	0	0	1.05206	0	0	0	0.84777	0	0	0	0	0	0	0	0	0	0.205291	0	0.84777	0	0	0	0	0	0	0	0	0	0	0
F1S4_161102_018_H01	71	#665C47	Astro L1-6 FGFR3 SLC14A1	3	#F52D19	Non-Neuronal	0	0	0	0	2.72612	0	0	0.22314	1.11692	0	0	0	0	0	0	2.02713	0	0	0.22314	0.22314	0	0	2.39941	0	0	0	2.06137	0	0	0.22314	0	0	0	0
F1S4_161129_114_H01	71	#665C47	Astro L1-6 FGFR3 SLC14A1	3	#F52D19	Non-Neuronal	0	0	0	0.812405	0.979718	0	0	0	2.36029	0	0	0	0	0	0.206898	0	0	0	2.39259	0.206898	1.86701	0	2.8212	0.206898	0	0	2.41456	2.11111	0.346457	1.22704	0.206898	0	0	0
F1S4_161129_052_H01	70	#6B998D	OPC L1-6 PDGFRA	3	#F52D19	Non-Neuronal	0	0	0.201541	0	0	0	0.201541	0.201541	0	0	2.29198	0.201541	0	0	1.36996	0	0	0	0	0	0	0	1.84567	0	0	0	0	0	0	1.84199	0	0	0	0
F1S4_161129_085_H01	73	#476662	Oligo L1-6 OPALIN	3	#F52D19	Non-Neuronal	0	0	0	0	0	0	0	0	0	0	0.20889	0	0	2.29403	0	0.349344	0	0	0	0	0.20889	0	0	0	0	0	0	0.20889	0	0.349344	0	0	0	0
F1S4_161129_087_H01	70	#6B998D	OPC L1-6 PDGFRA	3	#F52D19	Non-Neuronal	0	0	0.246735	0	0.608508	0	0	0	0	0	0.246735	0	0	0	0	0.246735	0	0	0	0	0	0	2.01496	0.246735	2.4522	0	0	0	0	0	0	0	0	0
F1S4_161102_109_H01	73	#476662	Oligo L1-6 OPALIN	3	#F52D19	Non-Neuronal	0	0	0	0	0	0	0	0	0	0	0	0	0	0	0	0	0	0	0	0	2.10057	0	0.227151	2.3691	0	0	0	0	0	0	0	0	0	0
F1S4_161102_110_H01	70	#6B998D	OPC L1-6 PDGFRA	3	#F52D19	Non-Neuronal	0	0	0	0.184255	0	0	0	0	0	0	2.47344	2.87496	2.34924	0	0	0	0	0	0	0	0	0	2.70569	0	0	0	0	0.184255	0	0	0	0	0	0
F1S4_161129_016_H01	70	#6B998D	OPC L1-6 PDGFRA	3	#F52D19	Non-Neuronal	0	0	0.224589	0	0	2.17409	0	0.224589	0	0	0	2.65711	0	0	0	0	0	0	2.57617	2.22426	2.18575	0	1.61231	0	0	0	0	2.72197	0	0	0	0	0	0
F1S4_161129_017_H01	71	#665C47	Astro L1-6 FGFR3 SLC14A1	3	#F52D19	Non-Neuronal	0	0	0.681568	0	0.355619	0	0	0	0	0	0	2.41438	0	1.70826	0	0	0	1.90096	0	1.84177	0.355619	0	1.2099	0	0	0	2.37443	0.355619	2.5349	0	0	0	0.462669	0
F1S4_161129_018_H01	71	#665C47	Astro L1-6 FGFR3 SLC14A1	3	#F52D19	Non-Neuronal	0	0	0	0	0	0	0	0	0	0	0	0	0	0	0	0	0	0	0	2.74612	0.224699	0	1.32897	0.372042	0	0	1.25385	0	0	0	0	0	0	0
F1S4_161129_089_H01	73	#476662	Oligo L1-6 OPALIN	3	#F52D19	Non-Neuronal	0	0	0	0	0.208978	0	0	0	0	0	0	0	0	2.76532	0	0.208978	0	0	0.208978	0.455453	1.56637	0	0.349471	2.66698	0	0	0	2.59759	0	0.208978	0	0	0	0
F1S4_161102_114_H01	70	#6B998D	OPC L1-6 PDGFRA	3	#F52D19	Non-Neuronal	0	0	0.206587	0	0	0	0	0	0.346007	0	0	0	0	0	0	0	0	0	0	0	2.36293	0	0.536112	0	0	0	0.206587	0	0.206587	0	0	0	0	0
F1S4_161129_021_H01	70	#6B998D	OPC L1-6 PDGFRA	3	#F52D19	Non-Neuronal	0	0	0.465326	0	0.21481	0	0	0	0	0	0.21481	0	0	0	0	0	0	0	0	0	0	0	2.888	0	0.21481	0	0	0	0	0.21481	0	0	0	0.21481
F1S4_161129_118_H01	73	#476662	Oligo L1-6 OPALIN	3	#F52D19	Non-Neuronal	0	0	0.198533	2.67196	0	0	0.198533	0	0	0	2.39729	0	0	0	0	0	2.78951	0	0	0	2.65503	0	0.751002	2.33796	0	0	0	2.79398	0	0.198533	0	2.71527	0	0
F1S4_161129_119_H01	75	#598069	Micro L1-3 TYROBP	3	#F52D19	Non-Neuronal	0	0	0.366204	0	0.475052	0	0.220608	0	0	0	0	0.842436	0	0	0	0	0	0	0	0	0	0	2.78483	0	0	0	0	0	1.41752	0	0	0	0	0
F1S4_161219_004_H01	70	#6B998D	OPC L1-6 PDGFRA	3	#F52D19	Non-Neuronal	0	0	0.659261	0	0	0	0	0	0	0	0	1.02126	0	0.202448	0	0	0	0	0	0.202448	0	0	2.68038	0.444288	0	0	0	1.26059	0	0	0	0	0	0
F1S4_170106_105_H01	75	#598069	Micro L1-3 TYROBP	3	#F52D19	Non-Neuronal	0.995855	0	0	2.78779	0	0	0	0	0	0	0	0.298732	0	0.298732	0	0.298732	0	0	0	0	0.298732	0	0	0.298732	0	0	0	0	0	0	0	0	0	0
F1S4_170106_106_H01	70	#6B998D	OPC L1-6 PDGFRA	3	#F52D19	Non-Neuronal	0	0	0.200428	2.13129	0.337042	0	0	0	0	0	0.200428	0	0	0	0	0	0	0	0	0	0	0	2.11008	0	0	0	0	0	0	0	0.200428	0.200428	0	0
F1S4_170106_033_H01	73	#476662	Oligo L1-6 OPALIN	3	#F52D19	Non-Neuronal	0	0	0.191804	0.636648	0.191804	0	0	0	0	0	0	1.44174	0	0	0	0	2.46201	0	0	0	1.90226	0	0	0.57707	0	0	0	0	0	2.55594	0.191804	0	0	2.24391
F1S4_170106_142_H01	70	#6B998D	OPC L1-6 PDGFRA	3	#F52D19	Non-Neuronal	0	0	0	0	2.36488	0	0	0	0	0	1.95711	0.22236	0	0.22236	1.5535	0	0	0	0	2.18216	0	0	1.37536	0	0	0	0	2.34172	2.24924	0	0.22236	0	0	1.09225
F1S4_161129_024_H01	70	#6B998D	OPC L1-6 PDGFRA	3	#F52D19	Non-Neuronal	0	0	0	0.205074	0.205074	0	0	0	0	0	1.26722	2.69906	0	0	0	0	1.46783	0	0	2.35664	0	0	1.29467	0	0	0	0	0	0	0	0	0	0	0
F1S4_161129_026_H01	73	#476662	Oligo L1-6 OPALIN	3	#F52D19	Non-Neuronal	0	0	0.358756	0.215415	0	0.358756	0	0	0	0	0	0.215415	0	0	0	0	0	0	0	0	1.90301	0	0	0	0	0	0	1.51143	0	0	0.215415	0	0	0
F1S4_161129_123_H01	73	#476662	Oligo L1-6 OPALIN	3	#F52D19	Non-Neuronal	0	0	0.264703	0	0.264703	0.427977	0.264703	0	1.13331	0	0.427977	0	0	2.52303	0	0.546362	0	0	0	2.82341	0	0	0	0.264703	0.264703	0	0	0	0	0.427977	0.427977	0.427977	0.264703	0
F1S4_170106_069_H01	71	#665C47	Astro L1-6 FGFR3 SLC14A1	3	#F52D19	Non-Neuronal	0	0	0.348846	0	0.348846	0	0	0	0	0	0	0	0	0	0	0	0	0	0	0	2.23017	0	1.08261	0.208546	0	0	0	2.09006	0	0	0	0	0.671944	0
F1S4_170106_070_H01	71	#665C47	Astro L1-6 FGFR3 SLC14A1	3	#F52D19	Non-Neuronal	0	0	0.248574	0	2.43968	0.40567	0.248574	0	0	0	0	0.40567	0	0	0.94074	0	0	0	0	0	2.01268	0	2.82049	0	0	0	2.43106	0	0	0	0	0	0	0
F1S4_161129_029_H01	75	#598069	Micro L1-3 TYROBP	3	#F52D19	Non-Neuronal	0.749603	0	0.220044	0	2.69184	0	0	0	0	0	0	0	1.74115	0	0	0	0	0	0	2.78811	0	0	0	0	2.7656	0	0	2.50648	0.474109	0	0	0	0	2.87572
F1S4_161129_062_H01	70	#6B998D	OPC L1-6 PDGFRA	3	#F52D19	Non-Neuronal	0	0	0.230385	0	0.230385	0	0	0	0	0	0	0	0	0	0.230385	0	0	0	0	0	2.19795	0	0.230385	0.380121	0	0	0.230385	0.230385	0	1.62619	0	0	0	0
F1S4_161129_063_H01	71	#665C47	Astro L1-6 FGFR3 SLC14A1	3	#F52D19	Non-Neuronal	0	0	0.218591	0	0.218591	1.98753	0.363315	0	0	0	2.55807	0	0	0	0	2.38337	0	0	0	0	0	0	2.62293	0	1.37835	0	2.68935	0	0	0.218591	0	0	0	0
F1S4_170106_003_H01	70	#6B998D	OPC L1-6 PDGFRA	3	#F52D19	Non-Neuronal	0	0	0.33554	0	0.1994	0	0	0	0	0	0	0	0.1994	0	0	0	0	0	0	2.78236	2.48537	0	2.83055	0	0	0	0	0.1994	2.54484	0.439035	0.1994	1.71832	0	0
F1S4_170106_004_H01	71	#665C47	Astro L1-6 FGFR3 SLC14A1	3	#F52D19	Non-Neuronal	0	0	0	0	0.331191	0.19643	0	0.19643	0.331191	0	0.331191	0.19643	0	0	0	0.19643	0	0	0	0.19643	1.76057	0	2.76497	0	1.87708	0	2.1407	0.19643	0	0	0	0	0	0
F1S4_170106_007_H01	73	#476662	Oligo L1-6 OPALIN	3	#F52D19	Non-Neuronal	0	0	0	2.1617	2.62499	0	1.53757	0	0	0	0	0	0	0	0	0	2.42832	0	1.55553	0	3.00983	0	2.03921	2.23563	0	0	0	0	0	0	0	0	0	0.666441
F1S4_170106_038_H01	73	#476662	Oligo L1-6 OPALIN	3	#F52D19	Non-Neuronal	0	0	0	0	0.650794	0.334119	0	0.334119	0	0	1.94955	0	0	1.61849	0	0	0.520703	0	0	2.69412	2.66466	0	0.334119	2.53639	0	0	0	2.76528	0	0	0	2.5578	0.520703	2.48686
F1S4_170106_107_H01	71	#665C47	Astro L1-6 FGFR3 SLC14A1	3	#F52D19	Non-Neuronal	0	0	0	0	2.77616	0	0	0	2.95547	0	0.234683	0	2.23443	0	0	0	0	0	0	0.234683	2.01486	0	2.24694	0.234683	0.872149	0	2.4841	0	0	0	0	0	0	0
F1S4_170106_074_H01	71	#665C47	Astro L1-6 FGFR3 SLC14A1	3	#F52D19	Non-Neuronal	0	0	0.290623	1.29174	0.169181	0	0	0	0	0	2.00444	0	0	0	0	1.02228	0	0	0	2.2171	0.856861	0	1.82123	0	0	0	0	0	0	0	0.529123	0.169181	2.03602	0
F1S4_170106_075_H01	70	#6B998D	OPC L1-6 PDGFRA	3	#F52D19	Non-Neuronal	0.210021	0	0.210021	0	0	0	0	0	0	0	0	0	0	0	0	0	0	0	1.2502	0	0	0	0.776345	0	0	0	0	2.61953	0	1.70544	0	0	0	0
F1S4_161129_033_H01	70	#6B998D	OPC L1-6 PDGFRA	3	#F52D19	Non-Neuronal	0	0	0	0	0.371596	0	0	0	0	0	0	0	0	0	0	0	0	0	0	0	0	0	1.7518	0	0	0	0	0	1.65939	0	1.63285	0	2.1472	2.59251
F1S4_161129_066_H01	71	#665C47	Astro L1-6 FGFR3 SLC14A1	3	#F52D19	Non-Neuronal	0	0	0	0	0	0.193344	0	0	0	0	0	1.69713	0	0	0	0	0	0	0	2.31321	1.58628	0	2.06431	0.193344	1.65612	0	2.32489	0	0	0	0	0.193344	0	0
F1S4_170106_011_H01	71	#665C47	Astro L1-6 FGFR3 SLC14A1	3	#F52D19	Non-Neuronal	0	0	0.259802	0	2.77845	0	0	0	3.11413	0	0.259802	0	0	0.53865	0	0	0	0	0	0	0.922717	0	0	0.421232	0	0	1.9932	0	0	2.63685	0	0	0	2.55491
F1S4_170106_113_H01	71	#665C47	Astro L1-6 FGFR3 SLC14A1	3	#F52D19	Non-Neuronal	0	0	0	0	0	0.230387	0	0	0.579672	0	0.230387	0	0	0	0	0	0	0	0	0	1.00419	0	0.230387	0.230387	0	0	2.72942	0	0	0.230387	0	0	0	1.49261
F1S4_170106_114_H01	70	#6B998D	OPC L1-6 PDGFRA	3	#F52D19	Non-Neuronal	0	0	0	0	0	0	0	0	0.261977	0	2.26674	0.882185	0	0	0	0	0	0	0	0	0	0	2.71614	0.42423	2.87044	0	0	0	0.261977	2.54253	1.28367	0	0	0
F1S4_161129_037_H01	72	#6B8059	Astro L1-2 FGFR3 GFAP	3	#F52D19	Non-Neuronal	0	0	0	0	2.47209	0	0	0	2.47301	0	0	2.47665	0	0	1.99698	0	0	0	2.07222	0	0	0	1.71365	0	0	0	2.72692	0	2.63779	0	0	0	0	0
F1S4_170106_014_H01	73	#476662	Oligo L1-6 OPALIN	3	#F52D19	Non-Neuronal	1.68482	0	0	2.11841	0	0	0	0	0	0	0	2.31518	0	0	0	0	2.50736	0	1.48108	2.31955	2.93857	0	0	2.00292	0	0	0	0	0	0.229687	0	0	1.41652	0
F1S4_170106_115_H01	71	#665C47	Astro L1-6 FGFR3 SLC14A1	3	#F52D19	Non-Neuronal	0	0	0	1.16567	0	0	0	0	1.81507	0	0	0.217412	0	2.14424	0	0	0	0	0	0	2.29207	0	0	0.361625	0	0	1.58018	0	1.59477	1.87168	0	0	0	2.23522
F1S4_170106_116_H01	71	#665C47	Astro L1-6 FGFR3 SLC14A1	3	#F52D19	Non-Neuronal	0	0	0.181752	0	0.181752	0	0	0	0	0	0.181752	0	0	0	0	0	0	0	0	0.408076	1.84582	0	2.01223	0	2.27794	0	0.488369	0	0	0.309493	2.20839	0	0	0
F1S4_170106_042_H01	70	#6B998D	OPC L1-6 PDGFRA	3	#F52D19	Non-Neuronal	0	0	0.189406	0	0.320852	0	0	0	2.76909	0	0	3.04649	2.47241	0	0	0	0	0	1.96002	0	0	0	2.58522	0.42162	2.74457	0	0	0	0	1.34872	0	0	0	0
F1S4_161129_040_H01	71	#665C47	Astro L1-6 FGFR3 SLC14A1	3	#F52D19	Non-Neuronal	0	0	0.21935	0	2.04171	0	0	0	0	0	0	0	0	0	1.59231	1.70142	0	0	0	0	0	0	2.62485	0.364403	0	0	2.43413	2.48744	0	0	0	0	0	0
F1S4_170106_015_H01	73	#476662	Oligo L1-6 OPALIN	3	#F52D19	Non-Neuronal	0	0	0	1.2869	0.37291	0.225308	0	0	0	0	0	1.09899	0	0	0	0	2.5362	0	2.64573	0.482871	0	0	0	2.29261	0	0	0	0	0	0	0	0	0	0
F1S4_170106_016_H01	71	#665C47	Astro L1-6 FGFR3 SLC14A1	3	#F52D19	Non-Neuronal	0	0	0.224339	0.224339	0	0	0	0	2.67364	0	0	0	0	1.93213	0	1.04703	0	0	0	0	1.89261	0	0.37153	0.224339	0	0	2.50265	1.93555	1.9869	1.74645	0	0	0	0
F1S4_170106_044_H01	73	#476662	Oligo L1-6 OPALIN	3	#F52D19	Non-Neuronal	0	0	0	0	0.220118	0	0	0	0	0	0	1.94184	0	0	0	0	0	0	2.20788	2.76529	2.17082	0	0	0.749758	0	0	0	0	0	2.71528	0	0	0	0
F1S4_170106_045_H01	73	#476662	Oligo L1-6 OPALIN	3	#F52D19	Non-Neuronal	0	0	0	2.76743	0.300054	0	0	0	0	0	3.15611	0	0	0	0	0	1.29917	0	0	0	0	0	0.300054	0	0	0	0	0	0	0	0	0	0	0
F1S4_161129_103_H01	73	#476662	Oligo L1-6 OPALIN	3	#F52D19	Non-Neuronal	0	0	0	0	1.38837	0.917983	0	0	0	0	1.41618	0.917983	0	0	0	2.73793	0	0	0	0	2.03246	2.31648	0	0.257388	0	0	0	2.99035	0	0.257388	0	0	0	0
F1S4_170106_079_H01	71	#665C47	Astro L1-6 FGFR3 SLC14A1	3	#F52D19	Non-Neuronal	0	0	0	0	0	0	0	0	0	0	0	0	2.56546	0	0	1.94527	0	0	0	0.447668	2.16928	0	0.447668	0	0	0	3.09964	0	0	0	0	0	0	0
F1S4_170106_117_H01	71	#665C47	Astro L1-6 FGFR3 SLC14A1	3	#F52D19	Non-Neuronal	0	0	0	0	0.509907	0	0	0.241816	2.35841	0	2.52959	0.241816	0	0	0	0	0	0	1.6739	0	0	0	2.85868	0	0	0	0	0	0	0.241816	0.738026	0	0	0.509907
F1S4_170106_118_H01	71	#665C47	Astro L1-6 FGFR3 SLC14A1	3	#F52D19	Non-Neuronal	0	0	0	1.25516	0.194934	0	0	0	2.73673	0	1.00278	0.194934	0	1.87301	0	0	0	0	2.23575	0	0	0	1.48371	0	0.643362	0	2.76679	0	0	1.53686	0	0	0	0
F1S4_161129_072_H01	70	#6B998D	OPC L1-6 PDGFRA	3	#F52D19	Non-Neuronal	0	0	0	0	0	2.12504	0.194029	0	0	0	0	1.74535	0	0	0	0	0	0	0	0	0	0	1.95962	0	0	0	0	2.85375	0	0	0	0	0	0
F1S4_161207_053_H01	74	#99796B	Endo L2-6 NOSTRIN	3	#F52D19	Non-Neuronal	0	0	0.964889	0	1.79899	0	0	0	0	0	0	2.10785	0	0	0	0.189834	0	0	0	0	0	0	0	0	2.36512	0	0.189834	2.78107	2.69935	1.9865	0.189834	0	0.189834	0
F1S4_170106_120_H01	71	#665C47	Astro L1-6 FGFR3 SLC14A1	3	#F52D19	Non-Neuronal	0	0	0	0	0.411185	0	0	0.183499	2.39283	0	0	0	0	0	0	0	0	0	0	0	2.35621	0	2.58051	0	0	0	0	2.62603	0	1.22464	0	0.183499	0	0
F1S4_170106_049_H01	73	#476662	Oligo L1-6 OPALIN	3	#F52D19	Non-Neuronal	0	0	0	0	0.419889	0	0	0	0	0	2.6867	0	0	0	2.32361	0	0	0	0	0.188422	2.38022	0	0	2.4648	0	0	2.77072	0	0	2.47677	0	0	0	2.56928
F1S4_170106_121_H01	73	#476662	Oligo L1-6 OPALIN	3	#F52D19	Non-Neuronal	0	0	0	0.173163	0	0.173163	0	0.173163	0	0	3.06009	2.79735	2.4422	0	0	0	0	0	0	2.4321	0	0	0	0.392654	0	0	0	2.49904	0	2.81104	0	0	0	0
F1S4_170106_122_H01	71	#665C47	Astro L1-6 FGFR3 SLC14A1	3	#F52D19	Non-Neuronal	0	0	0.43484	0	0	0.331994	0.196977	0	0	0	0	0.828595	0	2.28094	0	0	0	0	1.20198	0	0	0	2.15633	0	0	0	0	0	1.49716	0	0.196977	0	0	0
F1S4_170106_018_E01	70	#6B998D	OPC L1-6 PDGFRA	3	#F52D19	Non-Neuronal	0	0	0	0	0	0	0	0	0	0	2.74609	0	2.38818	0	0	0	1.44429	0	0	1.82085	0	0	1.99706	0	0	0	0	0	2.87247	0	0	0	0	0
F1S4_170106_019_H01	70	#6B998D	OPC L1-6 PDGFRA	3	#F52D19	Non-Neuronal	0	0	0	2.19543	0.214487	0.214487	0	0	0	0	0	0	0	0	0	1.95004	0	0	0	0	0	0	0	0.214487	0	0	0	0	0.785986	0	0	0	0	0
F1S4_170106_083_H01	73	#476662	Oligo L1-6 OPALIN	3	#F52D19	Non-Neuronal	0	0	0	0	0.669508	0	0	0	0	0	0	0	0	0	0	0	0	0	2.67737	2.4307	1.87181	1.47497	0	0.18315	0	0	0	3.02772	0	2.54257	1.11612	0	0	0
F1S4_170106_020_H01	70	#6B998D	OPC L1-6 PDGFRA	3	#F52D19	Non-Neuronal	0	0	0	2.22077	0	0	0	0	0	0	0	0	0	0	0	0	0	0	0	2.72969	0	0	2.94439	0	0	0	0	0	0	0	0	2.63118	0	0
F1S4_170106_084_H01	71	#665C47	Astro L1-6 FGFR3 SLC14A1	3	#F52D19	Non-Neuronal	0	0	0.181519	0.181519	2.29246	0	0	0	0.309147	0	0.889035	0	0	0	2.08967	1.76009	0	0	0	0	0	0.711885	2.44335	0	0	0	2.57952	0	0	0	2.1877	0	0	0
F1S4_161207_060_H01	70	#6B998D	OPC L1-6 PDGFRA	3	#F52D19	Non-Neuronal	2.15012	0	0.299172	0	0	0.174853	0	0	0	0	0	2.12824	0	0	0	0.174853	0	0	1.85063	0	0	0	1.90481	0	0	0	0	1.66845	0	0.174853	0.174853	0	0	1.9408
F1S4_161207_063_H01	75	#598069	Micro L1-3 TYROBP	3	#F52D19	Non-Neuronal	0	0	0	0	0.213419	0	0	0	0	0	0	0	0	0	0	0	0	0	0	0.355884	0.213419	0	1.97738	0.213419	0	0	0	2.758	0	0	0	3.02927	2.13207	0
F1S4_161207_119_H01	75	#598069	Micro L1-3 TYROBP	3	#F52D19	Non-Neuronal	0	0	0.375518	0	0.485907	0	0	0	0.227141	0	0.375518	0	0	0	0	2.27865	0	0	0	0	0.227141	0	0.8127	0.709491	0	0	0	2.95477	0	0	0	0	0	0
F1S4_161207_120_H01	70	#6B998D	OPC L1-6 PDGFRA	3	#F52D19	Non-Neuronal	0	0	0	2.2515	0.228691	0	1.92875	0	2.67742	0	0	0	2.46452	0	0	2.41652	0	0	0	2.68619	0.228691	0	1.08243	0.377719	0	0	0	0	0	0	0	0	2.45407	0
F1S4_170106_023_H01	71	#665C47	Astro L1-6 FGFR3 SLC14A1	3	#F52D19	Non-Neuronal	0	0	0	0	1.55709	0.246079	0	0	2.86769	0	0.402191	0.972446	0.246079	0	0	0	0	0	0	0	1.65527	0	2.42534	0.246079	0.682279	0	0	0.246079	2.12841	1.50859	0	0	0	0
F1S4_170106_053_H01	73	#476662	Oligo L1-6 OPALIN	3	#F52D19	Non-Neuronal	1.74557	0	0.380507	0	0	0	0	0	0.230658	0	0	0	0	0	0	1.76691	0	0	0	1.3825	2.41897	0	0	0	0	0	0	0	0.491705	0	0	0	0	0
F1S4_170106_086_H01	71	#665C47	Astro L1-6 FGFR3 SLC14A1	3	#F52D19	Non-Neuronal	0	0	0.376272	0	0.227672	0	0	0	0.967079	0	0	0	0	0	0	0	0	0	1.59762	0	0	0	2.32041	0.227672	2.91947	0	2.0327	0	0	0	0.227672	0	0	0
F1S4_170106_087_H01	71	#665C47	Astro L1-6 FGFR3 SLC14A1	3	#F52D19	Non-Neuronal	0	0	0	0	0.377391	0.22846	0	0	2.73592	0	0.22846	0	0	0	0	0	0	0	0	0	0	0	2.10138	0	0	0	0	2.34465	0	2.1108	1.48807	0	0	0
F1S4_161207_068_H01	75	#598069	Micro L1-3 TYROBP	3	#F52D19	Non-Neuronal	0	0	0.278947	0	0	0	0	0	0	0	0	0	0	0	2.55465	2.96287	0.447421	0	0	0.278947	0	0	2.29531	0	0	0	3.03532	1.41869	2.15635	1.98041	0	0	0.278947	0
F1S4_170106_123_H01	73	#476662	Oligo L1-6 OPALIN	3	#F52D19	Non-Neuronal	0	0	0.231589	0.905509	0.231589	0	0	0	0	0	3.19761	0	0	0	0	0	1.55046	0	2.80086	0	0	0	0.231589	0	0	0	0.231589	1.28592	0	1.83203	0.231589	0	0	0
F1S4_170106_124_H01	70	#6B998D	OPC L1-6 PDGFRA	3	#F52D19	Non-Neuronal	0	0	0.227358	0	0	0	0	0	0	0	0	0	0	0	0.227358	0	0	0	0	0	0	0	2.71114	0	0	0	0	0	0	0	0	0	0.375825	0
F1S4_170106_026_H01	73	#476662	Oligo L1-6 OPALIN	3	#F52D19	Non-Neuronal	0	0	0	0	0	0	0	0	0	0	0	0	0	0	0	0	2.54036	0	1.88726	2.76832	2.86783	0	0	2.98331	0	0	0	0	0	0	0	0	0	0
F1S4_170106_054_H01	71	#665C47	Astro L1-6 FGFR3 SLC14A1	3	#F52D19	Non-Neuronal	0	0	0	1.39751	1.94043	1.70667	0	0	2.15309	0	0	2.31337	0	0	0.216953	2.34628	0	0	0.216953	0	1.16458	0	2.36611	0.216953	2.28947	0	0	2.27627	0	0	0	0	0	0.360966
F1S4_170106_055_H01	73	#476662	Oligo L1-6 OPALIN	3	#F52D19	Non-Neuronal	0	0	0.342853	0	0	0	1.65205	0	0	0	0	0	2.54436	0	0	0	2.73543	0	0	0	2.30999	0	0	3.03606	0	0	0	1.82685	0	0	0	0	0	0
F1S4_170106_091_H01	73	#476662	Oligo L1-6 OPALIN	3	#F52D19	Non-Neuronal	0	0	0.482575	0.305127	0	0	0	0	0	0	0	0	1.04881	0	0	0	0	0	0	0	2.24615	0	0	0.305127	0	0	0	0	0	0	0	0	0	0
F1S4_170106_126_H01	72	#6B8059	Astro L1-2 FGFR3 GFAP	3	#F52D19	Non-Neuronal	0	0	0	0	0	0	0	0	0	0	0.186525	0	0	1.64264	0	2.15093	0	0	0	1.9622	0.316588	0	2.53017	0	0	0	0.871437	0.186525	0	0.416543	0	2.44376	0	0
F1S4_170111_145_H01	73	#476662	Oligo L1-6 OPALIN	3	#F52D19	Non-Neuronal	0	0	0	0.749609	1.31446	0	0	0	0	0	2.48133	0	0	2.52835	0	0	2.9345	0	0	0	2.52612	0	0	3.00857	0	0	0	0	0	0	0	0	0	0
F1S4_161207_129_H01	73	#476662	Oligo L1-6 OPALIN	3	#F52D19	Non-Neuronal	0	0	0.726452	0	0.436266	0	0	0	0	0	0	0	0	0	0	2.10496	0	0	0.270755	0	2.89005	0	0	2.59247	0	0	0	0	0	0	0	0	0	0.270755
F1S4_170106_127_H01	71	#665C47	Astro L1-6 FGFR3 SLC14A1	3	#F52D19	Non-Neuronal	1.94847	0	0.181729	1.951	0.309459	2.31328	0	0	2.51907	0	0	0	2.11521	0	0	1.11229	0.992693	0	0.181729	1.55404	0	0	0	0	2.30776	0	0	2.84242	0	0.181729	0.614643	0	0	0
F1S4_161219_028_H01	70	#6B998D	OPC L1-6 PDGFRA	3	#F52D19	Non-Neuronal	0	0	0.470775	0.172929	0.392232	0	0.172929	0	0	0	0	0	0	0.172929	0	0	0	0	0	0	2.16949	0	1.24625	0.296279	0	0	0	0.645799	0	0	0.392232	0	0	1.70663
F1S4_170106_056_H01	73	#476662	Oligo L1-6 OPALIN	3	#F52D19	Non-Neuronal	0	0	0.547745	0.212837	0.619323	0	0	0	0	0	3.09141	0	0	0	0	0	2.77071	0	0	0	2.93506	0	0	0	0	0	0	2.59101	0	0	0.212837	0	0	2.14655
F1S4_170106_057_H01	73	#476662	Oligo L1-6 OPALIN	3	#F52D19	Non-Neuronal	0	0	0.308322	2.28038	0	0	0	0	0	0	2.63248	0.180966	0	0	0	0.180966	3.0256	0	0.180966	0.180966	2.7599	0	2.42349	1.77388	0	0	0	0.180966	0	0	0	0	0	0
F1S4_170106_095_H01	75	#598069	Micro L1-3 TYROBP	3	#F52D19	Non-Neuronal	0	0	0.53278	0	0.204812	0.807735	0	0	0	0	2.85833	3.04426	0	0	0	0	0	0	0	0	0.204812	0	2.8623	0	0	0	0	0	1.50147	0	0	0	0.204812	0
F1S4_161207_132_H01	71	#665C47	Astro L1-6 FGFR3 SLC14A1	3	#F52D19	Non-Neuronal	0	0	0	0	0.989227	0	0	0	0	0	1.42553	2.56742	0	1.83195	0	0	0	0	0	0	0	0	1.74356	0.210949	2.20707	0	2.75688	1.90198	0	0	0	0	0	0
F1S4_170106_059_H01	73	#476662	Oligo L1-6 OPALIN	3	#F52D19	Non-Neuronal	0	0	0	0.242011	0	0	0	0	0	0	3.11129	0	0.927301	0	2.24986	0	1.78297	0	0	0	2.89109	0	0	2.80531	0	0	0	3.04595	0	0.242011	0	0	1.02923	0
F1S4_161207_134_H01	73	#476662	Oligo L1-6 OPALIN	3	#F52D19	Non-Neuronal	0	0	0	0.270849	2.39701	0	0	0	0	0	0	0	0	0	0	2.13647	0	0	2.75505	0.270849	2.81369	2.30874	0	2.69641	0	0	0	1.5074	0.270849	0	0	0	0	0
F1S4_170106_027_H01	73	#476662	Oligo L1-6 OPALIN	3	#F52D19	Non-Neuronal	0	0	0	2.67305	0	0	1.00765	0	0	0	0	0.795489	0	0	0	0	1.92896	0	0	2.8164	2.46548	0	1.18814	0	0	0	0	0	0	0	0	0	0	0
F1S4_170106_129_H01	75	#598069	Micro L1-3 TYROBP	3	#F52D19	Non-Neuronal	1.93717	0	0	2.3912	0.204753	0	0	0	0	0	1.94318	0	0	0	0	0	0	0	0	0	0	2.85562	2.46348	0	0	0	0	0	0	0	0.717365	0	0	0
F1S4_170106_130_H01	75	#598069	Micro L1-3 TYROBP	3	#F52D19	Non-Neuronal	0	0	0.220828	0	0	0	0	0	0	0	2.658	0	0	0	0	0	0	0	0	0	0	0	0	0.366518	0	0	0	3.00591	0	0	0	0	0.220828	0
F1S4_161207_137_H01	70	#6B998D	OPC L1-6 PDGFRA	3	#F52D19	Non-Neuronal	0	0	0.237792	0	0	0	0	0	0	0	0	0	0	0	0	0	0	0	1.96437	0	0	0	1.6363	0	0	0	0	0	0	0	0.592837	0	0	0
F1S4_161219_055_H01	73	#476662	Oligo L1-6 OPALIN	3	#F52D19	Non-Neuronal	2.56338	0	0	2.21914	0.469007	0	0	0	0	0	0.216998	1.2016	0	0	0	0	0	0	0	2.8188	0	0	0	0.216998	2.10069	0	0	3.06756	0	0.216998	0	0	0	0
F1S4_170106_029_H01	71	#665C47	Astro L1-6 FGFR3 SLC14A1	3	#F52D19	Non-Neuronal	0	0	0	1.75292	0.259558	2.52569	2.34278	0	2.83134	0	0	0	1.14877	0	0	0	0	0	0	0	2.27858	0.420896	1.3476	0.420896	0	1.06566	2.70311	1.73368	0	0	0	0	0	2.73433
F1S4_170106_132_H01	71	#665C47	Astro L1-6 FGFR3 SLC14A1	3	#F52D19	Non-Neuronal	0	0	0	2.27177	0	0.289773	1.86398	0	0	0	2.33902	0	2.39225	0	0	1.45509	0.289773	0.289773	0.289773	0	1.62117	0	2.72774	0.289773	0.289773	0	1.90688	0	0	0	1.12498	0	0	0
F1S4_170118_104_H01	73	#476662	Oligo L1-6 OPALIN	3	#F52D19	Non-Neuronal	0	0	0	0	0	0	0	0	0	0	1.93824	0	0	2.14766	0	0	0	0	0	2.93886	2.71381	0	0.214811	0	0	0	0	0	0	0	0	0	0	0
F1S4_170118_128_H01	70	#6B998D	OPC L1-6 PDGFRA	3	#F52D19	Non-Neuronal	0	0	0	0.213923	0	0	0	0	0	0	2.44387	0	0	0	0	0	0	0	0	0	0	0	1.74119	0	0	0	0	0	0	2.26407	0	0	0	0
F1S4_170106_031_H01	71	#665C47	Astro L1-6 FGFR3 SLC14A1	3	#F52D19	Non-Neuronal	0	0	0	0	0.353805	2.32718	0	0	2.68674	0	1.33774	1.76536	0	0	0	0.617634	0	0	0	0	1.57396	0	1.99907	0	0	0	1.37386	2.09893	0	0.353805	0	0	0.211977	1.26993
F1S4_170125_006_H01	72	#6B8059	Astro L1-2 FGFR3 GFAP	3	#F52D19	Non-Neuronal	0	0	0	0	0.201858	0.201858	0	0	0	0	0	0	0	0	0	0.201858	0	0	2.21251	0	0	0	2.03381	0.201858	0	0	0	1.90783	0	0	0	0	0	0
F1S4_161219_059_H01	70	#6B998D	OPC L1-6 PDGFRA	3	#F52D19	Non-Neuronal	0	0	0.233325	0	0.233325	0.721627	0	0	0	0	0	0	0.233325	0	0	0	0	0	0	0	2.17922	0	0	0	0	0	0	0	0.233325	0	0	0	0	0
F1S4_170106_104_H01	71	#665C47	Astro L1-6 FGFR3 SLC14A1	3	#F52D19	Non-Neuronal	0	0	0	1.34021	0	0	0	0.271923	1.28505	0	0	0	0	0	0	2.1415	0	0	1.87494	0	0	0	2.32735	0.271923	1.8543	0	1.48561	2.44232	2.53204	0	0	0	0	0
F1S4_170106_134_H01	71	#665C47	Astro L1-6 FGFR3 SLC14A1	3	#F52D19	Non-Neuronal	0	0	0	0.881569	1.86774	0	0.322675	0	2.61965	0	1.74476	0	0	0	0	2.6731	0	0	0	0	0.634137	0.190641	1.46399	0	1.53929	0	0	2.25818	0	0.190641	0	0	0	0
F1S4_170106_063_H01	75	#598069	Micro L1-3 TYROBP	3	#F52D19	Non-Neuronal	0	0	0	0	0.231674	2.4549	0	0	0	0	0	0	0	0.231674	0	0	0	0	0	0	0	0	0	0	0	0	0.865887	0	0	0	0	0	0	0.231674
F1S4_170106_099_H01	71	#665C47	Astro L1-6 FGFR3 SLC14A1	3	#F52D19	Non-Neuronal	0	0	0.318631	2.01189	0.187904	0	0	0	1.90913	0	1.76629	2.44007	0	0	0	0	0	0	0	1.74144	2.0254	0	2.37974	0	0.187904	0	2.24383	2.50935	0	2.34185	0	0	0	1.51053
F1S4_170106_102_H01	71	#665C47	Astro L1-6 FGFR3 SLC14A1	3	#F52D19	Non-Neuronal	0	0	0	0.957472	2.25577	0	0	0	1.62234	0	0	0.332934	0	0	0	1.80094	0	0	0	2.63839	2.34801	0	2.40772	0	0	0	0	1.33734	2.0739	0.957472	2.20422	0	0	0
F1S4_170106_135_H01	70	#6B998D	OPC L1-6 PDGFRA	3	#F52D19	Non-Neuronal	0	0	0.203447	0	0	0	0	0	1.93373	0	2.4331	1.85071	1.92764	0	0.94289	0	0	0	0	0	0	0	1.82818	0	0	0	0	2.08529	0	0.203447	2.52195	0	0	0
F1S4_170117_098_H01	71	#665C47	Astro L1-6 FGFR3 SLC14A1	3	#F52D19	Non-Neuronal	0	0	0.193106	1.97289	2.63111	0	0.510509	0	0	0	0	0	0	0	0	0	0	0	0	0	0	0	2.0487	0.193106	2.37013	0	0	0	0	2.10757	0.428102	0	0	0
F1S4_170201_069_H01	71	#665C47	Astro L1-6 FGFR3 SLC14A1	3	#F52D19	Non-Neuronal	0	0	0	0.814811	0.228158	0	0	0	0.228158	0	0	0	0	0	0	0	0	0	0	0	0	0	1.60628	0	1.87071	0	1.29355	2.29807	0	1.79108	0	0	0	2.34119
F1S4_161219_039_H01	73	#476662	Oligo L1-6 OPALIN	3	#F52D19	Non-Neuronal	0	0	0	0	0.462959	0.355866	0	0.462959	0	0	0.355866	0.355866	0	0	0.826803	0	0	0	0.213407	0.213407	0	0	2.72395	0.681919	0.213407	0	3.07284	0.213407	0	1.9715	0.783665	0	0	0
F1S4_161219_040_H01	70	#6B998D	OPC L1-6 PDGFRA	3	#F52D19	Non-Neuronal	0	0	0	0	0	0	0	0	0	0	0	0	0	0	0.208096	0	0	0	0	0	2.11629	0	1.81245	0.538934	0	0	0	2.84658	0	0	0.208096	0.208096	0	0
F1S4_170118_106_H01	73	#476662	Oligo L1-6 OPALIN	3	#F52D19	Non-Neuronal	0	0	0.331643	0	0.331643	0.196737	0.196737	0.196737	0.196737	0	0.196737	0.331643	0	0	0.196737	0	0	0	0	0.331643	2.56554	0	0.434424	2.02943	0.434424	0	0	0.331643	0.196737	0.434424	0.587167	0.196737	0	0.196737
F1S4_170118_108_H01	73	#476662	Oligo L1-6 OPALIN	3	#F52D19	Non-Neuronal	0	0	0.192206	0	0.736686	0.426529	0.192206	0.324983	0.192206	0	2.64093	0.324983	2.79785	0	2.60704	0.192206	2.72188	0	0	0.324983	2.43386	1.06361	1.5223	2.36346	0.192206	0	0.324983	2.84833	1.39687	0.192206	0.778898	0.324983	0	2.12
F1S4_161219_064_H01	70	#6B998D	OPC L1-6 PDGFRA	3	#F52D19	Non-Neuronal	0	0	0.19053	0.19053	0.322512	0	0	0	0	0	0	2.26182	0	0	0	0	0	0	0	1.78159	0	0	0	0	0	0	0	0	0	0.19053	0.19053	0	0	0
F1S4_170106_067_H01	70	#6B998D	OPC L1-6 PDGFRA	3	#F52D19	Non-Neuronal	0	0	0	0	0.682771	0	0	0	0.936206	0	2.58177	0.169415	0	0	1.87755	0	1.23608	0	0	2.78143	0	0	2.45028	0	0	0	0	0	0	0.682771	0	0	2.25508	0
F1S4_170106_068_H01	73	#476662	Oligo L1-6 OPALIN	3	#F52D19	Non-Neuronal	0	0	0	2.43358	0	0	0	0	0	0	0	0	2.62966	2.55812	0	0	2.38472	0	0	0	2.61416	0	0	0.175495	0	0	0	0	2.24619	0	0	0	0	2.61731
F1S4_170106_139_H01	70	#6B998D	OPC L1-6 PDGFRA	3	#F52D19	Non-Neuronal	0	0	0.283229	0	0.164305	0.164305	0	0	0	0	1.68863	0	0	0	0	0	0	0	0	0	2.12825	0	0	0	2.09102	0	0	0.164305	0	0	1.9893	0	0	0
F1S4_170118_130_H01	71	#665C47	Astro L1-6 FGFR3 SLC14A1	3	#F52D19	Non-Neuronal	0	0	0	0	0.193528	0	0	0	2.44197	0	1.57397	0	0	0	0	0	0	0	0	0	0	0	0	0.32693	0	0	1.53308	1.81295	0	0	0	0	2.47012	0
F1S4_161219_044_H01	70	#6B998D	OPC L1-6 PDGFRA	3	#F52D19	Non-Neuronal	0.236481	0	0	0	0	0.236481	0	0	0	0	0.236481	0	0	0	0	0	0	0	0	2.70864	0	0	2.25472	0	2.36663	0	0	0	2.6402	0.388732	1.61838	0	0	0.782934
F1S4_161219_045_H01	71	#665C47	Astro L1-6 FGFR3 SLC14A1	3	#F52D19	Non-Neuronal	0	0	0	0	1.258	0	0	0.22648	0.374577	0	0.22648	1.51173	0	0	0	0.964467	0	0	0	0	1.42041	0	2.79082	0	0	0	2.41912	0	2.32035	0.22648	1.12456	0	0	0
F1S4_170118_132_H01	71	#665C47	Astro L1-6 FGFR3 SLC14A1	3	#F52D19	Non-Neuronal	0	0	0	0	0	0	0	0	0	0	0.82948	0.197356	0	0	0	0	0	0	0	0.956832	2.64452	0	1.78819	0	1.99726	0	0	0	0.197356	0	1.77161	0	0	0
F1S4_170118_133_H01	71	#665C47	Astro L1-6 FGFR3 SLC14A1	3	#F52D19	Non-Neuronal	0	0	0	0	0	0	0	0	0	0	0	0	2.01236	0	0	0.325008	0	0	0.192223	2.49525	2.46649	0	0	0.192223	0	0	2.65512	0	0	0.192223	0	0	0	0
F1S4_170118_134_H01	70	#6B998D	OPC L1-6 PDGFRA	3	#F52D19	Non-Neuronal	0	0	0	0	1.09921	0.236261	0	0.236261	0	0	2.21774	0	0	0	0	0	0	0	0	0	0	0	2.73954	0	1.01694	0	0	2.53061	0	1.77492	0	1.83398	0	0
F1S4_161219_067_H01	70	#6B998D	OPC L1-6 PDGFRA	3	#F52D19	Non-Neuronal	0	0	0	0	0.206976	0	0	0	0	0	0	0	2.68315	0	0	2.48351	0	0	0	0	0	0	0.206976	0	0	0	0	2.14677	0.346571	0.206976	0	0	0	0
F1S4_170125_008_H01	70	#6B998D	OPC L1-6 PDGFRA	3	#F52D19	Non-Neuronal	0	0	0	0	0.187949	0	0	0	0	0	2.48861	0	0	0	0	0	0	0	0	0	0	0	1.90635	0.187949	0	0	0	0	0	0	0	0	0	0
F1S4_161219_048_H01	70	#6B998D	OPC L1-6 PDGFRA	3	#F52D19	Non-Neuronal	0	0	0.21891	1.32875	0.21891	0.21891	0	0	0	0	0	0	0	0	0	0	0	0	0	0.21891	0	0	2.03276	0.21891	2.27821	0	0	0	0	2.31693	0.472213	0	0	0
F1S4_170118_109_H01	73	#476662	Oligo L1-6 OPALIN	3	#F52D19	Non-Neuronal	0	0	0.291112	1.92465	0.291112	0	0	0.291112	0	0	0	0	0	0.827954	0	0.936451	0	0	0	0	0	0	0	2.89536	0	0	0	2.15905	0	0	0	0	0	2.1704
F1S4_170207_006_H01	72	#6B8059	Astro L1-2 FGFR3 GFAP	3	#F52D19	Non-Neuronal	0	0	0	0	0.360794	0	2.19245	0.216833	0	0	0	0	2.28041	0	0	0	0	0	0	0	0	0	2.48478	0	1.90658	0	2.16062	2.06784	0	0	0	0	0	0
F1S4_170207_007_H01	72	#6B8059	Astro L1-2 FGFR3 GFAP	3	#F52D19	Non-Neuronal	0	0	0	2.17605	0	1.49339	1.88617	0	0	0	0	1.25071	0	1.9826	0	0.52099	0	0	0	0	2.38618	0	0	0	0	0	0	2.90458	0	0.198579	0	0	0	1.52458
F1S4_170118_113_H01	71	#665C47	Astro L1-6 FGFR3 SLC14A1	3	#F52D19	Non-Neuronal	0	0	0	0	0	0	0	0	1.9564	0	0	0	2.20781	0	0	0	0	0	0	0	2.31271	0	2.60792	0.357519	0	0	1.46407	0	0	0.214555	0.937864	0	2.18486	0
F1S4_170118_139_H01	71	#665C47	Astro L1-6 FGFR3 SLC14A1	3	#F52D19	Non-Neuronal	0	0	0	0	0	0.200749	0	0	2.82742	0	0	0	2.16128	1.8472	0	0	0	0	0	0	0	0	0.200749	0	0	0	0	0	0	0	2.36647	0	0	2.17853
F1S4_170118_141_H01	73	#476662	Oligo L1-6 OPALIN	3	#F52D19	Non-Neuronal	0	0	0	0	0.332469	0.197301	0	0	0	0	2.81843	0	0	0	0	0	0	0	0	0	2.547	0	0	0	0	0	0	0	0	0	0	0	0	0
F1S4_170118_142_H01	70	#6B998D	OPC L1-6 PDGFRA	3	#F52D19	Non-Neuronal	0	0	0	0	0	0	0	0	0	0	0.203914	3.15884	0	0	0	0	2.33711	0	0	0	0	0	2.71395	0	0	0	0	0	0	0	0	0	2.46839	0
F1S4_170118_144_H01	73	#476662	Oligo L1-6 OPALIN	3	#F52D19	Non-Neuronal	0	0	0.206986	2.1314	0.206986	0	0	0	0	0	2.75126	0	2.77903	0	0	0	2.40342	0	0	2.89924	2.56725	0	0	1.49872	0	0	0	0	0	2.58346	0.536859	0	0	2.70307
F1S4_170118_146_H01	73	#476662	Oligo L1-6 OPALIN	3	#F52D19	Non-Neuronal	0	0	0	2.48751	0	1.2275	0	0	0	0	2.4766	0	0	0.213624	0	0	2.7348	0	0	0.213624	2.78963	0	0	0	0.213624	0	0	0	0.213624	0	1.09472	0	2.57137	0
F1S4_170125_005_H01	72	#6B8059	Astro L1-2 FGFR3 GFAP	3	#F52D19	Non-Neuronal	0	0	0	0	0.176212	0	0	0	0.176212	0	0	0	0	0	0	0	0	0	2.26281	1.76751	0	0	2.21916	0	0	0	0	0.176212	0	0	0	0	0	0
F1S4_170125_010_H01	75	#598069	Micro L1-3 TYROBP	3	#F52D19	Non-Neuronal	2.60841	0	0	0	2.77818	0	0	0	0	0	0	0	0	0	0	0	0	0	0	0	0	0	1.9325	0.399813	0	0	3.10072	0	0	0	0	0	0	0
F1S4_170125_075_H01	73	#476662	Oligo L1-6 OPALIN	3	#F52D19	Non-Neuronal	0	0	0.239446	0	0	0.239446	0	0	0	0	0	0	2.45698	0	0	1.81777	0	0	0	0	0	0	0.239446	2.86982	0	0	0	0	0	0	0	0	0	0
F1S4_170201_015_H01	72	#6B8059	Astro L1-2 FGFR3 GFAP	3	#F52D19	Non-Neuronal	0	0	0	0	0	0	0	0	1.93173	0	0	0	0.201555	0	0	1.67811	2.00603	0	0	2.60741	0	0	0	0.526638	0	0	0	0	1.40164	0	0	0	0	0
F1S4_170201_041_H01	75	#598069	Micro L1-3 TYROBP	3	#F52D19	Non-Neuronal	0	0	0	0	0.240092	0	0	0	0	0	0	0	0	0	0	0	0	0	0	0	0	3.16709	0	0	0	0	0	0	0.240092	0	3.12279	0	0	2.81527
F1S4_170201_042_H01	73	#476662	Oligo L1-6 OPALIN	3	#F52D19	Non-Neuronal	0.196756	0	0	0	0	0	0	0	0	0	1.49657	0	0.196756	0	0	0	0	0	0	0	0	0	0	0	0	0	0	2.54195	0	2.5703	0	0	0	0
F1S4_161219_005_H01	70	#6B998D	OPC L1-6 PDGFRA	3	#F52D19	Non-Neuronal	0	0	0.264079	0	0.264079	0	0	0	0	0	0.264079	2.39424	0	0	0	2.29777	0	0	0	0	0	0	1.43045	0.264079	0	0	0	0.638239	0	2.25549	0	0	0	0
F1S4_170125_012_H01	70	#6B998D	OPC L1-6 PDGFRA	3	#F52D19	Non-Neuronal	0	0	0	0	0.434231	0	0.269266	0	0	0	0	0	0	0	0	1.66768	0	0	0	0	0.269266	0	2.43388	0	0	0	0	2.25237	0	1.77385	0	0	0	1.48006
F1S4_170125_013_H01	71	#665C47	Astro L1-6 FGFR3 SLC14A1	3	#F52D19	Non-Neuronal	0	0	0	0	0	0	0	0	2.7001	0	1.19015	0	0	1.80119	0	0	0	0	1.34114	0	0	0	2.11158	0	0	0	2.51576	1.73783	0	0	0	0.186618	0	0
F1S4_170125_077_H01	73	#476662	Oligo L1-6 OPALIN	3	#F52D19	Non-Neuronal	0	0	0	0	1.05323	0	0	0	0	0	0	0	0	0	0	0	0	0	0.253484	0	2.09843	0	0	0.253484	0	0	0	0.253484	0	0	0	0	0	0
F1S4_170125_078_H01	73	#476662	Oligo L1-6 OPALIN	3	#F52D19	Non-Neuronal	0	0	0	0	0.405778	0	0	0.405778	0	0	0	0	2.60346	0	0	0	1.51433	0	0	0	0	0	0	2.96479	0	0	0	1.81384	0	0	0	0	0	0
F1S4_170201_001_H01	73	#476662	Oligo L1-6 OPALIN	3	#F52D19	Non-Neuronal	0	0	0	0	0.183534	0	0	0	0.183534	0	0	0	0	0	0	2.52363	0.183534	0	0	2.78347	0.411247	0	0	0.758409	0	0	0	0	0	0	0	0	0	0
F1S4_170201_003_H01	72	#6B8059	Astro L1-2 FGFR3 GFAP	3	#F52D19	Non-Neuronal	0	0	0.242889	0	0.397731	0	1.03109	0	0	0	0	2.07429	2.47387	0	0	0.511642	2.35806	0	0	2.45829	2.40916	0	2.76196	0	0	0	0	0	0	0.242889	0	0	0	0.397731
F1S4_170201_007_H01	72	#6B8059	Astro L1-2 FGFR3 GFAP	3	#F52D19	Non-Neuronal	0	0	0	0	0	0	1.09359	0	2.80682	0	2.47904	0	2.17763	0	0	0	0	0	2.71275	0.213147	2.08417	0	2.15895	0	0	0	0	0	0	2.30093	0	0	0	0
F1S4_170125_014_H01	71	#665C47	Astro L1-6 FGFR3 SLC14A1	3	#F52D19	Non-Neuronal	0	0	0.19916	1.8282	0	0	0	0	0.19916	0	0	0	2.29846	0	0.752405	0	0	0	0	0	2.15523	0	2.16225	0	0	0	2.69253	0	0	0.19916	0.19916	0	0	0
[truncated: 432 more rows]

## Sheet: Ms Astrocytes
sample_name	cluster_id	cluster_color	cluster_label	class_id	class_color	class_label	Gpx1_log10_cpm	Gpx2_log10_cpm	Gpx3_log10_cpm	Gpx4_log10_cpm	Txnrd1_log10_cpm	Txnrd2_log10_cpm	Txnrd3_log10_cpm	Dio1_log10_cpm	Dio2_log10_cpm	Dio3_log10_cpm	Sep15_log10_cpm	Ept1_log10_cpm	Selk_log10_cpm	Selm_log10_cpm	Sepn1_log10_cpm	Selo_log10_cpm	Sepp1_log10_cpm	Msrb1_log10_cpm	Vimp_log10_cpm	Selt_log10_cpm	Sepw1_log10_cpm	Sephs2_log10_cpm	Lrp1_log10_cpm	Lrp2_log10_cpm	Lrp8_log10_cpm	Scly_log10_cpm	Selenbp1_log10_cpm	Secisbp2_log10_cpm	Sepsecs_log10_cpm	Trnau1ap_log10_cpm	Eefsec_log10_cpm	Eif4a3_log10_cpm	Rpl30_log10_cpm	Ncl_log10_cpm
[truncated: 583 more rows]

[truncated: 9 more sheets: Ms Endothelial, Ms Microglial, Ms Oligodendrocytes, Ms OPCs, Hu Astrocytes, Hu Endothelial, Hu Microglia, Hu Oligod, Hu OPCs]
